# Supplementary material for: Nonsynonymous Single-Nucleotide Variations on Some Posttranslational Modifications of Human Proteins and the Association with Diseases
Source: Comput Math Methods Med. 2015 Oct 1;2015:124630. doi: 10.1155/2015/124630 (PMC4606098; doi:10.1155/2015/124630)
Supplement: Supplementary file 1 — Supplementary Table S1: The proteins and their sites of exact matched nsSNVs on each type of PTM. The proteins were shown with their UniProt Accession number. Supplementary Table S2: The information of damaged PTM sites associated diseases annotated by SwissVar. For each type of PTM, the information of associated diseases for the exact matched and around matched PTM sites were given. The alterations between the modified amino acids of one type of PTM marked in red. Supplementary Table S3: Enrichment results of keywords and GO. Both exact matched and ±2 matched results were shown. Inherited diseases were marked in yellow and cancers were marked in green. Supplementary Table S4: Pathway analysis based on IPA. The results were boxed for each type of PTM, and the analysis were performed for both inherited diseases and cancers. P value and the ratio calculated based on IPA were shown. Supplementary Table S5: Summary of biomarker candidates. The biomarker candidates were chosen based on information from IPA and details about them were shown. [file 124630.f1.zip]

Archive with 12 entries (10 files):
- mat.124630.v2/
- mat.124630.v2/Table S1.xls
- mat.124630.v2/Table S2.xlsx
- mat.124630.v2/Table S3.xls
- mat.124630.v2/Table S4.xlsx
- mat.124630.v2/Table S5.xls
- mat.124630.v2/__MACOSX/
- mat.124630.v2/__MACOSX/._Table S1.xls
- mat.124630.v2/__MACOSX/._Table S2.xls
- mat.124630.v2/__MACOSX/._Table S3.xls
- mat.124630.v2/__MACOSX/._Table S4.xls
- mat.124630.v2/__MACOSX/._Table S5.xls
