# Supplementary material for: Nonsynonymous Single-Nucleotide Variations on Some Posttranslational Modifications of Human Proteins and the Association with Diseases
Source: Comput Math Methods Med. 2015 Oct 1;2015:124630. doi: 10.1155/2015/124630 (PMC4606098; doi:10.1155/2015/124630)
Supplement: Supplementary file 1 — Supplementary Table S1: The proteins and their sites of exact matched nsSNVs on each type of PTM. The proteins were shown with their UniProt Accession number. Supplementary Table S2: The information of damaged PTM sites associated diseases annotated by SwissVar. For each type of PTM, the information of associated diseases for the exact matched and around matched PTM sites were given. The alterations between the modified amino acids of one type of PTM marked in red. Supplementary Table S3: Enrichment results of keywords and GO. Both exact matched and ±2 matched results were shown. Inherited diseases were marked in yellow and cancers were marked in green. Supplementary Table S4: Pathway analysis based on IPA. The results were boxed for each type of PTM, and the analysis were performed for both inherited diseases and cancers. P value and the ratio calculated based on IPA were shown. Supplementary Table S5: Summary of biomarker candidates. The biomarker candidates were chosen based on information from IPA and details about them were shown. [file 124630.f1.zip › mat.124630.v2/Table S1.xls]

## Sheet: Phosphorylation
A0AVK6	357
A0AVK6	358
A0FGR8	748
A0JNW5	14
A0JNW5	414
A0MZ66	399
A1L170	222
A1L390	1028
A1L390	1079
A1L390	1169
A1L390	636
A1L390	759
A2PYH4	1120
A2RRH5	757
A2RRP1	2052
A2RTX5	449
A2RU67	597
A3KN83	693
A4D1E9	78
A4D1S0	260
A4D1S0	262
A4D1T9	219
A4FU49	375
A5A3E0	918
A6H8Y1	300
A6NC98	1408
A6NC98	436
A6NCI4	926
A6ND36	127
A6NHL2	342
A6NHT5	147
A6NMZ7	371
A6NNM8	87
A7E2V4	1104
A7MD48	579
A8CG34	369
A8MQ03	39
A8MW92	313
B0YJ81	25
B2RTY4	1382
O00124	163
O00151	118
O00151	130
O00151	144
O00159	415
O00159	79
O00161	110
O00165	266
O00170	248
O00178	384
O00178	577
O00192	872
O00193	82
O00203	276
O00203	750
O00206	175
O00206	790
O00220	424
O00233	121
O00255	548
O00257	207
O00257	336
O00264	178
O00267	768
O00268	543
O00268	601
O00268	857
O00291	35
O00291	516
O00329	520
O00418	366
O00418	396
O00418	477
O00418	500
O00418	66
O00418	74
O00425	30
O00443	73
O00444	592
O00462	477
O00472	310
O00472	315
O00487	179
O00487	32
O00488	98
O00499	303
O00499	307
O00505	24
O00506	342
O00512	352
O00512	907
O00515	356
O00515	394
O00515	64
O00533	1127
O00534	660
O00560	46
O00562	389
O00562	600
O00562	896
O00566	275
O00566	452
O00566	629
O00567	467
O00567	513
O00567	538
O00567	579
O00567	581
O00571	260
O00571	611
O00712	268
O00712	295
O00712	300
O00716	166
O00750	228
O00757	216
O00763	865
O00767	199
O14490	346
O14497	764
O14523	374
O14529	152
O14529	157
O14529	645
O14559	406
O14576	176
O14578	1432
O14579	13
O14617	1032
O14617	759
O14617	827
O14639	353
O14639	638
O14641	27
O14641	463
O14641	729
O14646	1360
O14646	1385
O14646	90
O14647	168
O14682	245
O14686	3199
O14713	127
O14713	25
O14732	55
O14733	271
O14733	275
O14744	286
O14745	280
O14776	489
O14777	34
O14777	502
O14777	62
O14777	66
O14791	311
O14795	461
O14802	936
O14810	115
O14818	30
O14827	1106
O14828	41
O14867	196
O14896	413
O14901	124
O14920	672
O14936	394
O14939	243
O14939	296
O14964	243
O14964	345
O14965	104
O14965	66
O14967	554
O14967	560
O14974	305
O14974	419
O14974	443
O14974	853
O14974	871
O14974	888
O14975	238
O14976	1073
O14976	829
O14980	1030
O14994	470
O15013	1258
O15013	1271
O15013	1283
O15013	59
O15014	1049
O15014	457
O15014	581
O15014	823
O15027	122
O15037	359
O15042	1016
O15042	13
O15042	97
O15047	464
O15055	662
O15063	709
O15066	727
O15075	305
O15075	334
O15083	34
O15085	271
O15085	672
O15117	559
O15143	311
O15145	47
O15151	367
O15164	771
O15164	772
O15164	818
O15169	213
O15169	75
O15169	77
O15169	79
O15213	124
O15226	237
O15226	618
O15229	206
O15231	447
O15231	457
O15232	295
O15234	45
O15265	854
O15266	106
O15287	7
O15320	559
O15320	631
O15320	647
O15327	794
O15355	201
O15355	327
O15357	290
O15357	831
O15360	850
O15360	858
O15381	138
O15381	210
O15381	211
O15381	801
O15382	186
O15394	794
O15397	908
O15400	149
O15400	79
O15417	1925
O15438	1470
O15439	314
O15440	501
O15440	505
O15440	509
O15446	205
O15446	282
O15457	865
O15481	122
O15498	114
O15504	309
O15504	317
O15516	431
O15516	437
O15527	232
O15527	326
O15530	255
O15530	393
O15530	394
O15530	513
O15534	692
O15537	183
O15550	769
O15553	242
O15554	334
O15554	358
O43149	2411
O43159	174
O43159	223
O43159	58
O43164	454
O43164	63
O43166	174
O43166	912
O43175	371
O43175	480
O43181	157
O43181	165
O43181	34
O43182	928
O43193	398
O43237	284
O43237	405
O43252	14
O43264	662
O43290	463
O43296	150
O43296	343
O43312	258
O43312	644
O43318	178
O43324	8
O43353	355
O43353	363
O43353	529
O43379	1142
O43379	1248
O43379	1348
O43379	614
O43379	992
O43395	161
O43395	411
O43395	479
O43395	494
O43395	619
O43396	117
O43399	166
O43488	255
O43490	276
O43491	718
O43491	773
O43491	906
O43511	717
O43513	194
O43516	343
O43524	299
O43524	318
O43524	413
O43524	421
O43559	455
O43572	187
O43597	191
O43597	7
O43598	128
O43602	128
O43602	378
O43602	396
O43602	412
O43613	27
O43663	464
O43665	16
O43683	378
O43683	461
O43688	109
O43707	447
O43707	621
O43707	667
O43719	561
O43719	676
O43736	8
O43741	158
O43760	218
O43765	297
O43768	112
O43795	213
O43815	143
O43818	245
O43829	285
O43896	1082
O43896	702
O43896	703
O43914	102
O43916	398
O43916	55
O43929	8
O43934	204
O60216	342
O60218	23
O60229	1799
O60231	141
O60237	241
O60237	549
O60240	301
O60240	306
O60271	1264
O60271	185
O60271	194
O60271	238
O60271	311
O60271	733
O60281	1017
O60293	128
O60293	352
O60293	40
O60293	41
O60293	717
O60293	804
O60293	974
O60318	527
O60333	707
O60343	609
O60343	752
O60353	620
O60353	626
O60353	629
O60443	252
O60447	115
O60488	483
O60496	345
O60499	108
O60499	110
O60499	134
O60500	1217
O60502	709
O60503	364
O60504	609
O60516	27
O60524	417
O60524	747
O60563	577
O60583	538
O60583	582
O60610	866
O60641	321
O60664	175
O60673	1589
O60674	813
O60674	931
O60711	267
O60711	375
O60711	62
O60716	112
O60716	147
O60716	168
O60716	171
O60716	217
O60716	244
O60716	269
O60716	656
O60716	774
O60716	905
O60716	933
O60716	96
O60721	724
O60732	205
O60732	217
O60762	21
O60762	7
O60762	9
O60784	131
O60784	355
O60784	461
O60812	196
O60825	493
O60841	222
O60841	588
O60883	393
O60883	404
O60884	144
O60885	601
O60927	106
O60934	195
O60934	402
O60934	485
O60934	497
O60941	552
O60942	362
O75030	405
O75044	993
O75052	266
O75054	293
O75061	566
O75061	626
O75096	1887
O75116	425
O75116	567
O75122	364
O75140	445
O75140	592
O75145	1164
O75146	1017
O75151	1058
O75151	625
O75151	730
O75152	179
O75152	181
O75152	761
O75165	102
O75167	522
O75179	1594
O75182	1002
O75182	122
O75185	267
O75185	268
O75251	117
O75312	451
O75340	70
O75351	102
O75362	369
O75362	411
O75362	593
O75362	662
O75369	1433
O75369	1602
O75369	1783
O75369	2298
O75369	2481
O75369	640
O75376	1450
O75376	1479
O75376	1491
O75376	157
O75376	172
O75376	2091
O75379	42
O75382	437
O75385	625
O75385	636
O75385	717
O75410	55
O75417	1786
O75419	148
O75427	182
O75427	515
O75436	225
O75437	317
O75445	463
O75445	471
O75446	202
O75448	875
O75469	8
O75475	115
O75475	116
O75475	275
O75475	434
O75475	443
O75477	324
O75494	119
O75496	202
O75496	203
O75496	60
O75525	231
O75530	50
O75533	259
O75533	267
O75533	308
O75534	481
O75553	198
O75553	232
O75569	287
O75569	78
O75575	47
O75581	127
O75581	1479
O75582	647
O75582	750
O75592	1586
O75592	2643
O75592	2649
O75592	3056
O75592	4283
O75607	143
O75607	16
O75635	217
O75665	171
O75665	669
O75665	686
O75676	44
O75676	542
O75676	568
O75676	737
O75717	383
O75717	801
O75717	868
O75781	162
O75792	86
O75807	264
O75808	335
O75815	290
O75815	358
O75844	250
O75874	19
O75880	230
O75882	1185
O75886	192
O75899	884
O75912	825
O75937	215
O75947	30
O75947	86
O75952	346
O75955	238
O75955	383
O75962	1545
O75969	635
O75970	1262
O75970	358
O75970	717
O75971	85
O75976	1344
O75995	318
O76013	315
O76021	400
O76031	443
O76039	171
O76041	486
O76083	571
O76094	566
O76094	616
O94762	815
O94762	839
O94763	372
O94768	12
O94769	213
O94776	433
O94806	34
O94806	364
O94806	395
O94806	41
O94826	85
O94826	91
O94855	283
O94856	471
O94864	108
O94868	226
O94868	665
O94874	426
O94874	458
O94875	273
O94875	550
O94875	921
O94880	294
O94880	553
O94880	601
O94880	91
O94885	387
O94885	699
O94887	389
O94887	439
O94888	269
O94888	278
O94898	912
O94911	256
O94913	1114
O94913	1485
O94913	1495
O94913	1520
O94913	169
O94913	33
O94913	593
O94913	633
O94913	785
O94915	844
O94916	646
O94919	306
O94921	120
O94921	122
O94921	123
O94921	125
O94933	213
O94979	532
O94986	1258
O94988	644
O94991	846
O95067	8
O95071	1306
O95071	1969
O95071	2011
O95071	2470
O95071	327
O95081	209
O95104	1004
O95147	169
O95155	1265
O95155	26
O95155	27
O95155	798
O95163	1174
O95197	30
O95206	879
O95210	138
O95210	145
O95210	188
O95218	188
O95229	251
O95232	419
O95235	635
O95235	867
O95239	1017
O95239	1028
O95248	546
O95251	512
O95251	52
O95251	56
O95251	99
O95256	401
O95271	365
O95271	839
O95278	25
O95295	112
O95297	16
O95340	9
O95359	161
O95359	2250
O95359	2307
O95359	2390
O95359	2392
O95359	2394
O95359	2455
O95359	2561
O95359	2562
O95359	757
O95359	962
O95361	531
O95361	55
O95365	526
O95391	15
O95391	215
O95391	227
O95400	49
O95402	7
O95425	1111
O95425	1120
O95425	237
O95425	238
O95425	240
O95425	253
O95425	677
O95425	749
O95425	86
O95425	872
O95453	161
O95453	631
O95460	431
O95475	212
O95477	1242
O95477	1255
O95503	39
O95528	369
O95613	191
O95613	259
O95613	3274
O95613	3277
O95625	145
O95625	149
O95625	449
O95625	517
O95639	200
O95644	269
O95644	294
O95671	228
O95671	421
O95684	204
O95696	885
O95707	161
O95714	272
O95721	163
O95747	425
O95755	25
O95755	26
O95757	571
O95772	15
O95772	17
O95772	18
O95777	47
O95785	457
O95786	854
O95789	646
O95793	390
O95810	192
O95810	196
O95810	288
O95817	274
O95817	285
O95819	657
O95819	712
O95835	1012
O95835	255
O95835	277
O95905	325
O95932	115
O95967	426
O95972	235
O95977	377
O95997	183
O95999	134
O95999	218
O96001	68
O96005	216
O96017	372
O96017	383
O96017	390
O96017	41
O96017	45
O96017	52
O96020	19
O96020	21
O96028	114
O96028	376
P00390	408
P00439	16
P00450	429
P00505	128
P00519	253
P00519	610
P00519	852
P00519	968
P00533	1096
P00533	1162
P00533	678
P00533	695
P00533	720
P00533	725
P00533	727
P00533	752
P00533	764
P00533	768
P00533	827
P00533	869
P00558	57
P00558	77
P00568	145
P00918	40
P00966	180
P00966	322
P01009	383
P01024	742
P01036	21
P01037	64
P01106	161
P01106	249
P01106	250
P01106	347
P01106	58
P01111	64
P01116	64
P01130	517
P01130	828
P01130	846
P01133	1170
P01210	196
P01236	179
P01583	87
P01889	344
P01889	350
P02452	171
P02533	129
P02533	415
P02533	433
P02533	435
P02538	176
P02545	10
P02545	303
P02545	395
P02545	534
P02545	583
P02545	613
P02647	221
P02649	147
P02652	37
P02671	577
P02679	140
P02686	169
P02686	232
P02686	295
P02724	139
P02730	21
P02730	29
P02730	303
P02743	21
P02751	2065
P02751	2341
P02786	19
P02786	658
P02794	164
P02810	33
P02810	38
P02812	52
P03372	118
P03372	311
P03372	52
P03372	537
P03956	288
P03956	360
P04004	386
P04004	76
P04049	257
P04049	259
P04049	260
P04049	295
P04049	338
P04049	491
P04049	612
P04062	451
P04075	354
P04080	53
P04083	27
P04114	2018
P04180	205
P04198	64
P04229	107
P04233	8
P04264	193
P04264	297
P04264	507
P04264	638
P04279	139
P04280	40
P04406	151
P04406	153
P04406	176
P04406	210
P04553	9
P04626	1050
P04626	1051
P04626	733
P04629	640
P04632	34
P04632	88
P04637	149
P04637	15
P04637	150
P04637	155
P04637	18
P04637	183
P04637	211
P04637	215
P04637	269
P04637	284
P04637	312
P04637	313
P04637	314
P04637	315
P04637	33
P04637	366
P04637	37
P04637	376
P04637	377
P04637	378
P04637	46
P04637	81
P04637	99
P04792	121
P04792	135
P04792	15
P04921	104
P05023	16
P05023	47
P05060	341
P05060	617
P05067	198
P05067	729
P05091	376
P05106	773
P05106	779
P05111	244
P05129	510
P05129	521
P05181	373
P05181	424
P05181	69
P05187	114
P05187	415
P05204	25
P05362	512
P05387	29
P05387	64
P05387	79
P05388	24
P05455	362
P05549	183
P05549	239
P05556	777
P05771	500
P05783	168
P05783	18
P05783	305
P05783	34
P05787	22
P05787	243
P05787	25
P05787	26
P05787	27
P05787	286
P05787	330
P05787	35
P05787	438
P05787	455
P05787	475
P06127	434
P06127	485
P06132	133
P06213	1361
P06239	59
P06241	15
P06241	512
P06276	226
P06396	361
P06400	321
P06400	567
P06400	606
P06400	612
P06400	794
P06401	20
P06401	676
P06454	14
P06454	8
P06493	15
P06576	23
P06576	230
P06576	25
P06730	53
P06733	237
P06733	254
P06733	44
P06737	727
P06737	733
P06748	234
P06748	242
P06748	254
P06748	29
P06899	15
P07108	51
P07197	30
P07197	558
P07197	641
P07197	670
P07202	561
P07305	66
P07332	412
P07333	567
P07333	723
P07355	123
P07355	127
P07355	22
P07355	235
P07355	30
P07355	317
P07355	85
P07358	346
P07359	575
P07437	382
P07477	8
P07478	8
P07550	262
P07550	396
P07814	346
P07814	690
P07814	859
P07864	220
P07900	252
P07900	399
P07900	677
P07900	704
P07910	100
P07910	119
P07910	126
P07910	238
P07910	299
P07947	32
P07948	194
P07948	265
P07948	306
P07949	1062
P07949	754
P07949	791
P07949	826
P07949	891
P07954	270
P08034	229
P08034	233
P08047	101
P08047	617
P08069	1163
P08100	340
P08133	302
P08151	602
P08151	84
P08183	658
P08183	667
P08183	671
P08195	607
P08195	9
P08238	285
P08238	56
P08240	284
P08254	42
P08559	231
P08559	300
P08567	113
P08567	183
P08575	973
P08579	151
P08581	1003
P08581	1230
P08581	1235
P08581	992
P08621	410
P08631	515
P08648	742
P08651	366
P08670	266
P08670	446
P08670	48
P08670	55
P08684	478
P08708	115
P08729	231
P08729	234
P08922	1923
P08922	2114
P08922	2115
P09234	17
P09327	461
P09382	30
P09429	181
P09496	105
P09525	12
P09603	461
P09619	1009
P09619	589
P09619	970
P09622	276
P09651	22
P09651	244
P09651	312
P09661	236
P09668	103
P09693	145
P09693	171
P09874	372
P09960	172
P09960	600
P0CAP2	179
P0CAP2	72
P0DI83	123
P10070	1194
P10071	445
P10071	669
P10155	19
P10242	11
P10244	505
P10275	791
P10321	183
P10398	181
P10398	186
P10398	214
P10398	318
P10412	146
P10412	71
P10415	69
P10415	74
P10415	87
P10451	143
P10451	195
P10451	224
P10451	275
P10451	291
P10451	66
P10586	1861
P10588	83
P10645	333
P10721	553
P10721	568
P10721	570
P10721	821
P10721	823
P10721	900
P10809	522
P10828	406
P10909	396
P11021	203
P11021	518
P11047	664
P11137	1154
P11137	1347
P11137	1786
P11142	158
P11142	41
P11168	491
P11171	445
P11171	794
P11216	186
P11216	263
P11274	283
P11274	302
P11274	591
P11274	910
P11277	2073
P11387	111
P11388	1117
P11388	1205
P11388	1452
P11388	1471
P11473	208
P11474	19
P11474	31
P11498	304
P11509	131
P11532	1033
P11532	1081
P11532	1647
P11532	3537
P11532	3548
P11532	894
P11717	1107
P11717	1831
P11717	700
P11836	11
P11940	319
P12036	580
P12036	620
P12036	738
P12036	782
P12036	801
P12036	911
P12259	720
P12259	955
P12268	416
P12270	2155
P12270	632
P12270	647
P12270	648
P12277	309
P12694	345
P12694	347
P12757	26
P12830	330
P12830	395
P12830	838
P12830	851
P12882	983
P12883	441
P12931	187
P12931	420
P12955	188
P12956	222
P12956	27
P13051	63
P13073	26
P13349	49
P13489	98
P13521	494
P13569	1176
P13569	1456
P13569	422
P13569	515
P13569	549
P13569	641
P13569	682
P13569	686
P13569	737
P13639	48
P13645	16
P13645	160
P13645	42
P13646	337
P13647	181
P13647	66
P13671	45
P13688	492
P13693	53
P13693	64
P13693	88
P13796	257
P13807	641
P13807	652
P13807	698
P13929	131
P13995	187
P14136	242
P14136	38
P14136	393
P14316	164
P14317	275
P14317	397
P14410	7
P14416	225
P14598	48
P14618	287
P14618	83
P14625	200
P14625	684
P14635	126
P14652	124
P14652	52
P14672	274
P14735	268
P14778	556
P14859	78
P14859	88
P14866	333
P14921	205
P14923	182
P15036	72
P15056	364
P15056	365
P15056	401
P15056	440
P15056	599
P15056	602
P15056	605
P15056	614
P15248	85
P15336	305
P15382	102
P15408	215
P15408	83
P15531	120
P15559	82
P15813	322
P15822	1735
P15822	479
P15822	791
P15923	134
P15924	13
P15924	1658
P15924	2606
P15924	2821
P15924	2856
P15924	299
P15927	13
P15927	14
P15927	174
P15927	23
P15927	33
P15941	1207
P15941	1229
P15976	26
P15976	78
P16066	529
P16070	62
P16070	717
P16109	813
P16144	1487
P16144	1530
P16144	1806
P16144	973
P16150	337
P16152	253
P16157	1380
P16157	1686
P16157	603
P16234	555
P16234	572
P16234	768
P16234	849
P16234	851
P16333	312
P16333	313
P16383	16
P16389	441
P16401	173
P16402	147
P16402	189
P16403	113
P16403	146
P16403	173
P16520	85
P16591	615
P16615	178
P16615	184
P16671	92
P16885	482
P16949	31
P16949	63
P17019	331
P17028	142
P17028	279
P17096	76
P17096	77
P17096	99
P17252	11
P17301	713
P17302	251
P17302	255
P17302	262
P17302	279
P17302	290
P17302	314
P17302	326
P17302	365
P17302	369
P17302	373
P17405	508
P17480	412
P17535	251
P17612	331
P17661	12
P17661	13
P17677	154
P17677	181
P17677	96
P17706	298
P17812	473
P17812	571
P17844	480
P17844	519
P17858	633
P17936	140
P17987	27
P17987	544
P18031	20
P18031	242
P18031	378
P18031	46
P18084	61
P18084	766
P18124	159
P18206	288
P18433	214
P18433	271
P18507	234
P18564	762
P18583	1688
P18583	1782
P18583	1926
P18583	2003
P18583	2163
P18583	908
P18615	131
P18615	181
P18615	281
P18615	353
P18669	238
P18754	274
P18754	89
P18827	299
P18858	141
P18858	47
P18858	51
P18858	91
P18887	224
P18887	284
P18887	461
P18887	485
P18887	518
P18887	519
P19021	942
P19021	957
P19022	860
P19075	122
P19105	59
P19174	525
P19235	426
P19338	41
P19338	69
P19338	97
P19387	208
P19419	383
P19429	166
P19429	31
P19429	77
P19438	280
P19438	360
P19484	227
P19484	469
P19525	255
P19525	90
P19634	685
P19634	771
P19793	260
P19793	27
P19823	60
P19838	851
P19838	903
P19838	939
P19957	17
P20020	1178
P20020	1193
P20042	111
P20042	67
P20273	822
P20290	101
P20339	123
P20393	23
P20585	201
P20674	76
P20700	393
P20794	159
P20807	417
P20810	222
P20810	481
P20810	561
P20810	563
P20839	60
P20929	1824
P20929	6336
P20930	3915
P20936	239
P21127	38
P21127	414
P21333	1604
P21333	2152
P21333	2523
P21333	2618
P21333	564
P21333	69
P21359	2495
P21359	2507
P21359	2510
P21359	2523
P21359	2597
P21359	2802
P21399	383
P21549	297
P21580	466
P21580	614
P21580	778
P21730	327
P21731	329
P21802	347
P21802	454
P21802	782
P21817	2719
P21817	4864
P21860	686
P21912	119
P21980	212
P22033	231
P22059	767
P22087	126
P22102	121
P22105	779
P22314	191
P22392	120
P22415	223
P22492	108
P22607	338
P22607	450
P22612	123
P22626	102
P22626	189
P22626	244
P22670	124
P22670	204
P22681	371
P22681	675
P22681	731
P22735	24
P22735	755
P22735	82
P23246	488
P23284	139
P23284	88
P23396	220
P23443	398
P23458	1034
P23467	738
P23497	471
P23508	120
P23508	484
P23527	41
P23588	131
P23588	207
P23588	224
P23588	32
P23743	22
P23760	201
P23786	215
P23946	38
P24043	1369
P24046	219
P24385	286
P24390	198
P24394	631
P24530	305
P24530	407
P24530	419
P24534	106
P24534	87
P24534	95
P24539	152
P24723	317
P24723	320
P24723	675
P24752	407
P24855	46
P24864	391
P24928	1898
P24941	15
P25054	1360
P25054	1392
P25054	1861
P25054	2129
P25054	2398
P25054	2464
P25054	2570
P25054	2621
P25054	722
P25090	332
P25090	335
P25098	670
P25101	382
P25101	420
P25116	376
P25116	384
P25116	412
P25205	708
P25205	725
P25391	2039
P25391	2042
P25398	24
P25440	57
P25445	198
P25445	214
P25445	232
P25705	219
P25705	64
P25963	305
P25963	32
P26038	469
P26038	66
P26045	372
P26196	199
P26232	321
P26232	651
P26232	653
P26358	1204
P26358	189
P26367	373
P26373	140
P26373	77
P26440	155
P26583	42
P26599	138
P26599	140
P26599	16
P26599	22
P26639	353
P26641	406
P26651	21
P26715	40
P26715	8
P27105	244
P27348	110
P27361	207
P27448	340
P27448	456
P27487	52
P27635	57
P27694	467
P27707	72
P27707	8
P27708	1884
P27816	1001
P27816	216
P27816	380
P27816	526
P27816	57
P27816	571
P27816	787
P27816	828
P27816	876
P27816	937
P27986	265
P27986	452
P27986	463
P27987	176
P27987	204
P28062	234
P28070	55
P28070	75
P28161	201
P28290	1156
P28290	1168
P28329	464
P28329	574
P28482	246
P28482	63
P28562	296
P28715	157
P28749	103
P28749	762
P28827	273
P28827	823
P28838	456
P28906	354
P28908	452
P29033	123
P29083	8
P29084	121
P29144	221
P29144	25
P29317	647
P29317	940
P29320	124
P29323	575
P29323	578
P29374	864
P29374	882
P29375	148
P29376	672
P29460	162
P29474	854
P29475	746
P29508	9
P29558	38
P29590	403
P29590	580
P29590	583
P29692	118
P29692	162
P29692	37
P29803	293
P29803	298
P29966	167
P29972	253
P30041	177
P30048	71
P30084	186
P30086	51
P30154	48
P30260	203
P30260	220
P30260	252
P30260	264
P30260	296
P30260	313
P30260	320
P30260	329
P30260	339
P30260	364
P30260	368
P30260	393
P30260	435
P30260	444
P30260	446
P30279	280
P30281	283
P30291	471
P30301	231
P30304	279
P30304	321
P30304	88
P30305	238
P30305	89
P30307	14
P30307	198
P30307	216
P30411	177
P30414	1335
P30414	1356
P30414	1363
P30414	347
P30414	406
P30414	889
P30501	137
P30530	703
P30531	317
P30556	336
P30622	1009
P30622	140
P30622	147
P30622	162
P30622	172
P30622	182
P30622	328
P30622	45
P30622	47
P30837	283
P30838	305
P30874	353
P30874	354
P31040	456
P31152	186
P31321	77
P31327	1078
P31327	295
P31327	405
P31327	544
P31327	913
P31645	47
P31930	459
P31939	34
P31939	37
P31942	159
P31942	321
P31943	187
P31943	236
P31943	243
P31946	47
P31948	41
P31949	71
P32004	1191
P32004	1194
P32004	1224
P32019	933
P32119	89
P32121	382
P32239	440
P32321	12
P32322	233
P32519	187
P32519	566
P32780	368
P32942	518
P32942	525
P33240	518
P33241	141
P33241	202
P33241	208
P33527	1508
P33527	490
P33527	921
P33778	84
P33981	12
P33981	345
P33981	360
P33981	433
P33981	582
P33981	676
P33991	31
P33991	32
P33991	53
P33992	159
P33993	580
P33993	582
P34896	118
P34910	268
P34931	179
P34931	267
P34932	546
P34932	626
P34947	485
P34972	352
P35221	654
P35222	23
P35222	29
P35222	30
P35222	33
P35222	37
P35222	41
P35222	45
P35240	230
P35241	369
P35241	542
P35249	17
P35251	171
P35251	69
P35251	73
P35269	308
P35269	348
P35269	436
P35346	247
P35367	321
P35367	396
P35372	268
P35372	356
P35372	358
P35372	372
P35408	460
P35462	302
P35520	191
P35568	323
P35568	502
P35568	608
P35568	736
P35568	892
P35579	11
P35579	1504
P35580	1231
P35580	1376
P35580	1938
P35580	1952
P35606	354
P35606	848
P35609	495
P35611	436
P35611	586
P35612	528
P35612	611
P35612	621
P35613	362
P35613	367
P35613	368
P35637	304
P35637	462
P35658	1145
P35658	1211
P35658	1312
P35658	1355
P35658	1936
P35658	39
P35658	670
P35658	911
P35658	987
P35659	159
P35659	288
P35659	303
P35711	528
P35711	534
P35749	1467
P35749	1487
P35789	336
P35869	12
P35908	191
P35908	597
P35908	62
P35916	1230
P35968	984
P36021	290
P36383	324
P36542	45
P36578	295
P36871	115
P36871	353
P36871	369
P36871	467
P36873	307
P36888	401
P36888	572
P36888	574
P36888	591
P36888	599
P36888	842
P36897	186
P36897	200
P36897	295
P36897	298
P36915	563
P36941	298
P36952	108
P36955	114
P37088	663
P37173	336
P37173	441
P37173	553
P38159	134
P38159	206
P38159	214
P38159	251
P38159	320
P38159	335
P38159	337
P38398	1007
P38398	1009
P38398	114
P38398	1140
P38398	1143
P38398	1187
P38398	1196
P38398	1217
P38398	1218
P38398	1239
P38398	1280
P38398	1286
P38398	1301
P38398	1387
P38398	1423
P38398	1450
P38398	1457
P38398	1542
P38398	1550
P38398	1577
P38398	1720
P38398	281
P38398	308
P38398	316
P38398	398
P38398	403
P38398	405
P38398	426
P38398	451
P38398	454
P38398	510
P38398	617
P38398	632
P38398	967
P38432	456
P38432	487
P38646	200
P38646	638
P38919	9
P38935	716
P39019	59
P39023	291
P39023	54
P39687	15
P39687	158
P39748	364
P39880	1312
P39880	749
P40123	311
P40145	1159
P40189	678
P40222	18
P40222	489
P40222	514
P40238	591
P40337	111
P40337	33
P40337	38
P40337	43
P40337	68
P40337	72
P40425	151
P40425	159
P40692	269
P40692	295
P40692	406
P40763	657
P40763	727
P40818	692
P40855	40
P40879	520
P41143	344
P41145	358
P41180	899
P41212	22
P41212	26
[truncated: 5,005 more rows]

## Sheet: Ubiquitylation
A2RUS2	517
C9JH25	536
O00154	168
O00159	740
O00161	49
O00189	353
O00220	443
O00311	212
O00391	676
O00425	280
O00443	261
O00443	301
O00443	613
O00469	344
O00541	98
O00560	14
O00628	186
O00743	132
O00767	68
O14495	15
O14654	618
O14682	520
O14730	456
O14737	97
O14744	490
O14777	264
O14787	334
O14802	713
O14828	81
O14896	66
O14929	280
O14972	100
O14977	47
O14983	515
O15031	1235
O15031	696
O15067	494
O15078	1045
O15121	29
O15144	136
O15164	341
O15259	520
O15269	222
O15269	230
O15269	57
O15270	161
O15347	126
O15360	701
O15371	35
O15375	443
O15379	44
O15438	1344
O15438	512
O15439	293
O15439	304
O15439	66
O15479	250
O43143	786
O43172	159
O43175	69
O43293	327
O43390	389
O43396	181
O43402	110
O43414	230
O43464	237
O43491	171
O43491	178
O43502	83
O43592	634
O43660	135
O43707	54
O43791	279
O43795	241
O43795	972
O43847	341
O43889	156
O60216	387
O60216	596
O60238	154
O60244	1256
O60244	176
O60244	384
O60264	814
O60264	836
O60287	189
O60547	301
O60568	645
O60684	49
O60716	881
O60832	20
O60832	39
O60884	199
O60906	208
O60942	403
O75083	21
O75306	304
O75354	139
O75354	316
O75369	495
O75369	681
O75390	103
O75439	219
O75506	50
O75531	72
O75533	1292
O75533	182
O75533	700
O75563	350
O75586	196
O75665	37
O75665	484
O75665	533
O75718	204
O75746	55
O75792	221
O75792	69
O75874	126
O75882	338
O75884	156
O75886	202
O75915	151
O76003	92
O94776	32
O94776	611
O94817	89
O94901	481
O94906	775
O94927	405
O95071	346
O95071	672
O95071	761
O95163	735
O95336	128
O95433	94
O95456	264
O95470	228
O95470	263
O95573	122
O95573	363
O95602	364
O95758	431
O95999	31
O96006	113
P00338	132
P00338	222
P00338	232
P00338	278
P00338	81
P00338	90
P00390	456
P00533	708
P00533	713
P00533	714
P00533	716
P00533	754
P00533	757
P00533	846
P00533	860
P00558	146
P00558	48
P00918	158
P00918	18
P00918	39
P01106	157
P01116	147
P01591	21
P01591	36
P01889	145
P01889	200
P01889	292
P01889	92
P02545	208
P02545	260
P02545	261
P02545	32
P02545	457
P02545	486
P02545	597
P02545	97
P02751	1050
P02786	145
P04035	288
P04035	396
P04035	460
P04075	230
P04083	90
P04275	1720
P04406	145
P04406	251
P04439	267
P04439	92
P04637	101
P04637	120
P04637	132
P04637	139
P04637	164
P04637	291
P04637	292
P04637	305
P04637	319
P04637	320
P04637	321
P04637	351
P04637	370
P04637	381
P04818	104
P04818	93
P04843	379
P04843	465
P04899	46
P04908	120
P04908	96
P04920	975
P05067	763
P05114	82
P05141	10
P05141	147
P05141	166
P05198	190
P05387	41
P05387	49
P05556	163
P05787	11
P06213	1047
P06454	103
P06454	15
P06493	279
P06733	103
P06733	28
P06737	170
P06737	470
P06737	724
P06744	466
P06748	155
P06748	193
P06748	273
P06753	217
P07195	233
P07195	318
P07195	58
P07195	7
P07197	871
P07197	875
P07333	586
P07339	253
P07355	266
P07355	28
P07437	216
P07437	297
P07437	362
P07737	105
P07741	114
P07858	237
P07910	176
P07910	229
P07910	244
P07910	29
P08183	915
P08238	550
P08243	168
P08581	765
P08621	103
P08621	27
P08621	87
P08684	487
P08708	129
P08727	317
P08727	370
P08754	197
P08758	126
P08910	152
P09012	60
P09234	52
P09601	153
P09601	18
P09601	256
P09622	104
P09629	191
P09874	119
P09874	337
P09936	135
P09960	414
P09960	573
P0C0S8	120
P0C0S8	96
P0C2W1	239
P0CG47	29
P0CG47	48
P10071	784
P10242	84
P10275	847
P10321	200
P10412	117
P10599	8
P10809	58
P10809	82
P10809	96
P11021	601
P11142	128
P11142	159
P11142	458
P11142	539
P11142	557
P11172	314
P11216	364
P11216	521
P11387	326
P11387	603
P11388	893
P11488	47
P11586	28
P11766	113
P11802	155
P11802	22
P11940	229
P11940	231
P12110	1000
P12110	692
P12235	147
P12268	455
P12270	177
P12270	315
P12270	575
P12270	582
P12270	691
P12270	877
P12277	223
P12429	176
P12830	738
P12956	282
P13010	125
P13051	49
P13073	53
P13196	168
P13535	1000
P13647	173
P13667	141
P13747	337
P13797	100
P14209	156
P14314	438
P14618	186
P14618	266
P14625	473
P14625	633
P14678	32
P14923	40
P15104	103
P15121	263
P15153	96
P15311	143
P15311	253
P15311	337
P15374	121
P15374	210
P15498	222
P15531	56
P16083	16
P16144	662
P16401	168
P16401	49
P16402	35
P16402	53
P16403	159
P16403	206
P16403	34
P16403	52
P16455	178
P16615	169
P16949	95
P16989	353
P16989	96
P17028	27
P17174	166
P17655	476
P17812	335
P17861	151
P17980	233
P17987	73
P18074	101
P18074	751
P18077	8
P18124	40
P18124	88
P18206	386
P18206	464
P18827	304
P18848	45
P19021	901
P19338	403
P19525	400
P20020	256
P20020	337
P20073	199
P20700	157
P20700	209
P20839	450
P20908	1391
P20962	15
P21266	128
P21266	54
P21281	64
P21283	147
P21333	837
P21399	580
P21399	644
P21796	61
P22234	36
P22234	53
P22314	322
P22626	104
P22695	23
P22695	375
P23229	939
P23284	165
P23381	27
P23396	10
P23634	561
P23743	487
P23921	111
P23921	414
P23921	590
P24394	192
P24539	131
P24752	174
P24941	278
P25205	748
P25786	256
P25787	227
P26010	779
P26038	448
P26440	55
P26583	147
P27348	158
P27348	74
P27348	80
P27708	1323
P27816	394
P27816	574
P27824	547
P28066	196
P28074	257
P28288	347
P28290	102
P28482	292
P28838	476
P29033	122
P29373	31
P29401	283
P29966	11
P30040	182
P30048	149
P30048	196
P30085	43
P30153	307
P30154	119
P30154	428
P30260	330
P30260	441
P30260	588
P30305	452
P30405	190
P30559	234
P30613	348
P30613	354
P30876	1058
P30876	993
P31629	482
P31939	177
P31939	199
P31939	389
P31941	137
P31943	35
P31947	49
P31948	325
P32189	31
P32298	216
P32856	69
P33527	1265
P33527	303
P33778	44
P33981	538
P33991	220
P33991	600
P33993	10
P33993	305
P34932	754
P35219	96
P35222	19
P35222	335
P35222	49
P35240	387
P35251	568
P35579	373
P35579	810
P35579	833
P35580	840
P35609	42
P35610	531
P35613	257
P35613	366
P35998	116
P35998	120
P35998	13
P35998	46
P35998	57
P36405	35
P36542	270
P36543	138
P36551	404
P36888	614
P37108	74
P37268	358
P37837	269
P37837	321
P38159	22
P38398	1667
P38432	555
P39019	38
P40337	196
P40925	164
P40925	298
P40926	301
P40926	307
P40937	25
P40938	20
P40939	303
P41002	97
P41252	1042
P41252	1061
P42166	416
P42166	435
P42166	674
P42167	393
P42224	511
P42566	801
P42679	116
P42694	56
P42695	1246
P42702	804
P42766	79
P42785	462
P43121	616
P43246	249
P43246	555
P43246	567
P43250	240
P43250	402
P43308	27
P45974	575
P46734	243
P46779	65
P46779	84
P46781	180
P46782	18
P46782	42
P46783	138
P46783	59
P46821	1976
P46940	1562
P47895	263
P47895	33
P47895	423
P48029	627
P48047	172
P48047	73
P48047	98
P48163	26
P48163	60
P48200	23
P48200	696
P48357	891
P48444	309
P48449	15
P48449	65
P48509	8
P48643	150
P48651	251
P48651	261
P48739	104
P49006	99
P49321	643
P49327	1429
P49356	418
P49411	234
P49458	61
P49588	820
P49720	17
P49721	34
P49755	169
P49755	75
P49792	2935
P49815	914
P49915	9
P50395	164
P50395	221
P50395	253
P50453	297
P50542	456
P50570	414
P50579	79
P50748	43
P50750	24
P50851	1243
P50851	1487
P50914	103
P50990	260
P50991	288
P51148	180
P51149	32
P51587	1872
P51610	1863
P51610	813
P51648	266
P51648	326
P51665	204
P51797	224
P51809	125
P51809	137
P51970	61
P52209	38
P52272	214
P52292	392
P52597	87
P52701	476
P52701	646
P52701	728
P52788	151
P52907	226
P52948	572
P53007	255
P53350	272
P53396	1080
P53396	12
P53396	230
P53396	272
P53396	780
P53621	13
P53621	81
P53990	205
P53992	1048
P53999	53
P54136	20
P54252	206
P54577	114
P54578	214
P54725	26
P54725	69
P54727	45
P54727	76
P54920	285
P55011	280
P55011	958
P55011	995
P55036	74
P55072	524
P55081	390
P55327	120
P55854	34
P55884	604
P55884	744
P56192	364
P56282	166
P56377	17
P56556	147
P56945	702
P57075	240
P57078	51
P58340	122
P58876	35
P58876	44
P59045	655
P60174	197
P60228	407
P60484	13
P60484	289
P60842	225
P60900	45
P60903	18
P61088	94
P61106	170
P61158	251
P61160	381
P61221	116
P61221	178
P61604	40
P61619	395
P61923	51
P61962	30
P61978	198
P61978	396
P62158	31
P62158	95
P62195	15
P62195	330
P62258	125
P62277	78
P62333	206
P62491	207
P62701	22
P62714	283
P62736	317
P62736	328
P62805	32
P62805	60
P62805	78
P62805	80
P62805	92
P62807	109
P62807	35
P62888	32
P62888	57
P62906	118
P62906	91
P62917	177
P62917	46
P62979	143
P63000	133
P63092	274
P63092	338
P63162	8
P63172	38
P63208	137
P63218	27
P63218	36
P63241	85
P63261	61
P67775	21
P67775	34
P67809	64
P67809	81
P68032	63
P68036	131
P68036	20
P68036	67
P68371	252
P68371	336
P68431	19
P68431	28
P68431	37
P68431	80
P78316	834
P78318	253
P78346	161
P78527	1057
P78527	1970
P78527	2259
P78527	263
P78527	2702
P78527	2950
P78527	310
P78527	3710
P78527	4036
P78549	83
P80217	40
P80303	90
P82909	60
P83436	521
P83731	43
P83916	139
P84098	144
P84243	28
P84243	37
P98170	116
P98170	433
P98194	514
P99999	40
P99999	54
Q00059	62
Q00325	218
Q00537	197
Q00610	367
Q00610	941
Q00688	27
Q00839	352
Q01082	593
Q01628	83
Q01831	849
Q02218	74
Q02223	106
Q02241	636
Q02539	100
Q02539	109
Q02539	67
Q02543	151
Q02750	192
Q02750	57
Q02790	222
Q02790	409
Q02878	100
Q02878	207
Q02878	237
Q02880	1302
Q02930	432
Q02952	1234
Q02952	1750
Q02952	177
Q02952	192
Q02952	54
Q02952	672
Q02952	875
Q03252	166
Q04323	96
Q04446	68
Q04637	593
Q04695	172
Q04917	110
Q04917	69
Q04917	77
Q05086	71
Q05086	802
Q05519	197
Q06830	109
Q07020	30
Q07020	97
Q07021	174
Q07820	197
Q07955	138
Q07960	212
Q08722	314
Q08752	341
Q08945	228
Q08945	90
Q08J23	46
Q09019	279
Q09161	204
Q0IIM8	118
Q10471	189
Q10713	269
Q10713	299
Q10713	478
Q12789	414
Q12797	512
Q12834	114
Q12905	45
Q13045	21
Q13057	235
Q13077	193
Q13099	517
Q13107	186
Q13107	811
Q13123	173
Q13148	263
Q13177	468
Q13200	119
Q13200	286
Q13200	39
Q13200	858
Q13232	51
Q13263	127
Q13283	36
Q13310	108
Q13347	282
Q13435	790
Q13438	380
Q13451	376
Q13485	507
Q13490	340
Q13490	446
Q13501	165
Q13503	131
Q13505	190
Q13505	218
Q13535	2587
Q13561	175
Q13564	187
Q13569	201
Q13595	198
Q13601	121
Q13601	168
Q13619	104
Q13630	21
Q13635	163
Q13686	137
Q13748	280
Q13748	336
Q13748	60
Q13748	96
Q14103	114
Q14146	858
Q14149	293
Q14152	694
Q14152	777
Q14156	664
Q14160	313
Q14166	451
Q14181	564
Q14192	167
Q14203	1179
Q14204	2401
Q14204	3774
Q14204	671
Q14240	285
Q14240	55
Q14247	171
Q14247	87
Q14249	66
Q14258	301
Q14444	125
Q14517	1335
Q14517	935
Q14527	340
Q14566	611
Q14573	1216
Q14573	1827
Q14573	545
Q14574	180
Q14642	73
Q14667	555
Q14683	637
Q14697	472
Q14739	601
Q14764	444
Q14774	175
Q14790	148
Q14847	23
Q14847	75
Q14914	70
Q14CX7	357
Q15004	15
Q15007	19
Q15008	371
Q15021	580
Q15047	182
Q15126	48
Q15149	1427
Q15149	3027
Q15233	249
Q15269	523
Q15293	70
Q15306	123
Q15334	27
Q15349	630
Q15375	601
Q15386	25
Q15386	739
Q15386	793
Q15392	254
Q15435	162
Q15435	222
Q15477	539
Q15554	293
Q15649	123
Q15651	55
Q15691	66
Q15811	658
Q15833	13
Q15833	193
Q15843	48
Q15910	61
Q15942	265
Q16186	390
Q16186	397
Q16222	415
Q16531	1067
Q16531	1131
Q16543	110
Q16543	69
Q16585	202
Q16659	480
Q16659	517
Q16690	294
Q16695	37
Q16777	119
Q16777	96
Q16795	137
Q16891	506
Q1KMD3	553
Q29RF7	292
Q2KHM9	208
Q2KHM9	440
Q2KHM9	586
Q2M389	968
Q2TAL8	489
Q2VPK5	335
Q2VPK5	471
Q32P44	577
Q3B7T1	637
Q3SXM5	64
Q3SY84	147
Q4ADV7	111
Q53EL6	166
Q53FV1	79
Q53GQ0	95
Q5HYI7	77
Q5JSH3	518
Q5MNZ6	42
Q5QNW6	35
Q5QNW6	44
Q5SRE5	470
Q5SSJ5	291
Q5SVZ6	1018
Q5T160	446
Q5T2T1	433
Q5T9L3	410
Q5TAX3	680
Q5TBA9	92
Q5TDH0	205
Q5TDH0	289
Q5TEU4	109
Q5TFE4	77
Q5VSL9	828
Q5VV67	1645
Q5VWN6	694
Q5VWZ2	70
Q5W0B1	292
Q5W0Z9	91
Q63ZY3	48
Q69YN4	576
Q69YN4	887
Q6FI81	31
Q6GQQ9	651
Q6IC98	168
Q6IPU0	37
Q6IQ20	73
Q6L8Q7	417
Q6NSI4	483
Q6NUI2	784
Q6NUM9	56
Q6NXE6	274
Q6NXR4	495
Q6NXR4	97
Q6NXT6	90
Q6NZI2	98
Q6P0N0	1066
Q6P0N0	113
Q6P1M9	45
Q6P1N9	46
Q6P2Q9	1344
Q6P2Q9	1649
Q6P2Q9	1792
Q6P2Q9	428
Q6P4A7	106
Q6P4A7	230
Q6P4I2	66
Q6PI26	69
Q6PJT7	471
Q6PL18	311
Q6Q0C0	199
Q6S8J3	684
Q6S8J3	913
Q6UWJ1	132
Q6UXN9	129
Q6WKZ4	1212
Q6WRX3	469
Q6YP21	82
Q6ZWJ1	16
Q70CQ2	1134
Q70CQ2	3100
Q71F23	393
Q71U36	164
Q71UM5	16
Q76L83	1245
Q7KZF4	249
Q7L2H7	115
Q7L2H7	365
Q7L590	627
Q7L5Y9	121
Q7L5Y9	23
Q7LG56	166
Q7RTS7	157
Q7RTY0	420
Q7RTY1	219
Q7Z333	1190
Q7Z333	218
Q7Z333	629
Q7Z333	827
Q7Z3B3	372
Q7Z3B4	363
Q7Z3U7	281
Q7Z4H7	847
Q7Z4W1	17
Q7Z569	385
Q7Z6Z7	1247
Q7Z6Z7	1608
Q7Z6Z7	2703
Q7Z7H5	152
Q7Z7L7	31
Q86TV6	785
Q86UA6	22
Q86US8	995
Q86UW6	414
Q86V21	95
Q86V86	172
Q86XI2	601
Q86Y07	223
Q86Y07	443
Q86Y13	703
Q86Y13	846
Q86Y56	445
Q86Y56	655
Q86YQ8	405
Q86YT6	618
Q86Z02	855
Q8IUX1	27
Q8IV38	366
Q8IV38	416
Q8IW92	165
Q8IW92	516
Q8IWA0	676
Q8IWA5	209
Q8IWC1	541
Q8IWV8	779
Q8IWV8	994
Q8IWZ6	577
Q8IY81	214
Q8IYL2	389
Q8IYY4	272
Q8IZV5	319
Q8IZW8	518
Q8N0X7	377
Q8N138	79
Q8N163	287
Q8N163	916
Q8N1F7	586
Q8N1F7	633
Q8N2U9	122
Q8N3C0	1416
Q8N3C0	860
Q8N3Y1	427
Q8N4T4	122
Q8N5L8	86
Q8N5Y2	289
Q8N653	375
Q8N6H7	429
Q8N6T3	278
Q8N766	52
Q8N884	347
Q8NBF2	133
Q8NBI6	321
Q8NBJ7	199
Q8NBQ5	70
Q8NC51	236
Q8NCF5	129
Q8NDN9	522
Q8NE00	381
Q8NE01	306
Q8NE01	519
Q8NE01	640
Q8NEB9	158
Q8NF50	894
Q8NF99	225
Q8NF99	35
Q8NFC6	2981
Q8NFG4	206
Q8NFH4	118
Q8NFI3	381
Q8NHU3	116
Q8NI36	814
Q8NI60	246
Q8TAA9	299
Q8TAE8	127
Q8TAM2	308
Q8TAM2	532
Q8TAT5	567
Q8TAW3	381
Q8TBB5	49
Q8TBC4	260
Q8TBC4	434
Q8TC07	589
Q8TCA0	43
Q8TCD5	146
Q8TCJ0	146
Q8TCT9	61
Q8TD10	239
Q8TD19	199
Q8TD43	492
Q8TDP1	143
Q8TED0	36
Q8TED0	398
Q8TED0	497
Q8TEL6	157
Q8TER5	1191
Q8TF42	411
Q8TF46	283
Q8TF71	508
Q8WTP8	235
Q8WUA2	212
Q8WUM0	787
Q8WUM4	357
Q8WUM4	638
Q8WUM4	707
Q8WUM9	295
Q8WUM9	441
Q8WUS8	96
Q8WVM8	63
Q8WVV5	152
Q8WVY7	292
Q8WW33	152
Q8WWM7	207
Q8WWM7	267
Q8WWQ0	1528
Q8WX94	817
Q8WY22	71
Q92503	352
Q92520	156
Q92542	403
Q92547	224
Q92572	13
Q92572	41
Q92574	725
Q92598	95
Q92608	1424
Q92608	268
Q92608	371
Q92615	201
Q92615	321
Q92783	171
Q92797	520
Q92820	212
Q92820	235
Q92878	1190
Q92878	242
Q92887	294
Q92903	270
Q92930	100
Q92945	109
Q92995	190
Q92997	283
Q93009	355
Q93009	934
Q93009	98
Q93050	666
Q93077	120
Q93079	44
Q93079	47
Q93096	144
Q93096	32
Q969S2	234
Q969S3	125
Q969V5	273
Q969X6	368
Q96A54	86
Q96AA3	212
Q96AJ1	200
Q96B77	55
Q96BJ8	684
Q96BW5	225
Q96BW5	81
Q96BY2	85
Q96BY2	94
Q96C01	48
Q96CS2	17
Q96CU9	42
Q96CW1	224
Q96DR4	34
Q96DX7	314
Q96DZ1	300
Q96EK4	38
Q96EP0	640
Q96EP9	410
Q96ER3	209
Q96F07	1077
Q96FQ6	61
Q96G03	27
Q96G03	292
Q96G74	205
Q96GD4	211
Q96GG9	191
Q96GM8	164
Q96HJ9	40
Q96HP0	879
Q96HU1	146
Q96IY1	59
Q96J02	478
Q96JA3	416
Q96JH7	182
Q96JI7	2208
Q96JI7	350
Q96JJ7	414
Q96JK2	699
Q96L34	183
Q96L93	694
Q96LD4	361
Q96NB2	308
Q96PD2	410
Q96PD2	739
Q96Q06	71
Q96Q45	209
Q96R06	483
Q96RK4	20
Q96RL1	215
Q96RL1	374
Q96RL1	559
Q96RL1	9
Q96RL7	2923
Q96RL7	3000
Q96RU2	839
Q96S38	674
Q96S55	335
Q96S59	445
Q96S82	20
Q96S82	92
Q96SB8	928
Q96SN8	1203
Q96SW2	166
Q96SY0	376
Q96T58	2971
Q96TA2	253
Q99439	234
Q99460	20
Q99467	176
Q99547	86
Q99558	106
Q99567	630
Q99567	680
Q99615	155
Q99640	126
Q99728	423
Q99729	91
Q99733	105
Q99808	255
Q99829	529
Q99832	135
Q99880	44
Q99986	188
Q99986	301
Q9BPX5	69
Q9BPY3	315
Q9BQ67	333
Q9BQE4	77
Q9BQI3	303
Q9BRA2	25
Q9BRJ2	273
Q9BRJ2	54
Q9BRQ8	225
Q9BSD7	171
Q9BSH5	32
Q9BSL1	330
Q9BT22	223
Q9BTC0	383
Q9BTV4	99
Q9BTV5	13
Q9BTW9	691
Q9BTX1	430
Q9BU23	533
Q9BUI4	192
Q9BUK6	529
Q9BUX1	151
Q9BV23	126
Q9BV40	24
Q9BVA1	58
Q9BVC4	86
Q9BVK2	223
Q9BVV7	185
Q9BWH2	68
Q9BWH6	1337
Q9BX40	172
Q9BXL8	160
Q9BXW9	33
Q9BY44	169
Q9BY50	23
Q9BY77	197
Q9BYD6	108
Q9BZC7	2025
Q9BZE1	334
Q9BZG8	226
Q9BZG8	43
Q9BZV1	180
Q9C0D2	265
Q9GZQ8	65
Q9GZR7	320
Q9GZY4	134
Q9GZY4	90
Q9GZZ1	91
Q9H0A8	50
Q9H0C5	264
Q9H0D6	640
Q9H0R3	101
Q9H0U3	91
Q9H1A4	429
Q9H1V8	679
Q9H2G4	384
Q9H2G9	370
Q9H2H9	384
Q9H2P0	773
Q9H2X6	32
Q9H361	213
Q9H361	231
Q9H3C7	119
Q9H3F6	171
Q9H3S7	32
Q9H3U1	707
Q9H425	306
Q9H444	107
Q9H4H8	476
Q9H4I3	225
Q9H4K7	123
Q9H4Y5	11
Q9H553	285
Q9H583	510
Q9H583	568
Q9H5J4	31
Q9H668	176
Q9H6K1	228
Q9H6V9	93
Q9H788	126
Q9H7F0	188
Q9H871	365
Q9H8V3	817
Q9H930	248
Q9H967	104
Q9H974	402
Q9H9B4	202
Q9H9E3	176
Q9H9T3	206
Q9HA47	204
Q9HAD4	377
Q9HBU6	274
Q9HBU6	378
Q9HCC0	506
Q9HCS7	188
Q9HD15	83
Q9HD45	59
Q9NP72	123
Q9NP97	75
Q9NPD8	182
Q9NQ89	247
Q9NQH7	323
Q9NQR1	267
Q9NQS3	451
Q9NQS3	492
Q9NQW7	98
Q9NQZ5	137
Q9NR09	2270
Q9NR19	426
Q9NR45	55
Q9NRC1	384
Q9NRW7	378
Q9NS91	110
Q9NS91	186
Q9NS91	197
Q9NS91	376
Q9NSE4	687
Q9NT62	185
Q9NTJ3	1112
Q9NTJ3	202
Q9NTX5	45
Q9NU22	778
Q9NU53	294
Q9NUJ1	248
Q9NUP9	76
Q9NUQ2	183
Q9NUQ9	207
Q9NUU7	186
Q9NV79	194
Q9NVH1	126
Q9NVH2	31
Q9NVI1	331
Q9NVI1	715
Q9NVI1	939
Q9NVV0	273
Q9NW08	324
Q9NW15	193
Q9NWD9	91
Q9NWF9	666
Q9NWT8	193
Q9NWU5	105
Q9NWV8	126
Q9NX02	1037
Q9NX04	87
Q9NX40	238
Q9NXE4	414
Q9NXV6	99
Q9NY12	150
Q9NY61	383
Q9NY61	69
Q9NY65	370
Q9NY65	401
Q9NYB0	316
Q9NYF8	593
Q9NYV6	22
Q9NZ01	22
Q9NZ52	15
Q9NZI8	26
Q9NZJ4	1797
Q9NZM1	1223
Q9NZN3	220
Q9P015	28
Q9P032	66
Q9P035	43
Q9P0J0	7
Q9P0L0	161
Q9P0N9	277
Q9P1W9	165
Q9P260	877
Q9P2G1	1012
Q9P2I0	499
Q9UBB4	288
Q9UBD5	55
Q9UBE0	228
Q9UBE0	32
Q9UBQ0	73
Q9UBR5	131
Q9UBU8	226
Q9UBU8	240
Q9UER7	277
Q9UFF9	206
Q9UFF9	280
Q9UG56	346
Q9UG63	522
Q9UGL1	109
Q9UGL1	1166
Q9UGN5	348
Q9UGP8	407
Q9UGP8	633
Q9UGP8	710
Q9UHB9	504
Q9UHC7	202
Q9UHG3	205
Q9UHP3	15
Q9UHP3	201
Q9UHP3	630
Q9UHP3	669
Q9UHQ4	96
Q9UIG0	297
Q9UIG0	588
Q9UJJ9	207
Q9UJW0	146
Q9UJW0	206
Q9UJW0	215
Q9UJX4	366
Q9UJX4	403
Q9UJX4	698
Q9UK61	795
Q9UK99	390
Q9UKA1	100
Q9UKK3	305
Q9UKK3	429
Q9UKK3	594
Q9UKK3	90
Q9UKK3	96
Q9UKL3	1284
Q9UKM9	216
Q9UKM9	34
Q9UKN5	412
Q9UKN8	137
Q9UKV3	302
Q9UL01	552
Q9UL01	728
Q9ULF5	533
Q9ULT0	655
Q9ULV4	311
Q9ULX3	333
Q9UM54	1119
Q9UMS4	380
Q9UNA4	296
Q9UNH7	204
Q9UNH7	269
Q9UNK0	59
Q9UNL2	8
Q9UNN5	139
Q9UNS2	254
Q9UNS2	281
Q9UNX3	63
Q9UNY4	707
Q9UNY4	814
Q9UNY4	871
Q9UNZ2	113
Q9UPN4	200
Q9UPT9	144
Q9UPW5	44
Q9UPY5	37
Q9UQE7	180
Q9Y217	466
Q9Y221	94
Q9Y230	417
Q9Y234	150
Q9Y236	221
Q9Y240	49
Q9Y244	33
Q9Y248	118
Q9Y295	126
Q9Y295	213
Q9Y2E4	1251
Q9Y2G4	40
Q9Y2I6	495
Q9Y2L1	815
Q9Y2X9	539
Q9Y2Y6	144
Q9Y2Z0	274
Q9Y2Z2	637
Q9Y312	131
Q9Y312	44
Q9Y320	193
Q9Y320	215
Q9Y385	177
Q9Y3C6	58
Q9Y448	212
Q9Y487	172
Q9Y487	363
Q9Y487	374
Q9Y4A5	2022
Q9Y4A5	579
Q9Y4B6	1224
Q9Y4C1	905
Q9Y4E5	349
Q9Y4E5	454
Q9Y4L1	398
Q9Y4X5	316
Q9Y508	96
Q9Y520	665
Q9Y546	389
Q9Y573	185
Q9Y5B9	792
Q9Y5Q9	481
Q9Y5W7	642
Q9Y5X0	148
Q9Y5X1	179
Q9Y5X1	440
Q9Y5Y6	45
Q9Y617	190
Q9Y617	269
Q9Y617	27
Q9Y617	94
Q9Y624	178
Q9Y673	118
Q9Y6H5	261
Q9Y6I8	86
Q9Y6M1	77
Q9Y6M7	130
Q9Y6N1	269
Q9Y6Q5	14
Q9Y6Q5	296
Q9Y6Q5	396
Q9Y6W3	130
Q9Y6W3	495

## Sheet: Acetylation
C9JLW8	79
O00154	168
O00159	647
O00165	2
O00186	577
O00186	581
O00222	872
O00257	149
O00299	13
O00541	98
O14686	4776
O14920	180
O14929	2
O15083	879
O15160	2
O15305	149
O15392	110
O15392	129
O43147	590
O43148	128
O43175	2
O43361	539
O43390	389
O43592	634
O43602	131
O43708	32
O43823	534
O60218	125
O60218	95
O60232	2
O60563	380
O60563	404
O60645	232
O60684	1
O60814	16
O60814	24
O60832	2
O75165	84
O75369	681
O75521	51
O75822	2
O75891	876
O75947	72
O75964	2
O76003	92
O76031	437
O76031	98
O94762	2
O95139	2
O95140	355
O95183	26
O95336	180
O95456	264
O95677	1
O95997	2
P00338	222
P00338	278
P00338	81
P00352	410
P00480	46
P00480	88
P00558	146
P00558	48
P01011	237
P01106	157
P02461	1387
P02545	97
P03372	268
P03372	299
P04040	476
P04075	230
P04406	251
P04637	120
P04637	164
P04637	292
P04637	305
P04637	319
P04637	320
P04637	321
P04637	370
P04637	381
P04908	2
P04908	96
P05114	31
P05114	82
P05141	268
P05204	11
P05204	36
P05386	2
P05387	49
P05813	131
P06396	61
P06400	873
P06454	103
P06454	15
P06493	1
P06733	103
P06733	105
P06733	28
P06737	470
P06748	27
P06748	273
P06899	13
P07108	2
P07148	46
P07195	2
P07195	58
P07195	7
P07737	105
P07741	114
P07814	497
P07900	414
P07900	576
P07954	172
P08047	2
P08107	2
P08133	607
P08758	2
P09012	60
P09234	52
P09429	30
P09525	225
P09601	18
P09622	417
P09960	414
P09960	573
P0C0S5	8
P0C0S8	120
P0C0S8	14
P0C0S8	2
P0C0S8	96
P0C5Z0	10
P0CG47	48
P10275	630
P10644	1
P10809	130
P10809	82
P11021	154
P11182	295
P11216	2
P11413	386
P11586	56
P11717	2352
P12235	2
P12236	92
P12956	282
P13073	53
P13796	361
P13984	22
P14550	2
P14618	266
P14921	1
P15121	263
P15311	253
P15311	60
P15498	222
P15531	56
P15692	147
P16401	168
P16401	17
P16401	49
P16402	64
P16403	169
P16403	34
P16403	52
P16949	95
P17661	240
P17844	40
P18031	1
P18077	8
P19338	116
P19338	403
P19429	2
P19525	2
P20248	112
P20700	157
P20810	529
P20908	1686
P20962	15
P21291	108
P21333	837
P21333	994
P21673	26
P21796	28
P21796	61
P22061	2
P22234	53
P23141	402
P23284	165
P23368	346
P23443	304
P23527	24
P24752	174
P25205	2
P25205	569
P26358	1415
P26358	366
P26358	891
P26583	12
P26640	2
P27695	35
P27797	64
P29033	105
P29033	15
P29401	144
P29401	597
P29508	1
P30038	462
P30042	164
P30048	91
P30566	147
P30566	2
P30613	348
P31151	2
P31939	199
P31948	301
P31948	325
P33778	24
P33778	25
P33991	220
P34896	2
P34897	269
P35222	19
P35222	49
P35663	129
P35663	133
P35663	396
P35914	48
P35998	116
P36578	2
P36952	277
P37802	2
P37837	269
P37837	286
P37837	321
P38646	234
P38646	288
P39019	23
P40925	298
P40926	301
P40926	307
P40938	20
P40939	303
P40939	390
P40939	540
P41212	11
P41567	1
P41567	2
P42765	181
P43246	555
P46100	768
P46782	2
P46976	2
P48047	172
P48163	60
P48426	2
P48444	211
P48444	309
P48552	446
P48637	2
P48735	272
P49354	2
P49419	439
P49736	2
P49753	104
P49754	761
P49802	228
P49840	2
P49915	9
P50402	1
P50549	33
P50851	2117
P50914	193
P50991	288
P50991	302
P51003	736
P51531	1553
P51532	1033
P51587	454
P51610	813
P51665	204
P51948	1
P52209	38
P52564	82
P52565	2
P52597	87
P52895	179
P52895	75
P53007	255
P53674	160
P54132	755
P54274	2
P54687	1
P54727	45
P54840	397
P55010	2
P55072	524
P55317	237
P55795	1
P55884	744
P56134	2
P56937	321
P57053	16
P57053	24
P58876	35
P58876	86
P59998	2
P59998	89
P60484	125
P60484	128
P61088	94
P61158	251
P61165	1
P61604	40
P61803	2
P62136	147
P62158	95
P62258	1
P62333	206
P62701	22
P62736	328
P62805	13
P62805	2
P62805	21
P62805	32
P62805	60
P62805	78
P62805	80
P62805	9
P62805	92
P62807	109
P62807	13
P62807	16
P62807	17
P62807	24
P62807	35
P62807	86
P62826	2
P62847	115
P62906	118
P62906	91
P62913	2
P62917	46
P63151	2
P63162	8
P63165	2
P63261	61
P67809	81
P68032	63
P68036	131
P68431	19
P68431	28
P68431	37
P68431	80
P68871	18
P69892	2
P69905	17
P78329	294
P78329	346
P78527	1057
P78527	1970
P78527	2259
P78527	2702
P80294	1
P82979	142
P83916	139
P84243	28
P84243	37
P98082	2
P98168	316
P99999	2
P99999	88
Q00610	764
Q00688	160
Q00688	2
Q00839	352
Q01082	2
Q01469	2
Q01469	55
Q01518	2
Q01813	747
Q02539	109
Q04446	68
Q06124	2
Q06187	2
Q06520	177
Q07960	212
Q08188	2
Q08945	33
Q08945	90
Q09161	204
Q09472	1554
Q09472	1570
Q09472	1760
Q10471	521
Q10713	299
Q12874	92
Q13011	318
Q13045	21
Q13085	2127
Q13153	2
Q13177	128
Q13177	2
Q13310	108
Q13428	1362
Q13485	428
Q13485	45
Q13485	507
Q13523	358
Q13523	905
Q13748	60
Q13765	108
Q14134	300
Q14204	371
Q14247	87
Q14498	2
Q14562	2
Q14676	1812
Q14739	601
Q14997	1397
Q15059	2
Q15149	187
Q15181	57
Q15185	1
Q15466	170
Q15651	33
Q15691	66
Q15746	608
Q15831	48
Q15843	48
Q16236	506
Q16236	538
Q16512	448
Q16531	1067
Q16543	240
Q16637	2
Q16665	12
Q16695	37
Q16720	363
Q16763	1
Q16777	96
Q16778	17
Q16822	624
Q2VY69	64
Q3SY84	147
Q3ZCT1	90
Q49A26	25
Q567U6	352
Q56NI9	111
Q5M775	970
Q5QNW6	17
Q5QNW6	35
Q5SSJ5	2
Q5SY16	2
Q5T9A4	427
Q5VVP1	1234
Q6K0P9	40
Q6NXT2	122
Q6NZI2	1
Q6P1J9	2
Q6PCB5	2
Q6PUV4	14
Q6S8J7	194
Q6UB35	174
Q6ULP2	745
Q6WRI0	471
Q6WRI0	516
Q6YP21	82
Q6ZN79	142
Q6ZRI6	152
Q7L1V2	1
Q7L4I2	2
Q7L576	1197
Q7RTS7	157
Q7Z3B3	104
Q7Z4G1	1
Q86SZ2	98
Q86UP3	1
Q86VF7	916
Q8IV01	337
Q8IVF2	2500
Q8IYD1	622
Q8IYH5	738
Q8N257	17
Q8N257	86
Q8N9W6	73
Q8NBQ5	70
Q8NBX0	2
Q8NEJ9	2
Q8NFJ9	2
Q8NGL9	302
Q8TCG1	820
Q8TF09	2
Q8WV41	382
Q8WYA6	91
Q8WYB5	1038
Q8WYL5	2
Q92526	295
Q92547	581
Q92608	1058
Q92613	32
Q92794	355
Q92831	416
Q92890	1
Q92922	359
Q92993	282
Q93079	17
Q93079	47
Q93079	86
Q969S9	233
Q96B01	326
Q96CN7	279
Q96DF8	1
Q96E39	1
Q96EI5	132
Q96F63	1
Q96GX9	94
Q96HJ9	40
Q96HS1	191
Q96HY7	148
Q96KB5	64
Q96KP4	2
Q96PB7	149
Q96PD2	410
Q96PE7	114
Q96PU5	2
Q99459	626
Q99471	2
Q99471	42
Q99612	218
Q99877	12
Q99877	13
Q99880	13
Q9BRR8	330
Q9BRR8	333
Q9BT78	25
Q9BTC0	1
Q9BY32	2
Q9BYB4	2
Q9BYJ0	174
Q9BYP7	443
Q9BYV1	270
Q9BZE1	127
Q9GZV4	68
Q9H0D6	796
Q9H1H9	277
Q9H2J4	1
Q9H2P0	1042
Q9H361	213
Q9H3R5	1
Q9H6R3	524
Q9H7E9	2
Q9H993	73
Q9HAF1	91
Q9HAT8	176
Q9HB71	118
Q9HC62	271
Q9HCG1	594
Q9NPB8	631
Q9NPF5	35
Q9NQV7	844
Q9NQW7	304
Q9NTJ3	679
Q9NTK5	216
Q9NUI1	151
Q9NUP7	2
Q9NVX2	2
Q9NWY4	233
Q9NX40	96
Q9NX46	109
Q9NY65	370
Q9NY65	401
Q9NZ01	22
Q9NZQ9	274
Q9NZT1	2
Q9P0P0	2
Q9UBI6	2
Q9UHD1	2
Q9UHJ6	2
Q9UHX1	454
Q9UII2	82
Q9UIJ7	181
Q9UJU2	95
Q9UJX3	263
Q9UL42	2
Q9UL46	2
Q9ULC4	51
Q9ULD4	449
Q9ULJ1	416
Q9ULX3	333
Q9UNF1	2
Q9UQB9	197
Q9Y224	20
Q9Y224	62
Q9Y241	2
Q9Y277	12
Q9Y284	2
Q9Y2H1	2
Q9Y2K2	1
Q9Y2W1	401
Q9Y3S2	289
Q9Y490	2115
Q9Y4W6	100
Q9Y530	2
Q9Y5B0	780
Q9Y5B9	337
Q9Y617	269

## Sheet: Glycosylation
P07358	551
A2RU67	237
O00206	205
O00206	282
O00206	624
O00533	767
O00748	111
O14773	222
O14773	286
O14773	443
O43291	57
O60494	1307
O60494	984
O60568	63
O75144	186
O75882	1250
O75882	300
O75882	731
O76024	500
O95297	50
O95342	122
O95497	130
O95998	147
P00450	397
P00450	762
P00451	601
P00742	221
P01008	167
P01008	224
P01011	127
P01024	1617
P01130	272
P01189	91
P01266	1365
P01570	95
P02679	334
P02724	45
P02751	1007
P02760	115
P02774	288
P02787	430
P02790	64
P02812	230
P04003	528
P04070	371
P04114	2239
P04114	3411
P04275	1231
P04275	2546
P04275	857
P04278	380
P04439	110
P04921	8
P05000	101
P05026	158
P05107	50
P05121	232
P05154	338
P05155	272
P05164	323
P05556	403
P05556	417
P05556	97
P06213	138
P06213	43
P06213	769
P06213	933
P06280	139
P06280	215
P06858	70
P06865	295
P07333	302
P07602	215
P07686	84
P07858	192
P07949	151
P08069	244
P08246	124
P08473	285
P08473	628
P08514	711
P08571	282
P08575	284
P09871	174
P10153	44
P10253	470
P10253	925
P10321	110
P10619	333
P10643	202
P10643	754
P10721	130
P10721	293
P10909	317
P11047	1395
P11279	45
P11597	358
P11717	1246
P11717	626
P12110	897
P12259	1559
P12318	178
P12319	165
P12821	74
P12821	942
P12830	622
P13473	275
P13612	645
P13671	162
P13688	378
P14410	855
P14410	99
P15151	105
P15289	350
P15813	38
P16070	57
P16471	233
P16671	321
P17181	172
P17405	520
P19022	572
P19440	344
P19823	96
P20160	126
P20160	171
P20774	258
P20851	71
P20916	106
P21589	403
P21860	414
P22303	381
P22304	115
P23229	930
P23229	966
P23229	997
P24043	1916
P24821	1018
P25311	109
P25311	128
P25445	118
P27487	281
P27487	520
P27487	685
P30443	110
P30531	184
P30939	10
P31785	84
P32927	191
P32942	363
P34059	204
P35354	580
P35542	94
P35916	527
P35968	143
P36888	473
P38398	909
P38398	913
P38398	916
P40189	379
P40199	197
P40199	224
P41180	488
P41180	90
P42261	406
P42785	415
P42785	47
P43251	349
P43251	402
P43308	104
P43652	33
P43652	383
P48067	237
P48357	347
P48960	406
P48960	453
P48960	454
P51797	432
P54709	241
P55058	94
P55085	30
P56373	194
P78363	98
P78509	305
P80108	659
Q01151	79
Q01151	86
Q02246	904
Q02985	205
Q04609	121
Q04609	140
Q04609	195
Q04609	459
Q07108	111
Q07108	163
Q07108	166
Q08722	111
Q12797	452
Q12841	175
Q13201	114
Q13219	725
Q13361	79
Q13510	259
Q13586	131
Q13740	91
Q14108	249
Q14108	304
Q14108	325
Q14112	1124
Q14542	48
Q14766	1366
Q14956	249
Q15223	202
Q16620	254
Q16620	338
Q16620	412
Q16706	1125
Q16853	294
Q495W5	443
Q4KMQ2	361
Q5JRA6	589
Q5VWK5	141
Q6P5S2	69
Q70UQ0	144
Q7Z2K6	730
Q86W47	53
Q8IWU5	198
Q8N4F0	293
Q8NBJ4	144
Q8TCT8	149
Q8TCT8	155
Q8WWI5	180
Q92186	134
Q92854	139
Q96D31	223
Q96F46	265
Q96FE5	274
Q96G97	88
Q96P16	294
Q96PQ1	385
Q99538	91
Q99572	187
Q99572	202
Q99572	241
Q99572	284
Q9BYF1	103
Q9BZQ6	195
Q9GZZ8	119
Q9H0X4	314
Q9H3G5	81
Q9H813	162
Q9HBX9	325
Q9HDC9	160
Q9NY35	42
Q9NZ08	154
Q9P232	489
Q9UBX1	367
Q9UBX1	378
Q9UGM5	37
Q9UIQ6	682
Q9UIQ6	850
Q9UMR5	60
Q9UNQ0	596
Q9Y345	358
Q9Y4L1	596
Q9Y5C1	296
Q9Y5L3	443
Q9Y624	185
Q9Y6M7	791
P12111	2322
Q05707	1523
O75056	84
O75056	91
P00748	308
P01133	954
P01233	147
P01233	158
P02724	66
P02730	162
P02810	33
P02810	38
P04040	254
P04275	1263
P04275	1486
P04280	40
P04637	149
P04921	24
P04921	42
P05787	15
P05787	475
P08670	55
P08709	120
P10124	100
P11171	792
P11279	209
P12883	1102
P13727	62
P16150	37
P16150	41
P16860	63
P18827	216
P23471	1549
P24592	144
P26842	127
P35658	1354
P40225	184
P40225	265
P47992	105
P49790	534
P68871	50
P68871	73
P69905	134
P69905	36
P80370	260
P98160	2995
Q12778	550
Q12830	1749
Q8WXI9	586
Q92563	383
Q96Q06	704
Q96T58	2530
Q99715	889
Q99715	981
Q99954	68
Q9HAU0	382
Q9UHG2	228
Q9UQ35	2236
O15431	27
O94811	155
P00748	328
P00750	96
P01042	557
P01106	58
P01374	41
P01563	129
P02686	232
P02724	23
P02724	52
P02749	149
P02751	2065
P02760	24
P02765	256
P02786	104
P02790	24
P04141	27
P04275	1255
P04921	31
P05155	48
P07498	151
P10451	143
P13473	196
P15382	7
P15941	924
P16150	137
P16150	22
P16150	46
P16860	62
P16860	74
P19823	675
P21583	180
P25445	28
P40225	131
P40225	180
P47992	100
P47992	106
P51610	779
P51693	215
P52948	567
P68871	85
Q02817	2524
Q02817	2887
Q02817	2938
Q02817	2963
Q02817	2979
Q02817	3025
Q02817	3035
Q02817	3369
Q02817	3455
Q12830	1753
Q12830	2103
Q12955	1624
Q14118	388
Q15848	22
Q8TAX7	176
Q8TAX7	291
Q9UPN6	614

## Sheet: Methylation
O00267	696
O14979	408
O75306	323
O95785	1162
P00403	82
P01241	96
P02489	21
P04637	110
P04637	209
P04637	213
P04637	335
P04637	337
P04637	370
P06400	860
P06746	152
P06746	83
P06899	47
P07305	155
P09651	194
P09651	218
P0C0S8	30
P0C0S8	75
P0C0S8	78
P11940	455
P11940	493
P14678	172
P15056	671
P15880	46
P16401	169
P16401	27
P16403	26
P16403	34
P16403	52
P17096	60
P22626	104
P22914	7
P29033	75
P35637	216
P35637	244
P35637	386
P35637	487
P39748	192
P42768	321
P46783	158
P48552	239
P48552	649
P49959	572
P49959	576
P49959	594
P51608	210
P53674	230
P61978	256
P61978	268
P61978	287
P62318	118
P62805	21
P62805	32
P62805	56
P62805	60
P62805	78
P62807	100
P62807	109
P62807	24
P68363	339
P68431	129
P68431	19
P68431	27
P68431	28
P68431	37
P68431	65
P68431	80
P68431	9
P78527	820
P84243	28
P84243	37
P98082	64
Q00839	779
Q01196	206
Q01196	210
Q01844	300
Q01844	309
Q01844	321
Q01844	330
Q01844	455
Q01844	471
Q01844	490
Q01844	503
Q01844	563
Q01844	572
Q01844	581
Q01844	592
Q01844	615
Q06787	546
Q07666	302
Q07666	304
Q07955	97
Q09472	580
Q09472	604
Q12962	191
Q13283	447
Q14524	513
Q14524	526
Q14524	680
Q15717	217
Q71U36	64
Q86U42	265
Q86U42	269
Q86U42	279
Q86U42	291
Q8N3U4	1066
Q8WWM7	361
Q92793	714
Q92793	742
Q92804	490
Q92997	212
Q93079	47
Q99729	245
Q9H1E3	218
Q9NR22	58
Q9UBK2	665
Q9UN86	424
Q9UQE7	427
Q9UQE7	72
Q9Y6Q9	1091

## Sheet: SUMOylation
O14647	702
O15151	254
O60315	866
O75533	413
P03372	268
P05067	670
P06748	263
P08069	1150
P14316	137
P14316	166
P35520	211
P37840	96
P40337	171
P41212	11
P49137	353
P54132	344
P60709	68
P62805	13
P63165	16
Q13133	328
Q13133	434
Q13426	210
Q14865	629
Q15054	433
Q5VWQ0	313
Q8N2W9	128
Q9C086	168
Q9H2X6	32
Q9NSC2	1086
Q9UHP3	141
Q9UK13	423
Q9Y2K1	328
Q9Y458	63
Q9Y6U3	299

## Sheet: Hydroxylation
O75636	53
P00740	110
P02747	57
P02747	93
P02747	96
P05997	1156
P07550	395
P11226	73
P12111	2322
P15502	427
P20908	1029
P20908	627
P20908	648
P20908	657
P20908	762
Q02388	2167
Q02388	2667
Q05707	1482
Q05707	1523
Q05707	1538
Q05707	1556
Q05707	1568
Q05707	1659
Q05707	1732
Q05707	1747
Q05707	1756
Q15485	77
Q15485	80
Q15848	91

## Sheet: Sulfation
P00451	1699
P00451	365
P00451	738
P00451	742
P32246	10
P51681	10
P51681	15
