# Supplementary material for: Nonsynonymous Single-Nucleotide Variations on Some Posttranslational Modifications of Human Proteins and the Association with Diseases
Source: Comput Math Methods Med. 2015 Oct 1;2015:124630. doi: 10.1155/2015/124630 (PMC4606098; doi:10.1155/2015/124630)
Supplement: Supplementary file 1 — Supplementary Table S1: The proteins and their sites of exact matched nsSNVs on each type of PTM. The proteins were shown with their UniProt Accession number. Supplementary Table S2: The information of damaged PTM sites associated diseases annotated by SwissVar. For each type of PTM, the information of associated diseases for the exact matched and around matched PTM sites were given. The alterations between the modified amino acids of one type of PTM marked in red. Supplementary Table S3: Enrichment results of keywords and GO. Both exact matched and ±2 matched results were shown. Inherited diseases were marked in yellow and cancers were marked in green. Supplementary Table S4: Pathway analysis based on IPA. The results were boxed for each type of PTM, and the analysis were performed for both inherited diseases and cancers. P value and the ratio calculated based on IPA were shown. Supplementary Table S5: Summary of biomarker candidates. The biomarker candidates were chosen based on information from IPA and details about them were shown. [file 124630.f1.zip › mat.124630.v2/Table S2.xlsx]

## Sheet: Phosphorylation
Phosphorylation EXACT MATCH									Phosphorylation(-7,+7) MATCH
	O14994	SYN3_HUMAN	patients affected by schizophrenia	D012559	VAR_068906	p.Ser470Asn				O00170	AIP_HUMAN	pituitary adenoma	VAR_043910	p.Lys241Glu
	O15055	PER2_HUMAN	advanced sleep phase syndrome, familial, 1	D020178	VAR_029080	p.Ser662Gly				O00217	NDUS8_HUMAN	leigh syndrome	VAR_019538	p.Pro79Leu
	O15360	FANCA_HUMAN	fanconi anemia	D005199	VAR_017498	p.Ser858Arg				O00255	MEN1_HUMAN	familial multiple endocrine neoplasia type i	VAR_039644	p.Pro545Ser
	O15527	OGG1_HUMAN	kidney cancer	D007680	VAR_024834	p.Ser232Thr				O00255	MEN1_HUMAN	familial multiple endocrine neoplasia type i	VAR_039645	p.Pro549Ser
	O15527	OGG1_HUMAN	kidney cancer	D007680	VAR_024834	p.Ser232Thr				O00305	CACB4_HUMAN	episodic ataxia 5	VAR_013669	p.Cys104Phe
	O43395	PRPF3_HUMAN	retinitis pigmentosa 18	D012174	VAR_016877	p.Thr494Met				O00571	DDX3X_HUMAN	breast cancer	VAR_035839	p.Arg294Thr
	O43602	DCX_HUMAN	lissencephaly, x-linked 1	D054221	VAR_007820	p.Ser128Arg				O00571	DDX3X_HUMAN	breast cancer	VAR_035839	p.Arg294Thr
	O43602	DCX_HUMAN	subcortical band heterotopia x-linked	D054221	VAR_007820	p.Ser128Arg				O14641	DVL2_HUMAN	renal cell carcinoma case	VAR_064708	p.Ile282Thr
	O75030	MITF_HUMAN	waardenburg syndrome 2a	D014849	VAR_010302	p.Ser405Pro				O14681	EI24_HUMAN	early onset breast cancer	VAR_065464	p.Thr319Ala
	O95278	EPM2A_HUMAN	epilepsy, progressive myoclonic 2	D020192	VAR_019465	p.Ser25Pro				O14746	TERT_HUMAN	idiopathic pulmonary fibrosis susceptibility	VAR_062543	p.Thr1110Met
	O95972	BMP15_HUMAN	ovarian dysgenesis 2	D016649	VAR_021195	p.Tyr235Cys				O14746	TERT_HUMAN	dyskeratosis congenita, autosomal dominant, 2	VAR_062544	p.Phe1127Leu
	O95999	BCL10_HUMAN	malt lymphoma	D018442	VAR_013219	p.Ser134Pro				O14746	TERT_HUMAN	dyskeratosis congenita, autosomal recessive, 4	VAR_068793	p.Pro704Ser
	O95999	BCL10_HUMAN	cancer	D009369	VAR_013225	p.Ser218Phe				O14746	TERT_HUMAN	pulmonary fibrosis, and/or bone marrow failure, telomere-related, 1	VAR_068795	p.Val791Ile
	P00439	PH4H_HUMAN	phenylketonuria	D010661	VAR_000869	p.Ser16Pro				O14773	TPP1_HUMAN	ceroid lipofuscinosis, neuronal, 2	VAR_063640	p.Pro202Leu
	P00533	EGFR_HUMAN	lung cancer	D008175	VAR_069502	p.Ser768Ile				O14773	TPP1_HUMAN	ceroid lipofuscinosis, neuronal, 2	VAR_009605	p.Arg206Cys
	P00966	ASSY_HUMAN	citrullinemia 1	D020159	VAR_000686	p.Ser180Asn				O14773	TPP1_HUMAN	ceroid lipofuscinosis, neuronal, 2	VAR_016792	p.Arg206His
	P01130	LDLR_HUMAN	familial hypercholesterolemia	D006938	VAR_005419	p.Tyr828Cys				O14936	CSKP_HUMAN	mental retardation and microcephaly with pontine and cerebellar hypoplasia	VAR_062997	p.Pro396Ser
	P02533	K1C14_HUMAN	epidermolysis bullosa simplex, dowling-meara type	D016110	VAR_010445	p.Tyr129Asp				O14958	CASQ2_HUMAN	ventricular tachycardia, catecholaminergic polymorphic, 2	VAR_016075	p.Asp307His
	P02533	K1C14_HUMAN	epidermolysis bullosa simplex, weber-cockayne type	D016110	VAR_031638	p.Tyr415Cys				O14965	AURKA_HUMAN	colorectal adenocarcinoma	VAR_041128	p.Ser155Arg
	P02533	K1C14_HUMAN	epidermolysis bullosa simplex, koebner type	D016110	VAR_003844	p.Tyr415His				O14994	SYN3_HUMAN	patients affected by schizophrenia	VAR_068906	p.Ser470Asn
	P02545	LMNA_HUMAN	emery-dreifuss muscular dystrophy 2, autosomal dominant	D020389	VAR_064968	p.Ser303Pro				O15055	PER2_HUMAN	advanced sleep phase syndrome, familial, 1	VAR_029080	p.Ser662Gly
	P04049	RAF1_HUMAN	noonan syndrome 5	D009634	VAR_037808	p.Ser257Leu				O15075	DCLK1_HUMAN	gastric adenocarcinoma	VAR_045673	p.Gly29Cys
	P04049	RAF1_HUMAN	leopard syndrome 2	D044542	VAR_037808	p.Ser257Leu				O15146	MUSK_HUMAN	lung neuroendocrine carcinoma	VAR_041758	p.Asn819Ser
	P04049	RAF1_HUMAN	noonan syndrome 5	D009634	VAR_037809	p.Ser259Phe				O15160	RPAC1_HUMAN	treacher collins syndrome 3	VAR_064899	p.Arg279Gln
	P04049	RAF1_HUMAN	hypertrophic cardiomyopathy	D002312	VAR_037810	p.Thr260Ile				O15160	RPAC1_HUMAN	treacher collins syndrome 3	VAR_064900	p.Arg279Trp
	P04049	RAF1_HUMAN	noonan syndrome 5	D009634	VAR_037811	p.Thr260Arg				O15239	NDUA1_HUMAN	colorectal cancer	VAR_036173	p.Arg53Cys
	P04049	RAF1_HUMAN	noonan syndrome 5	D009634	VAR_037818	p.Thr491Ile				O15259	NPHP1_HUMAN	nephronophthisis 1	VAR_012160	p.Gly342Arg
	P04049	RAF1_HUMAN	noonan syndrome 5	D009634	VAR_037819	p.Thr491Arg				O15270	SPTC2_HUMAN	neuropathy, hereditary sensory and autonomic, 1c	VAR_064799	p.Gly382Val
	P04049	RAF1_HUMAN	noonan syndrome 5	D009634	VAR_037820	p.Ser612Thr				O15273	TELT_HUMAN	cardiomyopathy, familial hypertrophic	VAR_029448	p.Arg153His
	P04062	GLCM_HUMAN	gaucher disease	D005776	VAR_003315	p.Tyr451His				O15360	FANCA_HUMAN	fanconi anemia	VAR_038015	p.Tyr843Asp
	P04180	LCAT_HUMAN	lecithin-cholesterol acyltransferase deficiency	D007863	VAR_039030	p.Ser205Asn				O15360	FANCA_HUMAN	fanconi anemia	VAR_009648	p.Leu845Pro
	P04264	K2C1_HUMAN	epidermolytic hyperkeratosis	D017488	VAR_003857	p.Ser193Pro				O15360	FANCA_HUMAN	fanconi anemia	VAR_017498	p.Ser858Arg
	P04637	P53_HUMAN	sporadic cancers	D009369	VAR_005893	p.Ser149Pro				O15520	FGF10_HUMAN	lacrimo-auriculo-dento-digital syndrome	VAR_029889	p.Ile156Arg
	P04637	P53_HUMAN	sporadic cancers	D009369	VAR_044811	p.Ser149Thr				O15527	OGG1_HUMAN	kidney cancer	VAR_024834	p.Ser232Thr
	P04637	P53_HUMAN	sporadic cancers	D009369	VAR_044810	p.Ser149Phe				O15527	OGG1_HUMAN	kidney cancer	VAR_024834	p.Ser232Thr
	P04637	P53_HUMAN	sporadic cancer	D009369	VAR_044549	p.Ser15Arg				O15534	PER1_HUMAN	breast cancer	VAR_036038	p.Glu696Gln
	P04637	P53_HUMAN	sporadic cancers	D009369	VAR_044814	p.Thr150Lys				O15534	PER1_HUMAN	breast cancer	VAR_036039	p.Asn985Ser
	P04637	P53_HUMAN	sporadic cancers	D009369	VAR_044813	p.Thr150Ile				O15537	XLRS1_HUMAN	retinoschisis juvenile x-linked 1	VAR_008184	p.Arg102Trp
	P04637	P53_HUMAN	sporadic cancer	D009369	VAR_044817	p.Thr150Arg				O15537	XLRS1_HUMAN	retinoschisis juvenile x-linked 1	VAR_008217	p.Arg102Gln
	P04637	P53_HUMAN	sporadic cancer	D009369	VAR_044816	p.Thr150Pro				O15537	XLRS1_HUMAN	retinoschisis juvenile x-linked 1	VAR_008218	p.Leu103Arg
	P04637	P53_HUMAN	sporadic cancer	D009369	VAR_044815	p.Thr150Asn				O15537	XLRS1_HUMAN	retinoschisis juvenile x-linked 1	VAR_008219	p.Phe108Cys
	P04637	P53_HUMAN	sporadic cancer	D009369	VAR_044812	p.Thr150Ala				O15537	XLRS1_HUMAN	retinoschisis juvenile x-linked 1	VAR_008185	p.Gly109Arg
	P04637	P53_HUMAN	sporadic cancers	D009369	VAR_044834	p.Thr155Ile				O15537	XLRS1_HUMAN	retinoschisis juvenile x-linked 1	VAR_008220	p.Gly109Glu
	P04637	P53_HUMAN	sporadic cancers	D009369	VAR_005901	p.Thr155Ala				O15537	XLRS1_HUMAN	retinoschisis juvenile x-linked 1	VAR_008221	p.Gly109Trp
	P04637	P53_HUMAN	sporadic cancers	D009369	VAR_044838	p.Thr155Ser				O15537	XLRS1_HUMAN	retinoschisis juvenile x-linked 1	VAR_008222	p.Cys110Tyr
	P04637	P53_HUMAN	sporadic cancers	D009369	VAR_044837	p.Thr155Pro				O15537	XLRS1_HUMAN	retinoschisis juvenile x-linked 1	VAR_008223	p.Trp112Cys
	P04637	P53_HUMAN	sporadic cancer	D009369	VAR_044835	p.Thr155Met				O15537	XLRS1_HUMAN	retinoschisis juvenile x-linked 1	VAR_008224	p.Leu113Phe
	P04637	P53_HUMAN	li-fraumeni syndrome	D016864	VAR_044836	p.Thr155Asn				O15537	XLRS1_HUMAN	retinoschisis juvenile x-linked 1	VAR_008241	p.Gly178Asp
	P04637	P53_HUMAN	sporadic cancers	D009369	VAR_044954	p.Ser183Pro				O15537	XLRS1_HUMAN	retinoschisis juvenile x-linked 1	VAR_008242	p.Arg182Cys
	P04637	P53_HUMAN	sporadic cancers	D009369	VAR_044953	p.Ser183Leu				O15537	XLRS1_HUMAN	retinoschisis juvenile x-linked 1	VAR_008216	p.Ala98Glu
	P04637	P53_HUMAN	sporadic cancers	D009369	VAR_045075	p.Thr211Ile				O15550	KDM6A_HUMAN	chronic myelomonocytic leukemia	VAR_067226	p.Glu834Asp
	P04637	P53_HUMAN	sporadic cancers	D009369	VAR_045078	p.Thr211Ser				O43175	SERA_HUMAN	phosphoglycerate dehydrogenase deficiency	VAR_059028	p.Ala373Thr
	P04637	P53_HUMAN	sporadic cancers	D009369	VAR_045074	p.Thr211Ala				O43175	SERA_HUMAN	phosphoglycerate dehydrogenase deficiency	VAR_059029	p.Gly377Ser
	P04637	P53_HUMAN	sporadic cancers	D009369	VAR_045076	p.Thr211Asn				O43395	PRPF3_HUMAN	retinitis pigmentosa 18	VAR_046735	p.Pro493Ser
	P04637	P53_HUMAN	sporadic cancer	D009369	VAR_045077	p.Thr211Pro				O43395	PRPF3_HUMAN	retinitis pigmentosa 18	VAR_016877	p.Thr494Met
	P04637	P53_HUMAN	sporadic cancers	D009369	VAR_045092	p.Ser215Gly				O43464	HTRA2_HUMAN	parkinson disease 13	VAR_027350	p.Gly399Ser
	P04637	P53_HUMAN	sporadic cancers	D009369	VAR_045095	p.Ser215Arg				O43511	S26A4_HUMAN	deafness, autosomal recessive, 4	VAR_007448	p.Thr721Met
	P04637	P53_HUMAN	sporadic cancers	D009369	VAR_045093	p.Ser215Ile				O43511	S26A4_HUMAN	pendred syndrome	VAR_007448	p.Thr721Met
	P04637	P53_HUMAN	sporadic cancers	D009369	VAR_045810	p.Ser215Lys				O43511	S26A4_HUMAN	deafness, autosomal recessive, 4	VAR_007449	p.His723Arg
	P04637	P53_HUMAN	sporadic cancers	D009369	VAR_045096	p.Ser215Thr				O43511	S26A4_HUMAN	pendred syndrome	VAR_007449	p.His723Arg
	P04637	P53_HUMAN	sporadic cancers	D009369	VAR_045091	p.Ser215Cys				O43511	S26A4_HUMAN	pendred syndrome	VAR_021681	p.Asp724Asn
	P04637	P53_HUMAN	sporadic cancers	D009369	VAR_045094	p.Ser215Asn				O43526	KCNQ2_HUMAN	epileptic encephalopathy, early infantile, 7	VAR_026993	p.Lys554Asn
	P04637	P53_HUMAN	sporadic cancers	D009369	VAR_045336	p.Ser269Cys				O43526	KCNQ2_HUMAN	seizures, benign familial neonatal 1	VAR_026993	p.Lys554Asn
	P04637	P53_HUMAN	sporadic cancers	D009369	VAR_045337	p.Ser269Gly				O43602	DCX_HUMAN	lissencephaly, x-linked 1	VAR_026022	p.Thr123Ile
	P04637	P53_HUMAN	sporadic cancers	D009369	VAR_045338	p.Ser269Asn				O43602	DCX_HUMAN	lissencephaly, x-linked 1	VAR_007819	p.Leu124Ser
	P04637	P53_HUMAN	sporadic cancers	D009369	VAR_045339	p.Ser269Arg				O43602	DCX_HUMAN	lissencephaly, x-linked 1	VAR_007820	p.Ser128Arg
	P04637	P53_HUMAN	sporadic cancer	D009369	VAR_047198	p.Ser269Ile				O43602	DCX_HUMAN	subcortical band heterotopia x-linked	VAR_007820	p.Ser128Arg
	P04637	P53_HUMAN	sporadic cancer	D009369	VAR_045340	p.Ser269Thr				O43602	DCX_HUMAN	subcortical band heterotopia x-linked	VAR_026023	p.Lys131Asn
	P04637	P53_HUMAN	sporadic cancers	D009369	VAR_045391	p.Thr284Lys				O43602	DCX_HUMAN	subcortical band heterotopia x-linked	VAR_026025	p.Gly148Glu
	P04637	P53_HUMAN	sporadic cancers	D009369	VAR_006021	p.Thr284Ala				O43602	DCX_HUMAN	lissencephaly, x-linked 1	VAR_026026	p.Ala152Ser
	P04637	P53_HUMAN	sporadic cancers	D009369	VAR_006022	p.Thr284Pro				O43602	DCX_HUMAN	subcortical band heterotopia x-linked	VAR_007834	p.Asn281Lys
	P04637	P53_HUMAN	sporadic cancers	D009369	VAR_045390	p.Thr284Ile				O43602	DCX_HUMAN	subcortical band heterotopia x-linked	VAR_026033	p.Asn281Ile
	P04637	P53_HUMAN	sporadic cancers	D009369	VAR_045487	p.Thr312Ile				O43602	DCX_HUMAN	lissencephaly, x-linked 1	VAR_007835	p.Thr284Arg
	P04637	P53_HUMAN	sporadic cancers	D009369	VAR_045488	p.Thr312Ser				O43602	DCX_HUMAN	subcortical band heterotopia x-linked	VAR_007835	p.Thr284Arg
	P04637	P53_HUMAN	sporadic cancer	D009369	VAR_045492	p.Ser313Arg				O43602	DCX_HUMAN	subcortical band heterotopia x-linked	VAR_026034	p.Thr284Ala
	P04637	P53_HUMAN	sporadic cancer	D009369	VAR_045491	p.Ser313Asn				O43683	BUB1_HUMAN	colorectal cancer	VAR_008851	p.Pro648Arg
	P04637	P53_HUMAN	sporadic cancer	D009369	VAR_045489	p.Ser313Cys				O43707	ACTN4_HUMAN	focal segmental glomerulosclerosis 1	VAR_010379	p.Thr259Ile
	P04637	P53_HUMAN	sporadic cancer	D009369	VAR_045490	p.Ser313Ile				O43707	ACTN4_HUMAN	focal segmental glomerulosclerosis 1	VAR_010380	p.Ser262Pro
	P04637	P53_HUMAN	sporadic cancer	D009369	VAR_045493	p.Ser314Phe				O60216	RAD21_HUMAN	cornelia de lange syndrome 4	VAR_068691	p.Pro376Arg
	P04637	P53_HUMAN	sporadic cancer	D009369	VAR_045495	p.Ser315Phe				O60260	PRKN2_HUMAN	parkinson disease 2	VAR_019755	p.Cys289Gly
	P04637	P53_HUMAN	sporadic cancer	D009369	VAR_045496	p.Ser315Pro				O60260	PRKN2_HUMAN	parkinson disease	VAR_062673	p.Ala371Thr
	P04637	P53_HUMAN	sporadic cancer	D009369	VAR_045494	p.Ser315Cys				O60313	OPA1_HUMAN	optic atrophy 1	VAR_060828	p.Tyr102Cys
	P04637	P53_HUMAN	sporadic cancer	D009369	VAR_044555	p.Ser33Thr				O60313	OPA1_HUMAN	optic atrophy 1	VAR_060836	p.Ala357Thr
	P04637	P53_HUMAN	sporadic cancer	D009369	VAR_044559	p.Ser37Thr				O60313	OPA1_HUMAN	optic atrophy 1	VAR_060866	p.Leu887Pro
	P04637	P53_HUMAN	sporadic cancer	D009369	VAR_044558	p.Ser37Pro				O60313	OPA1_HUMAN	optic atrophy 1	VAR_060868	p.Arg932Cys
	P04637	P53_HUMAN	sporadic cancer	D009369	VAR_045571	p.Ser376Thr				O60333	KIF1B_HUMAN	pheochromocytoma	VAR_063538	p.Glu1674Lys
	P04637	P53_HUMAN	sporadic cancer	D009369	VAR_045570	p.Ser376Ala				O60488	ACSL4_HUMAN	colorectal cancer	VAR_036376	p.Arg133Cys
	P04637	P53_HUMAN	sporadic cancers	D009369	VAR_044568	p.Ser46Pro				O60566	BUB1B_HUMAN	mosaic variegated aneuploidy syndrome 1	VAR_028928	p.Leu1012Pro
	P04637	P53_HUMAN	sporadic cancers	D009369	VAR_044567	p.Ser46Phe				O60566	BUB1B_HUMAN	mosaic variegated aneuploidy syndrome 1	VAR_028923	p.Arg550Gln
	P04637	P53_HUMAN	sporadic cancers	D009369	VAR_044620	p.Thr81Ile				O60566	BUB1B_HUMAN	colorectal cancer	VAR_008854	p.Val618Ala
	P04637	P53_HUMAN	sporadic cancers	D009369	VAR_044653	p.Ser99Phe				O60733	PLPL9_HUMAN	neurodegeneration with brain iron accumulation 2b	VAR_029372	p.Lys545Thr
	P04637	P53_HUMAN	sporadic cancer	D009369	VAR_044654	p.Ser99Pro				O60880	SH21A_HUMAN	lymphoproliferative syndrome, x-linked, 1	VAR_005614	p.Pro101Leu
	P04792	HSPB1_HUMAN	charcot-marie-tooth disease 2f	D002607	VAR_018507	p.Ser135Phe				O60880	SH21A_HUMAN	lymphoproliferative syndrome, x-linked, 1	VAR_048020	p.Val102Gly
	P04792	HSPB1_HUMAN	neuronopathy, distal hereditary motor, 2b	D009134	VAR_018507	p.Ser135Phe				O60880	SH21A_HUMAN	lymphoproliferative syndrome, x-linked, 1	VAR_048019	p.Gln99Pro
	P06276	CHLE_HUMAN	butyrylcholinesterase deficiency		VAR_040024	p.Ser226Gly				O75030	MITF_HUMAN	waardenburg syndrome 2a	VAR_010302	p.Ser405Pro
	P06400	RB_HUMAN	childhood cancer retinoblastoma	D012175	VAR_005579	p.Ser567Leu				O75140	DEPD5_HUMAN	epilepsy, familial focal, with variable foci	VAR_069263	p.Ala452Val
	P07949	RET_HUMAN	hirschsprung disease 1	D006627	VAR_067124	p.Tyr1062Cys				O75251	NDUS7_HUMAN	mitochondrial complex i deficiency	VAR_008848	p.Val122Met
	P07949	RET_HUMAN	hirschsprung disease 1	D006627	VAR_009483	p.Tyr791Phe				O75340	PDCD6_HUMAN	breast cancer	VAR_035459	p.Gly123Cys
	P07949	RET_HUMAN	medullary thyroid carcinoma	D018276	VAR_009483	p.Tyr791Phe				O75340	PDCD6_HUMAN	breast cancer	VAR_035459	p.Gly123Cys
	P07949	RET_HUMAN	pheochromocytoma	D010673	VAR_009483	p.Tyr791Phe				O75342	LX12B_HUMAN	ichthyosis, congenital, autosomal recessive 2	VAR_069545	p.Leu24Pro
	P07949	RET_HUMAN	multiple neoplasia 2a	D018813	VAR_009483	p.Tyr791Phe				O75362	ZN217_HUMAN	colorectal cancer	VAR_035572	p.Asp323Asn
	P07949	RET_HUMAN	medullary thyroid carcinoma	D018276	VAR_009486	p.Ser891Ala				O75369	FLNB_HUMAN	larsen syndrome	VAR_033081	p.Leu1431Arg
	P08559	ODPA_HUMAN	pyruvate dehydrogenase e1-alpha deficiency	D015325	VAR_004957	p.Thr231Ala				O75369	FLNB_HUMAN	breast cancer	VAR_035920	p.Ala1534Gly
	P08559	ODPA_HUMAN	pyruvate dehydrogenase e1-alpha deficiency	D015325	VAR_004957	p.Thr231Ala				O75369	FLNB_HUMAN	larsen syndrome	VAR_033083	p.Gly1586Arg
	P08559	ODPA_HUMAN	pyruvate dehydrogenase e1-alpha deficiency	D015325	VAR_004957	p.Thr231Ala				O75369	FLNB_HUMAN	larsen syndrome	VAR_033085	p.Pro1603Leu
	P08559	ODPA_HUMAN	pyruvate dehydrogenase e1-alpha deficiency	D015325	VAR_004957	p.Thr231Ala				O75369	FLNB_HUMAN	larsen syndrome	VAR_033086	p.Gly1691Ser
	P08559	ODPA_HUMAN	pyruvate dehydrogenase e1-alpha deficiency	D015325	VAR_004957	p.Thr231Ala				O75369	FLNB_HUMAN	breast cancer	VAR_035917	p.Arg566Gln
	P08559	ODPA_HUMAN	pyruvate dehydrogenase e1-alpha deficiency	D015325	VAR_004957	p.Thr231Ala				O75369	FLNB_HUMAN	breast cancer	VAR_035918	p.Asn663Lys
	P08559	ODPA_HUMAN	pyruvate dehydrogenase e1-alpha deficiency	D015325	VAR_004957	p.Thr231Ala				O75369	FLNB_HUMAN	breast cancer	VAR_035919	p.Thr703Lys
	P08559	ODPA_HUMAN	pyruvate dehydrogenase e1-alpha deficiency	D015325	VAR_004957	p.Thr231Ala				O75398	DEAF1_HUMAN	primary colorectal cancer	VAR_013725	p.Glu186Val
	P08559	ODPA_HUMAN	pyruvate dehydrogenase e1-alpha deficiency	D015325	VAR_004957	p.Thr231Ala				O75445	USH2A_HUMAN	usher syndrome 2a	VAR_054568	p.Arg464Cys
	P08559	ODPA_HUMAN	pyruvate dehydrogenase e1-alpha deficiency	D015325	VAR_004957	p.Thr231Ala				O75445	USH2A_HUMAN	retinitis pigmentosa 39	VAR_025768	p.Glu478Asp
	P08559	ODPA_HUMAN	pyruvate dehydrogenase e1-alpha deficiency	D015325	VAR_004957	p.Thr231Ala				O75445	USH2A_HUMAN	usher syndrome 2a	VAR_025768	p.Glu478Asp
	P08581	MET_HUMAN	renal cell carcinoma papillary	D002292	VAR_006292	p.Tyr1230Cys				O75792	RNH2A_HUMAN	aicardi-goutieres syndrome 4	VAR_070625	p.Arg108Trp
	P08581	MET_HUMAN	renal cell carcinoma papillary	D002292	VAR_032491	p.Tyr1230Asp				O75844	FACE1_HUMAN	mandibuloacral dysplasia with type b lipodystrophy	VAR_064501	p.Pro248Leu
	P08581	MET_HUMAN	renal cell carcinoma papillary	D002292	VAR_006293	p.Tyr1230His				O75874	IDHC_HUMAN	glioma	VAR_036013	p.Arg132Cys
	P08581	MET_HUMAN	case of cancer of unknown primary origin	D005335	VAR_032484	p.Thr992Ile				O75874	IDHC_HUMAN	glioma	VAR_055454	p.Arg132Gly
	P09619	PGFRB_HUMAN	gastric adenocarcinoma	D000230	VAR_042029	p.Tyr589His				O75874	IDHC_HUMAN	glioma	VAR_055455	p.Arg132His
	P10275	ANDR_HUMAN	prostate cancer	D011471	VAR_009824	p.Ser791Pro				O75874	IDHC_HUMAN	glioma	VAR_055456	p.Arg132Leu
	P11498	PYC_HUMAN	pyruvate carboxylase deficiency	D015324	VAR_058959	p.Tyr304Cys				O75874	IDHC_HUMAN	glioma	VAR_055457	p.Arg132Ser
	P12830	CADH1_HUMAN	ovarian carcinoma	D002277	VAR_001322	p.Ser838Gly				O75914	PAK3_HUMAN	colorectal adenocarcinoma	VAR_046764	p.Thr440Ser
	P12883	MYH7_HUMAN	myopathy, distal, 1	D049310	VAR_042785	p.Thr441Met				O75923	DYSF_HUMAN	limb-girdle muscular dystrophy 2b	VAR_024853	p.Ala170Glu
	P13569	CFTR_HUMAN	cystic fibrosis	D003550	VAR_000177	p.Ser549Ile				O75923	DYSF_HUMAN	miyoshi muscular dystrophy 1	VAR_024853	p.Ala170Glu
	P13569	CFTR_HUMAN	cystic fibrosis	D003550	VAR_000178	p.Ser549Arg				O76024	WFS1_HUMAN	wolfram syndrome 1	VAR_029505	p.Arg629Trp
	P13569	CFTR_HUMAN	cystic fibrosis	D003550	VAR_000176	p.Ser549Asn				O76024	WFS1_HUMAN	deafness, autosomal dominant, 6	VAR_032963	p.Lys634Thr
	P13645	K1C10_HUMAN	epidermolytic hyperkeratosis	D017488	VAR_003831	p.Tyr160Asp				O76039	CDKL5_HUMAN	epileptic encephalopathy, early infantile, 2	VAR_023561	p.Arg175Ser
	P13645	K1C10_HUMAN	epidermolytic hyperkeratosis	D017488	VAR_010509	p.Tyr160Ser				O76039	CDKL5_HUMAN	epileptic encephalopathy, early infantile, 2	VAR_058026	p.Arg178Pro
	P13645	K1C10_HUMAN	epidermolytic hyperkeratosis	D017488	VAR_010508	p.Tyr160Asn				O76039	CDKL5_HUMAN	epileptic encephalopathy, early infantile, 2	VAR_037635	p.Pro180Leu
	P13647	K2C5_HUMAN	epidermolysis bullosa simplex, dowling-meara type	D016110	VAR_010459	p.Ser181Pro				O76039	CDKL5_HUMAN	epileptic encephalopathy, early infantile, 2	VAR_058028	p.Thr288Ile
	P14859	PO2F1_HUMAN	breast cancer	D001943	VAR_035816	p.Ser88Phe				O76039	CDKL5_HUMAN	epileptic encephalopathy, early infantile, 2	VAR_058029	p.Cys291Tyr
	P15056	BRAF_HUMAN	cardiofaciocutaneous syndrome 1		VAR_058628	p.Thr599Arg				O76039	CDKL5_HUMAN	colorectal cancer	VAR_036578	p.Asn368His
	P15531	NDKA_HUMAN	neuroblastoma	D009447	VAR_004625	p.Ser120Gly				O76039	CDKL5_HUMAN	metastatic melanoma	VAR_041997	p.Ala374Thr
	P15924	DESP_HUMAN	arrhythmogenic right ventricular dysplasia, familial, 8	D019571	VAR_015402	p.Ser299Arg				O76039	CDKL5_HUMAN	epileptic encephalopathy, early infantile, 2	VAR_058032	p.Val718Met
	P16234	PGFRA_HUMAN	hypereosinophilic syndrome	D017681	VAR_066475	p.Tyr849Ser				O76082	S22A5_HUMAN	systemic primary carnitine deficiency	VAR_064151	p.Arg488Cys
	P16234	PGFRA_HUMAN	gastrointestinal stromal tumor	D046152	VAR_066474	p.Tyr849Cys				O76082	S22A5_HUMAN	systemic primary carnitine deficiency	VAR_066846	p.Arg488His
	P17302	CXA1_HUMAN	congenital heart malformations	D006330	VAR_059011	p.Ser251Thr				O76090	BEST1_HUMAN	vitelliform macular dystrophy 2	VAR_017379	p.Asn133Lys
	P17302	CXA1_HUMAN	congenital heart malformations	D006330	VAR_014102	p.Thr290Asn				O76090	BEST1_HUMAN	vitelliform macular dystrophy 2	VAR_010478	p.Gly135Ser
	P17302	CXA1_HUMAN	heart malformations	D006330	VAR_059016	p.Ser365Asn				O76090	BEST1_HUMAN	bestrophinopathy, autosomal recessive	VAR_000847	p.Arg141His
	P17661	DESM_HUMAN	myopathy, myofibrillar, 1	D019571	VAR_067208	p.Ser13Phe				O76090	BEST1_HUMAN	vitelliform macular dystrophy 2	VAR_000847	p.Arg141His
	P19429	TNNI3_HUMAN	cardiomyopathy, familial hypertrophic 7	D024741	VAR_029454	p.Ser166Phe				O76090	BEST1_HUMAN	adult-onset vitelliform macular dystrophy	VAR_010479	p.Ala146Lys
	P21359	NF1_HUMAN	neurofibromatosis 1	D009456	VAR_021766	p.Thr2507Ile				O76090	BEST1_HUMAN	bestrophinopathy, autosomal recessive	VAR_043493	p.Pro152Ala
	P21802	FGFR2_HUMAN	crouzon syndrome	D003394	VAR_004142	p.Ser347Cys				O95140	MFN2_HUMAN	charcot-marie-tooth disease 2a2	VAR_018607	p.Val69Phe
	P21817	RYR1_HUMAN	central core disease of muscle	D020512	VAR_045765	p.Tyr4864Cys				O95140	MFN2_HUMAN	charcot-marie-tooth disease 2a2	VAR_018608	p.Leu76Pro
	P22033	MUTA_HUMAN	methylmalonic aciduria type mut		VAR_004413	p.Tyr231Asn				O95180	CAC1H_HUMAN	epilepsy, childhood absence 6	VAR_045947	p.Gly784Ser
	P24530	EDNRB_HUMAN	hirschsprung disease 2	D006627	VAR_003472	p.Ser305Asn				O95255	MRP6_HUMAN	pseudoxanthoma elasticum	VAR_013387	p.Ala1303Pro
	P25054	APC_HUMAN	familial adenomatous polyposis	D011125	VAR_005056	p.Ser2621Cys				O95255	MRP6_HUMAN	arterial calcification of infancy, generalized, 2	VAR_011495	p.Arg1314Trp
	P25054	APC_HUMAN	familial adenomatous polyposis	D011125	VAR_009614	p.Ser722Gly				O95255	MRP6_HUMAN	pseudoxanthoma elasticum	VAR_011495	p.Arg1314Trp
	P25445	TNR6_HUMAN	non-hodgkin lymphoma	D008228	VAR_013422	p.Thr198Ile				O95255	MRP6_HUMAN	pseudoxanthoma elasticum	VAR_013388	p.Arg1314Gln
	P25445	TNR6_HUMAN	autoimmune lymphoproliferative syndrome 1a	D056735	VAR_013423	p.Tyr232Cys				O95255	MRP6_HUMAN	pseudoxanthoma elasticum	VAR_067864	p.Leu677Pro
	P25963	IKBA_HUMAN	ectodermal dysplasia, anhidrotic, with t-cell immunodeficiency autosomal dominant	D053360	VAR_034871	p.Ser32Ile				O95278	EPM2A_HUMAN	epilepsy, progressive myoclonic 2	VAR_019465	p.Ser25Pro
	P29317	EPHA2_HUMAN	cataract 6, multiple types		VAR_058907	p.Thr940Ile				O95278	EPM2A_HUMAN	epilepsy, progressive myoclonic 2	VAR_019466	p.Glu28Lys
	P31327	CPSM_HUMAN	carbamoyl phosphate synthetase 1 deficiency	D020165	VAR_006835	p.Thr544Met				O95278	EPM2A_HUMAN	epilepsy, progressive myoclonic 2	VAR_019467	p.Trp32Gly
	P31327	CPSM_HUMAN	carbamoyl phosphate synthetase 1 deficiency	D020165	VAR_066154	p.Ser913Leu				O95278	EPM2A_HUMAN	epilepsy, progressive myoclonic 2	VAR_019469	p.Phe84Leu
	P32004	L1CAM_HUMAN	hydrocephalus	D006849	VAR_003947	p.Ser1194Leu				O95278	EPM2A_HUMAN	epilepsy, progressive myoclonic 2	VAR_019470	p.Phe88Leu
	P32004	L1CAM_HUMAN	mental retardation, aphasia, shuffling gait, and adducted thumbs syndrome	D015419	VAR_003947	p.Ser1194Leu				O95278	EPM2A_HUMAN	epilepsy, progressive myoclonic 2	VAR_019471	p.Arg91Pro
	P32004	L1CAM_HUMAN	hydrocephalus	D006849	VAR_003948	p.Ser1224Leu				O95382	M3K6_HUMAN	ovarian endometrioid cancer	VAR_046055	p.Thr968Ile
	P35222	CTNB1_HUMAN	hepatocellular carcinoma	D006528	VAR_017612	p.Ser23Arg				O95409	ZIC2_HUMAN	holoprosencephaly 5	VAR_058594	p.Ser272Asn
	P35222	CTNB1_HUMAN	hepatocellular carcinoma	D006528	VAR_017618	p.Ser33Leu				O95477	ABCA1_HUMAN	high density lipoprotein deficiency 1	VAR_012627	p.Ala1046Asp
	P35222	CTNB1_HUMAN	colorectal cancer	D015179	VAR_017619	p.Ser33Tyr				O95477	ABCA1_HUMAN	high density lipoprotein deficiency 1	VAR_009152	p.Asp1289Asn
	P35222	CTNB1_HUMAN	pilomatrixoma	D018296	VAR_017617	p.Ser33Phe				O95631	NET1_HUMAN	neuroblastoma	VAR_014280	p.Lys489Glu
	P35222	CTNB1_HUMAN	pilomatrixoma	D018296	VAR_017619	p.Ser33Tyr				O95678	K2C75_HUMAN	loose anagen hair syndrome	VAR_038104	p.Glu337Lys
	P35222	CTNB1_HUMAN	medulloblastoma	D008527	VAR_017617	p.Ser33Phe				O95718	ERR2_HUMAN	deafness, autosomal recessive, 35	VAR_043506	p.Leu347Pro
	P35222	CTNB1_HUMAN	hepatocellular carcinoma	D006528	VAR_017627	p.Ser37Tyr				O95718	ERR2_HUMAN	deafness, autosomal recessive, 35	VAR_043508	p.Thr389Met
	P35222	CTNB1_HUMAN	pilomatrixoma	D018296	VAR_017625	p.Ser37Cys				O95747	OXSR1_HUMAN	metastatic melanoma	VAR_040969	p.Pro433Ser
	P35222	CTNB1_HUMAN	pilomatrixoma	D018296	VAR_017626	p.Ser37Phe				O95747	OXSR1_HUMAN	metastatic melanoma	VAR_040969	p.Pro433Ser
	P35222	CTNB1_HUMAN	medulloblastoma	D008527	VAR_017624	p.Ser37Ala				O95817	BAG3_HUMAN	myopathy, myofibrillar, 6	VAR_063089	p.Pro209Leu
	P35222	CTNB1_HUMAN	ovarian cancer	D010051	VAR_017625	p.Ser37Cys				O95817	BAG3_HUMAN	cardiomyopathy, dilated 1hh	VAR_066785	p.Glu455Lys
	P35222	CTNB1_HUMAN	hepatoblastoma	D018197	VAR_017629	p.Thr41Ala				O95817	BAG3_HUMAN	cardiomyopathy, dilated 1hh	VAR_066786	p.Leu462Pro
	P35222	CTNB1_HUMAN	hepatocellular carcinoma	D006528	VAR_017629	p.Thr41Ala				O95835	LATS1_HUMAN	lung adenocarcinoma	VAR_040666	p.Met669Ile
	P35222	CTNB1_HUMAN	pilomatrixoma	D018296	VAR_017630	p.Thr41Ile				O95970	LGI1_HUMAN	epilepsy, familial temporal lobe, 1	VAR_015771	p.Leu26Arg
	P35222	CTNB1_HUMAN	ovarian cancer	D010051	VAR_017630	p.Thr41Ile				O95972	BMP15_HUMAN	ovarian dysgenesis 2	VAR_021195	p.Tyr235Cys
	P35222	CTNB1_HUMAN	hepatocellular carcinoma	D006528	VAR_017632	p.Ser45Pro				O95999	BCL10_HUMAN	malt lymphoma	VAR_013219	p.Ser134Pro
	P35222	CTNB1_HUMAN	hepatocellular carcinoma	D006528	VAR_017631	p.Ser45Phe				O95999	BCL10_HUMAN	malt lymphoma	VAR_013221	p.Thr168Ala
	P35520	CBS_HUMAN	cystathionine beta-synthase deficiency	D006712	VAR_008068	p.Thr191Met				O95999	BCL10_HUMAN	malt lymphoma	VAR_013222	p.Leu174Ser
	P36871	PGM1_HUMAN	glycogen storage disease 14	D006008	VAR_062280	p.Thr115Ala				O95999	BCL10_HUMAN	malt lymphoma and mesothelioma	VAR_013224	p.Gly213Glu
	P36897	TGFR1_HUMAN	loeys-dietz syndrome 1a	D055947	VAR_022344	p.Thr200Ile				O95999	BCL10_HUMAN	mesothelioma	VAR_013224	p.Gly213Glu
	P37173	TGFR2_HUMAN	loeys-dietz syndrome 1b	D055947	VAR_022352	p.Tyr336Asn				O95999	BCL10_HUMAN	cancer	VAR_013225	p.Ser218Phe
	P38398	BRCA1_HUMAN	breast cancer	D001943	VAR_019945	p.Ser1140Gly				O96017	CHK2_HUMAN	li-fraumeni syndrome 2	VAR_008554	p.Arg145Trp
	P38398	BRCA1_HUMAN	breast cancer	D001943	VAR_070480	p.Ser1140Asn				O96017	CHK2_HUMAN	prostate cancer	VAR_019108	p.Arg145Pro
	P38398	BRCA1_HUMAN	breast cancer	D001943	VAR_020690	p.Ser1187Ile				O96017	CHK2_HUMAN	prostate cancer	VAR_019109	p.Gly167Arg
	P38398	BRCA1_HUMAN	breast-ovarian cancer, familial, 1	D061325	VAR_020690	p.Ser1187Ile				O96017	CHK2_HUMAN	osteogenic sarcoma	VAR_019101	p.Ala17Ser
	P38398	BRCA1_HUMAN	breast cancer	D001943	VAR_020695	p.Ser1217Tyr				O96017	CHK2_HUMAN	multiple cancers	VAR_026630	p.Thr59Lys
	P38398	BRCA1_HUMAN	breast-ovarian cancer, familial, 1	D061325	VAR_020695	p.Ser1217Tyr				O96017	CHK2_HUMAN	prostate cancer	VAR_019107	p.Glu64Lys
	P38398	BRCA1_HUMAN	breast cancer	D001943	VAR_070485	p.Ser1301Arg				P00367	DHE3_HUMAN	familial hyperinsulinemic hypoglycemia 6	VAR_008670	p.His507Tyr
	P38398	BRCA1_HUMAN	breast cancer	D001943	VAR_070504	p.Thr1720Ala				P00387	NB5R3_HUMAN	methemoglobinemia cyb5r3-related	VAR_010750	p.Leu73Pro
	P39019	RS19_HUMAN	diamond-blackfan anemia 1	D029503	VAR_046148	p.Ser59Phe				P00439	PH4H_HUMAN	phenylketonuria	VAR_000869	p.Ser16Pro
	P40337	VHL_HUMAN	von hippel-lindau disease	D006623	VAR_005714	p.Ser111Cys				P00439	PH4H_HUMAN	hyperphenylalaninemia	VAR_009239	p.Gln20Leu
	P40337	VHL_HUMAN	von hippel-lindau disease	D006623	VAR_005715	p.Ser111Asn				P00441	SODC_HUMAN	amyotrophic lateral sclerosis 1	VAR_007150	p.Glu101Gly
	P40337	VHL_HUMAN	von hippel-lindau disease	D006623	VAR_005716	p.Ser111Arg				P00441	SODC_HUMAN	amyotrophic lateral sclerosis 1	VAR_013534	p.Glu101Lys
	P40337	VHL_HUMAN	von hippel-lindau disease	D006623	VAR_005670	p.Ser38Pro				P00441	SODC_HUMAN	amyotrophic lateral sclerosis 1	VAR_007151	p.Asp102Gly
	P40337	VHL_HUMAN	pheochromocytoma	D010673	VAR_005675	p.Ser68Trp				P00441	SODC_HUMAN	amyotrophic lateral sclerosis 1	VAR_007152	p.Asp102Asn
	P40337	VHL_HUMAN	von hippel-lindau disease	D006623	VAR_005675	p.Ser68Trp				P00441	SODC_HUMAN	amyotrophic lateral sclerosis 1	VAR_008720	p.Ile105Phe
	P40692	MLH1_HUMAN	hereditary non-polyposis colorectal cancer 2	D055847	VAR_012916	p.Ser295Thr				P00441	SODC_HUMAN	amyotrophic lateral sclerosis 1	VAR_013535	p.Ser106Leu
	P40763	STAT3_HUMAN	hyperimmunoglobulin e recurrent infection syndrome, autosomal dominant	D007589	VAR_037381	p.Tyr657Cys				P00441	SODC_HUMAN	amyotrophic lateral sclerosis 1	VAR_007153	p.Leu107Val
	P40879	S26A3_HUMAN	diarrhea 1, secretory chloride, congenital		VAR_066072	p.Tyr520Cys				P00441	SODC_HUMAN	amyotrophic lateral sclerosis 1	VAR_013536	p.Gly109Val
	P43246	MSH2_HUMAN	hereditary non-polyposis colorectal cancer 1	D003123	VAR_043783	p.Thr732Ile				P00441	SODC_HUMAN	amyotrophic lateral sclerosis 1	VAR_045879	p.Thr55Arg
	P48048	KCNJ1_HUMAN	bartter syndrome 2	D001477	VAR_019726	p.Ser219Arg				P00441	SODC_HUMAN	amyotrophic lateral sclerosis 1	VAR_013527	p.Asn66Ser
	P48634	PRC2A_HUMAN	breast cancer	D001943	VAR_035796	p.Thr1087Ile				P00441	SODC_HUMAN	amyotrophic lateral sclerosis 1	VAR_007146	p.Gly94Ala
	P48637	GSHB_HUMAN	glutathione synthetase deficiency		VAR_003608	p.Tyr270Cys				P00441	SODC_HUMAN	amyotrophic lateral sclerosis 1	VAR_007147	p.Gly94Cys
	P48637	GSHB_HUMAN	glutathione synthetase deficiency		VAR_003609	p.Tyr270His				P00441	SODC_HUMAN	amyotrophic lateral sclerosis 1	VAR_007148	p.Gly94Asp
	P50402	EMD_HUMAN	emery-dreifuss muscular dystrophy 1, x-linked	D020389	VAR_005198	p.Ser54Phe				P00441	SODC_HUMAN	amyotrophic lateral sclerosis 1	VAR_007149	p.Gly94Arg
	P50570	DYN2_HUMAN	myopathy, centronuclear, 1	D020914	VAR_039043	p.Ser619Trp				P00441	SODC_HUMAN	amyotrophic lateral sclerosis 1	VAR_008719	p.Gly94Val
	P50570	DYN2_HUMAN	myopathy, centronuclear, 1	D020914	VAR_039042	p.Ser619Leu				P00441	SODC_HUMAN	amyotrophic lateral sclerosis 1	VAR_065194	p.Ala96Gly
	P51608	MECP2_HUMAN	rett syndrome	D015518	VAR_023555	p.Tyr120Asp				P00441	SODC_HUMAN	amyotrophic lateral sclerosis 1	VAR_045882	p.Val98Met
	P51787	KCNQ1_HUMAN	long qt syndrome 1	D029597	VAR_008125	p.Tyr184Ser				P00451	FA8_HUMAN	hemophilia a	VAR_028611	p.Lys1751Gln
	P51812	KS6A3_HUMAN	coffin-lowry syndrome	D038921	VAR_006195	p.Ser227Ala				P00451	FA8_HUMAN	hemophilia a	VAR_065316	p.Phe1762Leu
	P51812	KS6A3_HUMAN	gastric adenocarcinoma	D000230	VAR_040629	p.Tyr483Cys				P00451	FA8_HUMAN	hemophilia a	VAR_028612	p.Arg1768His
	P54845	NRL_HUMAN	retinitis pigmentosa 27	D012174	VAR_009268	p.Ser50Thr				P00451	FA8_HUMAN	hemophilia a	VAR_001145	p.Gly1769Arg
	P55017	S12A3_HUMAN	gitelman syndrome	D053579	VAR_039475	p.Thr60Met				P00491	PNPH_HUMAN	purine nucleoside phosphorylase deficiency	VAR_002246	p.Ala174Pro
	P58012	FOXL2_HUMAN	blepharophimosis, ptosis, and epicanthus inversus syndrome	D004370	VAR_021203	p.Tyr215Cys				P00492	HPRT_HUMAN	lesch-nyhan syndrome	VAR_006780	p.Val130Asp
	P58335	ANTR2_HUMAN	hyaline fibromatosis syndrome	D057770	VAR_022694	p.Tyr381Cys				P00492	HPRT_HUMAN	lesch-nyhan syndrome	VAR_006781	p.Leu131Ser
	P60201	MYPR_HUMAN	leukodystrophy, hypomyelinating, 1	D020371	VAR_015023	p.Thr116Lys				P00492	HPRT_HUMAN	gout hprt-related	VAR_006782	p.Ile132Met
	P60201	MYPR_HUMAN	leukodystrophy, hypomyelinating, 1	D020371	VAR_015038	p.Tyr207Cys				P00492	HPRT_HUMAN	lesch-nyhan syndrome	VAR_006783	p.Ile132Thr
	P60484	PTEN_HUMAN	cowden syndrome 1	D006223	VAR_026263	p.Tyr155Cys				P00492	HPRT_HUMAN	gout hprt-related	VAR_006784	p.Asp135Gly
	P60484	PTEN_HUMAN	cowden syndrome 1	D006223	VAR_007462	p.Tyr68His				P00492	HPRT_HUMAN	lesch-nyhan syndrome	VAR_006785	p.Met143Lys
	P60484	PTEN_HUMAN	bannayan-riley-ruvalcaba syndrome	D006223	VAR_007462	p.Tyr68His				P00519	ABL1_HUMAN	melanoma	VAR_032677	p.Arg166Lys
	P62736	ACTA_HUMAN	aortic aneurysm, familial thoracic 6	D017545	VAR_062581	p.Thr326Asn				P00519	ABL1_HUMAN	lung large cell carcinoma	VAR_032676	p.Arg47Gly
	P63261	ACTG_HUMAN	baraitser-winter syndrome 2		VAR_067817	p.Thr203Lys				P00533	EGFR_HUMAN	lung cancer	VAR_019297	p.Gly719Ser
	P68133	ACTS_HUMAN	nemaline myopathy 3	D017696	VAR_062432	p.Thr68Ile				P00533	EGFR_HUMAN	lung cancer	VAR_026086	p.Gly719Ala
	P98174	FGD1_HUMAN	aarskog-scott syndrome	D001289	VAR_019268	p.Ser205Ile				P00533	EGFR_HUMAN	lung cancer	VAR_026087	p.Gly719Cys
	Q02763	TIE2_HUMAN	dominantly inherited venous malformations		VAR_008716	p.Tyr897Ser				P00533	EGFR_HUMAN	lung cancer	VAR_026088	p.Gly719Asp
	Q02763	TIE2_HUMAN	dominantly inherited venous malformations		VAR_066606	p.Tyr897Cys				P00533	EGFR_HUMAN	lung cancer	VAR_026089	p.Gly724Ser
	Q04695	K1C17_HUMAN	pachyonychia congenita 2	D053549	VAR_003851	p.Tyr98Asp				P00533	EGFR_HUMAN	lung cancer	VAR_026090	p.Glu734Lys
	Q06124	PTN11_HUMAN	leopard syndrome 1	D044542	VAR_015614	p.Tyr279Cys				P00533	EGFR_HUMAN	lung cancer	VAR_026093	p.Leu747Phe
	Q06124	PTN11_HUMAN	leopard syndrome 1	D044542	VAR_027188	p.Tyr279Ser				P00533	EGFR_HUMAN	lung cancer	VAR_026095	p.Arg748Pro
	Q06124	PTN11_HUMAN	noonan syndrome 1	D009634	VAR_015614	p.Tyr279Cys				P00533	EGFR_HUMAN	lung cancer	VAR_069502	p.Ser768Ile
	Q06124	PTN11_HUMAN	noonan syndrome 1	D009634	VAR_027189	p.Thr415Met				P00533	EGFR_HUMAN	lung cancer	VAR_069503	p.Val769Met
	Q06124	PTN11_HUMAN	noonan syndrome 1	D009634	VAR_015605	p.Tyr62Asp				P00533	EGFR_HUMAN	lung cancer	VAR_026099	p.Leu833Val
	Q06124	PTN11_HUMAN	noonan syndrome 1	D009634	VAR_015606	p.Tyr63Cys				P00533	EGFR_HUMAN	lung cancer	VAR_026100	p.Val834Leu
	Q06187	BTK_HUMAN	x-linked agammaglobulinemia	D000361	VAR_008298	p.Ser115Phe				P00533	EGFR_HUMAN	lung cancer	VAR_026103	p.Gly873Glu
	Q06187	BTK_HUMAN	x-linked agammaglobulinemia	D000361	VAR_006234	p.Tyr361Cys				P00558	PGK1_HUMAN	phosphoglycerate kinase 1 deficiency	VAR_006077	p.Gly158Val
	Q08499	PDE4D_HUMAN	acrodysostosis 2, with or without hormone resistance		VAR_068242	p.Ser190Ala				P00558	PGK1_HUMAN	phosphoglycerate kinase 1 deficiency	VAR_006078	p.Asp164Val
	Q12809	KCNH2_HUMAN	long qt syndrome 2	D008133	VAR_068256	p.Ser320Leu				P00558	PGK1_HUMAN	phosphoglycerate kinase 1 deficiency	VAR_006080	p.Arg206Pro
	Q12809	KCNH2_HUMAN	long qt syndrome 2	D008133	VAR_008928	p.Tyr611His				P00740	FA9_HUMAN	hemophilia b	VAR_006550	p.Cys108Ser
	Q13148	TADBP_HUMAN	amyotrophic lateral sclerosis 10	D000690	VAR_058618	p.Ser379Pro				P00740	FA9_HUMAN	hemophilia b	VAR_006551	p.Asp110Asn
	Q13148	TADBP_HUMAN	amyotrophic lateral sclerosis 10	D000690	VAR_058617	p.Ser379Cys				P00740	FA9_HUMAN	hemophilia b	VAR_006552	p.Ile112Ser
	Q13148	TADBP_HUMAN	amyotrophic lateral sclerosis 10	D000690	VAR_058619	p.Ser393Leu				P00740	FA9_HUMAN	hemophilia b	VAR_006553	p.Asn113Lys
	Q13480	GAB1_HUMAN	breast cancer	D001943	VAR_036133	p.Thr387Asn				P00740	FA9_HUMAN	hemophilia b	VAR_006554	p.Tyr115Cys
	Q13480	GAB1_HUMAN	breast cancer	D001943	VAR_036132	p.Tyr83Cys				P00740	FA9_HUMAN	hemophilia b	VAR_006555	p.Cys119Phe
	Q13950	RUNX2_HUMAN	cleidocranial dysplasia	D002973	VAR_012133	p.Ser118Arg				P00740	FA9_HUMAN	hemophilia b	VAR_006556	p.Cys119Arg
	Q13950	RUNX2_HUMAN	cleidocranial dysplasia	D002973	VAR_064082	p.Ser118Asn				P00747	PLMN_HUMAN	plasminogen deficiency	VAR_006628	p.Ser591Pro
	Q14204	DYHC1_HUMAN	spinal muscular atrophy, lower extremity-predominant 1, autosomal dominant	D014897	VAR_067822	p.Tyr970Cys				P00813	ADA_HUMAN	severe combined immunodeficiency autosomal recessive t-cell-negative/b-cell-negative/nk-cell-negative	VAR_002212	p.Gly74Cys
	Q14524	SCN5A_HUMAN	brugada syndrome 1	D053840	VAR_055196	p.Tyr1494Asn				P00918	CAH2_HUMAN	osteopetrosis, autosomal recessive 3	VAR_001382	p.His107Tyr
	Q14680	MELK_HUMAN	ovarian mucinous carcinoma	D002288	VAR_040798	p.Thr460Met				P00966	ASSY_HUMAN	citrullinemia 1	VAR_058341	p.Arg127Gln
	Q15147	PLCB4_HUMAN	auriculocondylar syndrome 2		VAR_068562	p.Tyr623Cys				P00966	ASSY_HUMAN	citrullinemia 1	VAR_058342	p.Arg127Trp
	Q15583	TGIF1_HUMAN	holoprosencephaly 4	D016142	VAR_009961	p.Ser157Cys				P00966	ASSY_HUMAN	citrullinemia 1	VAR_015898	p.Trp179Arg
	Q15583	TGIF1_HUMAN	holoprosencephaly 4	D016142	VAR_009964	p.Ser291Phe				P00966	ASSY_HUMAN	citrullinemia 1	VAR_000686	p.Ser180Asn
	Q15746	MYLK_HUMAN	aortic aneurysm, familial thoracic 7	D017545	VAR_065577	p.Ser1759Pro				P00966	ASSY_HUMAN	citrullinemia 1	VAR_058350	p.Lys277Thr
	Q16620	NTRK2_HUMAN	obesity hyperphagia and developmental delay		VAR_065890	p.Tyr706Cys				P00966	ASSY_HUMAN	citrullinemia 1	VAR_016008	p.Arg279Gln
	Q16828	DUS6_HUMAN	hypogonadotropic hypogonadism 19 with or without anosmia	D017436	VAR_069944	p.Ser182Phe				P00966	ASSY_HUMAN	citrullinemia 1	VAR_000689	p.Gly280Arg
	Q32MZ4	LRRF1_HUMAN	breast cancer	D001943	VAR_036037	p.Ser68Cys				P00966	ASSY_HUMAN	citrullinemia 1	VAR_015902	p.Glu283Lys
	Q86UP2	KTN1_HUMAN	breast cancer	D001943	VAR_035932	p.Thr1316Pro				P00966	ASSY_HUMAN	citrullinemia 1	VAR_058351	p.Thr284Ile
	Q8TAA9	VANG1_HUMAN	neural tube defects	D009436	VAR_062322	p.Ser83Leu				P00966	ASSY_HUMAN	citrullinemia 1	VAR_000691	p.Gly324Ser
	Q92574	TSC1_HUMAN	tuberous sclerosis 1	D014402	VAR_009403	p.Thr417Ile				P00966	ASSY_HUMAN	citrullinemia 1	VAR_058356	p.Gly324Val
	Q92793	CBP_HUMAN	rubinstein-taybi syndrome 1	D012415	VAR_035082	p.Tyr1450His				P00966	ASSY_HUMAN	citrullinemia 1	VAR_058358	p.Val345Gly
	Q92947	GCDH_HUMAN	glutaric aciduria 1	D054069	VAR_000421	p.Thr429Met				P00966	ASSY_HUMAN	citrullinemia 1	VAR_058359	p.Gly347Arg
	Q96K58	ZN668_HUMAN	breast cancer	D001943	VAR_035597	p.Thr331Arg				P00966	ASSY_HUMAN	citrullinemia 1	VAR_058360	p.Tyr359Asp
	Q99959	PKP2_HUMAN	arrhythmogenic right ventricular dysplasia, familial, 9	D019571	VAR_065706	p.Ser169Gly				P00966	ASSY_HUMAN	citrullinemia 1	VAR_016012	p.Thr389Ile
	Q99959	PKP2_HUMAN	arrhythmogenic right ventricular dysplasia, familial, 9	D019571	VAR_065716	p.Tyr631Cys				P00966	ASSY_HUMAN	citrullinemia 1	VAR_000694	p.Gly390Arg
	Q9BQ52	RNZ2_HUMAN	prostate cancer, hereditary, 2	D011471	VAR_017426	p.Ser217Leu				P00966	ASSY_HUMAN	citrullinemia 1	VAR_058338	p.Ser79Pro
	Q9BR39	JPH2_HUMAN	cardiomyopathy, familial hypertrophic 17	D024741	VAR_065473	p.Ser165Phe				P00966	ASSY_HUMAN	citrullinemia 1	VAR_000683	p.Arg86Cys
	Q9BXB4	OSB11_HUMAN	breast cancer	D001943	VAR_036100	p.Ser184Leu				P00966	ASSY_HUMAN	citrullinemia 1	VAR_015892	p.Arg86His
	Q9BXM7	PINK1_HUMAN	parkinson disease 6	D020734	VAR_046589	p.Thr313Met				P00966	ASSY_HUMAN	citrullinemia 1	VAR_015893	p.Arg95Ser
	Q9H2C0	GAN_HUMAN	giant axonal neuropathy	D056768	VAR_010760	p.Ser52Gly				P00966	ASSY_HUMAN	citrullinemia 1	VAR_015894	p.Pro96Ser
	Q9H3D4	P63_HUMAN	ovarian cancer	D010051	VAR_020880	p.Ser560Ala				P00966	ASSY_HUMAN	citrullinemia 1	VAR_058339	p.Pro96His
	Q9UKT5	FBX4_HUMAN	cancer	D009369	VAR_063501	p.Ser12Leu				P00995	ISK1_HUMAN	pancreatitis, hereditary	VAR_032011	p.Leu12Phe
	Q9ULL8	SHRM4_HUMAN	mental retardation, x-linked, syndromic, stocco dos santos type	D038901	VAR_032258	p.Ser1089Leu				P00995	ISK1_HUMAN	pancreatitis, hereditary	VAR_011688	p.Leu14Pro
	Q9Y6D9	MD1L1_HUMAN	lymphoid cancer	D007945	VAR_019707	p.Ser29Leu				P01008	ANT3_HUMAN	antithrombin iii deficiency	VAR_027458	p.Leu178His
	Q9Y6N7	ROBO1_HUMAN	breast cancer	D001943	VAR_019071	p.Ser1055Asn				P01008	ANT3_HUMAN	antithrombin iii deficiency	VAR_027459	p.Phe179Leu
										P01008	ANT3_HUMAN	antithrombin iii deficiency	VAR_007035	p.Arg56Cys
										P01008	ANT3_HUMAN	antithrombin iii deficiency	VAR_007036	p.Pro73Leu
										P01024	CO3_HUMAN	hemolytic uremic syndrome atypical 5	VAR_063215	p.Arg735Trp
										P01106	MYC_HUMAN	burkitt lymphoma	VAR_063385	p.Pro57Ser
										P01106	MYC_HUMAN	burkitt lymphoma	VAR_063386	p.Pro59Ala
										P01111	RASN_HUMAN	noonan syndrome 6	VAR_063086	p.Gly60Glu
										P01111	RASN_HUMAN	lung carcinoma cell and melanoma	VAR_006847	p.Gln61Arg
										P01111	RASN_HUMAN	neuroblastoma cell	VAR_006846	p.Gln61Lys
										P01112	RASH_HUMAN	faciocutaneoskeletal syndrome	VAR_045982	p.Ala146Thr
										P01112	RASH_HUMAN	faciocutaneoskeletal syndrome	VAR_045983	p.Ala146Val
										P01112	RASH_HUMAN	faciocutaneoskeletal syndrome	VAR_045978	p.Thr58Ile
										P01112	RASH_HUMAN	melanoma	VAR_006838	p.Gln61Leu
										P01112	RASH_HUMAN	thyroid carcinoma	VAR_045979	p.Gln61Lys
										P01112	RASH_HUMAN	congenital myopathy with excess of muscle spindles	VAR_045980	p.Glu63Lys
										P01116	RASK_HUMAN	noonan syndrome 3	VAR_026111	p.Thr58Ile
										P01116	RASK_HUMAN	gastric cancer	VAR_016030	p.Ala59Thr
										P01116	RASK_HUMAN	cardiofaciocutaneous syndrome 2	VAR_026112	p.Gly60Arg
										P01116	RASK_HUMAN	noonan syndrome 3	VAR_065146	p.Gly60Ser
										P01116	RASK_HUMAN	colorectal cancer	VAR_036306	p.Gln61Arg
										P01116	RASK_HUMAN	lung carcinoma	VAR_006841	p.Gln61His
										P01116	RASK_HUMAN	cardiofaciocutaneous syndrome 2	VAR_069784	p.Tyr71His
										P01130	LDLR_HUMAN	familial hypercholesterolemia	VAR_005376	p.Ala399Asp
										P01130	LDLR_HUMAN	familial hypercholesterolemia	VAR_007987	p.Leu401Val
										P01130	LDLR_HUMAN	familial hypercholesterolemia	VAR_008995	p.Phe403Leu
										P01130	LDLR_HUMAN	familial hypercholesterolemia	VAR_062383	p.Pro826Ser
										P01130	LDLR_HUMAN	familial hypercholesterolemia	VAR_005419	p.Tyr828Cys
										P01241	SOMA_HUMAN	growth hormone deficiency, isolated, 1b	VAR_015811	p.Ser134Cys
										P01241	SOMA_HUMAN	growth hormone deficiency, isolated, 1b	VAR_015812	p.Ser134Arg
										P01241	SOMA_HUMAN	kowarski syndrome	VAR_015813	p.Asp138Gly
										P01241	SOMA_HUMAN	growth hormone deficiency, isolated, 1b	VAR_015805	p.Lys67Arg
										P01241	SOMA_HUMAN	growth hormone deficiency, isolated, 1b	VAR_015805	p.Lys67Arg
										P01241	SOMA_HUMAN	growth hormone deficiency, isolated, 1b	VAR_015805	p.Lys67Arg
										P01241	SOMA_HUMAN	growth hormone deficiency, isolated, 1b	VAR_015805	p.Lys67Arg
										P01241	SOMA_HUMAN	growth hormone deficiency, isolated, 1b	VAR_015806	p.Asn73Asp
										P01241	SOMA_HUMAN	short stature	VAR_032702	p.Cys79Ser
										P01241	SOMA_HUMAN	short stature	VAR_032702	p.Cys79Ser
										P02452	CO1A1_HUMAN	osteogenesis imperfecta 2	VAR_063312	p.Gly548Ala
										P02489	CRYAA_HUMAN	cataract 9, multiple types	VAR_003819	p.Arg116Cys
										P02489	CRYAA_HUMAN	cataract 9, multiple types	VAR_046893	p.Arg116His
										P02489	CRYAA_HUMAN	cataract 9, multiple types	VAR_038375	p.Arg49Cys
										P02533	K1C14_HUMAN	epidermolysis bullosa simplex, dowling-meara type	VAR_010442	p.Leu122Phe
										P02533	K1C14_HUMAN	epidermolysis bullosa simplex, koebner type	VAR_010442	p.Leu122Phe
										P02533	K1C14_HUMAN	epidermolysis bullosa simplex, dowling-meara type	VAR_010443	p.Asn123Ser
										P02533	K1C14_HUMAN	epidermolysis bullosa simplex, dowling-meara type	VAR_023720	p.Asn123Lys
										P02533	K1C14_HUMAN	epidermolysis bullosa simplex, dowling-meara type	VAR_003837	p.Arg125Cys
										P02533	K1C14_HUMAN	epidermolysis bullosa simplex, dowling-meara type	VAR_003838	p.Arg125His
										P02533	K1C14_HUMAN	epidermolysis bullosa simplex, dowling-meara type	VAR_010444	p.Arg125Ser
										P02533	K1C14_HUMAN	epidermolysis bullosa simplex, dowling-meara type	VAR_023721	p.Arg125Gly
										P02533	K1C14_HUMAN	epidermolysis bullosa simplex, dowling-meara type	VAR_010445	p.Tyr129Asp
										P02533	K1C14_HUMAN	epidermolysis bullosa simplex, dowling-meara type	VAR_023722	p.Leu130Pro
										P02533	K1C14_HUMAN	epidermolysis bullosa simplex, koebner type	VAR_023723	p.Val133Leu
										P02533	K1C14_HUMAN	epidermolysis bullosa simplex, weber-cockayne type	VAR_023723	p.Val133Leu
										P02533	K1C14_HUMAN	epidermolysis bullosa simplex, koebner type	VAR_031635	p.Arg134Pro
										P02533	K1C14_HUMAN	epidermolysis bullosa simplex, weber-cockayne type	VAR_023724	p.Leu408Met
										P02533	K1C14_HUMAN	epidermolysis bullosa simplex, koebner type	VAR_023725	p.Ala413Thr
										P02533	K1C14_HUMAN	epidermolysis bullosa simplex, koebner type	VAR_003844	p.Tyr415His
										P02533	K1C14_HUMAN	epidermolysis bullosa simplex, weber-cockayne type	VAR_031638	p.Tyr415Cys
										P02533	K1C14_HUMAN	epidermolysis bullosa simplex, dowling-meara type	VAR_031639	p.Arg416Pro
										P02533	K1C14_HUMAN	epidermolysis bullosa simplex, dowling-meara type	VAR_027721	p.Arg417Pro
										P02533	K1C14_HUMAN	epidermolysis bullosa simplex, dowling-meara type	VAR_003845	p.Leu419Gln
										P02533	K1C14_HUMAN	epidermolysis bullosa simplex, weber-cockayne type	VAR_010452	p.Glu422Lys
										P02538	K2C6A_HUMAN	pachyonychia congenita 1	VAR_017075	p.Phe174Val
										P02545	LMNA_HUMAN	cardiomyopathy, dilated 1a	VAR_070174	p.Arg101Pro
										P02545	LMNA_HUMAN	cardiomyopathy, dilated 1a	VAR_039765	p.Asp192Gly
										P02545	LMNA_HUMAN	cardiomyopathy, dilated 1a	VAR_009977	p.Asn195Lys
										P02545	LMNA_HUMAN	cardiomyopathy, dilated 1a	VAR_009978	p.Glu203Gly
										P02545	LMNA_HUMAN	cardiomyopathy, dilated 1a	VAR_039767	p.Glu203Lys
										P02545	LMNA_HUMAN	emery-dreifuss muscular dystrophy 2, autosomal dominant	VAR_064964	p.Phe206Leu
										P02545	LMNA_HUMAN	cardiomyopathy, dilated 1a	VAR_070177	p.Ile210Ser
										P02545	LMNA_HUMAN	cardiomyopathy, dilated 1a	VAR_039768	p.Leu215Pro
										P02545	LMNA_HUMAN	emery-dreifuss muscular dystrophy 2, autosomal dominant	VAR_039746	p.Arg25Gly
										P02545	LMNA_HUMAN	emery-dreifuss muscular dystrophy 2, autosomal dominant	VAR_039747	p.Arg25Pro
										P02545	LMNA_HUMAN	emery-dreifuss muscular dystrophy 2, autosomal dominant	VAR_064966	p.Leu271Pro
										P02545	LMNA_HUMAN	lipodystrophy, familial partial, 2	VAR_039748	p.Arg28Trp
										P02545	LMNA_HUMAN	emery-dreifuss muscular dystrophy 2, autosomal dominant	VAR_009982	p.Gln294Pro
										P02545	LMNA_HUMAN	emery-dreifuss muscular dystrophy 2, autosomal dominant	VAR_064967	p.Ser295Pro
										P02545	LMNA_HUMAN	charcot-marie-tooth disease 2b1	VAR_017661	p.Arg298Cys
										P02545	LMNA_HUMAN	muscular dystrophy congenital lmna-related	VAR_063590	p.Leu302Pro
										P02545	LMNA_HUMAN	emery-dreifuss muscular dystrophy 2, autosomal dominant	VAR_064968	p.Ser303Pro
										P02545	LMNA_HUMAN	emery-dreifuss muscular dystrophy 2, autosomal dominant	VAR_009987	p.Arg386Lys
										P02545	LMNA_HUMAN	cardiomyopathy, dilated 1a	VAR_070180	p.Arg388His
										P02545	LMNA_HUMAN	cardiomyopathy, dilated 1a	VAR_039778	p.Arg399Cys
										P02545	LMNA_HUMAN	lipodystrophy, familial partial, 2	VAR_039778	p.Arg399Cys
										P02545	LMNA_HUMAN	cardiomyopathy, dilated 1a	VAR_039779	p.Arg435Cys
										P02545	LMNA_HUMAN	emery-dreifuss muscular dystrophy 2, autosomal dominant	VAR_009971	p.Tyr45Cys
										P02545	LMNA_HUMAN	emery-dreifuss muscular dystrophy 2, autosomal dominant	VAR_009988	p.Arg453Trp
										P02545	LMNA_HUMAN	muscular dystrophy congenital lmna-related	VAR_063592	p.Arg453Pro
										P02545	LMNA_HUMAN	emery-dreifuss muscular dystrophy 2, autosomal dominant	VAR_064972	p.Leu454Pro
										P02545	LMNA_HUMAN	muscular dystrophy congenital lmna-related	VAR_063593	p.Arg455Pro
										P02545	LMNA_HUMAN	emery-dreifuss muscular dystrophy 2, autosomal dominant	VAR_039781	p.Asn456Ile
										P02545	LMNA_HUMAN	emery-dreifuss muscular dystrophy 2, autosomal dominant	VAR_039782	p.Asn456Lys
										P02545	LMNA_HUMAN	muscular dystrophy congenital lmna-related	VAR_063594	p.Asn456Asp
										P02545	LMNA_HUMAN	emery-dreifuss muscular dystrophy 2, autosomal dominant	VAR_064973	p.Asp461Tyr
										P02545	LMNA_HUMAN	lipodystrophy, familial partial, 2	VAR_009989	p.Gly465Asp
										P02545	LMNA_HUMAN	emery-dreifuss muscular dystrophy 2, autosomal dominant	VAR_064974	p.Trp467Arg
										P02545	LMNA_HUMAN	emery-dreifuss muscular dystrophy 2, autosomal dominant	VAR_009990	p.Ile469Thr
										P02545	LMNA_HUMAN	limb-girdle muscular dystrophy 1b	VAR_039783	p.Tyr481His
										P02545	LMNA_HUMAN	lipodystrophy, familial partial, 2	VAR_009991	p.Arg482Leu
										P02545	LMNA_HUMAN	lipodystrophy, familial partial, 2	VAR_009992	p.Arg482Gln
										P02545	LMNA_HUMAN	lipodystrophy, familial partial, 2	VAR_009993	p.Arg482Trp
										P02545	LMNA_HUMAN	lipodystrophy, familial partial, 2	VAR_009994	p.Lys486Asn
										P02545	LMNA_HUMAN	emery-dreifuss muscular dystrophy 2, autosomal dominant	VAR_009972	p.Arg50Pro
										P02545	LMNA_HUMAN	emery-dreifuss muscular dystrophy 2, autosomal dominant	VAR_039754	p.Arg50Ser
										P02545	LMNA_HUMAN	muscular dystrophy congenital lmna-related	VAR_009972	p.Arg50Pro
										P02545	LMNA_HUMAN	emery-dreifuss muscular dystrophy 2, autosomal dominant	VAR_039784	p.Trp520Ser
										P02545	LMNA_HUMAN	cardiomyopathy, dilated 1a	VAR_067258	p.Gly523Arg
										P02545	LMNA_HUMAN	emery-dreifuss muscular dystrophy 2, autosomal dominant	VAR_009995	p.Arg527Pro
										P02545	LMNA_HUMAN	hutchinson-gilford progeria syndrome	VAR_017663	p.Arg527Cys
										P02545	LMNA_HUMAN	lipodystrophy, familial partial, 2	VAR_009995	p.Arg527Pro
										P02545	LMNA_HUMAN	mandibuloacral dysplasia with type	VAR_018727	p.Arg527His
										P02545	LMNA_HUMAN	emery-dreifuss muscular dystrophy 2, autosomal dominant	VAR_009996	p.Thr528Lys
										P02545	LMNA_HUMAN	emery-dreifuss muscular dystrophy 2, autosomal dominant	VAR_039785	p.Thr528Arg
										P02545	LMNA_HUMAN	mandibuloacral dysplasia with type	VAR_034709	p.Ala529Val
										P02545	LMNA_HUMAN	emery-dreifuss muscular dystrophy 2, autosomal dominant	VAR_009997	p.Leu530Pro
										P02545	LMNA_HUMAN	apical left ventricular aneurysm	VAR_039786	p.Arg541Cys
										P02545	LMNA_HUMAN	cardiomyopathy, dilated 1a	VAR_039788	p.Arg541Ser
										P02545	LMNA_HUMAN	emery-dreifuss muscular dystrophy 2, autosomal dominant	VAR_039787	p.Arg541His
										P02545	LMNA_HUMAN	emery-dreifuss muscular dystrophy 2, autosomal dominant	VAR_039788	p.Arg541Ser
										P02545	LMNA_HUMAN	emery-dreifuss muscular dystrophy 2, autosomal dominant	VAR_064975	p.Arg541Pro
										P02545	LMNA_HUMAN	hutchinson-gilford progeria syndrome	VAR_034710	p.Lys542Asn
										P02545	LMNA_HUMAN	cardiomyopathy, dilated, with hypergonadotropic hypogonadism	VAR_017656	p.Ala57Pro
										P02545	LMNA_HUMAN	cardiomyopathy, dilated 1a	VAR_039789	p.Ser573Leu
										P02545	LMNA_HUMAN	lipodystrophy, familial partial, 2	VAR_039789	p.Ser573Leu
										P02545	LMNA_HUMAN	mandibuloacral dysplasia with type	VAR_039789	p.Ser573Leu
										P02545	LMNA_HUMAN	lipodystrophy, familial partial, 2	VAR_009998	p.Arg582His
										P02545	LMNA_HUMAN	cardiomyopathy, dilated, with hypergonadotropic hypogonadism	VAR_064055	p.Leu59Arg
										P02545	LMNA_HUMAN	cardiomyopathy, dilated 1a	VAR_034706	p.Arg60Gly
										P02545	LMNA_HUMAN	lipodystrophy, familial partial, 2	VAR_034706	p.Arg60Gly
										P02545	LMNA_HUMAN	hutchinson-gilford progeria syndrome	VAR_017664	p.Gly608Ser
										P02545	LMNA_HUMAN	lipodystrophy, familial partial, 2	VAR_039755	p.Arg62Gly
										P02545	LMNA_HUMAN	emery-dreifuss muscular dystrophy 2, autosomal dominant	VAR_039791	p.Arg624His
										P02545	LMNA_HUMAN	emery-dreifuss muscular dystrophy 2, autosomal dominant	VAR_009974	p.Ile63Ser
										P02545	LMNA_HUMAN	emery-dreifuss muscular dystrophy 2, autosomal dominant	VAR_039756	p.Ile63Asn
										P02545	LMNA_HUMAN	emery-dreifuss muscular dystrophy 2, autosomal dominant	VAR_039757	p.Glu65Gly
										P02545	LMNA_HUMAN	cardiomyopathy, dilated 1a	VAR_009975	p.Leu85Arg
										P02545	LMNA_HUMAN	cardiomyopathy, dilated 1a	VAR_039758	p.Arg89Leu
										P02545	LMNA_HUMAN	cardiomyopathy, dilated 1a	VAR_067257	p.Leu92Phe
										P02545	LMNA_HUMAN	cardiomyopathy, dilated 1a	VAR_039759	p.Lys97Glu
										P02647	APOA1_HUMAN	amyloidosis 8	VAR_000609	p.Gly50Arg
										P02649	APOE_HUMAN	hyperlipoproteinemia 3	VAR_000656	p.Arg154Ser
										P02649	APOE_HUMAN	hyperlipoproteinemia 3	VAR_000657	p.Arg154Cys
										P02649	APOE_HUMAN	hyperlipoproteinemia 3	VAR_000664	p.Arg176Cys
										P02656	APOC3_HUMAN	hyperalphalipoproteinemia 2	VAR_000643	p.Lys78Glu
										P02671	FIBA_HUMAN	amyloidosis 8	VAR_010731	p.Glu545Val
										P02671	FIBA_HUMAN	amyloidosis 8	VAR_010732	p.Arg573Leu
										P02730	B3AT_HUMAN	hemolytic anemia	VAR_000798	p.Glu40Lys
										P03372	ESR1_HUMAN	breast cancer	VAR_033028	p.His6Tyr
										P03891	NU2M_HUMAN	leber hereditary optic neuropathy	VAR_004756	p.Gly259Ser
										P03897	NU3M_HUMAN	mitochondrial complex i deficiency	VAR_035091	p.Ser45Pro
										P03897	NU3M_HUMAN	leigh syndrome	VAR_035092	p.Ala47Thr
										P03897	NU3M_HUMAN	mitochondrial complex i deficiency	VAR_035092	p.Ala47Thr
										P03971	MIS_HUMAN	persistent muellerian duct syndrome 1	VAR_007490	p.Arg194Cys
										P04049	RAF1_HUMAN	noonan syndrome 5	VAR_037807	p.Arg256Ser
										P04049	RAF1_HUMAN	leopard syndrome 2	VAR_037808	p.Ser257Leu
										P04049	RAF1_HUMAN	noonan syndrome 5	VAR_037808	p.Ser257Leu
										P04049	RAF1_HUMAN	noonan syndrome 5	VAR_037809	p.Ser259Phe
										P04049	RAF1_HUMAN	hypertrophic cardiomyopathy	VAR_037810	p.Thr260Ile
										P04049	RAF1_HUMAN	noonan syndrome 5	VAR_037811	p.Thr260Arg
										P04049	RAF1_HUMAN	noonan syndrome 5	VAR_037812	p.Pro261Ala
										P04049	RAF1_HUMAN	noonan syndrome 5	VAR_037813	p.Pro261Leu
										P04049	RAF1_HUMAN	noonan syndrome 5	VAR_037814	p.Pro261Ser
										P04049	RAF1_HUMAN	noonan syndrome 5	VAR_037815	p.Val263Ala
										P04049	RAF1_HUMAN	lung adenocarcinoma	VAR_041038	p.Gln335His
										P04049	RAF1_HUMAN	noonan syndrome 5	VAR_037816	p.Asp486Gly
										P04049	RAF1_HUMAN	noonan syndrome 5	VAR_037817	p.Asp486Asn
										P04049	RAF1_HUMAN	noonan syndrome 5	VAR_037818	p.Thr491Ile
										P04049	RAF1_HUMAN	noonan syndrome 5	VAR_037819	p.Thr491Arg
										P04049	RAF1_HUMAN	noonan syndrome 5	VAR_037820	p.Ser612Thr
										P04049	RAF1_HUMAN	leopard syndrome 2	VAR_037821	p.Leu613Val
										P04049	RAF1_HUMAN	noonan syndrome 5	VAR_037821	p.Leu613Val
										P04062	GLCM_HUMAN	gaucher disease	VAR_003313	p.Asp448His
										P04062	GLCM_HUMAN	gaucher disease	VAR_003314	p.Asp448Val
										P04062	GLCM_HUMAN	gaucher disease	VAR_010073	p.Phe450Ile
										P04062	GLCM_HUMAN	gaucher disease	VAR_003315	p.Tyr451His
										P04062	GLCM_HUMAN	gaucher disease	VAR_010074	p.Lys452Gln
										P04062	GLCM_HUMAN	gaucher disease	VAR_003316	p.Pro454Arg
										P04062	GLCM_HUMAN	gaucher disease	VAR_032215	p.Met455Val
										P04062	GLCM_HUMAN	gaucher disease	VAR_003317	p.Phe456Val
										P04062	GLCM_HUMAN	gaucher disease	VAR_003318	p.Tyr457Cys
										P04075	ALDOA_HUMAN	glycogen storage disease 12	VAR_044142	p.Glu207Lys
										P04075	ALDOA_HUMAN	glycogen storage disease 12	VAR_044144	p.Gly347Ser
										P04080	CYTB_HUMAN	epilepsy, progressive myoclonic 1	VAR_002206	p.Gly4Arg
										P04150	GCR_HUMAN	glucocorticoid resistance	VAR_004676	p.Asp641Val
										P04180	LCAT_HUMAN	lecithin-cholesterol acyltransferase deficiency	VAR_039030	p.Ser205Asn
										P04181	OAT_HUMAN	hyperornithinemia with gyrate atrophy of choroid and retina	VAR_000576	p.Thr267Ile
										P04181	OAT_HUMAN	hyperornithinemia with gyrate atrophy of choroid and retina	VAR_000577	p.Ala270Pro
										P04181	OAT_HUMAN	hyperornithinemia with gyrate atrophy of choroid and retina	VAR_000578	p.Arg271Lys
										P04181	OAT_HUMAN	hyperornithinemia with gyrate atrophy of choroid and retina	VAR_000582	p.Gly375Ala
										P04264	K2C1_HUMAN	epidermolytic hyperkeratosis	VAR_003855	p.Ser186Pro
										P04264	K2C1_HUMAN	epidermolytic hyperkeratosis	VAR_003856	p.Asn188Ser
										P04264	K2C1_HUMAN	epidermolytic hyperkeratosis	VAR_017821	p.Asn188Lys
										P04264	K2C1_HUMAN	epidermolytic hyperkeratosis	VAR_017822	p.Asn188Thr
										P04264	K2C1_HUMAN	epidermolytic hyperkeratosis	VAR_003857	p.Ser193Pro
										P04264	K2C1_HUMAN	epidermolytic hyperkeratosis	VAR_017824	p.Asp340Val
										P04629	NTRK1_HUMAN	congenital insensitivity to pain with anhidrosis	VAR_068482	p.Glu492Lys
										P04629	NTRK1_HUMAN	congenital insensitivity to pain with anhidrosis	VAR_009632	p.Asp674Tyr
										P04629	NTRK1_HUMAN	congenital insensitivity to pain with anhidrosis	VAR_009633	p.Pro695Leu
										P04637	P53_HUMAN	sporadic cancer	VAR_044546	p.Val10Ile
										P04637	P53_HUMAN	sporadic cancer	VAR_044655	p.Gln100Arg
										P04637	P53_HUMAN	sporadic cancer	VAR_044656	p.Lys101Asn
										P04637	P53_HUMAN	sporadic cancers	VAR_044657	p.Lys101Arg
										P04637	P53_HUMAN	sporadic cancers	VAR_044658	p.Thr102Ile
										P04637	P53_HUMAN	sporadic cancer	VAR_044660	p.Gln104Leu
										P04637	P53_HUMAN	sporadic cancers	VAR_044659	p.Gln104His
										P04637	P53_HUMAN	li-fraumeni syndrome	VAR_044661	p.Gly105Cys
										P04637	P53_HUMAN	sporadic cancer	VAR_044664	p.Gly105Ser
										P04637	P53_HUMAN	sporadic cancers	VAR_044662	p.Gly105Asp
										P04637	P53_HUMAN	sporadic cancers	VAR_044663	p.Gly105Arg
										P04637	P53_HUMAN	sporadic cancers	VAR_044665	p.Gly105Val
										P04637	P53_HUMAN	sporadic cancer	VAR_044666	p.Ser106Gly
										P04637	P53_HUMAN	sporadic cancers	VAR_044547	p.Glu11Lys
										P04637	P53_HUMAN	sporadic cancers	VAR_044548	p.Glu11Gln
										P04637	P53_HUMAN	sporadic cancer	VAR_044781	p.Pro142Arg
										P04637	P53_HUMAN	sporadic cancers	VAR_044778	p.Pro142Ala
										P04637	P53_HUMAN	sporadic cancers	VAR_044779	p.Pro142His
										P04637	P53_HUMAN	sporadic cancers	VAR_044780	p.Pro142Leu
										P04637	P53_HUMAN	sporadic cancers	VAR_044782	p.Pro142Ser
										P04637	P53_HUMAN	sporadic cancers	VAR_044783	p.Pro142Thr
										P04637	P53_HUMAN	sporadic cancers	VAR_045794	p.Pro142Phe
										P04637	P53_HUMAN	sporadic cancers	VAR_005887	p.Val143Ala
										P04637	P53_HUMAN	sporadic cancers	VAR_044784	p.Val143Glu
										P04637	P53_HUMAN	sporadic cancers	VAR_044785	p.Val143Gly
										P04637	P53_HUMAN	sporadic cancers	VAR_044786	p.Val143Leu
										P04637	P53_HUMAN	sporadic cancers	VAR_044787	p.Val143Met
										P04637	P53_HUMAN	li-fraumeni syndrome	VAR_044790	p.Gln144Leu
										P04637	P53_HUMAN	sporadic cancers	VAR_005888	p.Gln144Pro
										P04637	P53_HUMAN	sporadic cancers	VAR_044788	p.Gln144His
										P04637	P53_HUMAN	sporadic cancers	VAR_044789	p.Gln144Lys
										P04637	P53_HUMAN	sporadic cancers	VAR_044791	p.Gln144Arg
										P04637	P53_HUMAN	sporadic cancers	VAR_005889	p.Leu145Pro
										P04637	P53_HUMAN	sporadic cancers	VAR_005890	p.Leu145Gln
										P04637	P53_HUMAN	sporadic cancers	VAR_044792	p.Leu145Met
										P04637	P53_HUMAN	sporadic cancers	VAR_044793	p.Leu145Arg
										P04637	P53_HUMAN	sporadic cancers	VAR_044794	p.Leu145Val
										P04637	P53_HUMAN	sporadic cancer	VAR_044795	p.Trp146Cys
										P04637	P53_HUMAN	sporadic cancers	VAR_044796	p.Trp146Gly
										P04637	P53_HUMAN	sporadic cancers	VAR_044797	p.Trp146Leu
										P04637	P53_HUMAN	sporadic cancers	VAR_044798	p.Trp146Arg
										P04637	P53_HUMAN	sporadic cancers	VAR_044799	p.Trp146Ser
										P04637	P53_HUMAN	sporadic cancer	VAR_044802	p.Val147Phe
										P04637	P53_HUMAN	sporadic cancers	VAR_005891	p.Val147Asp
										P04637	P53_HUMAN	sporadic cancers	VAR_005892	p.Val147Gly
										P04637	P53_HUMAN	sporadic cancers	VAR_044800	p.Val147Ala
										P04637	P53_HUMAN	sporadic cancers	VAR_044801	p.Val147Glu
										P04637	P53_HUMAN	sporadic cancers	VAR_044803	p.Val147Ile
										P04637	P53_HUMAN	sporadic cancer	VAR_044804	p.Asp148Ala
										P04637	P53_HUMAN	sporadic cancer	VAR_044806	p.Asp148Gly
										P04637	P53_HUMAN	sporadic cancers	VAR_044805	p.Asp148Glu
										P04637	P53_HUMAN	sporadic cancers	VAR_044807	p.Asp148Asn
										P04637	P53_HUMAN	sporadic cancers	VAR_044808	p.Asp148Val
										P04637	P53_HUMAN	sporadic cancers	VAR_044809	p.Asp148Tyr
										P04637	P53_HUMAN	sporadic cancers	VAR_005893	p.Ser149Pro
										P04637	P53_HUMAN	sporadic cancers	VAR_044810	p.Ser149Phe
										P04637	P53_HUMAN	sporadic cancers	VAR_044811	p.Ser149Thr
										P04637	P53_HUMAN	sporadic cancer	VAR_044549	p.Ser15Arg
										P04637	P53_HUMAN	sporadic cancer	VAR_044812	p.Thr150Ala
										P04637	P53_HUMAN	sporadic cancer	VAR_044815	p.Thr150Asn
										P04637	P53_HUMAN	sporadic cancer	VAR_044816	p.Thr150Pro
										P04637	P53_HUMAN	sporadic cancer	VAR_044817	p.Thr150Arg
										P04637	P53_HUMAN	sporadic cancers	VAR_044813	p.Thr150Ile
										P04637	P53_HUMAN	sporadic cancers	VAR_044814	p.Thr150Lys
										P04637	P53_HUMAN	li-fraumeni syndrome	VAR_005895	p.Pro151Ser
										P04637	P53_HUMAN	li-fraumeni syndrome	VAR_005896	p.Pro151Thr
										P04637	P53_HUMAN	sporadic cancers	VAR_005894	p.Pro151Ala
										P04637	P53_HUMAN	sporadic cancers	VAR_044818	p.Pro151His
										P04637	P53_HUMAN	sporadic cancers	VAR_044819	p.Pro151Leu
										P04637	P53_HUMAN	sporadic cancers	VAR_044820	p.Pro151Arg
										P04637	P53_HUMAN	li-fraumeni syndrome	VAR_005897	p.Pro152Leu
										P04637	P53_HUMAN	sporadic cancers	VAR_005898	p.Pro152Ser
										P04637	P53_HUMAN	sporadic cancers	VAR_044821	p.Pro152Ala
										P04637	P53_HUMAN	sporadic cancers	VAR_044822	p.Pro152Gln
										P04637	P53_HUMAN	sporadic cancers	VAR_044823	p.Pro152Arg
										P04637	P53_HUMAN	sporadic cancers	VAR_044824	p.Pro152Thr
										P04637	P53_HUMAN	sporadic cancer	VAR_044826	p.Pro153His
										P04637	P53_HUMAN	sporadic cancer	VAR_044828	p.Pro153Arg
										P04637	P53_HUMAN	sporadic cancer	VAR_045795	p.Pro153Phe
										P04637	P53_HUMAN	sporadic cancers	VAR_005899	p.Pro153Thr
										P04637	P53_HUMAN	sporadic cancers	VAR_044825	p.Pro153Ala
										P04637	P53_HUMAN	sporadic cancers	VAR_044827	p.Pro153Leu
										P04637	P53_HUMAN	sporadic cancers	VAR_044829	p.Pro153Ser
										P04637	P53_HUMAN	sporadic cancer	VAR_044831	p.Gly154Cys
										P04637	P53_HUMAN	sporadic cancers	VAR_044830	p.Gly154Ala
										P04637	P53_HUMAN	sporadic cancers	VAR_044832	p.Gly154Asp
										P04637	P53_HUMAN	sporadic cancers	VAR_044833	p.Gly154Ser
										P04637	P53_HUMAN	sporadic cancers	VAR_045796	p.Gly154Ile
										P04637	P53_HUMAN	li-fraumeni syndrome	VAR_044836	p.Thr155Asn
										P04637	P53_HUMAN	sporadic cancer	VAR_044835	p.Thr155Met
										P04637	P53_HUMAN	sporadic cancers	VAR_005901	p.Thr155Ala
										P04637	P53_HUMAN	sporadic cancers	VAR_044834	p.Thr155Ile
										P04637	P53_HUMAN	sporadic cancers	VAR_044837	p.Thr155Pro
										P04637	P53_HUMAN	sporadic cancers	VAR_044838	p.Thr155Ser
										P04637	P53_HUMAN	li-fraumeni syndrome	VAR_044841	p.Arg156His
										P04637	P53_HUMAN	sporadic cancers	VAR_005902	p.Arg156Pro
										P04637	P53_HUMAN	sporadic cancers	VAR_044839	p.Arg156Cys
										P04637	P53_HUMAN	sporadic cancers	VAR_044840	p.Arg156Gly
										P04637	P53_HUMAN	sporadic cancers	VAR_044842	p.Arg156Leu
										P04637	P53_HUMAN	sporadic cancers	VAR_044843	p.Arg156Ser
										P04637	P53_HUMAN	sporadic cancers	VAR_005903	p.Val157Asp
										P04637	P53_HUMAN	sporadic cancers	VAR_005904	p.Val157Phe
										P04637	P53_HUMAN	sporadic cancers	VAR_012977	p.Val157Ile
										P04637	P53_HUMAN	sporadic cancers	VAR_044844	p.Val157Ala
										P04637	P53_HUMAN	sporadic cancers	VAR_044845	p.Val157Gly
										P04637	P53_HUMAN	sporadic cancers	VAR_044846	p.Val157Leu
										P04637	P53_HUMAN	li-fraumeni syndrome	VAR_005906	p.Arg158Gly
										P04637	P53_HUMAN	li-fraumeni syndrome	VAR_005907	p.Arg158His
										P04637	P53_HUMAN	sporadic cancer	VAR_044849	p.Arg158Gln
										P04637	P53_HUMAN	sporadic cancer	VAR_045797	p.Arg158Phe
										P04637	P53_HUMAN	sporadic cancer	VAR_045798	p.Arg158Tyr
										P04637	P53_HUMAN	sporadic cancers	VAR_005905	p.Arg158Cys
										P04637	P53_HUMAN	sporadic cancers	VAR_044847	p.Arg158Leu
										P04637	P53_HUMAN	sporadic cancers	VAR_044848	p.Arg158Pro
										P04637	P53_HUMAN	sporadic cancers	VAR_044850	p.Arg158Ser
										P04637	P53_HUMAN	sporadic cancer	VAR_045799	p.Ala159Phe
										P04637	P53_HUMAN	sporadic cancers	VAR_044851	p.Ala159Asp
										P04637	P53_HUMAN	sporadic cancers	VAR_044852	p.Ala159Gly
										P04637	P53_HUMAN	sporadic cancers	VAR_044853	p.Ala159Pro
										P04637	P53_HUMAN	sporadic cancers	VAR_044854	p.Ala159Ser
										P04637	P53_HUMAN	sporadic cancers	VAR_044855	p.Ala159Thr
										P04637	P53_HUMAN	sporadic cancers	VAR_044856	p.Ala159Val
										P04637	P53_HUMAN	sporadic cancer	VAR_044550	p.Gln16Leu
										P04637	P53_HUMAN	sporadic cancer	VAR_044858	p.Met160Thr
										P04637	P53_HUMAN	sporadic cancers	VAR_005908	p.Met160Ile
										P04637	P53_HUMAN	sporadic cancers	VAR_044857	p.Met160Lys
										P04637	P53_HUMAN	sporadic cancers	VAR_044859	p.Met160Val
										P04637	P53_HUMAN	sporadic cancer	VAR_045800	p.Ala161Phe
										P04637	P53_HUMAN	sporadic cancers	VAR_005909	p.Ala161Ser
										P04637	P53_HUMAN	sporadic cancers	VAR_044860	p.Ala161Asp
										P04637	P53_HUMAN	sporadic cancers	VAR_044861	p.Ala161Gly
										P04637	P53_HUMAN	sporadic cancers	VAR_044862	p.Ala161Pro
										P04637	P53_HUMAN	sporadic cancers	VAR_044863	p.Ala161Thr
										P04637	P53_HUMAN	sporadic cancers	VAR_044864	p.Ala161Val
										P04637	P53_HUMAN	sporadic cancers	VAR_005910	p.Ile162Ser
										P04637	P53_HUMAN	sporadic cancers	VAR_005911	p.Ile162Val
										P04637	P53_HUMAN	sporadic cancers	VAR_044865	p.Ile162Phe
										P04637	P53_HUMAN	sporadic cancers	VAR_044866	p.Ile162Met
										P04637	P53_HUMAN	sporadic cancers	VAR_044868	p.Ile162Thr
										P04637	P53_HUMAN	sporadic cancer	VAR_044551	p.Glu17Asp
										P04637	P53_HUMAN	sporadic cancers	VAR_005933	p.Cys176Phe
										P04637	P53_HUMAN	sporadic cancers	VAR_005934	p.Cys176Trp
										P04637	P53_HUMAN	sporadic cancers	VAR_044918	p.Cys176Gly
										P04637	P53_HUMAN	sporadic cancers	VAR_044919	p.Cys176Arg
										P04637	P53_HUMAN	sporadic cancers	VAR_044920	p.Cys176Ser
										P04637	P53_HUMAN	sporadic cancers	VAR_044921	p.Cys176Tyr
										P04637	P53_HUMAN	sporadic cancer	VAR_044922	p.Pro177Ala
										P04637	P53_HUMAN	sporadic cancer	VAR_044925	p.Pro177Thr
										P04637	P53_HUMAN	sporadic cancer	VAR_045804	p.Pro177Ile
										P04637	P53_HUMAN	sporadic cancers	VAR_005935	p.Pro177Leu
										P04637	P53_HUMAN	sporadic cancers	VAR_036505	p.Pro177Arg
										P04637	P53_HUMAN	sporadic cancers	VAR_044923	p.Pro177His
										P04637	P53_HUMAN	sporadic cancers	VAR_044924	p.Pro177Ser
										P04637	P53_HUMAN	sporadic cancers	VAR_045803	p.Pro177Phe
										P04637	P53_HUMAN	sporadic cancer	VAR_044927	p.His178Leu
										P04637	P53_HUMAN	sporadic cancers	VAR_044926	p.His178Asp
										P04637	P53_HUMAN	sporadic cancers	VAR_044928	p.His178Asn
										P04637	P53_HUMAN	sporadic cancers	VAR_044929	p.His178Pro
										P04637	P53_HUMAN	sporadic cancers	VAR_044930	p.His178Gln
										P04637	P53_HUMAN	sporadic cancers	VAR_044931	p.His178Arg
										P04637	P53_HUMAN	sporadic cancers	VAR_044932	p.His178Tyr
										P04637	P53_HUMAN	li-fraumeni syndrome	VAR_044939	p.His179Tyr
										P04637	P53_HUMAN	sporadic cancers	VAR_044933	p.His179Asp
										P04637	P53_HUMAN	sporadic cancers	VAR_044934	p.His179Leu
										P04637	P53_HUMAN	sporadic cancers	VAR_044935	p.His179Asn
										P04637	P53_HUMAN	sporadic cancers	VAR_044936	p.His179Pro
										P04637	P53_HUMAN	sporadic cancers	VAR_044937	p.His179Gln
										P04637	P53_HUMAN	sporadic cancers	VAR_044938	p.His179Arg
										P04637	P53_HUMAN	li-fraumeni syndrome	VAR_044943	p.Glu180Lys
										P04637	P53_HUMAN	sporadic cancer	VAR_044940	p.Glu180Ala
										P04637	P53_HUMAN	sporadic cancer	VAR_044942	p.Glu180Gly
										P04637	P53_HUMAN	sporadic cancer	VAR_044945	p.Glu180Val
										P04637	P53_HUMAN	sporadic cancers	VAR_044941	p.Glu180Asp
										P04637	P53_HUMAN	sporadic cancers	VAR_044944	p.Glu180Gln
										P04637	P53_HUMAN	li-fraumeni syndrome	VAR_044946	p.Arg181Cys
										P04637	P53_HUMAN	li-fraumeni syndrome	VAR_044948	p.Arg181His
										P04637	P53_HUMAN	sporadic cancers	VAR_044947	p.Arg181Gly
										P04637	P53_HUMAN	sporadic cancers	VAR_044950	p.Arg181Ser
										P04637	P53_HUMAN	sporadic cancers	VAR_005938	p.Cys182Ser
										P04637	P53_HUMAN	sporadic cancers	VAR_044951	p.Cys182Arg
										P04637	P53_HUMAN	sporadic cancers	VAR_044952	p.Cys182Tyr
										P04637	P53_HUMAN	sporadic cancers	VAR_044953	p.Ser183Leu
										P04637	P53_HUMAN	sporadic cancers	VAR_044954	p.Ser183Pro
										P04637	P53_HUMAN	sporadic cancers	VAR_005939	p.Asp184Tyr
										P04637	P53_HUMAN	sporadic cancers	VAR_044955	p.Asp184Gly
										P04637	P53_HUMAN	sporadic cancers	VAR_044956	p.Asp184His
										P04637	P53_HUMAN	sporadic cancers	VAR_044957	p.Asp184Val
										P04637	P53_HUMAN	sporadic cancers	VAR_047169	p.Asp184Asn
										P04637	P53_HUMAN	sporadic cancer	VAR_044958	p.Ser185Cys
										P04637	P53_HUMAN	sporadic cancer	VAR_044961	p.Ser185Asn
										P04637	P53_HUMAN	sporadic cancer	VAR_044963	p.Ser185Thr
										P04637	P53_HUMAN	sporadic cancers	VAR_044959	p.Ser185Gly
										P04637	P53_HUMAN	sporadic cancers	VAR_044960	p.Ser185Ile
										P04637	P53_HUMAN	sporadic cancers	VAR_044962	p.Ser185Arg
										P04637	P53_HUMAN	sporadic cancer	VAR_005940	p.Asp186Tyr
										P04637	P53_HUMAN	sporadic cancer	VAR_044964	p.Asp186Glu
										P04637	P53_HUMAN	sporadic cancers	VAR_044965	p.Asp186Gly
										P04637	P53_HUMAN	sporadic cancers	VAR_044966	p.Asp186His
										P04637	P53_HUMAN	sporadic cancers	VAR_044967	p.Asp186Asn
										P04637	P53_HUMAN	sporadic cancers	VAR_044968	p.Asp186Val
										P04637	P53_HUMAN	sporadic cancer	VAR_045805	p.Gly187Asn
										P04637	P53_HUMAN	sporadic cancers	VAR_005941	p.Gly187Cys
										P04637	P53_HUMAN	sporadic cancers	VAR_005942	p.Gly187Ser
										P04637	P53_HUMAN	sporadic cancers	VAR_044969	p.Gly187Asp
										P04637	P53_HUMAN	sporadic cancers	VAR_044970	p.Gly187Arg
										P04637	P53_HUMAN	sporadic cancers	VAR_044971	p.Gly187Val
										P04637	P53_HUMAN	sporadic cancer	VAR_044972	p.Leu188Pro
										P04637	P53_HUMAN	sporadic cancers	VAR_044973	p.Leu188Val
										P04637	P53_HUMAN	sporadic cancer	VAR_044974	p.Ala189Asp
										P04637	P53_HUMAN	sporadic cancer	VAR_044976	p.Ala189Ser
										P04637	P53_HUMAN	sporadic cancers	VAR_005943	p.Ala189Pro
										P04637	P53_HUMAN	sporadic cancers	VAR_044975	p.Ala189Gly
										P04637	P53_HUMAN	sporadic cancers	VAR_044977	p.Ala189Thr
										P04637	P53_HUMAN	sporadic cancer	VAR_044980	p.Pro190His
										P04637	P53_HUMAN	sporadic cancers	VAR_005944	p.Pro190Leu
										P04637	P53_HUMAN	sporadic cancers	VAR_044979	p.Pro190Ala
										P04637	P53_HUMAN	sporadic cancers	VAR_044981	p.Pro190Arg
										P04637	P53_HUMAN	sporadic cancers	VAR_044982	p.Pro190Ser
										P04637	P53_HUMAN	sporadic cancers	VAR_044983	p.Pro190Thr
										P04637	P53_HUMAN	sporadic cancer	VAR_045044	p.Glu204Gln
										P04637	P53_HUMAN	sporadic cancer	VAR_045045	p.Glu204Val
										P04637	P53_HUMAN	sporadic cancers	VAR_045040	p.Glu204Ala
										P04637	P53_HUMAN	sporadic cancers	VAR_045041	p.Glu204Asp
										P04637	P53_HUMAN	sporadic cancers	VAR_045042	p.Glu204Gly
										P04637	P53_HUMAN	sporadic cancers	VAR_045043	p.Glu204Lys
										P04637	P53_HUMAN	sporadic cancers	VAR_005953	p.Tyr205Cys
										P04637	P53_HUMAN	sporadic cancers	VAR_005954	p.Tyr205Asp
										P04637	P53_HUMAN	sporadic cancers	VAR_045046	p.Tyr205His
										P04637	P53_HUMAN	sporadic cancers	VAR_045047	p.Tyr205Asn
										P04637	P53_HUMAN	sporadic cancers	VAR_045048	p.Tyr205Ser
										P04637	P53_HUMAN	sporadic cancers	VAR_047175	p.Tyr205Phe
										P04637	P53_HUMAN	sporadic cancer	VAR_045049	p.Leu206Phe
										P04637	P53_HUMAN	sporadic cancer	VAR_045050	p.Leu206Met
										P04637	P53_HUMAN	sporadic cancer	VAR_045055	p.Asp207Val
										P04637	P53_HUMAN	sporadic cancer	VAR_045056	p.Asp207Tyr
										P04637	P53_HUMAN	sporadic cancers	VAR_045051	p.Asp207Glu
										P04637	P53_HUMAN	sporadic cancers	VAR_045052	p.Asp207Gly
										P04637	P53_HUMAN	sporadic cancers	VAR_045053	p.Asp207His
										P04637	P53_HUMAN	sporadic cancers	VAR_045054	p.Asp207Asn
										P04637	P53_HUMAN	sporadic cancer	VAR_045059	p.Asp208His
										P04637	P53_HUMAN	sporadic cancer	VAR_045062	p.Asp208Tyr
										P04637	P53_HUMAN	sporadic cancer	VAR_045809	p.Asp208Ile
										P04637	P53_HUMAN	sporadic cancers	VAR_045057	p.Asp208Glu
										P04637	P53_HUMAN	sporadic cancers	VAR_045058	p.Asp208Gly
										P04637	P53_HUMAN	sporadic cancers	VAR_045060	p.Asp208Asn
										P04637	P53_HUMAN	sporadic cancers	VAR_045061	p.Asp208Val
										P04637	P53_HUMAN	sporadic cancer	VAR_045065	p.Arg209Ser
										P04637	P53_HUMAN	sporadic cancers	VAR_045063	p.Arg209Ile
										P04637	P53_HUMAN	sporadic cancers	VAR_045064	p.Arg209Lys
										P04637	P53_HUMAN	sporadic cancers	VAR_045066	p.Arg209Thr
										P04637	P53_HUMAN	sporadic cancer	VAR_045069	p.Asn210Ile
										P04637	P53_HUMAN	sporadic cancer	VAR_045070	p.Asn210Lys
										P04637	P53_HUMAN	sporadic cancer	VAR_045072	p.Asn210Thr
										P04637	P53_HUMAN	sporadic cancers	VAR_045067	p.Asn210Asp
										P04637	P53_HUMAN	sporadic cancers	VAR_045068	p.Asn210His
										P04637	P53_HUMAN	sporadic cancers	VAR_045071	p.Asn210Ser
										P04637	P53_HUMAN	sporadic cancer	VAR_045077	p.Thr211Pro
										P04637	P53_HUMAN	sporadic cancers	VAR_045074	p.Thr211Ala
										P04637	P53_HUMAN	sporadic cancers	VAR_045075	p.Thr211Ile
										P04637	P53_HUMAN	sporadic cancers	VAR_045076	p.Thr211Asn
										P04637	P53_HUMAN	sporadic cancers	VAR_045078	p.Thr211Ser
										P04637	P53_HUMAN	sporadic cancer	VAR_045082	p.Phe212Val
										P04637	P53_HUMAN	sporadic cancers	VAR_045079	p.Phe212Ile
										P04637	P53_HUMAN	sporadic cancers	VAR_045080	p.Phe212Leu
										P04637	P53_HUMAN	sporadic cancers	VAR_045081	p.Phe212Ser
										P04637	P53_HUMAN	sporadic cancers	VAR_045083	p.Phe212Tyr
										P04637	P53_HUMAN	li-fraumeni syndrome	VAR_005955	p.Arg213Gln
										P04637	P53_HUMAN	li-fraumeni syndrome	VAR_036506	p.Arg213Pro
										P04637	P53_HUMAN	sporadic cancers	VAR_045084	p.Arg213Gly
										P04637	P53_HUMAN	sporadic cancers	VAR_045085	p.Arg213Leu
										P04637	P53_HUMAN	sporadic cancers	VAR_045086	p.Arg213Trp
										P04637	P53_HUMAN	sporadic cancer	VAR_045088	p.His214Pro
										P04637	P53_HUMAN	sporadic cancers	VAR_045087	p.His214Asp
										P04637	P53_HUMAN	sporadic cancers	VAR_045089	p.His214Arg
										P04637	P53_HUMAN	sporadic cancers	VAR_045090	p.His214Tyr
										P04637	P53_HUMAN	sporadic cancers	VAR_047177	p.His214Gln
										P04637	P53_HUMAN	sporadic cancers	VAR_045091	p.Ser215Cys
										P04637	P53_HUMAN	sporadic cancers	VAR_045092	p.Ser215Gly
										P04637	P53_HUMAN	sporadic cancers	VAR_045093	p.Ser215Ile
										P04637	P53_HUMAN	sporadic cancers	VAR_045094	p.Ser215Asn
										P04637	P53_HUMAN	sporadic cancers	VAR_045095	p.Ser215Arg
										P04637	P53_HUMAN	sporadic cancers	VAR_045096	p.Ser215Thr
										P04637	P53_HUMAN	sporadic cancers	VAR_045810	p.Ser215Lys
										P04637	P53_HUMAN	sporadic cancer	VAR_045811	p.Val216Trp
										P04637	P53_HUMAN	sporadic cancers	VAR_005956	p.Val216Met
										P04637	P53_HUMAN	sporadic cancers	VAR_045097	p.Val216Ala
										P04637	P53_HUMAN	sporadic cancers	VAR_045098	p.Val216Glu
										P04637	P53_HUMAN	sporadic cancers	VAR_045099	p.Val216Gly
										P04637	P53_HUMAN	sporadic cancers	VAR_045100	p.Val216Leu
										P04637	P53_HUMAN	sporadic cancer	VAR_045104	p.Val217Ile
										P04637	P53_HUMAN	sporadic cancers	VAR_045101	p.Val217Ala
										P04637	P53_HUMAN	sporadic cancers	VAR_045102	p.Val217Glu
										P04637	P53_HUMAN	sporadic cancers	VAR_045103	p.Val217Gly
										P04637	P53_HUMAN	sporadic cancers	VAR_045105	p.Val217Leu
										P04637	P53_HUMAN	sporadic cancers	VAR_045106	p.Val218Ala
										P04637	P53_HUMAN	sporadic cancers	VAR_045107	p.Val218Glu
										P04637	P53_HUMAN	sporadic cancers	VAR_045108	p.Val218Gly
										P04637	P53_HUMAN	sporadic cancers	VAR_045109	p.Val218Leu
										P04637	P53_HUMAN	sporadic cancers	VAR_045110	p.Val218Met
										P04637	P53_HUMAN	sporadic cancer	VAR_045111	p.Pro219His
										P04637	P53_HUMAN	sporadic cancer	VAR_045113	p.Pro219Arg
										P04637	P53_HUMAN	sporadic cancer	VAR_045812	p.Pro219Cys
										P04637	P53_HUMAN	sporadic cancers	VAR_045112	p.Pro219Leu
										P04637	P53_HUMAN	sporadic cancers	VAR_045115	p.Pro219Thr
										P04637	P53_HUMAN	li-fraumeni syndrome	VAR_005957	p.Tyr220Cys
										P04637	P53_HUMAN	sporadic cancer	VAR_045117	p.Tyr220Phe
										P04637	P53_HUMAN	sporadic cancers	VAR_005958	p.Tyr220His
										P04637	P53_HUMAN	sporadic cancers	VAR_045116	p.Tyr220Asp
										P04637	P53_HUMAN	sporadic cancers	VAR_045118	p.Tyr220Asn
										P04637	P53_HUMAN	sporadic cancers	VAR_045119	p.Glu221Ala
										P04637	P53_HUMAN	sporadic cancers	VAR_045120	p.Glu221Asp
										P04637	P53_HUMAN	sporadic cancers	VAR_045121	p.Glu221Gly
										P04637	P53_HUMAN	sporadic cancers	VAR_045122	p.Glu221Lys
										P04637	P53_HUMAN	sporadic cancers	VAR_045123	p.Glu221Gln
										P04637	P53_HUMAN	sporadic cancer	VAR_045124	p.Pro222Ala
										P04637	P53_HUMAN	sporadic cancer	VAR_045127	p.Pro222Arg
										P04637	P53_HUMAN	sporadic cancers	VAR_045125	p.Pro222Leu
										P04637	P53_HUMAN	sporadic cancers	VAR_045126	p.Pro222Gln
										P04637	P53_HUMAN	sporadic cancers	VAR_045128	p.Pro222Ser
										P04637	P53_HUMAN	sporadic cancers	VAR_045129	p.Pro222Thr
										P04637	P53_HUMAN	sporadic cancer	VAR_044552	p.Lys24Asn
										P04637	P53_HUMAN	sporadic cancer	VAR_045307	p.Gly262Cys
										P04637	P53_HUMAN	sporadic cancer	VAR_045863	p.Gly262His
										P04637	P53_HUMAN	sporadic cancers	VAR_045308	p.Gly262Ser
										P04637	P53_HUMAN	sporadic cancers	VAR_045309	p.Gly262Val
										P04637	P53_HUMAN	sporadic cancers	VAR_047196	p.Gly262Asp
										P04637	P53_HUMAN	sporadic cancer	VAR_045313	p.Asn263Lys
										P04637	P53_HUMAN	sporadic cancer	VAR_045314	p.Asn263Ser
										P04637	P53_HUMAN	sporadic cancers	VAR_045310	p.Asn263Asp
										P04637	P53_HUMAN	sporadic cancers	VAR_045311	p.Asn263His
										P04637	P53_HUMAN	sporadic cancers	VAR_045312	p.Asn263Ile
										P04637	P53_HUMAN	sporadic cancer	VAR_045316	p.Leu264Pro
										P04637	P53_HUMAN	sporadic cancer	VAR_045317	p.Leu264Gln
										P04637	P53_HUMAN	sporadic cancer	VAR_045319	p.Leu264Val
										P04637	P53_HUMAN	sporadic cancers	VAR_045315	p.Leu264Ile
										P04637	P53_HUMAN	sporadic cancers	VAR_045318	p.Leu264Arg
										P04637	P53_HUMAN	li-fraumeni syndrome	VAR_045321	p.Leu265Pro
										P04637	P53_HUMAN	sporadic cancers	VAR_045320	p.Leu265Met
										P04637	P53_HUMAN	sporadic cancers	VAR_045322	p.Leu265Gln
										P04637	P53_HUMAN	sporadic cancers	VAR_047197	p.Leu265Arg
										P04637	P53_HUMAN	sporadic cancers	VAR_045323	p.Gly266Ala
										P04637	P53_HUMAN	sporadic cancers	VAR_045324	p.Gly266Glu
										P04637	P53_HUMAN	sporadic cancers	VAR_045325	p.Gly266Arg
										P04637	P53_HUMAN	sporadic cancers	VAR_045326	p.Gly266Val
										P04637	P53_HUMAN	li-fraumeni syndrome	VAR_045330	p.Arg267Gln
										P04637	P53_HUMAN	sporadic cancer	VAR_045328	p.Arg267His
										P04637	P53_HUMAN	sporadic cancers	VAR_036507	p.Arg267Trp
										P04637	P53_HUMAN	sporadic cancers	VAR_045327	p.Arg267Gly
										P04637	P53_HUMAN	sporadic cancers	VAR_045329	p.Arg267Pro
										P04637	P53_HUMAN	sporadic cancer	VAR_045333	p.Asn268Lys
										P04637	P53_HUMAN	sporadic cancer	VAR_045335	p.Asn268Tyr
										P04637	P53_HUMAN	sporadic cancer	VAR_045864	p.Asn268Phe
										P04637	P53_HUMAN	sporadic cancers	VAR_045331	p.Asn268His
										P04637	P53_HUMAN	sporadic cancers	VAR_045332	p.Asn268Ile
										P04637	P53_HUMAN	sporadic cancers	VAR_045334	p.Asn268Ser
										P04637	P53_HUMAN	sporadic cancer	VAR_045340	p.Ser269Thr
										P04637	P53_HUMAN	sporadic cancer	VAR_047198	p.Ser269Ile
										P04637	P53_HUMAN	sporadic cancers	VAR_045336	p.Ser269Cys
										P04637	P53_HUMAN	sporadic cancers	VAR_045337	p.Ser269Gly
										P04637	P53_HUMAN	sporadic cancers	VAR_045338	p.Ser269Asn
										P04637	P53_HUMAN	sporadic cancers	VAR_045339	p.Ser269Arg
										P04637	P53_HUMAN	sporadic cancers	VAR_045341	p.Phe270Cys
										P04637	P53_HUMAN	sporadic cancers	VAR_045342	p.Phe270Ile
										P04637	P53_HUMAN	sporadic cancers	VAR_045343	p.Phe270Leu
										P04637	P53_HUMAN	sporadic cancers	VAR_045344	p.Phe270Ser
										P04637	P53_HUMAN	sporadic cancers	VAR_045345	p.Phe270Val
										P04637	P53_HUMAN	sporadic cancers	VAR_045346	p.Phe270Tyr
										P04637	P53_HUMAN	sporadic cancer	VAR_045865	p.Glu271Pro
										P04637	P53_HUMAN	sporadic cancer	VAR_045866	p.Glu271Arg
										P04637	P53_HUMAN	sporadic cancers	VAR_036508	p.Glu271Lys
										P04637	P53_HUMAN	sporadic cancers	VAR_045347	p.Glu271Ala
										P04637	P53_HUMAN	sporadic cancers	VAR_045348	p.Glu271Asp
										P04637	P53_HUMAN	sporadic cancers	VAR_045349	p.Glu271Gly
										P04637	P53_HUMAN	sporadic cancers	VAR_045350	p.Glu271Gln
										P04637	P53_HUMAN	li-fraumeni syndrome	VAR_005992	p.Val272Leu
										P04637	P53_HUMAN	sporadic cancers	VAR_045352	p.Val272Glu
										P04637	P53_HUMAN	sporadic cancers	VAR_045353	p.Val272Gly
										P04637	P53_HUMAN	sporadic cancers	VAR_045354	p.Val272Met
										P04637	P53_HUMAN	li-fraumeni syndrome	VAR_005993	p.Arg273Cys
										P04637	P53_HUMAN	li-fraumeni syndrome	VAR_005994	p.Arg273Gly
										P04637	P53_HUMAN	li-fraumeni syndrome	VAR_005995	p.Arg273His
										P04637	P53_HUMAN	li-fraumeni syndrome	VAR_036509	p.Arg273Leu
										P04637	P53_HUMAN	sporadic cancer	VAR_045867	p.Arg273Asn
										P04637	P53_HUMAN	sporadic cancer	VAR_045868	p.Arg273Tyr
										P04637	P53_HUMAN	sporadic cancers	VAR_045355	p.Arg273Pro
										P04637	P53_HUMAN	sporadic cancers	VAR_045356	p.Arg273Gln
										P04637	P53_HUMAN	sporadic cancers	VAR_005997	p.Val274Phe
										P04637	P53_HUMAN	sporadic cancers	VAR_045358	p.Val274Ala
										P04637	P53_HUMAN	sporadic cancers	VAR_045359	p.Val274Asp
										P04637	P53_HUMAN	sporadic cancers	VAR_045360	p.Val274Ile
										P04637	P53_HUMAN	sporadic cancers	VAR_045361	p.Val274Leu
										P04637	P53_HUMAN	sporadic cancers	VAR_047200	p.Val274Gly
										P04637	P53_HUMAN	li-fraumeni syndrome	VAR_005998	p.Cys275Tyr
										P04637	P53_HUMAN	sporadic cancers	VAR_005999	p.Cys275Trp
										P04637	P53_HUMAN	sporadic cancers	VAR_045362	p.Cys275Phe
										P04637	P53_HUMAN	sporadic cancers	VAR_045363	p.Cys275Gly
										P04637	P53_HUMAN	sporadic cancers	VAR_045364	p.Cys275Arg
										P04637	P53_HUMAN	sporadic cancers	VAR_045365	p.Cys275Ser
										P04637	P53_HUMAN	sporadic cancers	VAR_045366	p.Ala276Asp
										P04637	P53_HUMAN	sporadic cancers	VAR_045367	p.Ala276Gly
										P04637	P53_HUMAN	sporadic cancers	VAR_045368	p.Ala276Pro
										P04637	P53_HUMAN	sporadic cancers	VAR_045369	p.Ala276Ser
										P04637	P53_HUMAN	sporadic cancers	VAR_045370	p.Ala276Thr
										P04637	P53_HUMAN	sporadic cancers	VAR_045371	p.Ala276Val
										P04637	P53_HUMAN	sporadic cancers	VAR_006000	p.Cys277Gly
										P04637	P53_HUMAN	sporadic cancers	VAR_045372	p.Cys277Phe
										P04637	P53_HUMAN	sporadic cancers	VAR_045373	p.Cys277Arg
										P04637	P53_HUMAN	sporadic cancers	VAR_045374	p.Cys277Ser
										P04637	P53_HUMAN	sporadic cancers	VAR_047201	p.Cys277Trp
										P04637	P53_HUMAN	li-fraumeni syndrome	VAR_006003	p.Pro278Leu
										P04637	P53_HUMAN	li-fraumeni syndrome	VAR_006004	p.Pro278Ser
										P04637	P53_HUMAN	li-fraumeni syndrome	VAR_006005	p.Pro278Thr
										P04637	P53_HUMAN	sporadic cancers	VAR_006001	p.Pro278Ala
										P04637	P53_HUMAN	sporadic cancers	VAR_006002	p.Pro278His
										P04637	P53_HUMAN	sporadic cancers	VAR_045376	p.Pro278Arg
										P04637	P53_HUMAN	sporadic cancers	VAR_045869	p.Pro278Phe
										P04637	P53_HUMAN	sporadic cancers	VAR_006006	p.Gly279Glu
										P04637	P53_HUMAN	sporadic cancers	VAR_045377	p.Gly279Arg
										P04637	P53_HUMAN	sporadic cancers	VAR_045378	p.Gly279Val
										P04637	P53_HUMAN	sporadic cancers	VAR_045379	p.Gly279Trp
										P04637	P53_HUMAN	sporadic cancer	VAR_044553	p.Glu28Ala
										P04637	P53_HUMAN	sporadic cancer	VAR_045381	p.Arg280Pro
										P04637	P53_HUMAN	sporadic cancers	VAR_006008	p.Arg280Ile
										P04637	P53_HUMAN	sporadic cancers	VAR_006009	p.Arg280Thr
										P04637	P53_HUMAN	sporadic cancers	VAR_045380	p.Arg280Gly
										P04637	P53_HUMAN	sporadic cancers	VAR_045382	p.Arg280Ser
										P04637	P53_HUMAN	li-fraumeni syndrome	VAR_047202	p.Asp281Asn
										P04637	P53_HUMAN	sporadic cancer	VAR_045870	p.Asp281Arg
										P04637	P53_HUMAN	sporadic cancers	VAR_006010	p.Asp281Ala
										P04637	P53_HUMAN	sporadic cancers	VAR_006011	p.Asp281Glu
										P04637	P53_HUMAN	sporadic cancers	VAR_006013	p.Asp281His
										P04637	P53_HUMAN	sporadic cancers	VAR_045383	p.Asp281Tyr
										P04637	P53_HUMAN	li-fraumeni syndrome	VAR_006016	p.Arg282Trp
										P04637	P53_HUMAN	li-fraumeni syndrome	VAR_045384	p.Arg282Gly
										P04637	P53_HUMAN	sporadic cancer	VAR_045385	p.Arg282His
										P04637	P53_HUMAN	sporadic cancers	VAR_006015	p.Arg282Leu
										P04637	P53_HUMAN	sporadic cancers	VAR_045386	p.Arg282Pro
										P04637	P53_HUMAN	li-fraumeni syndrome	VAR_006017	p.Arg283Cys
										P04637	P53_HUMAN	sporadic cancer	VAR_045389	p.Arg283Ser
										P04637	P53_HUMAN	sporadic cancers	VAR_006018	p.Arg283Gly
										P04637	P53_HUMAN	sporadic cancers	VAR_006020	p.Arg283Pro
										P04637	P53_HUMAN	sporadic cancers	VAR_045388	p.Arg283Leu
										P04637	P53_HUMAN	sporadic cancers	VAR_006021	p.Thr284Ala
										P04637	P53_HUMAN	sporadic cancers	VAR_006022	p.Thr284Pro
										P04637	P53_HUMAN	sporadic cancers	VAR_045390	p.Thr284Ile
										P04637	P53_HUMAN	sporadic cancers	VAR_045391	p.Thr284Lys
										P04637	P53_HUMAN	li-fraumeni syndrome	VAR_006024	p.Glu285Gln
										P04637	P53_HUMAN	sporadic cancer	VAR_045392	p.Glu285Ala
										P04637	P53_HUMAN	sporadic cancers	VAR_006023	p.Glu285Lys
										P04637	P53_HUMAN	sporadic cancers	VAR_006025	p.Glu285Val
										P04637	P53_HUMAN	sporadic cancers	VAR_045393	p.Glu285Asp
										P04637	P53_HUMAN	sporadic cancers	VAR_045394	p.Glu285Gly
										P04637	P53_HUMAN	li-fraumeni syndrome	VAR_006026	p.Glu286Ala
										P04637	P53_HUMAN	sporadic cancer	VAR_045871	p.Glu286Leu
										P04637	P53_HUMAN	sporadic cancers	VAR_006027	p.Glu286Asp
										P04637	P53_HUMAN	sporadic cancers	VAR_006028	p.Glu286Gly
										P04637	P53_HUMAN	sporadic cancers	VAR_006029	p.Glu286Lys
										P04637	P53_HUMAN	sporadic cancers	VAR_006030	p.Glu286Gln
										P04637	P53_HUMAN	sporadic cancers	VAR_045395	p.Glu286Val
										P04637	P53_HUMAN	sporadic cancer	VAR_047204	p.Glu287Ala
										P04637	P53_HUMAN	sporadic cancers	VAR_045396	p.Glu287Asp
										P04637	P53_HUMAN	sporadic cancers	VAR_045397	p.Glu287Gly
										P04637	P53_HUMAN	sporadic cancers	VAR_045398	p.Glu287Lys
										P04637	P53_HUMAN	sporadic cancers	VAR_045399	p.Glu287Val
										P04637	P53_HUMAN	sporadic cancer	VAR_045400	p.Asn288Asp
										P04637	P53_HUMAN	sporadic cancers	VAR_045401	p.Asn288Lys
										P04637	P53_HUMAN	sporadic cancers	VAR_045402	p.Asn288Ser
										P04637	P53_HUMAN	sporadic cancers	VAR_045403	p.Asn288Thr
										P04637	P53_HUMAN	sporadic cancers	VAR_045404	p.Asn288Tyr
										P04637	P53_HUMAN	sporadic cancer	VAR_045408	p.Leu289Arg
										P04637	P53_HUMAN	sporadic cancers	VAR_045405	p.Leu289Phe
										P04637	P53_HUMAN	sporadic cancers	VAR_045406	p.Leu289His
										P04637	P53_HUMAN	sporadic cancers	VAR_045407	p.Leu289Pro
										P04637	P53_HUMAN	sporadic cancers	VAR_045409	p.Leu289Val
										P04637	P53_HUMAN	li-fraumeni syndrome	VAR_045411	p.Arg290His
										P04637	P53_HUMAN	li-fraumeni syndrome	VAR_045412	p.Arg290Leu
										P04637	P53_HUMAN	sporadic cancers	VAR_045410	p.Arg290Cys
										P04637	P53_HUMAN	sporadic cancers	VAR_045413	p.Lys291Glu
										P04637	P53_HUMAN	sporadic cancers	VAR_045414	p.Lys291Met
										P04637	P53_HUMAN	sporadic cancers	VAR_045415	p.Lys291Asn
										P04637	P53_HUMAN	sporadic cancers	VAR_045416	p.Lys291Arg
										P04637	P53_HUMAN	sporadic cancers	VAR_045417	p.Lys291Thr
										P04637	P53_HUMAN	sporadic cancers	VAR_047205	p.Lys291Gln
										P04637	P53_HUMAN	sporadic cancer	VAR_045470	p.Lys305Glu
										P04637	P53_HUMAN	sporadic cancer	VAR_045474	p.Lys305Thr
										P04637	P53_HUMAN	sporadic cancers	VAR_045472	p.Lys305Asn
										P04637	P53_HUMAN	sporadic cancers	VAR_045473	p.Lys305Arg
										P04637	P53_HUMAN	li-fraumeni syndrome	VAR_045475	p.Arg306Pro
										P04637	P53_HUMAN	sporadic cancers	VAR_006036	p.Arg306Gln
										P04637	P53_HUMAN	sporadic cancer	VAR_045476	p.Ala307Pro
										P04637	P53_HUMAN	sporadic cancers	VAR_006037	p.Ala307Thr
										P04637	P53_HUMAN	sporadic cancers	VAR_045477	p.Ala307Ser
										P04637	P53_HUMAN	sporadic cancer	VAR_045479	p.Leu308Val
										P04637	P53_HUMAN	sporadic cancers	VAR_045478	p.Leu308Met
										P04637	P53_HUMAN	li-fraumeni syndrome	VAR_006038	p.Pro309Ser
										P04637	P53_HUMAN	sporadic cancer	VAR_045480	p.Pro309Arg
										P04637	P53_HUMAN	sporadic cancers	VAR_044554	p.Val31Ile
										P04637	P53_HUMAN	sporadic cancer	VAR_045481	p.Asn310Ile
										P04637	P53_HUMAN	sporadic cancers	VAR_045482	p.Asn310Thr
										P04637	P53_HUMAN	sporadic cancer	VAR_045484	p.Asn311Lys
										P04637	P53_HUMAN	sporadic cancer	VAR_045485	p.Asn311Ser
										P04637	P53_HUMAN	sporadic cancers	VAR_045483	p.Asn311His
										P04637	P53_HUMAN	sporadic cancers	VAR_045486	p.Asn311Thr
										P04637	P53_HUMAN	sporadic cancers	VAR_045487	p.Thr312Ile
										P04637	P53_HUMAN	sporadic cancers	VAR_045488	p.Thr312Ser
										P04637	P53_HUMAN	sporadic cancer	VAR_045489	p.Ser313Cys
										P04637	P53_HUMAN	sporadic cancer	VAR_045490	p.Ser313Ile
										P04637	P53_HUMAN	sporadic cancer	VAR_045491	p.Ser313Asn
										P04637	P53_HUMAN	sporadic cancer	VAR_045492	p.Ser313Arg
										P04637	P53_HUMAN	sporadic cancer	VAR_045493	p.Ser314Phe
										P04637	P53_HUMAN	sporadic cancer	VAR_045494	p.Ser315Cys
										P04637	P53_HUMAN	sporadic cancer	VAR_045495	p.Ser315Phe
										P04637	P53_HUMAN	sporadic cancer	VAR_045496	p.Ser315Pro
										P04637	P53_HUMAN	sporadic cancer	VAR_045497	p.Pro316Leu
										P04637	P53_HUMAN	sporadic cancer	VAR_045498	p.Pro316Thr
										P04637	P53_HUMAN	sporadic cancer	VAR_045501	p.Gln317Pro
										P04637	P53_HUMAN	sporadic cancer	VAR_047210	p.Gln317Leu
										P04637	P53_HUMAN	sporadic cancers	VAR_045500	p.Gln317Lys
										P04637	P53_HUMAN	sporadic cancers	VAR_045502	p.Gln317Arg
										P04637	P53_HUMAN	sporadic cancers	VAR_045503	p.Pro318Leu
										P04637	P53_HUMAN	sporadic cancer	VAR_045505	p.Lys319Asn
										P04637	P53_HUMAN	sporadic cancer	VAR_045506	p.Lys319Arg
										P04637	P53_HUMAN	sporadic cancers	VAR_045504	p.Lys319Glu
										P04637	P53_HUMAN	sporadic cancers	VAR_045507	p.Lys320Asn
										P04637	P53_HUMAN	kidney cancer	VAR_045508	p.Lys321Glu
										P04637	P53_HUMAN	sporadic cancer	VAR_045509	p.Lys321Arg
										P04637	P53_HUMAN	sporadic cancers	VAR_045510	p.Pro322Leu
										P04637	P53_HUMAN	sporadic cancers	VAR_045511	p.Pro322Arg
										P04637	P53_HUMAN	sporadic cancer	VAR_044555	p.Ser33Thr
										P04637	P53_HUMAN	sporadic cancer	VAR_044556	p.Pro34Leu
										P04637	P53_HUMAN	sporadic cancers	VAR_005852	p.Leu35Phe
										P04637	P53_HUMAN	sporadic cancer	VAR_044557	p.Pro36Leu
										P04637	P53_HUMAN	sporadic cancer	VAR_045563	p.Gly360Val
										P04637	P53_HUMAN	sporadic cancer	VAR_045564	p.Arg363Lys
										P04637	P53_HUMAN	sporadic cancer	VAR_045565	p.Ala364Pro
										P04637	P53_HUMAN	sporadic cancer	VAR_045566	p.Ala364Thr
										P04637	P53_HUMAN	sporadic cancer	VAR_045567	p.Ala364Val
										P04637	P53_HUMAN	sporadic cancer	VAR_047215	p.His365Arg
										P04637	P53_HUMAN	sporadic cancer	VAR_044558	p.Ser37Pro
										P04637	P53_HUMAN	sporadic cancer	VAR_044559	p.Ser37Thr
										P04637	P53_HUMAN	sporadic cancer	VAR_045569	p.Lys370Gln
										P04637	P53_HUMAN	sporadic cancer	VAR_045570	p.Ser376Ala
										P04637	P53_HUMAN	sporadic cancer	VAR_045571	p.Ser376Thr
										P04637	P53_HUMAN	sporadic cancers	VAR_045572	p.Arg379His
										P04637	P53_HUMAN	sporadic cancer	VAR_045573	p.Phe385Leu
										P04637	P53_HUMAN	sporadic cancer	VAR_045574	p.Gly389Trp
										P04637	P53_HUMAN	sporadic cancer	VAR_044560	p.Ala39Pro
										P04637	P53_HUMAN	sporadic cancer	VAR_044561	p.Ala39Val
										P04637	P53_HUMAN	sporadic cancer	VAR_045575	p.Ser392Leu
										P04637	P53_HUMAN	sporadic cancer	VAR_044562	p.Asp42Tyr
										P04637	P53_HUMAN	sporadic cancer	VAR_005853	p.Leu43Ser
										P04637	P53_HUMAN	sporadic cancer	VAR_044563	p.Met44Ile
										P04637	P53_HUMAN	sporadic cancer	VAR_044564	p.Met44Thr
										P04637	P53_HUMAN	sporadic cancer	VAR_044565	p.Met44Val
										P04637	P53_HUMAN	sporadic cancer	VAR_044566	p.Leu45Met
										P04637	P53_HUMAN	sporadic cancers	VAR_044567	p.Ser46Phe
										P04637	P53_HUMAN	sporadic cancers	VAR_044568	p.Ser46Pro
										P04637	P53_HUMAN	sporadic cancers	VAR_044569	p.Pro47Leu
										P04637	P53_HUMAN	sporadic cancer	VAR_044570	p.Asp48Gly
										P04637	P53_HUMAN	sporadic cancer	VAR_044572	p.Asp49Asn
										P04637	P53_HUMAN	sporadic cancers	VAR_044571	p.Asp49His
										P04637	P53_HUMAN	sporadic cancers	VAR_044573	p.Asp49Tyr
										P04637	P53_HUMAN	sporadic cancer	VAR_044543	p.Gln5His
										P04637	P53_HUMAN	sporadic cancer	VAR_044574	p.Gln52His
										P04637	P53_HUMAN	sporadic cancer	VAR_044575	p.Trp53Gly
										P04637	P53_HUMAN	sporadic cancers	VAR_005854	p.Trp53Cys
										P04637	P53_HUMAN	sporadic cancer	VAR_044576	p.Phe54Leu
										P04637	P53_HUMAN	sporadic cancer	VAR_044577	p.Phe54Tyr
										P04637	P53_HUMAN	sporadic cancer	VAR_044579	p.Glu56Val
										P04637	P53_HUMAN	sporadic cancers	VAR_044578	p.Glu56Lys
										P04637	P53_HUMAN	sporadic cancer	VAR_044580	p.Pro58Gln
										P04637	P53_HUMAN	sporadic cancer	VAR_044581	p.Pro58Thr
										P04637	P53_HUMAN	sporadic cancer	VAR_045783	p.Gly59Asn
										P04637	P53_HUMAN	sporadic cancers	VAR_044582	p.Gly59Cys
										P04637	P53_HUMAN	sporadic cancers	VAR_044583	p.Gly59Asp
										P04637	P53_HUMAN	sporadic cancer	VAR_044544	p.Ser6Leu
										P04637	P53_HUMAN	sporadic cancer	VAR_005855	p.Pro60Ser
										P04637	P53_HUMAN	sporadic cancer	VAR_044585	p.Pro60Gln
										P04637	P53_HUMAN	sporadic cancers	VAR_044584	p.Pro60Leu
										P04637	P53_HUMAN	sporadic cancers	VAR_044586	p.Asp61Gly
										P04637	P53_HUMAN	sporadic cancers	VAR_044587	p.Asp61Asn
										P04637	P53_HUMAN	sporadic cancer	VAR_044588	p.Glu62Asp
										P04637	P53_HUMAN	sporadic cancer	VAR_005851	p.Asp7His
										P04637	P53_HUMAN	sporadic cancer	VAR_044608	p.Ala74Thr
										P04637	P53_HUMAN	sporadic cancer	VAR_044611	p.Pro75Ser
										P04637	P53_HUMAN	sporadic cancers	VAR_044609	p.Pro75Leu
										P04637	P53_HUMAN	sporadic cancers	VAR_044610	p.Pro75Arg
										P04637	P53_HUMAN	sporadic cancer	VAR_044612	p.Ala76Gly
										P04637	P53_HUMAN	sporadic cancer	VAR_044613	p.Ala76Thr
										P04637	P53_HUMAN	sporadic cancers	VAR_044614	p.Pro77Ala
										P04637	P53_HUMAN	sporadic cancers	VAR_044615	p.Ala78Val
										P04637	P53_HUMAN	sporadic cancer	VAR_005857	p.Ala79Thr
										P04637	P53_HUMAN	sporadic cancer	VAR_044616	p.Ala79Gly
										P04637	P53_HUMAN	sporadic cancers	VAR_044617	p.Ala79Val
										P04637	P53_HUMAN	sporadic cancer	VAR_044545	p.Pro8Ser
										P04637	P53_HUMAN	sporadic cancer	VAR_044618	p.Pro80Leu
										P04637	P53_HUMAN	sporadic cancer	VAR_044619	p.Pro80Ser
										P04637	P53_HUMAN	sporadic cancers	VAR_044620	p.Thr81Ile
										P04637	P53_HUMAN	li-fraumeni syndrome	VAR_044621	p.Pro82Leu
										P04637	P53_HUMAN	sporadic cancers	VAR_044622	p.Pro82Ser
										P04637	P53_HUMAN	sporadic cancer	VAR_044623	p.Ala83Glu
										P04637	P53_HUMAN	sporadic cancers	VAR_044624	p.Ala83Val
										P04637	P53_HUMAN	sporadic cancers	VAR_044625	p.Ala84Gly
										P04637	P53_HUMAN	sporadic cancers	VAR_044626	p.Ala84Val
										P04637	P53_HUMAN	sporadic cancers	VAR_044627	p.Pro85Leu
										P04637	P53_HUMAN	sporadic cancers	VAR_044628	p.Pro85Ser
										P04637	P53_HUMAN	sporadic cancer	VAR_044629	p.Ala86Val
										P04637	P53_HUMAN	sporadic cancers	VAR_005858	p.Pro87Gln
										P04637	P53_HUMAN	sporadic cancer	VAR_044630	p.Ala88Thr
										P04637	P53_HUMAN	sporadic cancers	VAR_044631	p.Ala88Val
										P04637	P53_HUMAN	sporadic cancer	VAR_044637	p.Pro92Ala
										P04637	P53_HUMAN	sporadic cancer	VAR_044638	p.Pro92Leu
										P04637	P53_HUMAN	sporadic cancer	VAR_044639	p.Pro92Ser
										P04637	P53_HUMAN	sporadic cancer	VAR_044640	p.Leu93Met
										P04637	P53_HUMAN	sporadic cancer	VAR_044641	p.Leu93Pro
										P04637	P53_HUMAN	sporadic cancers	VAR_005859	p.Ser94Thr
										P04637	P53_HUMAN	sporadic cancers	VAR_044642	p.Ser94Leu
										P04637	P53_HUMAN	sporadic cancer	VAR_044644	p.Ser95Thr
										P04637	P53_HUMAN	sporadic cancers	VAR_044643	p.Ser95Phe
										P04637	P53_HUMAN	sporadic cancer	VAR_044645	p.Ser96Cys
										P04637	P53_HUMAN	sporadic cancer	VAR_044647	p.Ser96Pro
										P04637	P53_HUMAN	sporadic cancers	VAR_044646	p.Ser96Phe
										P04637	P53_HUMAN	sporadic cancer	VAR_044648	p.Val97Ala
										P04637	P53_HUMAN	sporadic cancer	VAR_044649	p.Val97Phe
										P04637	P53_HUMAN	sporadic cancers	VAR_044651	p.Pro98Leu
										P04637	P53_HUMAN	sporadic cancers	VAR_044652	p.Pro98Ser
										P04637	P53_HUMAN	sporadic cancer	VAR_044654	p.Ser99Pro
										P04637	P53_HUMAN	sporadic cancers	VAR_044653	p.Ser99Phe
										P04792	HSPB1_HUMAN	neuronopathy, distal hereditary motor, 2b	VAR_018506	p.Arg127Trp
										P04792	HSPB1_HUMAN	charcot-marie-tooth disease 2f	VAR_018507	p.Ser135Phe
										P04792	HSPB1_HUMAN	neuronopathy, distal hereditary motor, 2b	VAR_018507	p.Ser135Phe
										P04792	HSPB1_HUMAN	charcot-marie-tooth disease 2f	VAR_018508	p.Arg136Trp
										P05067	A4_HUMAN	alzheimer disease 1	VAR_044424	p.Asp678Asn
										P05067	A4_HUMAN	alzheimer disease 1	VAR_010109	p.Leu723Pro
										P05089	ARGI1_HUMAN	argininemia	VAR_015594	p.Ile11Thr
										P05106	ITB3_HUMAN	glanzmann thrombasthenia	VAR_004005	p.Ser778Pro
										P05165	PCCA_HUMAN	propionic acidemia type i	VAR_009089	p.Ala138Thr
										P05165	PCCA_HUMAN	propionic acidemia type i	VAR_023843	p.Gly197Glu
										P05165	PCCA_HUMAN	propionic acidemia type i	VAR_023844	p.Cys398Arg
										P05165	PCCA_HUMAN	propionic acidemia type i	VAR_009096	p.Arg399Gln
										P05165	PCCA_HUMAN	propionic acidemia type i	VAR_009100	p.Gly631Arg
										P05166	PCCB_HUMAN	propionic acidemia type ii	VAR_000271	p.Arg44Pro
										P05549	AP2A_HUMAN	branchiooculofacial syndrome	VAR_045839	p.Arg254Gly
										P05549	AP2A_HUMAN	branchiooculofacial syndrome	VAR_045840	p.Arg255Gly
										P05549	AP2A_HUMAN	branchiooculofacial syndrome	VAR_045841	p.Gly262Glu
										P05771	KPCB_HUMAN	glioblastoma multiforme	VAR_042305	p.Val496Met
										P05771	KPCB_HUMAN	glioblastoma multiforme	VAR_042305	p.Val496Met
										P05783	K1C18_HUMAN	cirrhosis	VAR_023054	p.Thr103Ala
										P05783	K1C18_HUMAN	cirrhosis	VAR_003852	p.His128Leu
										P05783	K1C18_HUMAN	cirrhosis	VAR_023056	p.Arg261Gln
										P06132	DCUP_HUMAN	familial porphyria cutanea tarda	VAR_009104	p.Val134Gln
										P06132	DCUP_HUMAN	hepatoerythropoietic porphyria	VAR_009104	p.Val134Gln
										P06132	DCUP_HUMAN	familial porphyria cutanea tarda	VAR_010985	p.Arg142Gln
										P06132	DCUP_HUMAN	familial porphyria cutanea tarda	VAR_022570	p.Arg144Pro
										P06213	INSR_HUMAN	insulin-resistant diabetes mellitus with acanthosis nigricans type a	VAR_015923	p.Ala1055Val
										P06213	INSR_HUMAN	rabson-mendenhall syndrome	VAR_015926	p.Ile1143Thr
										P06213	INSR_HUMAN	insulin resistance	VAR_004097	p.Met1180Ile
										P06213	INSR_HUMAN	diabetes mellitus, non-insulin-dependent	VAR_004098	p.Arg1191Gln
										P06213	INSR_HUMAN	insulin-resistant diabetes mellitus with acanthosis nigricans type a	VAR_015934	p.Arg1378Gln
										P06213	INSR_HUMAN	leprechaunism	VAR_004086	p.Gly393Arg
										P06213	INSR_HUMAN	insulin-resistant diabetes mellitus with acanthosis nigricans type a	VAR_004087	p.Phe409Val
										P06213	INSR_HUMAN	rabson-mendenhall syndrome	VAR_015921	p.Pro997Thr
										P06276	CHLE_HUMAN	butyrylcholinesterase deficiency	VAR_040024	p.Ser226Gly
										P06276	CHLE_HUMAN	butyrylcholinesterase deficiency	VAR_040025	p.Ala227Val
										P06276	CHLE_HUMAN	butyrylcholinesterase deficiency	VAR_040026	p.Ala229Thr
										P06280	AGAL_HUMAN	fabry disease	VAR_012362	p.Ala20Pro
										P06400	RB_HUMAN	childhood cancer retinoblastoma	VAR_005575	p.Arg358Gln
										P06400	RB_HUMAN	childhood cancer retinoblastoma	VAR_010046	p.Arg358Gly
										P06400	RB_HUMAN	childhood cancer retinoblastoma	VAR_005579	p.Ser567Leu
										P06400	RB_HUMAN	childhood cancer retinoblastoma	VAR_011581	p.Lys616Glu
										P06400	RB_HUMAN	childhood cancer retinoblastoma	VAR_005588	p.Asn803Lys
										P06753	TPM3_HUMAN	cap myopathy 1	VAR_070067	p.Arg168Cys
										P06753	TPM3_HUMAN	cap myopathy 1	VAR_070069	p.Arg168His
										P06753	TPM3_HUMAN	myopathy, congenital, with fiber-type disproportion	VAR_070067	p.Arg168Cys
										P06753	TPM3_HUMAN	myopathy, congenital, with fiber-type disproportion	VAR_070068	p.Arg168Gly
										P06753	TPM3_HUMAN	nemaline myopathy 1	VAR_070069	p.Arg168His
										P06753	TPM3_HUMAN	myopathy, congenital, with fiber-type disproportion	VAR_070070	p.Lys169Glu
										P06753	TPM3_HUMAN	myopathy, congenital, with fiber-type disproportion	VAR_070071	p.Arg245Gly
										P06858	LIPL_HUMAN	lipoprotein lipase deficiency	VAR_057922	p.Glu190Gly
										P06858	LIPL_HUMAN	lipoprotein lipase deficiency	VAR_004221	p.Ser199Cys
										P06858	LIPL_HUMAN	lipoprotein lipase deficiency	VAR_057923	p.Asp201Val
										P06858	LIPL_HUMAN	lipoprotein lipase deficiency	VAR_004222	p.Ala203Thr
										P06865	HEXA_HUMAN	gm2-gangliosidosis 1	VAR_003202	p.Pro25Ser
										P07196	NFL_HUMAN	charcot-marie-tooth disease 2e	VAR_016021	p.Pro22Ser
										P07196	NFL_HUMAN	charcot-marie-tooth disease 1f	VAR_016023	p.Asn98Ser
										P07333	CSF1R_HUMAN	lung squamous cell carcinoma	VAR_042042	p.Pro693His
										P07333	CSF1R_HUMAN	leukoencephalopathy, diffuse hereditary, with spheroids	VAR_067409	p.Leu868Pro
										P07333	CSF1R_HUMAN	leukoencephalopathy, diffuse hereditary, with spheroids	VAR_067410	p.Met875Thr
										P07333	CSF1R_HUMAN	leukoencephalopathy, diffuse hereditary, with spheroids	VAR_067411	p.Pro878Thr
										P07737	PROF1_HUMAN	amyotrophic lateral sclerosis 18	VAR_068926	p.Met114Thr
										P07738	PMGE_HUMAN	bisphosphoglycerate mutase deficiency	VAR_065368	p.Arg90Cys
										P07741	APT_HUMAN	adenine phosphoribosyltransferase deficiency	VAR_069051	p.Gly133Asp
										P07741	APT_HUMAN	adenine phosphoribosyltransferase deficiency	VAR_006749	p.Met136Thr
										P07741	APT_HUMAN	adenine phosphoribosyltransferase deficiency	VAR_069049	p.Leu33Pro
										P07741	APT_HUMAN	adenine phosphoribosyltransferase deficiency	VAR_006747	p.Asp65Val
										P07949	RET_HUMAN	hirschsprung disease 1	VAR_009490	p.Leu1061Pro
										P07949	RET_HUMAN	hirschsprung disease 1	VAR_067124	p.Tyr1062Cys
										P07949	RET_HUMAN	hirschsprung disease 1	VAR_009491	p.Met1064Thr
										P07949	RET_HUMAN	renal adysplasia	VAR_044398	p.Pro1067Ser
										P07949	RET_HUMAN	hirschsprung disease 1	VAR_067117	p.Pro679Leu
										P07949	RET_HUMAN	hirschsprung disease 1	VAR_006331	p.Ser690Pro
										P07949	RET_HUMAN	hirschsprung disease 1	VAR_067118	p.Arg694Gln
										P07949	RET_HUMAN	medullary thyroid carcinoma	VAR_009482	p.Leu790Phe
										P07949	RET_HUMAN	multiple neoplasia 2a	VAR_009482	p.Leu790Phe
										P07949	RET_HUMAN	hirschsprung disease 1	VAR_009483	p.Tyr791Phe
										P07949	RET_HUMAN	medullary thyroid carcinoma	VAR_009483	p.Tyr791Phe
										P07949	RET_HUMAN	multiple neoplasia 2a	VAR_009483	p.Tyr791Phe
										P07949	RET_HUMAN	pheochromocytoma	VAR_009483	p.Tyr791Phe
										P07949	RET_HUMAN	medullary thyroid carcinoma	VAR_006336	p.Val804Leu
										P07949	RET_HUMAN	medullary thyroid carcinoma	VAR_006337	p.Val804Met
										P07949	RET_HUMAN	hirschsprung disease 1	VAR_009484	p.Arg813Gln
										P07949	RET_HUMAN	hirschsprung disease 1	VAR_067120	p.Gly830Arg
										P07949	RET_HUMAN	medullary thyroid carcinoma	VAR_009486	p.Ser891Ala
										P07949	RET_HUMAN	hirschsprung disease 1	VAR_006339	p.Phe893Leu
										P07949	RET_HUMAN	renal adysplasia	VAR_044396	p.Gly894Ser
										P07949	RET_HUMAN	hirschsprung disease 1	VAR_006340	p.Arg897Gln
										P07949	RET_HUMAN	hirschsprung disease 1	VAR_006341	p.Lys907Glu
										P07949	RET_HUMAN	hirschsprung disease 1	VAR_067121	p.Lys907Thr
										P07949	RET_HUMAN	hirschsprung disease 1	VAR_006343	p.Glu921Lys
										P07949	RET_HUMAN	medullary thyroid carcinoma	VAR_012745	p.Ser922Phe
										P07949	RET_HUMAN	medullary thyroid carcinoma	VAR_006345	p.Thr946Met
										P07949	RET_HUMAN	multiple neoplasia 2b	VAR_006345	p.Thr946Met
										P07949	RET_HUMAN	hirschsprung disease 1	VAR_006348	p.Met980Thr
										P07951	TPM2_HUMAN	arthrogryposis, distal, 1a	VAR_016086	p.Arg91Gly
										P07954	FUMH_HUMAN	fumarase deficiency	VAR_002446	p.Ala308Thr
										P08034	CXB1_HUMAN	charcot-marie-tooth disease, x-linked dominant, 1	VAR_002133	p.Arg230Cys
										P08034	CXB1_HUMAN	charcot-marie-tooth disease, x-linked dominant, 1	VAR_002134	p.Arg230Leu
										P08034	CXB1_HUMAN	charcot-marie-tooth disease, x-linked dominant, 1	VAR_002135	p.Phe235Cys
										P08034	CXB1_HUMAN	charcot-marie-tooth disease, x-linked dominant, 1	VAR_002136	p.Arg238His
										P08034	CXB1_HUMAN	charcot-marie-tooth disease, x-linked dominant, 1	VAR_029955	p.Leu239Ile
										P08034	CXB1_HUMAN	charcot-marie-tooth disease, x-linked dominant, 1	VAR_029956	p.Arg264Cys
										P08069	IGF1R_HUMAN	lung squamous cell carcinoma	VAR_041428	p.Ala1347Val
										P08069	IGF1R_HUMAN	insulin-like growth factor 1 resistance	VAR_034891	p.Arg138Gln
										P08100	OPSD_HUMAN	retinitis pigmentosa 4	VAR_004830	p.Thr342Met
										P08100	OPSD_HUMAN	retinitis pigmentosa 4	VAR_004831	p.Val345Leu
										P08100	OPSD_HUMAN	retinitis pigmentosa 4	VAR_004832	p.Val345Met
										P08100	OPSD_HUMAN	retinitis pigmentosa 4	VAR_004833	p.Pro347Ala
										P08100	OPSD_HUMAN	retinitis pigmentosa 4	VAR_004834	p.Pro347Leu
										P08100	OPSD_HUMAN	retinitis pigmentosa 4	VAR_004835	p.Pro347Gln
										P08100	OPSD_HUMAN	retinitis pigmentosa 4	VAR_004836	p.Pro347Arg
										P08100	OPSD_HUMAN	retinitis pigmentosa 4	VAR_004837	p.Pro347Ser
										P08397	HEM3_HUMAN	acute intermittent porphyria	VAR_025558	p.Met18Ile
										P08397	HEM3_HUMAN	acute intermittent porphyria	VAR_003638	p.Arg22Cys
										P08514	ITA2B_HUMAN	glanzmann thrombasthenia	VAR_009887	p.Phe320Ser
										P08559	ODPA_HUMAN	pyruvate dehydrogenase e1-alpha deficiency	VAR_004957	p.Thr231Ala
										P08559	ODPA_HUMAN	pyruvate dehydrogenase e1-alpha deficiency	VAR_004957	p.Thr231Ala
										P08559	ODPA_HUMAN	pyruvate dehydrogenase e1-alpha deficiency	VAR_004957	p.Thr231Ala
										P08559	ODPA_HUMAN	pyruvate dehydrogenase e1-alpha deficiency	VAR_004957	p.Thr231Ala
										P08559	ODPA_HUMAN	pyruvate dehydrogenase e1-alpha deficiency	VAR_004957	p.Thr231Ala
										P08559	ODPA_HUMAN	pyruvate dehydrogenase e1-alpha deficiency	VAR_004957	p.Thr231Ala
										P08559	ODPA_HUMAN	pyruvate dehydrogenase e1-alpha deficiency	VAR_004957	p.Thr231Ala
										P08559	ODPA_HUMAN	pyruvate dehydrogenase e1-alpha deficiency	VAR_004957	p.Thr231Ala
										P08559	ODPA_HUMAN	pyruvate dehydrogenase e1-alpha deficiency	VAR_004957	p.Thr231Ala
										P08559	ODPA_HUMAN	pyruvate dehydrogenase e1-alpha deficiency	VAR_004957	p.Thr231Ala
										P08559	ODPA_HUMAN	pyruvate dehydrogenase e1-alpha deficiency	VAR_004957	p.Thr231Ala
										P08559	ODPA_HUMAN	pyruvate dehydrogenase e1-alpha deficiency	VAR_021055	p.Arg288His
										P08559	ODPA_HUMAN	pyruvate dehydrogenase e1-alpha deficiency	VAR_004961	p.His292Leu
										P08559	ODPA_HUMAN	pyruvate dehydrogenase e1-alpha deficiency	VAR_004962	p.Arg302Cys
										P08559	ODPA_HUMAN	pyruvate dehydrogenase e1-alpha deficiency	VAR_004963	p.Arg302His
										P08581	MET_HUMAN	renal cell carcinoma papillary	VAR_032485	p.Val1092Ile
										P08581	MET_HUMAN	renal cell carcinoma papillary	VAR_032486	p.His1094Leu
										P08581	MET_HUMAN	renal cell carcinoma papillary	VAR_032487	p.His1094Arg
										P08581	MET_HUMAN	renal cell carcinoma papillary	VAR_032488	p.His1094Tyr
										P08581	MET_HUMAN	renal cell carcinoma papillary	VAR_006290	p.Asp1228Asn
										P08581	MET_HUMAN	renal cell carcinoma papillary	VAR_006291	p.Asp1228His
										P08581	MET_HUMAN	renal cell carcinoma papillary	VAR_006292	p.Tyr1230Cys
										P08581	MET_HUMAN	renal cell carcinoma papillary	VAR_006293	p.Tyr1230His
										P08581	MET_HUMAN	renal cell carcinoma papillary	VAR_032491	p.Tyr1230Asp
										P08581	MET_HUMAN	case of cancer of unknown primary origin	VAR_064857	p.Val1294Ile
										P08581	MET_HUMAN	gastric cancer	VAR_032483	p.Pro991Ser
										P08581	MET_HUMAN	case of cancer of unknown primary origin	VAR_032484	p.Thr992Ile
										P08779	K1C16_HUMAN	pachyonychia congenita 1	VAR_013837	p.Leu124Arg
										P08779	K1C16_HUMAN	keratoderma, palmoplantar, non-epidermolytic, focal	VAR_009183	p.Asn125Ser
										P08779	K1C16_HUMAN	keratoderma, palmoplantar, non-epidermolytic, focal	VAR_009184	p.Arg127Cys
										P08779	K1C16_HUMAN	pachyonychia congenita 1	VAR_012856	p.Arg127Pro
										P08779	K1C16_HUMAN	pachyonychia congenita 1	VAR_017066	p.Leu128Gln
										P08779	K1C16_HUMAN	pachyonychia congenita 1	VAR_003846	p.Leu132Pro
										P09493	TPM1_HUMAN	cardiomyopathy, familial hypertrophic 3	VAR_007601	p.Asp175Asn
										P09493	TPM1_HUMAN	cardiomyopathy, familial hypertrophic 3	VAR_007602	p.Glu180Gly
										P09493	TPM1_HUMAN	cardiomyopathy, familial hypertrophic 3	VAR_029452	p.Glu180Val
										P09493	TPM1_HUMAN	left ventricular non-compaction 9	VAR_070122	p.Lys248Glu
										P09493	TPM1_HUMAN	cardiomyopathy, dilated 1y	VAR_043987	p.Glu54Lys
										P09493	TPM1_HUMAN	cardiomyopathy, familial hypertrophic 3	VAR_013135	p.Ala63Val
										P09619	PGFRB_HUMAN	gastric adenocarcinoma	VAR_042029	p.Tyr589His
										P10275	ANDR_HUMAN	prostate cancer	VAR_009712	p.Gln112His
										P10275	ANDR_HUMAN	androgen insensitivity syndrome	VAR_009715	p.Gly214Arg
										P10275	ANDR_HUMAN	androgen insensitivity syndrome	VAR_009225	p.Leu255Pro
										P10275	ANDR_HUMAN	prostate cancer	VAR_009716	p.Met266Thr
										P10275	ANDR_HUMAN	prostate cancer	VAR_009717	p.Pro269Ser
										P10275	ANDR_HUMAN	prostate cancer	VAR_009718	p.Pro340Leu
										P10275	ANDR_HUMAN	androgen insensitivity syndrome	VAR_009226	p.Pro390Arg
										P10275	ANDR_HUMAN	androgen insensitivity syndrome	VAR_009227	p.Pro390Ser
										P10275	ANDR_HUMAN	prostate cancer	VAR_009720	p.Asp528Gly
										P10275	ANDR_HUMAN	androgen insensitivity, partial	VAR_009721	p.Leu547Phe
										P10275	ANDR_HUMAN	androgen insensitivity syndrome	VAR_009722	p.Pro548Ser
										P10275	ANDR_HUMAN	androgen insensitivity syndrome	VAR_009727	p.Tyr571Cys
										P10275	ANDR_HUMAN	androgen insensitivity syndrome	VAR_009728	p.Ala573Asp
										P10275	ANDR_HUMAN	prostate cancer	VAR_009729	p.Leu574Pro
										P10275	ANDR_HUMAN	prostate cancer	VAR_009730	p.Thr575Ala
										P10275	ANDR_HUMAN	androgen insensitivity syndrome	VAR_009731	p.Cys576Phe
										P10275	ANDR_HUMAN	androgen insensitivity syndrome	VAR_009732	p.Cys576Arg
										P10275	ANDR_HUMAN	androgen insensitivity syndrome	VAR_009733	p.Cys579Phe
										P10275	ANDR_HUMAN	androgen insensitivity syndrome	VAR_009734	p.Cys579Tyr
										P10275	ANDR_HUMAN	prostate cancer	VAR_009735	p.Lys580Arg
										P10275	ANDR_HUMAN	androgen insensitivity syndrome	VAR_009736	p.Val581Phe
										P10275	ANDR_HUMAN	androgen insensitivity, partial	VAR_009737	p.Phe582Ser
										P10275	ANDR_HUMAN	androgen insensitivity, partial	VAR_009738	p.Phe582Tyr
										P10275	ANDR_HUMAN	androgen insensitivity syndrome	VAR_009740	p.Arg585Lys
										P10275	ANDR_HUMAN	prostate cancer	VAR_009760	p.Ser647Asn
										P10275	ANDR_HUMAN	androgen insensitivity syndrome	VAR_004712	p.Cys784Tyr
										P10275	ANDR_HUMAN	androgen insensitivity syndrome	VAR_004713	p.Met787Val
										P10275	ANDR_HUMAN	androgen insensitivity syndrome	VAR_009822	p.Arg788Ser
										P10275	ANDR_HUMAN	androgen insensitivity syndrome	VAR_009823	p.Leu790Phe
										P10275	ANDR_HUMAN	prostate cancer	VAR_009824	p.Ser791Pro
										P10275	ANDR_HUMAN	androgen insensitivity syndrome	VAR_004714	p.Phe794Ser
										P10275	ANDR_HUMAN	androgen insensitivity syndrome	VAR_004715	p.Gln798Glu
										P10275	ANDR_HUMAN	androgen insensitivity, partial	VAR_004715	p.Gln798Glu
										P10275	ANDR_HUMAN	prostate cancer	VAR_009834	p.Arg846Gly
										P10275	ANDR_HUMAN	androgen insensitivity, partial	VAR_009835	p.Arg854Lys
										P10275	ANDR_HUMAN	androgen insensitivity syndrome	VAR_004725	p.Arg855Cys
										P10275	ANDR_HUMAN	androgen insensitivity syndrome	VAR_004726	p.Arg855His
										P10275	ANDR_HUMAN	androgen insensitivity syndrome	VAR_009836	p.Phe856Leu
										P10415	BCL2_HUMAN	non-hodgkin lymphoma	VAR_000828	p.Pro59Ser
										P10415	BCL2_HUMAN	non-hodgkin lymphoma	VAR_000829	p.Val93Ile
										P10644	KAP0_HUMAN	acrodysostosis 1, with or without hormone resistance	VAR_069456	p.Ala213Thr
										P10644	KAP0_HUMAN	carney complex 1	VAR_046898	p.Ala213Asp
										P10644	KAP0_HUMAN	acrodysostosis 1, with or without hormone resistance	VAR_068241	p.Tyr373His
										P10644	KAP0_HUMAN	acrodysostosis 1, with or without hormone resistance	VAR_069465	p.Tyr373Cys
										P10644	KAP0_HUMAN	carney complex 1	VAR_046895	p.Arg74Cys
										P10721	KIT_HUMAN	gastrointestinal stromal tumor	VAR_033123	p.Lys550Ile
										P10721	KIT_HUMAN	gastrointestinal stromal tumor	VAR_033126	p.Val559Ala
										P10721	KIT_HUMAN	gastrointestinal stromal tumor	VAR_033127	p.Val559Asp
										P10721	KIT_HUMAN	colorectal adenocarcinoma	VAR_042025	p.Asp737Asn
										P10721	KIT_HUMAN	acute myeloid leukemia	VAR_023828	p.Asp816Tyr
										P10721	KIT_HUMAN	germ cell tumor of the testis	VAR_023828	p.Asp816Tyr
										P10721	KIT_HUMAN	mast cell leukemia and mastocytosis	VAR_004109	p.Asp816Val
										P10721	KIT_HUMAN	mastocytosis	VAR_023828	p.Asp816Tyr
										P10721	KIT_HUMAN	mastocytosis	VAR_033133	p.Asp816Phe
										P10721	KIT_HUMAN	testicular tumor	VAR_033134	p.Asp816His
										P10721	KIT_HUMAN	mast cell disease	VAR_033135	p.Asp820Gly
										P10721	KIT_HUMAN	germ cell tumor of the testis	VAR_023829	p.Asn822Lys
										P10721	KIT_HUMAN	germ cell tumor of the testis	VAR_023830	p.Ala829Pro
										P10809	CH60_HUMAN	spastic paraplegia 13, autosomal dominant	VAR_026748	p.Val98Ile
										P10916	MLRV_HUMAN	cardiomyopathy, familial hypertrophic 10	VAR_004601	p.Ala13Thr
										P10916	MLRV_HUMAN	cardiomyopathy, familial hypertrophic 10	VAR_004602	p.Phe18Leu
										P10916	MLRV_HUMAN	cardiomyopathy, familial hypertrophic 10	VAR_004603	p.Glu22Lys
										P11166	GTR1_HUMAN	epilepsy, idiopathic generalized 12	VAR_065215	p.Arg223Pro
										P11166	GTR1_HUMAN	glut1 deficiency syndrome 1	VAR_065216	p.Arg223Trp
										P11166	GTR1_HUMAN	epilepsy, idiopathic generalized 12	VAR_069078	p.Arg232Cys
										P11166	GTR1_HUMAN	glut1 deficiency syndrome 1	VAR_069080	p.Arg468Trp
										P11166	GTR1_HUMAN	glut1 deficiency syndrome 1	VAR_065224	p.Pro485Leu
										P11172	UMPS_HUMAN	orotic aciduria 1	VAR_006810	p.Gly429Arg
										P11362	FGFR1_HUMAN	hypogonadotropic hypogonadism 2 with or without anosmia	VAR_030983	p.Val273Met
										P11362	FGFR1_HUMAN	hypogonadotropic hypogonadism 2 with or without anosmia	VAR_030984	p.Glu274Gly
										P11362	FGFR1_HUMAN	hypogonadotropic hypogonadism 2 with or without anosmia	VAR_017888	p.Cys277Tyr
										P11362	FGFR1_HUMAN	hypogonadotropic hypogonadism 2 with or without anosmia	VAR_030985	p.Pro283Arg
										P11362	FGFR1_HUMAN	trigonocephaly 1	VAR_030986	p.Ile300Thr
										P11362	FGFR1_HUMAN	hypogonadotropic hypogonadism 2 with or without anosmia	VAR_069292	p.Arg470Leu
										P11362	FGFR1_HUMAN	hypogonadotropic hypogonadism 2 with or without anosmia	VAR_017889	p.Val607Met
										P11362	FGFR1_HUMAN	hypogonadotropic hypogonadism 2 with or without anosmia	VAR_069294	p.Ala671Pro
										P11362	FGFR1_HUMAN	hypogonadotropic hypogonadism 2 with or without anosmia	VAR_031003	p.Gly703Arg
										P11362	FGFR1_HUMAN	hypogonadotropic hypogonadism 2 with or without anosmia	VAR_031004	p.Gly703Ser
										P11362	FGFR1_HUMAN	hypogonadotropic hypogonadism 2 with or without anosmia	VAR_031007	p.Asn724Lys
										P11362	FGFR1_HUMAN	hypogonadotropic hypogonadism 2 with or without anosmia	VAR_069959	p.Asp768Tyr
										P11362	FGFR1_HUMAN	hypogonadotropic hypogonadism 2 with or without anosmia	VAR_017892	p.Pro772Ser
										P11387	TOP1_HUMAN	cpt-resistant lung cancer	VAR_007531	p.Thr729Ala
										P11387	TOP1_HUMAN	cpt-resistant lung cancer	VAR_007531	p.Thr729Ala
										P11413	G6PD_HUMAN	anemia, non-spherocytic hemolytic	VAR_002475	p.Arg198Pro
										P11413	G6PD_HUMAN	anemia, non-spherocytic hemolytic	VAR_002500	p.Val394Leu
										P11473	VDR_HUMAN	rickets vitamin d-dependent 2a	VAR_004658	p.Lys45Glu
										P11473	VDR_HUMAN	rickets vitamin d-dependent 2a	VAR_004659	p.Gly46Asp
										P11473	VDR_HUMAN	rickets vitamin d-dependent 2a	VAR_004660	p.Phe47Ile
										P11473	VDR_HUMAN	rickets vitamin d-dependent 2a	VAR_004661	p.Arg50Gln
										P11498	PYC_HUMAN	pyruvate carboxylase deficiency	VAR_058959	p.Tyr304Cys
										P11511	CP19A_HUMAN	aromatase deficiency	VAR_016962	p.Arg365Gln
										P11532	DMD_HUMAN	becker muscular dystrophy	VAR_005172	p.Ala3421Val
										P11802	CDK4_HUMAN	melanoma, cutaneous malignant 3	VAR_006200	p.Arg24Cys
										P11802	CDK4_HUMAN	melanoma, cutaneous malignant 3	VAR_006201	p.Arg24His
										P12110	CO6A2_HUMAN	bethlem myopathy	VAR_058231	p.Gly700Ser
										P12235	ADT1_HUMAN	progressive external ophthalmoplegia with mitochondrial dna deletions, autosomal dominant, 2	VAR_038814	p.Ala90Asp
										P12694	ODBA_HUMAN	maple syrup urine disease 1a	VAR_015101	p.Gly290Arg
										P12694	ODBA_HUMAN	maple syrup urine disease 1a	VAR_069750	p.Arg346Cys
										P12814	ACTN1_HUMAN	bleeding disorder, platelet-type 15	VAR_069915	p.Arg738Trp
										P12830	CADH1_HUMAN	hereditary diffuse gastric cancer	VAR_023358	p.Val832Met
										P12830	CADH1_HUMAN	ovarian carcinoma	VAR_001322	p.Ser838Gly
										P12883	MYH7_HUMAN	cardiomyopathy, dilated 1s	VAR_067260	p.Val1044Ala
										P12883	MYH7_HUMAN	cardiomyopathy, familial hypertrophic 1	VAR_042783	p.Met435Thr
										P12883	MYH7_HUMAN	cardiomyopathy, familial hypertrophic 1	VAR_042784	p.Val440Met
										P12883	MYH7_HUMAN	myopathy, distal, 1	VAR_042785	p.Thr441Met
										P12883	MYH7_HUMAN	cardiomyopathy, familial hypertrophic 1	VAR_019851	p.Ile443Thr
										P12883	MYH7_HUMAN	cardiomyopathy, familial hypertrophic 1	VAR_042786	p.Lys450Glu
										P12883	MYH7_HUMAN	cardiomyopathy, familial hypertrophic 1	VAR_042787	p.Lys450Thr
										P12883	MYH7_HUMAN	cardiomyopathy, familial hypertrophic 1	VAR_004576	p.Arg453Cys
										P12883	MYH7_HUMAN	cardiomyopathy, familial hypertrophic 1	VAR_042788	p.Arg453His
										P12883	MYH7_HUMAN	cardiomyopathy, familial hypertrophic 1	VAR_020814	p.Glu846Gln
										P12883	MYH7_HUMAN	cardiomyopathy, familial hypertrophic 1	VAR_019862	p.Met852Thr
										P12883	MYH7_HUMAN	cardiomyopathy, familial hypertrophic 1	VAR_039563	p.Arg858Cys
										P12883	MYH7_HUMAN	cardiomyopathy, familial hypertrophic 1	VAR_042809	p.Arg858His
										P12883	MYH7_HUMAN	cardiomyopathy, familial hypertrophic 1	VAR_019863	p.Arg869Gly
										P12883	MYH7_HUMAN	cardiomyopathy, familial hypertrophic 1	VAR_020815	p.Arg869Cys
										P12883	MYH7_HUMAN	cardiomyopathy, familial hypertrophic 1	VAR_042810	p.Arg869His
										P12883	MYH7_HUMAN	cardiomyopathy, familial hypertrophic 1	VAR_004592	p.Arg870His
										P12883	MYH7_HUMAN	cardiomyopathy, familial hypertrophic 1	VAR_020816	p.Arg870Cys
										P12955	PEPD_HUMAN	prolidase deficiency	VAR_011614	p.Arg184Gln
										P13569	CFTR_HUMAN	congenital bilateral absence of the vas deferens	VAR_000269	p.Ala1364Val
										P13569	CFTR_HUMAN	cystic fibrosis	VAR_000140	p.Asn287Tyr
										P13569	CFTR_HUMAN	cystic fibrosis	VAR_000141	p.Arg297Gln
										P13569	CFTR_HUMAN	cystic fibrosis	VAR_000167	p.Glu504Gln
										P13569	CFTR_HUMAN	congenital bilateral absence of the vas deferens	VAR_000173	p.Asp513Gly
										P13569	CFTR_HUMAN	cystic fibrosis	VAR_000174	p.Val520Phe
										P13569	CFTR_HUMAN	congenital bilateral absence of the vas deferens	VAR_000175	p.Gly544Val
										P13569	CFTR_HUMAN	cystic fibrosis	VAR_000176	p.Ser549Asn
										P13569	CFTR_HUMAN	cystic fibrosis	VAR_000177	p.Ser549Ile
										P13569	CFTR_HUMAN	cystic fibrosis	VAR_000178	p.Ser549Arg
										P13569	CFTR_HUMAN	cystic fibrosis	VAR_000179	p.Gly551Asp
										P13569	CFTR_HUMAN	cystic fibrosis	VAR_000180	p.Gly551Ser
										P13569	CFTR_HUMAN	cystic fibrosis	VAR_000181	p.Arg553Gln
										P13569	CFTR_HUMAN	cystic fibrosis	VAR_000197	p.Asp579Gly
										P13569	CFTR_HUMAN	cystic fibrosis	VAR_000198	p.Ile601Phe
										P13569	CFTR_HUMAN	cystic fibrosis	VAR_000199	p.Leu610Ser
										P13569	CFTR_HUMAN	cystic fibrosis	VAR_000209	p.Asp648Val
										P13569	CFTR_HUMAN	cystic fibrosis	VAR_000211	p.Thr665Ser
										P13569	CFTR_HUMAN	cystic fibrosis	VAR_000214	p.Val754Met
										P13569	CFTR_HUMAN	congenital bilateral absence of the vas deferens	VAR_000215	p.Arg766Met
										P13569	CFTR_HUMAN	congenital bilateral absence of the vas deferens	VAR_000216	p.Arg792Gly
										P13569	CFTR_HUMAN	congenital bilateral absence of the vas deferens	VAR_000217	p.Ala800Gly
										P13569	CFTR_HUMAN	congenital bilateral absence of the vas deferens	VAR_000218	p.Ile807Met
										P13637	AT1A3_HUMAN	alternating hemiplegia of childhood 2	VAR_068938	p.Asp220Asn
										P13645	K1C10_HUMAN	epidermolytic hyperkeratosis	VAR_003826	p.Asn154His
										P13645	K1C10_HUMAN	epidermolytic hyperkeratosis	VAR_003827	p.Arg156His
										P13645	K1C10_HUMAN	epidermolytic hyperkeratosis	VAR_003828	p.Arg156Cys
										P13645	K1C10_HUMAN	epidermolytic hyperkeratosis	VAR_003829	p.Arg156Pro
										P13645	K1C10_HUMAN	epidermolytic hyperkeratosis	VAR_003830	p.Arg156Ser
										P13645	K1C10_HUMAN	epidermolytic hyperkeratosis	VAR_003831	p.Tyr160Asp
										P13645	K1C10_HUMAN	epidermolytic hyperkeratosis	VAR_010508	p.Tyr160Asn
										P13645	K1C10_HUMAN	epidermolytic hyperkeratosis	VAR_010509	p.Tyr160Ser
										P13645	K1C10_HUMAN	epidermolytic hyperkeratosis	VAR_003832	p.Leu161Ser
										P13647	K2C5_HUMAN	epidermolysis bullosa simplex, dowling-meara type	VAR_010456	p.Leu175Phe
										P13647	K2C5_HUMAN	epidermolysis bullosa simplex, dowling-meara type	VAR_010457	p.Asn176Ser
										P13647	K2C5_HUMAN	epidermolysis bullosa simplex, weber-cockayne type	VAR_026538	p.Asn177Ser
										P13647	K2C5_HUMAN	epidermolysis bullosa simplex, dowling-meara type	VAR_010458	p.Phe179Ser
										P13647	K2C5_HUMAN	epidermolysis bullosa simplex, dowling-meara type	VAR_010459	p.Ser181Pro
										P13647	K2C5_HUMAN	epidermolysis bullosa simplex, koebner type	VAR_013829	p.Val186Leu
										P13647	K2C5_HUMAN	epidermolysis bullosa simplex, koebner type	VAR_031642	p.Val186Met
										P13647	K2C5_HUMAN	epidermolysis bullosa simplex, weber-cockayne type	VAR_031644	p.Arg352Ser
										P13797	PLST_HUMAN	breast cancer	VAR_035462	p.Asp488Ala
										P14136	GFAP_HUMAN	alexander disease	VAR_017471	p.Arg239Cys
										P14136	GFAP_HUMAN	alexander disease	VAR_017472	p.Arg239His
										P14136	GFAP_HUMAN	alexander disease	VAR_017473	p.Ala244Val
										P14416	DRD2_HUMAN	dystonia 11	VAR_017143	p.Val154Ile
										P14598	NCF1_HUMAN	granulomatous disease, chronic, cytochrome-b-positive 1, autosomal recessive	VAR_012476	p.Arg42Gln
										P14859	PO2F1_HUMAN	breast cancer	VAR_035816	p.Ser88Phe
										P14923	PLAK_HUMAN	arrhythmogenic right ventricular dysplasia, familial, 12	VAR_065698	p.Thr19Ile
										P15056	BRAF_HUMAN	colorectal cancer	VAR_018613	p.Arg462Ile
										P15056	BRAF_HUMAN	colorectal cancer	VAR_018614	p.Ile463Ser
										P15056	BRAF_HUMAN	colorectal cancer	VAR_018615	p.Gly464Glu
										P15056	BRAF_HUMAN	colorectal cancer	VAR_018616	p.Gly464Val
										P15056	BRAF_HUMAN	lung cancer	VAR_018512	p.Gly466Val
										P15056	BRAF_HUMAN	melanoma	VAR_018617	p.Gly466Ala
										P15056	BRAF_HUMAN	melanoma	VAR_018618	p.Gly466Glu
										P15056	BRAF_HUMAN	cardiofaciocutaneous syndrome 1	VAR_035096	p.Ser467Ala
										P15056	BRAF_HUMAN	cardiofaciocutaneous syndrome 1	VAR_035097	p.Phe468Ser
										P15056	BRAF_HUMAN	cardiofaciocutaneous syndrome 1	VAR_018621	p.Gly469Glu
										P15056	BRAF_HUMAN	colorectal adenocarcinoma	VAR_040392	p.Gly469Val
										P15056	BRAF_HUMAN	familial non-hodgkin lymphoma	VAR_018620	p.Gly469Ala
										P15056	BRAF_HUMAN	familial non-hodgkin lymphoma	VAR_018622	p.Gly469Arg
										P15056	BRAF_HUMAN	cardiofaciocutaneous syndrome 1	VAR_065173	p.Asn580Asp
										P15056	BRAF_HUMAN	cardiofaciocutaneous syndrome 1	VAR_026119	p.Asn581Asp
										P15056	BRAF_HUMAN	colorectal adenocarcinoma	VAR_040393	p.Asn581Ser
										P15056	BRAF_HUMAN	ovarian cancer	VAR_018623	p.Glu586Lys
										P15056	BRAF_HUMAN	familial non-hodgkin lymphoma	VAR_018624	p.Asp594Gly
										P15056	BRAF_HUMAN	cardiofaciocutaneous syndrome 1	VAR_018625	p.Phe595Leu
										P15056	BRAF_HUMAN	cardiofaciocutaneous syndrome 1	VAR_035098	p.Gly596Val
										P15056	BRAF_HUMAN	colorectal adenocarcinoma	VAR_018626	p.Gly596Arg
										P15056	BRAF_HUMAN	lung cancer	VAR_018513	p.Leu597Arg
										P15056	BRAF_HUMAN	noonan syndrome 7	VAR_018627	p.Leu597Val
										P15056	BRAF_HUMAN	cardiofaciocutaneous syndrome 1	VAR_058628	p.Thr599Arg
										P15056	BRAF_HUMAN	colorectal cancer	VAR_018629	p.Val600Glu
										P15056	BRAF_HUMAN	melanoma	VAR_018628	p.Val600Asp
										P15056	BRAF_HUMAN	cardiofaciocutaneous syndrome 1	VAR_058629	p.Lys601Gln
										P15056	BRAF_HUMAN	colorectal cancer	VAR_018630	p.Lys601Glu
										P15090	FABP4_HUMAN	breast cancer	VAR_036320	p.Glu23Asp
										P15090	FABP4_HUMAN	breast cancer	VAR_036320	p.Glu23Asp
										P15104	GLNA_HUMAN	congenital systemic glutamine deficiency	VAR_026560	p.Arg324Cys
										P15153	RAC2_HUMAN	neutrophil immunodeficiency syndrome	VAR_017452	p.Asp57Asn
										P15259	PGAM2_HUMAN	glycogen storage disease 10	VAR_006088	p.Glu89Ala
										P15259	PGAM2_HUMAN	glycogen storage disease 10	VAR_006089	p.Arg90Trp
										P15259	PGAM2_HUMAN	glycogen storage disease 10	VAR_013103	p.Gly97Asp
										P15382	KCNE1_HUMAN	long qt syndrome 5	VAR_012802	p.Val109Ile
										P15382	KCNE1_HUMAN	long qt syndrome 5	VAR_009907	p.Arg98Trp
										P15531	NDKA_HUMAN	neuroblastoma	VAR_004625	p.Ser120Gly
										P15924	DESP_HUMAN	arrhythmogenic right ventricular dysplasia, familial, 8	VAR_015402	p.Ser299Arg
										P15924	DESP_HUMAN	arrhythmogenic right ventricular dysplasia, familial, 8	VAR_065693	p.Ile445Val
										P15976	GATA1_HUMAN	thrombocytopenia with beta-thalassemia, x-linked	VAR_033114	p.Arg216Gln
										P15976	GATA1_HUMAN	x-linked dyserythropoietic anemia and thrombocytopenia	VAR_012707	p.Asp218Gly
										P15976	GATA1_HUMAN	x-linked dyserythropoietic anemia and thrombocytopenia	VAR_033115	p.Asp218Tyr
										P16220	CREB1_HUMAN	multiple congenital anomalies	VAR_068077	p.Asp116Gly
										P16234	PGFRA_HUMAN	gastrointestinal stromal tumor	VAR_066462	p.Val561Asp
										P16234	PGFRA_HUMAN	hypereosinophilic syndrome	VAR_066463	p.Ile562Met
										P16234	PGFRA_HUMAN	hypereosinophilic syndrome	VAR_066464	p.His570Arg
										P16234	PGFRA_HUMAN	hypereosinophilic syndrome	VAR_066469	p.Arg748Gly
										P16234	PGFRA_HUMAN	gastrointestinal stromal tumor	VAR_066471	p.Asp842Val
										P16234	PGFRA_HUMAN	gastrointestinal stromal tumor	VAR_066472	p.Asp842Tyr
										P16234	PGFRA_HUMAN	gastrointestinal stromal tumor	VAR_066474	p.Tyr849Cys
										P16234	PGFRA_HUMAN	hypereosinophilic syndrome	VAR_066475	p.Tyr849Ser
										P16234	PGFRA_HUMAN	metastatic melanoma	VAR_042036	p.Glu996Lys
										P16278	BGAL_HUMAN	gm1-gangliosidosis 1	VAR_013548	p.His281Tyr
										P16278	BGAL_HUMAN	gm1-gangliosidosis 3	VAR_013548	p.His281Tyr
										P16278	BGAL_HUMAN	gm1-gangliosidosis 1	VAR_003336	p.Arg482His
										P16278	BGAL_HUMAN	mucopolysaccharidosis 4b	VAR_003336	p.Arg482His
										P16278	BGAL_HUMAN	mucopolysaccharidosis 4b	VAR_008678	p.Arg482Cys
										P16278	BGAL_HUMAN	mucopolysaccharidosis 4b	VAR_013552	p.Asn484Lys
										P16278	BGAL_HUMAN	gm1-gangliosidosis 1	VAR_008679	p.Asp491Asn
										P16278	BGAL_HUMAN	gm1-gangliosidosis 1	VAR_037943	p.Asp491Tyr
										P16278	BGAL_HUMAN	gm1-gangliosidosis 1	VAR_013553	p.Gly494Cys
										P16278	BGAL_HUMAN	mucopolysaccharidosis 4b	VAR_062369	p.Gly494Ser
										P16591	FER_HUMAN	ovarian endometrioid carcinoma	VAR_041692	p.Glu404Gln
										P16615	AT2A2_HUMAN	darier disease	VAR_008614	p.Ser186Pro
										P16615	AT2A2_HUMAN	darier disease	VAR_008616	p.Val223Met
										P16615	AT2A2_HUMAN	darier disease	VAR_008609	p.Asn39Thr
										P16671	CD36_HUMAN	platelet glycoprotein iv deficiency	VAR_017913	p.Pro90Ser
										P17050	NAGAB_HUMAN	schindler disease	VAR_000497	p.Glu325Lys
										P17050	NAGAB_HUMAN	kanzaki disease	VAR_000498	p.Arg329Trp
										P17050	NAGAB_HUMAN	kanzaki disease	VAR_022525	p.Arg329Gln
										P17302	CXA1_HUMAN	congenital heart malformations	VAR_059011	p.Ser251Thr
										P17302	CXA1_HUMAN	congenital heart malformations	VAR_059012	p.Ala253Pro
										P17302	CXA1_HUMAN	congenital heart malformations	VAR_014101	p.Pro283Leu
										P17302	CXA1_HUMAN	congenital heart malformations	VAR_014102	p.Thr290Asn
										P17302	CXA1_HUMAN	atrioventricular septal defect 3	VAR_032924	p.Arg362Gln
										P17302	CXA1_HUMAN	hypoplastic left heart syndrome 1	VAR_032924	p.Arg362Gln
										P17302	CXA1_HUMAN	heart malformations	VAR_059015	p.Ser364Pro
										P17302	CXA1_HUMAN	heart malformations	VAR_059016	p.Ser365Asn
										P17302	CXA1_HUMAN	atrioventricular septal defect 3	VAR_032925	p.Arg376Gln
										P17302	CXA1_HUMAN	hypoplastic left heart syndrome 1	VAR_032925	p.Arg376Gln
										P17405	ASM_HUMAN	niemann-pick disease b	VAR_060924	p.His514Gln
										P17405	ASM_HUMAN	niemann-pick disease b	VAR_060925	p.Glu515Val
										P17661	DESM_HUMAN	myopathy, myofibrillar, 1	VAR_067208	p.Ser13Phe
										P17661	DESM_HUMAN	myopathy, myofibrillar, 1	VAR_018771	p.Leu385Pro
										P17661	DESM_HUMAN	myopathy, myofibrillar, 1	VAR_018772	p.Gln389Pro
										P17661	DESM_HUMAN	myopathy, myofibrillar, 1	VAR_007902	p.Asn393Ile
										P17661	DESM_HUMAN	myopathy, myofibrillar, 1	VAR_042460	p.Lys449Met
										P17661	DESM_HUMAN	myopathy, myofibrillar, 1	VAR_042461	p.Lys449Thr
										P17661	DESM_HUMAN	cardiomyopathy, dilated 1i	VAR_018773	p.Ile451Met
										P17661	DESM_HUMAN	myopathy, myofibrillar, 1	VAR_018773	p.Ile451Met
										P17661	DESM_HUMAN	myopathy, myofibrillar, 1	VAR_042462	p.Arg454Trp
										P17661	DESM_HUMAN	myopathy, myofibrillar, 1	VAR_067207	p.Ser7Phe
										P18077	RL35A_HUMAN	diamond-blackfan anemia 5	VAR_055447	p.Val33Ile
										P18206	VINC_HUMAN	cardiomyopathy, familial hypertrophic 15	VAR_035101	p.Leu277Met
										P19235	EPOR_HUMAN	erythrocytosis, familial, 1	VAR_027372	p.Asn487Ser
										P19235	EPOR_HUMAN	erythrocytosis, familial, 1	VAR_027373	p.Pro488Ser
										P19429	TNNI3_HUMAN	cardiomyopathy, familial hypertrophic 7	VAR_019872	p.Arg141Gln
										P19429	TNNI3_HUMAN	cardiomyopathy, familial restrictive 1	VAR_016079	p.Leu144Gln
										P19429	TNNI3_HUMAN	cardiomyopathy, familial hypertrophic 7	VAR_007603	p.Arg145Gly
										P19429	TNNI3_HUMAN	cardiomyopathy, familial restrictive 1	VAR_016080	p.Arg145Trp
										P19429	TNNI3_HUMAN	cardiomyopathy, familial hypertrophic 7	VAR_019873	p.Ala157Val
										P19429	TNNI3_HUMAN	cardiomyopathy, familial hypertrophic 7	VAR_019874	p.Arg162Pro
										P19429	TNNI3_HUMAN	cardiomyopathy, familial hypertrophic 7	VAR_042745	p.Arg162Gln
										P19429	TNNI3_HUMAN	cardiomyopathy, familial hypertrophic 7	VAR_029454	p.Ser166Phe
										P19429	TNNI3_HUMAN	cardiomyopathy, familial restrictive 1	VAR_016081	p.Ala171Thr
										P19429	TNNI3_HUMAN	cardiomyopathy, dilated 1ff	VAR_063548	p.Lys36Gln
										P19429	TNNI3_HUMAN	cardiomyopathy, familial hypertrophic 7	VAR_016078	p.Pro82Ser
										P19525	E2AK2_HUMAN	lung adenocarcinoma	VAR_040475	p.Leu439Val
										P19544	WT1_HUMAN	denys-drash syndrome	VAR_007744	p.Cys360Gly
										P19544	WT1_HUMAN	denys-drash syndrome	VAR_043800	p.Cys360Tyr
										P19544	WT1_HUMAN	nephrotic syndrome 4	VAR_043801	p.Phe364Leu
										P19544	WT1_HUMAN	denys-drash syndrome	VAR_007745	p.Arg366Cys
										P19544	WT1_HUMAN	denys-drash syndrome	VAR_007746	p.Arg366His
										P19544	WT1_HUMAN	denys-drash syndrome	VAR_043802	p.Arg366Leu
										P19544	WT1_HUMAN	meacham syndrome	VAR_007745	p.Arg366Cys
										P19544	WT1_HUMAN	wilms tumor 1	VAR_007745	p.Arg366Cys
										P19544	WT1_HUMAN	wilms tumor 1	VAR_007746	p.Arg366His
										P19544	WT1_HUMAN	denys-drash syndrome	VAR_043803	p.Gln369Pro
										P19544	WT1_HUMAN	denys-drash syndrome	VAR_015059	p.Cys388Phe
										P19544	WT1_HUMAN	denys-drash syndrome	VAR_043806	p.Cys388Tyr
										P19544	WT1_HUMAN	nephrotic syndrome 4	VAR_043805	p.Cys388Arg
										P19544	WT1_HUMAN	frasier syndrome	VAR_015060	p.Phe392Leu
										P19544	WT1_HUMAN	denys-drash syndrome	VAR_007750	p.Arg394Trp
										P19544	WT1_HUMAN	denys-drash syndrome	VAR_015061	p.Arg394Gln
										P19544	WT1_HUMAN	denys-drash syndrome	VAR_043808	p.Arg394Pro
										P19544	WT1_HUMAN	meacham syndrome	VAR_007750	p.Arg394Trp
										P19544	WT1_HUMAN	wilms tumor 1	VAR_007750	p.Arg394Trp
										P19544	WT1_HUMAN	wilms tumor 1	VAR_043807	p.Arg394Leu
										P19544	WT1_HUMAN	denys-drash syndrome	VAR_007751	p.Asp396Asn
										P19544	WT1_HUMAN	denys-drash syndrome	VAR_007752	p.Asp396Gly
										P19544	WT1_HUMAN	denys-drash syndrome	VAR_043809	p.Asp396Tyr
										P19544	WT1_HUMAN	nephrotic syndrome 4	VAR_007751	p.Asp396Asn
										P19544	WT1_HUMAN	nephrotic syndrome 4	VAR_043810	p.His397Pro
										P19544	WT1_HUMAN	denys-drash syndrome	VAR_015062	p.Leu398Pro
										P20794	MAK_HUMAN	retinitis pigmentosa 62	VAR_066991	p.Arg166His
										P20807	CAN3_HUMAN	limb-girdle muscular dystrophy 2a	VAR_009573	p.Arg437Cys
										P20823	HNF1A_HUMAN	diabetes mellitus, insulin-dependent, 20	VAR_010557	p.Cys241Gly
										P20823	HNF1A_HUMAN	maturity-onset diabetes of the young 3	VAR_010557	p.Cys241Gly
										P20823	HNF1A_HUMAN	hepatic adenoma	VAR_033093	p.Arg244Gly
										P20823	HNF1A_HUMAN	hepatic adenoma	VAR_033093	p.Arg244Gly
										P20823	HNF1A_HUMAN	hepatocellular carcinoma	VAR_033094	p.Gln250Pro
										P20823	HNF1A_HUMAN	hepatocellular carcinoma	VAR_033094	p.Gln250Pro
										P20823	HNF1A_HUMAN	late-onset niddm	VAR_010558	p.Leu254Met
										P20823	HNF1A_HUMAN	late-onset niddm	VAR_010558	p.Leu254Met
										P21333	FLNA_HUMAN	fg syndrome 2	VAR_058721	p.Pro1291Leu
										P21333	FLNA_HUMAN	frontometaphyseal dysplasia	VAR_031312	p.Gly1728Cys
										P21359	NF1_HUMAN	neurofibromatosis-noonan syndrome	VAR_032475	p.Asn1451Thr
										P21359	NF1_HUMAN	neurofibromatosis-noonan syndrome	VAR_032476	p.Val1453Leu
										P21359	NF1_HUMAN	neurofibromatosis 1	VAR_002665	p.Tyr2192Asn
										P21359	NF1_HUMAN	neurofibromatosis 1	VAR_021766	p.Thr2507Ile
										P21549	SPYA_HUMAN	hyperoxaluria primary 1	VAR_060562	p.Cys253Arg
										P21549	SPYA_HUMAN	hyperoxaluria primary 1	VAR_060569	p.Leu298Pro
										P21802	FGFR2_HUMAN	crouzon syndrome	VAR_004134	p.Tyr340His
										P21802	FGFR2_HUMAN	pfeiffer syndrome	VAR_017269	p.Tyr340Cys
										P21802	FGFR2_HUMAN	crouzon syndrome	VAR_004135	p.Thr341Pro
										P21802	FGFR2_HUMAN	pfeiffer syndrome	VAR_004135	p.Thr341Pro
										P21802	FGFR2_HUMAN	antley-bixler syndrome, without genital anomalies or disordered steroidogenesis	VAR_004137	p.Cys342Arg
										P21802	FGFR2_HUMAN	antley-bixler syndrome, without genital anomalies or disordered steroidogenesis	VAR_004138	p.Cys342Ser
										P21802	FGFR2_HUMAN	crouzon syndrome	VAR_004136	p.Cys342Phe
										P21802	FGFR2_HUMAN	crouzon syndrome	VAR_004137	p.Cys342Arg
										P21802	FGFR2_HUMAN	crouzon syndrome	VAR_004138	p.Cys342Ser
										P21802	FGFR2_HUMAN	crouzon syndrome	VAR_004139	p.Cys342Tyr
										P21802	FGFR2_HUMAN	crouzon syndrome	VAR_017271	p.Cys342Trp
										P21802	FGFR2_HUMAN	jackson-weiss syndrome	VAR_004137	p.Cys342Arg
										P21802	FGFR2_HUMAN	jackson-weiss syndrome	VAR_004138	p.Cys342Ser
										P21802	FGFR2_HUMAN	pfeiffer syndrome	VAR_004137	p.Cys342Arg
										P21802	FGFR2_HUMAN	pfeiffer syndrome	VAR_004138	p.Cys342Ser
										P21802	FGFR2_HUMAN	pfeiffer syndrome	VAR_004139	p.Cys342Tyr
										P21802	FGFR2_HUMAN	pfeiffer syndrome	VAR_017270	p.Cys342Gly
										P21802	FGFR2_HUMAN	crouzon syndrome	VAR_004140	p.Ala344Gly
										P21802	FGFR2_HUMAN	crouzon syndrome	VAR_004141	p.Ala344Pro
										P21802	FGFR2_HUMAN	jackson-weiss syndrome	VAR_004140	p.Ala344Gly
										P21802	FGFR2_HUMAN	pfeiffer syndrome	VAR_004141	p.Ala344Pro
										P21802	FGFR2_HUMAN	crouzon syndrome	VAR_004142	p.Ser347Cys
										P21802	FGFR2_HUMAN	antley-bixler syndrome, without genital anomalies or disordered steroidogenesis	VAR_004143	p.Ser351Cys
										P21802	FGFR2_HUMAN	crouzon syndrome	VAR_004143	p.Ser351Cys
										P21802	FGFR2_HUMAN	pfeiffer syndrome	VAR_004143	p.Ser351Cys
										P21802	FGFR2_HUMAN	crouzon syndrome	VAR_004144	p.Ser354Cys
										P21802	FGFR2_HUMAN	crouzon syndrome	VAR_017272	p.Ser354Tyr
										P21802	FGFR2_HUMAN	craniosynostosis	VAR_017279	p.Lys659Asn
										P21802	FGFR2_HUMAN	pfeiffer syndrome	VAR_017280	p.Gly663Glu
										P21817	RYR1_HUMAN	central core disease of muscle	VAR_045724	p.Ala2421Pro
										P21817	RYR1_HUMAN	central core disease of muscle	VAR_032915	p.Met2423Lys
										P21817	RYR1_HUMAN	multiminicore disease with external ophthalmoplegia	VAR_032915	p.Met2423Lys
										P21817	RYR1_HUMAN	malignant hyperthermia 1	VAR_045725	p.Ala2428Thr
										P21817	RYR1_HUMAN	malignant hyperthermia 1	VAR_045726	p.Asp2431Asn
										P21817	RYR1_HUMAN	central core disease of muscle	VAR_045762	p.Arg4861Cys
										P21817	RYR1_HUMAN	central core disease of muscle	VAR_045763	p.Arg4861His
										P21817	RYR1_HUMAN	central core disease of muscle	VAR_045765	p.Tyr4864Cys
										P22033	MUTA_HUMAN	methylmalonic aciduria type mut	VAR_004412	p.Arg228Gln
										P22033	MUTA_HUMAN	methylmalonic aciduria type mut	VAR_026603	p.Thr230Ile
										P22033	MUTA_HUMAN	methylmalonic aciduria type mut	VAR_004413	p.Tyr231Asn
										P22413	ENPP1_HUMAN	arterial calcification of infancy, generalized, 1	VAR_067910	p.Pro250Leu
										P22413	ENPP1_HUMAN	ossification of the posterior longitudinal ligament of the spine	VAR_014143	p.Ser287Phe
										P22607	FGFR3_HUMAN	achondroplasia	VAR_004161	p.Lys650Met
										P22607	FGFR3_HUMAN	bladder cancer	VAR_018390	p.Lys650Gln
										P22607	FGFR3_HUMAN	hypochondroplasia	VAR_018390	p.Lys650Gln
										P22607	FGFR3_HUMAN	keratosis, seborrheic	VAR_004160	p.Lys650Glu
										P22607	FGFR3_HUMAN	keratosis, seborrheic	VAR_004161	p.Lys650Met
										P22607	FGFR3_HUMAN	testicular germ cell tumor	VAR_004160	p.Lys650Glu
										P22607	FGFR3_HUMAN	thanatophoric dysplasia 1	VAR_004161	p.Lys650Met
										P22607	FGFR3_HUMAN	thanatophoric dysplasia 2	VAR_004160	p.Lys650Glu
										P22681	CBL_HUMAN	noonan syndrome-like disorder with or without juvenile myelomonocytic leukemia	VAR_064332	p.Gln367Pro
										P22695	QCR2_HUMAN	colorectal cancer	VAR_036479	p.Phe208Tyr
										P22735	TGM1_HUMAN	ichthyosis, congenital, autosomal recessive 1	VAR_058639	p.Gly94Asp
										P23352	KALM_HUMAN	hypogonadotropic hypogonadism 1 with or without anosmia	VAR_031013	p.Cys172Arg
										P23508	CRCM_HUMAN	colorectal cancer	VAR_005142	p.Pro486Leu
										P23508	CRCM_HUMAN	colorectal cancer	VAR_005143	p.Ser490Leu
										P23588	IF4B_HUMAN	renal cell carcinoma case	VAR_064710	p.Pro203Arg
										P23769	GATA2_HUMAN	dendritic cell monocyte lymphocyte b and natural killer lymphocyte deficiency	VAR_066407	p.Arg398Trp
										P23786	CPT2_HUMAN	carnitine palmitoyltransferase 2 deficiency late-onset	VAR_020541	p.Tyr210Asp
										P23786	CPT2_HUMAN	carnitine palmitoyltransferase 2 deficiency late-onset	VAR_037976	p.Asp213Gly
										P23786	CPT2_HUMAN	carnitine palmitoyltransferase 2 deficiency late-onset	VAR_007966	p.Met214Thr
										P23786	CPT2_HUMAN	carnitine palmitoyltransferase 2 deficiency late-onset	VAR_007967	p.Pro227Leu
										P23786	CPT2_HUMAN	carnitine palmitoyltransferase 2 deficiency late-onset	VAR_001391	p.Pro50His
										P24347	MMP11_HUMAN	colorectal cancer	VAR_036140	p.Asp166Asn
										P24530	EDNRB_HUMAN	hirschsprung disease 2	VAR_003472	p.Ser305Asn
										P24941	CDK2_HUMAN	glioblastoma multiforme	VAR_041972	p.Pro45Leu
										P25054	APC_HUMAN	colorectal tumor	VAR_005040	p.Tyr1027Cys
										P25054	APC_HUMAN	hepatoblastoma	VAR_065133	p.Ser1395Cys
										P25054	APC_HUMAN	medulloblastoma	VAR_017655	p.Ser1495Gly
										P25054	APC_HUMAN	familial adenomatous polyposis	VAR_005056	p.Ser2621Cys
										P25054	APC_HUMAN	familial adenomatous polyposis	VAR_005057	p.Leu2839Phe
										P25054	APC_HUMAN	familial adenomatous polyposis	VAR_009614	p.Ser722Gly
										P25054	APC_HUMAN	familial adenomatous polyposis	VAR_005034	p.Ser784Thr
										P25054	APC_HUMAN	gastric cancer	VAR_005036	p.Ile880Thr
										P25054	APC_HUMAN	colorectal carcinoma	VAR_012975	p.Val890Ile
										P25054	APC_HUMAN	colorectal tumor	VAR_005037	p.Ser906Tyr
										P25189	MYP0_HUMAN	dejerine-sottas syndrome	VAR_031892	p.Ala221Thr
										P25189	MYP0_HUMAN	charcot-marie-tooth disease 1b	VAR_054397	p.Asp224Tyr
										P25189	MYP0_HUMAN	charcot-marie-tooth disease 1b	VAR_054398	p.Arg227Ser
										P25189	MYP0_HUMAN	charcot-marie-tooth disease 2i	VAR_021610	p.Lys236Glu
										P25440	BRD2_HUMAN	glioblastoma multiforme	VAR_041904	p.Gly30Glu
										P25445	TNR6_HUMAN	non-hodgkin lymphoma	VAR_013422	p.Thr198Ile
										P25445	TNR6_HUMAN	autoimmune lymphoproliferative syndrome 1a	VAR_013423	p.Tyr232Cys
										P25963	IKBA_HUMAN	ectodermal dysplasia, anhidrotic, with t-cell immunodeficiency autosomal dominant	VAR_034871	p.Ser32Ile
										P26367	PAX6_HUMAN	aniridia	VAR_015066	p.Pro375Gln
										P26367	PAX6_HUMAN	optic nerve aplasia	VAR_017545	p.Gln378Arg
										P26678	PPLA_HUMAN	cardiomyopathy, dilated 1p	VAR_025989	p.Arg9Cys
										P27708	PYR1_HUMAN	colorectal cancer	VAR_035897	p.Arg177Gln
										P28329	CLAT_HUMAN	myasthenic syndrome, congenital, associated with episodic apnea	VAR_011671	p.Arg482Gly
										P28329	CLAT_HUMAN	myasthenic syndrome, congenital, associated with episodic apnea	VAR_011674	p.Arg560His
										P28340	DPOD1_HUMAN	colorectal	VAR_069336	p.Pro787Leu
										P28799	GRN_HUMAN	ubiquitin-positive frontotemporal dementia	VAR_044451	p.Ala9Asp
										P29033	CXB2_HUMAN	deafness, autosomal recessive, 1a	VAR_023611	p.Glu129Lys
										P29033	CXB2_HUMAN	deafness, autosomal recessive, 1a	VAR_023613	p.Val178Ala
										P29033	CXB2_HUMAN	deafness, autosomal dominant, 3a	VAR_032752	p.Asp179Asn
										P29033	CXB2_HUMAN	deafness, autosomal dominant, 3a	VAR_023614	p.Arg184Gln
										P29033	CXB2_HUMAN	deafness, autosomal recessive, 1a	VAR_009969	p.Arg184Trp
										P29033	CXB2_HUMAN	deafness, autosomal recessive, 1a	VAR_015943	p.Arg184Pro
										P29317	EPHA2_HUMAN	gastric adenocarcinoma	VAR_042124	p.Gly777Ser
										P29317	EPHA2_HUMAN	cataract 6, multiple types	VAR_058907	p.Thr940Ile
										P29320	EPHA3_HUMAN	lung adenocarcinoma	VAR_042132	p.Gly766Glu
										P29320	EPHA3_HUMAN	lung carcinoma	VAR_065832	p.Thr933Met
										P29323	EPHB2_HUMAN	prostate cancer	VAR_032853	p.Arg199His
										P29323	EPHB2_HUMAN	prostate cancer	VAR_032858	p.Ile909Met
										P29400	CO4A5_HUMAN	alport syndrome, x-linked	VAR_007994	p.Gly545Arg
										P29400	CO4A5_HUMAN	alport syndrome, x-linked	VAR_007995	p.Gly545Val
										P30154	2AAB_HUMAN	lung cancer	VAR_022897	p.Pro65Ser
										P30260	CDC27_HUMAN	breast cancer	VAR_035861	p.Gly270Ala
										P30518	V2R_HUMAN	diabetes insipidus, nephrogenic, x-linked	VAR_003523	p.Cys112Arg
										P30518	V2R_HUMAN	diabetes insipidus, nephrogenic, x-linked	VAR_015317	p.Cys112Tyr
										P30518	V2R_HUMAN	diabetes insipidus, nephrogenic, x-linked	VAR_003524	p.Arg113Trp
										P30518	V2R_HUMAN	diabetes insipidus, nephrogenic, x-linked	VAR_015318	p.Gly122Arg
										P30518	V2R_HUMAN	diabetes insipidus, nephrogenic, x-linked	VAR_062591	p.Gly122Asp
										P30518	V2R_HUMAN	diabetes insipidus, nephrogenic, x-linked	VAR_015319	p.Met123Lys
										P30518	V2R_HUMAN	diabetes insipidus, nephrogenic, x-linked	VAR_015349	p.Cys319Arg
										P30518	V2R_HUMAN	diabetes insipidus, nephrogenic, x-linked	VAR_015350	p.Asn321Asp
										P30518	V2R_HUMAN	diabetes insipidus, nephrogenic, x-linked	VAR_015351	p.Asn321Lys
										P30518	V2R_HUMAN	diabetes insipidus, nephrogenic, x-linked	VAR_015352	p.Asn321Tyr
										P30518	V2R_HUMAN	diabetes insipidus, nephrogenic, x-linked	VAR_015353	p.Pro322His
										P30518	V2R_HUMAN	diabetes insipidus, nephrogenic, x-linked	VAR_015354	p.Pro322Ser
										P30518	V2R_HUMAN	diabetes insipidus, nephrogenic, x-linked	VAR_003548	p.Trp323Ser
										P30518	V2R_HUMAN	diabetes insipidus, nephrogenic, x-linked	VAR_015355	p.Trp323Arg
										P30566	PUR8_HUMAN	adenylosuccinase deficiency	VAR_016930	p.Ala2Val
										P30566	PUR8_HUMAN	adenylosuccinase deficiency	VAR_017078	p.Ala3Val
										P30566	PUR8_HUMAN	adenylosuccinase deficiency	VAR_017091	p.Asp430Asn
										P30566	PUR8_HUMAN	adenylosuccinase deficiency	VAR_000680	p.Ser438Pro
										P30613	KPYR_HUMAN	pyruvate kinase deficiency of red cells	VAR_004037	p.Phe287Val
										P30613	KPYR_HUMAN	pyruvate kinase deficiency of red cells	VAR_011449	p.Val288Leu
										P30613	KPYR_HUMAN	pyruvate kinase deficiency of red cells	VAR_011446	p.Asp293Asn
										P30613	KPYR_HUMAN	pyruvate kinase deficiency of red cells	VAR_011450	p.Ala295Val
										P30613	KPYR_HUMAN	pyruvate kinase hyperactivity	VAR_011435	p.Gly37Glu
										P30613	KPYR_HUMAN	pyruvate kinase deficiency of red cells	VAR_058467	p.Arg40Trp
										P30613	KPYR_HUMAN	pyruvate kinase deficiency of red cells	VAR_004074	p.Val552Met
										P30613	KPYR_HUMAN	pyruvate kinase deficiency of red cells	VAR_011481	p.Gly557Ala
										P30613	KPYR_HUMAN	pyruvate kinase deficiency of red cells	VAR_004075	p.Arg559Gly
										P30613	KPYR_HUMAN	pyruvate kinase deficiency of red cells	VAR_004076	p.Asn566Lys
										P30613	KPYR_HUMAN	pyruvate kinase deficiency of red cells	VAR_011482	p.Arg569Gln
										P30793	GCH1_HUMAN	dystonia 5	VAR_016889	p.Ala74Val
										P30793	GCH1_HUMAN	dystonia 5	VAR_002634	p.Leu79Pro
										P30793	GCH1_HUMAN	dystonia 5	VAR_016890	p.Gly83Ala
										P30793	GCH1_HUMAN	dystonia 5	VAR_002635	p.Arg88Pro
										P30793	GCH1_HUMAN	dystonia 5	VAR_002636	p.Arg88Trp
										P31150	GDIA_HUMAN	mental retardation, x-linked 41	VAR_008130	p.Leu92Pro
										P31327	CPSM_HUMAN	carbamoyl phosphate synthetase 1 deficiency	VAR_066125	p.Ala1065Glu
										P31327	CPSM_HUMAN	carbamoyl phosphate synthetase 1 deficiency	VAR_063572	p.Val1141Gly
										P31327	CPSM_HUMAN	carbamoyl phosphate synthetase 1 deficiency	VAR_066170	p.Thr1443Ala
										P31327	CPSM_HUMAN	carbamoyl phosphate synthetase 1 deficiency	VAR_064067	p.Arg1453Gln
										P31327	CPSM_HUMAN	carbamoyl phosphate synthetase 1 deficiency	VAR_064068	p.Arg1453Trp
										P31327	CPSM_HUMAN	carbamoyl phosphate synthetase 1 deficiency	VAR_066177	p.Asp165Gly
										P31327	CPSM_HUMAN	carbamoyl phosphate synthetase 1 deficiency	VAR_063562	p.Lys280Asn
										P31327	CPSM_HUMAN	carbamoyl phosphate synthetase 1 deficiency	VAR_066104	p.Gly301Glu
										P31327	CPSM_HUMAN	carbamoyl phosphate synthetase 1 deficiency	VAR_066187	p.Gly401Arg
										P31327	CPSM_HUMAN	carbamoyl phosphate synthetase 1 deficiency	VAR_066193	p.Val531Glu
										P31327	CPSM_HUMAN	carbamoyl phosphate synthetase 1 deficiency	VAR_066194	p.Val531Gly
										P31327	CPSM_HUMAN	carbamoyl phosphate synthetase 1 deficiency	VAR_006835	p.Thr544Met
										P31327	CPSM_HUMAN	carbamoyl phosphate synthetase 1 deficiency	VAR_063564	p.Arg587His
										P31327	CPSM_HUMAN	carbamoyl phosphate synthetase 1 deficiency	VAR_066195	p.Arg587Cys
										P31327	CPSM_HUMAN	carbamoyl phosphate synthetase 1 deficiency	VAR_066196	p.Arg587Leu
										P31327	CPSM_HUMAN	carbamoyl phosphate synthetase 1 deficiency	VAR_066142	p.Ala589Thr
										P31327	CPSM_HUMAN	carbamoyl phosphate synthetase 1 deficiency	VAR_063565	p.Gly593Arg
										P31327	CPSM_HUMAN	carbamoyl phosphate synthetase 1 deficiency	VAR_066197	p.Ser597Leu
										P31327	CPSM_HUMAN	carbamoyl phosphate synthetase 1 deficiency	VAR_066199	p.Gly628Asp
										P31327	CPSM_HUMAN	carbamoyl phosphate synthetase 1 deficiency	VAR_066200	p.Ile632Arg
										P31327	CPSM_HUMAN	carbamoyl phosphate synthetase 1 deficiency	VAR_066201	p.Arg638Pro
										P31327	CPSM_HUMAN	carbamoyl phosphate synthetase 1 deficiency	VAR_066143	p.Ala640Ser
										P31327	CPSM_HUMAN	carbamoyl phosphate synthetase 1 deficiency	VAR_066152	p.Gly911Glu
										P31327	CPSM_HUMAN	carbamoyl phosphate synthetase 1 deficiency	VAR_066153	p.Gly911Val
										P31327	CPSM_HUMAN	carbamoyl phosphate synthetase 1 deficiency	VAR_066154	p.Ser913Leu
										P31327	CPSM_HUMAN	carbamoyl phosphate synthetase 1 deficiency	VAR_066155	p.Asp914Gly
										P31327	CPSM_HUMAN	carbamoyl phosphate synthetase 1 deficiency	VAR_066156	p.Asp914His
										P31327	CPSM_HUMAN	carbamoyl phosphate synthetase 1 deficiency	VAR_030676	p.Ser918Pro
										P31785	IL2RG_HUMAN	severe combined immunodeficiency x-linked t-cell-negative/b-cell-positive/nk-cell-negative	VAR_002701	p.Arg285Gln
										P31785	IL2RG_HUMAN	x-linked combined immunodeficiency	VAR_002702	p.Leu293Gln
										P32004	L1CAM_HUMAN	hydrocephalus	VAR_003947	p.Ser1194Leu
										P32004	L1CAM_HUMAN	mental retardation, aphasia, shuffling gait, and adducted thumbs syndrome	VAR_003947	p.Ser1194Leu
										P32004	L1CAM_HUMAN	hydrocephalus	VAR_003948	p.Ser1224Leu
										P32245	MC4R_HUMAN	obesity	VAR_038653	p.Ile316Ser
										P32245	MC4R_HUMAN	obesity	VAR_010712	p.Ile317Thr
										P32249	GP183_HUMAN	acute myeloid leukemia	VAR_054147	p.Ala338Val
										P33897	ABCD1_HUMAN	adrenoleukodystrophy	VAR_000065	p.Arg418Trp
										P35222	CTNB1_HUMAN	hepatocellular carcinoma	VAR_017612	p.Ser23Arg
										P35222	CTNB1_HUMAN	hepatocellular carcinoma	VAR_017614	p.Asp32Ala
										P35222	CTNB1_HUMAN	pilomatrixoma	VAR_017615	p.Asp32Gly
										P35222	CTNB1_HUMAN	pilomatrixoma	VAR_017616	p.Asp32Tyr
										P35222	CTNB1_HUMAN	colorectal cancer	VAR_017619	p.Ser33Tyr
										P35222	CTNB1_HUMAN	hepatocellular carcinoma	VAR_017618	p.Ser33Leu
										P35222	CTNB1_HUMAN	medulloblastoma	VAR_017617	p.Ser33Phe
										P35222	CTNB1_HUMAN	pilomatrixoma	VAR_017617	p.Ser33Phe
										P35222	CTNB1_HUMAN	pilomatrixoma	VAR_017619	p.Ser33Tyr
										P35222	CTNB1_HUMAN	hepatoblastoma	VAR_017622	p.Gly34Val
										P35222	CTNB1_HUMAN	hepatocellular carcinoma	VAR_017621	p.Gly34Arg
										P35222	CTNB1_HUMAN	pilomatrixoma	VAR_017620	p.Gly34Glu
										P35222	CTNB1_HUMAN	hepatocellular carcinoma	VAR_017623	p.Ile35Ser
										P35222	CTNB1_HUMAN	hepatocellular carcinoma	VAR_017627	p.Ser37Tyr
										P35222	CTNB1_HUMAN	medulloblastoma	VAR_017624	p.Ser37Ala
										P35222	CTNB1_HUMAN	ovarian cancer	VAR_017625	p.Ser37Cys
										P35222	CTNB1_HUMAN	pilomatrixoma	VAR_017625	p.Ser37Cys
										P35222	CTNB1_HUMAN	pilomatrixoma	VAR_017626	p.Ser37Phe
										P35222	CTNB1_HUMAN	hepatoblastoma	VAR_017629	p.Thr41Ala
										P35222	CTNB1_HUMAN	hepatocellular carcinoma	VAR_017629	p.Thr41Ala
										P35222	CTNB1_HUMAN	ovarian cancer	VAR_017630	p.Thr41Ile
										P35222	CTNB1_HUMAN	pilomatrixoma	VAR_017630	p.Thr41Ile
										P35222	CTNB1_HUMAN	hepatocellular carcinoma	VAR_017631	p.Ser45Phe
										P35222	CTNB1_HUMAN	hepatocellular carcinoma	VAR_017632	p.Ser45Pro
										P35240	MERL_HUMAN	neurofibromatosis 2	VAR_009123	p.Leu234Arg
										P35241	RADI_HUMAN	deafness, autosomal recessive, 24	VAR_036859	p.Asp578Asn
										P35367	HRH1_HUMAN	colorectal cancer	VAR_035761	p.Asp385Glu
										P35520	CBS_HUMAN	cystathionine beta-synthase deficiency	VAR_008068	p.Thr191Met
										P35520	CBS_HUMAN	cystathionine beta-synthase deficiency	VAR_008069	p.Asp198Val
										P35520	CBS_HUMAN	cystathionine beta-synthase deficiency	VAR_066099	p.Pro200Leu
										P35548	MSX2_HUMAN	craniosynostosis 2	VAR_003755	p.Pro148His
										P35557	HXK4_HUMAN	maturity-onset diabetes of the young 2	VAR_003714	p.Lys414Glu
										P35568	IRS1_HUMAN	diabetes mellitus, non-insulin-dependent	VAR_005303	p.Cys1095Tyr
										P35575	G6PC_HUMAN	glycogen storage disease 1a	VAR_046261	p.Arg170Gln
										P35575	G6PC_HUMAN	glycogen storage disease 1a	VAR_046262	p.Phe177Cys
										P35575	G6PC_HUMAN	glycogen storage disease 1a	VAR_046263	p.Pro178Ser
										P35575	G6PC_HUMAN	glycogen storage disease 1a	VAR_065164	p.Pro178Ala
										P35575	G6PC_HUMAN	glycogen storage disease 1a	VAR_046264	p.His179Pro
										P35579	MYH9_HUMAN	epstein syndrome	VAR_030385	p.Ile1816Val
										P35625	TIMP3_HUMAN	sorsby fundus dystrophy	VAR_008290	p.Gly189Cys
										P35625	TIMP3_HUMAN	sorsby fundus dystrophy	VAR_010901	p.Gly190Cys
										P35625	TIMP3_HUMAN	sorsby fundus dystrophy	VAR_007509	p.Tyr191Cys
										P35637	FUS_HUMAN	amyotrophic lateral sclerosis 6	VAR_068919	p.Arg216Cys
										P35637	FUS_HUMAN	tremor, hereditary essential 4	VAR_068919	p.Arg216Cys
										P35637	FUS_HUMAN	amyotrophic lateral sclerosis 6	VAR_068920	p.Gly225Val
										P35637	FUS_HUMAN	frontotemporal lobar degeneration	VAR_065229	p.Met254Val
										P35637	FUS_HUMAN	breast cancer	VAR_035481	p.Lys312Gln
										P35658	NU214_HUMAN	breast cancer	VAR_035856	p.Gly424Ala
										P35658	NU214_HUMAN	breast cancer	VAR_035856	p.Gly424Ala
										P35670	ATP7B_HUMAN	wilson disease	VAR_044454	p.Ala486Ser
										P35680	HNF1B_HUMAN	renal cysts and diabetes syndrome	VAR_046014	p.Gly76Cys
										P35908	K22E_HUMAN	ichthyosis bullosa of siemens	VAR_009185	p.Asn186Tyr
										P35908	K22E_HUMAN	ichthyosis bullosa of siemens	VAR_010515	p.Asn186Asp
										P35908	K22E_HUMAN	ichthyosis bullosa of siemens	VAR_017829	p.Asn186Lys
										P35913	PDE6B_HUMAN	retinitis pigmentosa 40	VAR_009292	p.Arg552Gln
										P35913	PDE6B_HUMAN	retinitis pigmentosa 40	VAR_006050	p.His557Tyr
										P35914	HMGCL_HUMAN	3-hydroxy-3-methylglutaryl-coa lyase deficiency	VAR_058445	p.Phe192Ser
										P35914	HMGCL_HUMAN	3-hydroxy-3-methylglutaryl-coa lyase deficiency	VAR_058446	p.Ile200Phe
										P35914	HMGCL_HUMAN	3-hydroxy-3-methylglutaryl-coa lyase deficiency	VAR_058447	p.Ser201Tyr
										P35914	HMGCL_HUMAN	3-hydroxy-3-methylglutaryl-coa lyase deficiency	VAR_058448	p.Gly203Glu
										P35914	HMGCL_HUMAN	3-hydroxy-3-methylglutaryl-coa lyase deficiency	VAR_058449	p.Asp204Asn
										P35916	VGFR3_HUMAN	lymphedema, hereditary, 1a	VAR_018409	p.Gly857Arg
										P36543	VATE1_HUMAN	colorectal cancer	VAR_036565	p.Arg50Gly
										P36551	HEM6_HUMAN	hereditary coproporphyria	VAR_002163	p.Trp427Arg
										P36871	PGM1_HUMAN	glycogen storage disease 14	VAR_062280	p.Thr115Ala
										P36871	PGM1_HUMAN	congenital disorder of glycosylation 1t	VAR_069219	p.Gly121Arg
										P36888	FLT3_HUMAN	lymphoblastic leukemia	VAR_065679	p.Asp835Glu
										P36888	FLT3_HUMAN	lymphoblastic leukemia	VAR_065680	p.Asp835His
										P36888	FLT3_HUMAN	lymphoblastic leukemia	VAR_065681	p.Asp835Asn
										P36888	FLT3_HUMAN	lymphoblastic leukemia	VAR_065682	p.Asp835Val
										P36888	FLT3_HUMAN	lymphoblastic leukemia	VAR_065683	p.Asp835Tyr
										P36888	FLT3_HUMAN	lymphoblastic leukemia patients and in acute myelogenous leukemia	VAR_065679	p.Asp835Glu
										P36888	FLT3_HUMAN	lymphoblastic leukemia patients and in acute myelogenous leukemia	VAR_065680	p.Asp835His
										P36888	FLT3_HUMAN	lymphoblastic leukemia patients and in acute myelogenous leukemia	VAR_065681	p.Asp835Asn
										P36888	FLT3_HUMAN	lymphoblastic leukemia patients and in acute myelogenous leukemia	VAR_065682	p.Asp835Val
										P36888	FLT3_HUMAN	lymphoblastic leukemia patients and in acute myelogenous leukemia	VAR_065683	p.Asp835Tyr
										P36888	FLT3_HUMAN	myelogenous leukemia	VAR_065679	p.Asp835Glu
										P36888	FLT3_HUMAN	myelogenous leukemia	VAR_065680	p.Asp835His
										P36888	FLT3_HUMAN	myelogenous leukemia	VAR_065681	p.Asp835Asn
										P36888	FLT3_HUMAN	myelogenous leukemia	VAR_065682	p.Asp835Val
										P36888	FLT3_HUMAN	myelogenous leukemia	VAR_065683	p.Asp835Tyr
										P36888	FLT3_HUMAN	lymphoblastic leukemia	VAR_065684	p.Ile836Met
										P36897	TGFR1_HUMAN	loeys-dietz syndrome 1a	VAR_022344	p.Thr200Ile
										P37173	TGFR2_HUMAN	loeys-dietz syndrome 1b	VAR_022352	p.Tyr336Asn
										P37173	TGFR2_HUMAN	breast tumor	VAR_022356	p.Asn435Ser
										P37173	TGFR2_HUMAN	loeys-dietz syndrome 1b	VAR_066725	p.Asp446Asn
										P37173	TGFR2_HUMAN	breast tumor	VAR_022357	p.Val447Ala
										P37231	PPARG_HUMAN	obesity	VAR_010724	p.Pro113Gln
										P37275	ZEB1_HUMAN	corneal dystrophy, fuchs endothelial, 6	VAR_063760	p.Pro649Ala
										P37287	PIGA_HUMAN	paroxysmal nocturnal hemoglobinuria 1	VAR_015442	p.Arg19Trp
										P37840	SYUA_HUMAN	dementia lewy body	VAR_022703	p.Glu46Lys
										P37840	SYUA_HUMAN	parkinson disease 1	VAR_022703	p.Glu46Lys
										P38398	BRCA1_HUMAN	breast cancer	VAR_020689	p.Ser1139Ile
										P38398	BRCA1_HUMAN	breast cancer	VAR_007782	p.Pro1150Ser
										P38398	BRCA1_HUMAN	breast cancer	VAR_020690	p.Ser1187Ile
										P38398	BRCA1_HUMAN	breast-ovarian cancer, familial, 1	VAR_020690	p.Ser1187Ile
										P38398	BRCA1_HUMAN	breast cancer	VAR_020691	p.Gln1200His
										P38398	BRCA1_HUMAN	breast-ovarian cancer, familial, 1	VAR_020691	p.Gln1200His
										P38398	BRCA1_HUMAN	breast cancer	VAR_020692	p.Arg1204Ile
										P38398	BRCA1_HUMAN	breast cancer	VAR_020693	p.Lys1207Asn
										P38398	BRCA1_HUMAN	breast cancer	VAR_020694	p.Glu1210Gly
										P38398	BRCA1_HUMAN	breast cancer	VAR_070481	p.Glu1214Lys
										P38398	BRCA1_HUMAN	breast cancer	VAR_020695	p.Ser1217Tyr
										P38398	BRCA1_HUMAN	breast-ovarian cancer, familial, 1	VAR_020695	p.Ser1217Tyr
										P38398	BRCA1_HUMAN	breast cancer	VAR_052078	p.Asn1236Lys
										P38398	BRCA1_HUMAN	breast-ovarian cancer, familial, 1	VAR_020697	p.Arg1243Gly
										P38398	BRCA1_HUMAN	breast cancer	VAR_070483	p.Glu1282Val
										P38398	BRCA1_HUMAN	breast cancer	VAR_020698	p.Ser1297Pro
										P38398	BRCA1_HUMAN	breast cancer	VAR_070485	p.Ser1301Arg
										P38398	BRCA1_HUMAN	breast cancer	VAR_070486	p.Glu1346Lys
										P38398	BRCA1_HUMAN	breast cancer	VAR_070488	p.Met1400Val
										P38398	BRCA1_HUMAN	breast cancer	VAR_007787	p.Arg1443Gly
										P38398	BRCA1_HUMAN	breast cancer	VAR_070490	p.Ser1448Gly
										P38398	BRCA1_HUMAN	breast cancer	VAR_063900	p.Arg1495Met
										P38398	BRCA1_HUMAN	ovarian cancer	VAR_020702	p.Cys1697Arg
										P38398	BRCA1_HUMAN	breast cancer	VAR_020703	p.Arg1699Trp
										P38398	BRCA1_HUMAN	breast cancer	VAR_070501	p.Arg1699Gln
										P38398	BRCA1_HUMAN	ovarian cancer	VAR_020703	p.Arg1699Trp
										P38398	BRCA1_HUMAN	breast cancer	VAR_063905	p.Gly1706Glu
										P38398	BRCA1_HUMAN	breast cancer	VAR_070502	p.Gly1706Ala
										P38398	BRCA1_HUMAN	breast cancer	VAR_063906	p.Ser1715Arg
										P38398	BRCA1_HUMAN	breast cancer	VAR_070503	p.Trp1718Cys
										P38398	BRCA1_HUMAN	breast cancer	VAR_070504	p.Thr1720Ala
										P38398	BRCA1_HUMAN	breast cancer	VAR_007765	p.Phe461Leu
										P38398	BRCA1_HUMAN	breast cancer	VAR_070474	p.Asp695Asn
										P38398	BRCA1_HUMAN	breast cancer	VAR_020683	p.Asp749Tyr
										P38398	BRCA1_HUMAN	breast cancer	VAR_035948	p.Leu758Phe
										P38398	BRCA1_HUMAN	breast cancer	VAR_007776	p.Gly960Asp
										P39019	RS19_HUMAN	diamond-blackfan anemia 1	VAR_018440	p.Pro47Leu
										P39019	RS19_HUMAN	diamond-blackfan anemia 1	VAR_018441	p.Trp52Arg
										P39019	RS19_HUMAN	diamond-blackfan anemia 1	VAR_055439	p.Trp52Cys
										P39019	RS19_HUMAN	diamond-blackfan anemia 1	VAR_018442	p.Thr55Met
										P39019	RS19_HUMAN	diamond-blackfan anemia 1	VAR_018437	p.Arg56Gln
										P39019	RS19_HUMAN	diamond-blackfan anemia 1	VAR_055440	p.Ala57Pro
										P39019	RS19_HUMAN	diamond-blackfan anemia 1	VAR_046148	p.Ser59Phe
										P39019	RS19_HUMAN	diamond-blackfan anemia 1	VAR_018443	p.Ala61Glu
										P39019	RS19_HUMAN	diamond-blackfan anemia 1	VAR_006924	p.Arg62Trp
										P39019	RS19_HUMAN	diamond-blackfan anemia 1	VAR_018444	p.Arg62Gln
										P39019	RS19_HUMAN	diamond-blackfan anemia 1	VAR_055441	p.Leu64Pro
										P40337	VHL_HUMAN	cerebellar hemangioblastoma	VAR_005710	p.Gly104Ala
										P40337	VHL_HUMAN	von hippel-lindau disease	VAR_005711	p.Thr105Pro
										P40337	VHL_HUMAN	lung cancer	VAR_005712	p.Gly106Asp
										P40337	VHL_HUMAN	pheochromocytoma	VAR_034991	p.Arg107Gly
										P40337	VHL_HUMAN	von hippel-lindau disease	VAR_005713	p.Arg107Pro
										P40337	VHL_HUMAN	von hippel-lindau disease	VAR_005714	p.Ser111Cys
										P40337	VHL_HUMAN	von hippel-lindau disease	VAR_005715	p.Ser111Asn
										P40337	VHL_HUMAN	von hippel-lindau disease	VAR_005716	p.Ser111Arg
										P40337	VHL_HUMAN	von hippel-lindau disease	VAR_005717	p.Tyr112His
										P40337	VHL_HUMAN	von hippel-lindau disease	VAR_034992	p.Tyr112Asn
										P40337	VHL_HUMAN	von hippel-lindau disease	VAR_005718	p.Gly114Cys
										P40337	VHL_HUMAN	von hippel-lindau disease	VAR_005719	p.Gly114Arg
										P40337	VHL_HUMAN	von hippel-lindau disease	VAR_005720	p.Gly114Ser
										P40337	VHL_HUMAN	von hippel-lindau disease	VAR_005722	p.His115Tyr
										P40337	VHL_HUMAN	von hippel-lindau disease	VAR_005723	p.His115Gln
										P40337	VHL_HUMAN	von hippel-lindau disease	VAR_008098	p.His115Arg
										P40337	VHL_HUMAN	von hippel-lindau disease	VAR_005724	p.Leu116Val
										P40337	VHL_HUMAN	von hippel-lindau disease	VAR_005725	p.Trp117Cys
										P40337	VHL_HUMAN	von hippel-lindau disease	VAR_005726	p.Leu118Pro
										P40337	VHL_HUMAN	von hippel-lindau disease	VAR_005727	p.Leu118Arg
										P40337	VHL_HUMAN	von hippel-lindau disease	VAR_005768	p.Leu178Pro
										P40337	VHL_HUMAN	von hippel-lindau disease	VAR_005769	p.Leu178Gln
										P40337	VHL_HUMAN	von hippel-lindau disease	VAR_005770	p.Ile180Val
										P40337	VHL_HUMAN	von hippel-lindau disease	VAR_005771	p.Leu184Arg
										P40337	VHL_HUMAN	von hippel-lindau disease	VAR_005772	p.Leu184Pro
										P40337	VHL_HUMAN	von hippel-lindau disease	VAR_005773	p.Glu186Lys
										P40337	VHL_HUMAN	erythrocytosis, familial, 2	VAR_005777	p.Leu188Val
										P40337	VHL_HUMAN	pheochromocytoma	VAR_005777	p.Leu188Val
										P40337	VHL_HUMAN	von hippel-lindau disease	VAR_005775	p.Leu188Pro
										P40337	VHL_HUMAN	von hippel-lindau disease	VAR_005776	p.Leu188Gln
										P40337	VHL_HUMAN	von hippel-lindau disease	VAR_005777	p.Leu188Val
										P40337	VHL_HUMAN	erythrocytosis, familial, 2	VAR_034999	p.His191Asp
										P40337	VHL_HUMAN	erythrocytosis, familial, 2	VAR_035000	p.Pro192Ser
										P40337	VHL_HUMAN	von hippel-lindau disease	VAR_005670	p.Ser38Pro
										P40337	VHL_HUMAN	pheochromocytoma	VAR_034987	p.Leu63Pro
										P40337	VHL_HUMAN	pheochromocytoma	VAR_034988	p.Arg64Pro
										P40337	VHL_HUMAN	pheochromocytoma	VAR_034989	p.Ser65Ala
										P40337	VHL_HUMAN	von hippel-lindau disease	VAR_005672	p.Ser65Leu
										P40337	VHL_HUMAN	von hippel-lindau disease	VAR_005673	p.Ser65Trp
										P40337	VHL_HUMAN	pheochromocytoma	VAR_005675	p.Ser68Trp
										P40337	VHL_HUMAN	von hippel-lindau disease	VAR_005675	p.Ser68Trp
										P40337	VHL_HUMAN	von hippel-lindau disease	VAR_005676	p.Glu70Lys
										P40337	VHL_HUMAN	von hippel-lindau disease	VAR_005677	p.Val74Gly
										P40337	VHL_HUMAN	von hippel-lindau disease	VAR_005679	p.Phe76Ile
										P40337	VHL_HUMAN	von hippel-lindau disease	VAR_005680	p.Phe76Leu
										P40337	VHL_HUMAN	von hippel-lindau disease	VAR_005681	p.Phe76Ser
										P40337	VHL_HUMAN	von hippel-lindau disease	VAR_005682	p.Asn78His
										P40337	VHL_HUMAN	von hippel-lindau disease	VAR_005683	p.Asn78Ser
										P40337	VHL_HUMAN	von hippel-lindau disease	VAR_005684	p.Asn78Thr
										P40337	VHL_HUMAN	von hippel-lindau disease	VAR_005685	p.Arg79Pro
										P40692	MLH1_HUMAN	hereditary non-polyposis colorectal cancer 2	VAR_012909	p.Arg182Gly
										P40692	MLH1_HUMAN	hereditary non-polyposis colorectal cancer 2	VAR_022666	p.Arg182Lys
										P40692	MLH1_HUMAN	hereditary non-polyposis colorectal cancer 2	VAR_004447	p.Val185Gly
										P40692	MLH1_HUMAN	hereditary non-polyposis colorectal cancer 2	VAR_043398	p.Val185Leu
										P40692	MLH1_HUMAN	hereditary non-polyposis colorectal cancer 2	VAR_043402	p.His264Tyr
										P40692	MLH1_HUMAN	hereditary non-polyposis colorectal cancer 2	VAR_043403	p.Ala282Gly
										P40692	MLH1_HUMAN	hereditary non-polyposis colorectal cancer 2	VAR_043404	p.Leu292Pro
										P40692	MLH1_HUMAN	hereditary non-polyposis colorectal cancer 2	VAR_012916	p.Ser295Thr
										P40692	MLH1_HUMAN	hereditary non-polyposis colorectal cancer 2	VAR_043414	p.Arg474Gln
										P40763	STAT3_HUMAN	hyperimmunoglobulin e recurrent infection syndrome, autosomal dominant	VAR_037371	p.Arg423Gln
										P40763	STAT3_HUMAN	hyperimmunoglobulin e recurrent infection syndrome, autosomal dominant	VAR_037372	p.His437Tyr
										P40763	STAT3_HUMAN	hyperimmunoglobulin e recurrent infection syndrome, autosomal dominant	VAR_037381	p.Tyr657Cys
										P40879	S26A3_HUMAN	diarrhea 1, secretory chloride, congenital	VAR_066071	p.Leu496Arg
										P40879	S26A3_HUMAN	diarrhea 1, secretory chloride, congenital	VAR_066072	p.Tyr520Cys
										P40879	S26A3_HUMAN	diarrhea 1, secretory chloride, congenital	VAR_066073	p.Lys521Asn
										P41180	CASR_HUMAN	hypocalciuric hypercalcemia, familial 1	VAR_058084	p.Arg886Trp
										P41180	CASR_HUMAN	epilepsy, idiopathic generalized 8	VAR_060208	p.Arg898Gln
										P41181	AQP2_HUMAN	diabetes insipidus, nephrogenic, autosomal	VAR_062589	p.Arg254Leu
										P41181	AQP2_HUMAN	diabetes insipidus, nephrogenic, autosomal	VAR_062590	p.Arg254Gln
										P41181	AQP2_HUMAN	diabetes insipidus, nephrogenic, autosomal	VAR_015254	p.Glu258Lys
										P41181	AQP2_HUMAN	diabetes insipidus, nephrogenic, autosomal	VAR_015255	p.Pro262Leu
										P41235	HNF4A_HUMAN	maturity-onset diabetes of the young 1	VAR_004668	p.Arg136Trp
										P41235	HNF4A_HUMAN	maturity-onset diabetes of the young 1	VAR_010601	p.Glu285Gln
										P42224	STAT1_HUMAN	stat1 deficiency complete	VAR_065815	p.Lys201Asn
										P42224	STAT1_HUMAN	candidiasis, familial, 7	VAR_065938	p.Met202Ile
										P42224	STAT1_HUMAN	candidiasis, familial, 7	VAR_065939	p.Met202Val
										P42224	STAT1_HUMAN	mycobacterial disease	VAR_018266	p.Leu706Ser
										P42263	GRIA3_HUMAN	mental retardation, x-linked 94	VAR_043484	p.Arg450Gln
										P42345	MTOR_HUMAN	glioblastoma multiforme	VAR_041544	p.Pro2476Leu
										P42679	MATK_HUMAN	colorectal adenocarcinoma	VAR_041681	p.Arg503Gln
										P42768	WASP_HUMAN	wiskott-aldrich syndrome	VAR_005838	p.Lys476Glu
										P42768	WASP_HUMAN	thrombocytopenia 1	VAR_005839	p.Arg477Lys
										P42768	WASP_HUMAN	thrombocytopenia 1	VAR_033257	p.Ile481Asn
										P42771	CD2A1_HUMAN	non-small cell lung carcinoma	VAR_001482	p.Ala134Val
										P42771	CD2A1_HUMAN	biliary tract tumor	VAR_001408	p.Asp14Glu
										P42771	CD2A1_HUMAN	non-small cell lung carcinoma	VAR_001483	p.His142Tyr
										P42771	CD2A1_HUMAN	squamous cell carcinoma	VAR_001484	p.Arg144Cys
										P42892	ECE1_HUMAN	hirschsprung disease cardiac defects and autonomic dysfunction	VAR_026747	p.Arg754Cys
										P43034	LIS1_HUMAN	lissencephaly 1	VAR_015398	p.Phe31Ser
										P43246	MSH2_HUMAN	glioma	VAR_012937	p.Cys199Arg
										P43246	MSH2_HUMAN	hereditary non-polyposis colorectal cancer 1	VAR_043738	p.Thr33Pro
										P43246	MSH2_HUMAN	hereditary non-polyposis colorectal cancer 1	VAR_043782	p.Met729Val
										P43246	MSH2_HUMAN	hereditary non-polyposis colorectal cancer 1	VAR_043783	p.Thr732Ile
										P43246	MSH2_HUMAN	hereditary non-polyposis colorectal cancer 1	VAR_043789	p.Glu853Ala
										P43246	MSH2_HUMAN	hereditary non-polyposis colorectal cancer 1	VAR_004489	p.Thr905Arg
										P43355	MAGA1_HUMAN	breast cancer	VAR_036581	p.Lys278Thr
										P43403	ZAP70_HUMAN	selective t-cell defect	VAR_006351	p.Ser518Arg
										P43487	RANG_HUMAN	breast cancer	VAR_036567	p.Glu16Asp
										P43694	GATA4_HUMAN	atrial septal defect 2	VAR_067618	p.Leu403Met
										P43694	GATA4_HUMAN	tetralogy of fallot	VAR_067619	p.Pro407Gln
										P43694	GATA4_HUMAN	ventricular septal defect 1	VAR_067619	p.Pro407Gln
										P43694	GATA4_HUMAN	ventricular septal defect 1	VAR_067620	p.Ala411Val
										P45379	TNNT2_HUMAN	cardiomyopathy, dilated 1d	VAR_043984	p.Arg215Leu
										P45983	MK08_HUMAN	renal clear cell carcinoma	VAR_042258	p.Gly171Ser
										P45983	MK08_HUMAN	glioblastoma multiforme	VAR_042259	p.Gly177Arg
										P45985	MP2K4_HUMAN	metastatic melanoma	VAR_040821	p.Ser251Asn
										P46527	CDN1B_HUMAN	multiple endocrine tumors	VAR_064429	p.Pro69Leu
										P46734	MP2K3_HUMAN	colon cancer	VAR_014209	p.Leu215Val
[truncated: 758 more rows]
[truncated: 8 more columns]

## Sheet: Ubiquitylation
Ubiquitylation[Exact Match]								Ubiquitylation[±2]
	O14896	IRF6_HUMAN	popliteal pterygium syndrome	D011625	VAR_014967				O00165	HAX1_HUMAN	neutropenia, severe congenital 3, autosomal recessive	VAR_064514	p.Leu130Arg
	O60832	DKC1_HUMAN	dyskeratosis congenita, x-linked	D019871	VAR_010077				O14896	IRF6_HUMAN	van der woude syndrome 1	VAR_030050	p.Thr64Ile
	O95999	BCL10_HUMAN	malt lymphoma	D018442	VAR_013210				O14896	IRF6_HUMAN	popliteal pterygium syndrome	VAR_014967	p.Lys66Thr
	P01116	RASK_HUMAN	cardiofaciocutaneous syndrome 2		VAR_069785				O15305	PMM2_HUMAN	congenital disorder of glycosylation 1a	VAR_022479	p.Tyr76Cys
	P02545	LMNA_HUMAN	lipodystrophy, familial partial, 2	D052496	VAR_009994				O15360	FANCA_HUMAN	fanconi anemia	VAR_038021	p.Arg1400His
	P02545	LMNA_HUMAN	cardiomyopathy, dilated 1a	D002311	VAR_039759				O60832	DKC1_HUMAN	hoyeraal-hreidarsson syndrome	VAR_015674	p.Ile38Thr
	P04637	P53_HUMAN	sporadic cancer	D009369	VAR_044656				O60832	DKC1_HUMAN	dyskeratosis congenita, x-linked	VAR_010077	p.Lys39Glu
	P04637	P53_HUMAN	sporadic cancers	D009369	VAR_044657				O60832	DKC1_HUMAN	dyskeratosis congenita, x-linked	VAR_006813	p.Pro40Arg
	P04637	P53_HUMAN	sporadic cancer	D009369	VAR_044701				O60832	DKC1_HUMAN	dyskeratosis congenita, x-linked	VAR_010078	p.Glu41Lys
	P04637	P53_HUMAN	sporadic cancers	D009369	VAR_044699				O60832	DKC1_HUMAN	dyskeratosis congenita, x-linked	VAR_063821	p.Leu56Ser
	P04637	P53_HUMAN	sporadic cancers	D009369	VAR_044700				O75081	MTG16_HUMAN	colorectal cancer	VAR_035449	p.Ala534Val
	P04637	P53_HUMAN	sporadic cancers	D009369	VAR_044702				O75881	CP7B1_HUMAN	spastic paraplegia 5a, autosomal recessive	VAR_044383	p.Phe216Ser
	P04637	P53_HUMAN	li-fraumeni syndrome	D016864	VAR_044740				O95999	BCL10_HUMAN	malt lymphoma	VAR_013210	p.Lys31Glu
	P04637	P53_HUMAN	sporadic cancer	D009369	VAR_045790				O95999	BCL10_HUMAN	malt lymphoma	VAR_013216	p.Arg64Lys
	P04637	P53_HUMAN	sporadic cancer	D009369	VAR_045791				P00367	DHE3_HUMAN	familial hyperinsulinemic hypoglycemia 6	VAR_008669	p.Ser501Pro
	P04637	P53_HUMAN	sporadic cancers	D009369	VAR_005873				P00374	DYR_HUMAN	megaloblastic anemia	VAR_065818	p.Leu80Phe
	P04637	P53_HUMAN	sporadic cancers	D009369	VAR_005874				P00387	NB5R3_HUMAN	methemoglobinemia cyb5r3-related	VAR_004621	p.Ser128Pro
	P04637	P53_HUMAN	sporadic cancers	D009369	VAR_044741				P00441	SODC_HUMAN	amyotrophic lateral sclerosis 1	VAR_008722	p.Asp125Val
	P04637	P53_HUMAN	sporadic cancers	D009369	VAR_044742				P00441	SODC_HUMAN	amyotrophic lateral sclerosis 1	VAR_045884	p.Asp125Gly
	P04637	P53_HUMAN	sporadic cancers	D009369	VAR_044743				P00441	SODC_HUMAN	amyotrophic lateral sclerosis 1	VAR_007132	p.Val8Glu
	P04637	P53_HUMAN	sporadic cancers	D009369	VAR_005882				P00441	SODC_HUMAN	amyotrophic lateral sclerosis 1	VAR_013519	p.Leu9Gln
	P04637	P53_HUMAN	sporadic cancers	D009369	VAR_044766				P00441	SODC_HUMAN	amyotrophic lateral sclerosis 1	VAR_013520	p.Leu9Val
	P04637	P53_HUMAN	sporadic cancers	D009369	VAR_044767				P00492	HPRT_HUMAN	lesch-nyhan syndrome	VAR_006790	p.Pro176Leu
	P04637	P53_HUMAN	sporadic cancers	D009369	VAR_044768				P00492	HPRT_HUMAN	lesch-nyhan syndrome	VAR_006791	p.Asp177Val
	P04637	P53_HUMAN	sporadic cancers	D009369	VAR_044769				P00492	HPRT_HUMAN	lesch-nyhan syndrome	VAR_006792	p.Asp177Tyr
	P04637	P53_HUMAN	sporadic cancers	D009369	VAR_005913				P00533	EGFR_HUMAN	lung cancer	VAR_026084	p.Glu709Ala
	P04637	P53_HUMAN	sporadic cancers	D009369	VAR_005914				P00533	EGFR_HUMAN	lung cancer	VAR_026085	p.Glu709Lys
	P04637	P53_HUMAN	sporadic cancers	D009369	VAR_044873				P00533	EGFR_HUMAN	lung cancer	VAR_069498	p.Glu709Gly
	P04637	P53_HUMAN	sporadic cancers	D009369	VAR_044874				P00533	EGFR_HUMAN	lung cancer	VAR_019298	p.Leu858Arg
	P04637	P53_HUMAN	sporadic cancers	D009369	VAR_044875				P00533	EGFR_HUMAN	lung cancer	VAR_026101	p.Leu858Met
	P04637	P53_HUMAN	sporadic cancers	D009369	VAR_044876				P00533	EGFR_HUMAN	lung cancer	VAR_026102	p.Leu861Gln
	P04637	P53_HUMAN	sporadic cancers	D009369	VAR_045413				P00558	PGK1_HUMAN	phosphoglycerate kinase 1 deficiency	VAR_006082	p.Val266Met
	P04637	P53_HUMAN	sporadic cancers	D009369	VAR_045414				P00558	PGK1_HUMAN	phosphoglycerate kinase 1 deficiency	VAR_006076	p.Leu88Pro
	P04637	P53_HUMAN	sporadic cancers	D009369	VAR_045415				P01116	RASK_HUMAN	colorectal cancer	VAR_036308	p.Ala146Thr
	P04637	P53_HUMAN	sporadic cancers	D009369	VAR_045416				P01116	RASK_HUMAN	cardiofaciocutaneous syndrome 2	VAR_069785	p.Lys147Glu
	P04637	P53_HUMAN	sporadic cancers	D009369	VAR_045417				P02533	K1C14_HUMAN	epidermolysis bullosa simplex, dowling-meara type	VAR_023722	p.Leu130Pro
	P04637	P53_HUMAN	sporadic cancers	D009369	VAR_047205				P02533	K1C14_HUMAN	epidermolysis bullosa simplex, koebner type	VAR_023723	p.Val133Leu
	P04637	P53_HUMAN	li-fraumeni syndrome	D016864	VAR_015819				P02533	K1C14_HUMAN	epidermolysis bullosa simplex, weber-cockayne type	VAR_023723	p.Val133Leu
	P04637	P53_HUMAN	sporadic cancer	D009369	VAR_045420				P02533	K1C14_HUMAN	epidermolysis bullosa simplex, koebner type	VAR_031635	p.Arg134Pro
	P04637	P53_HUMAN	sporadic cancer	D009369	VAR_045872				P02538	K2C6A_HUMAN	pachyonychia congenita 1	VAR_017075	p.Phe174Val
	P04637	P53_HUMAN	sporadic cancers	D009369	VAR_045418				P02545	LMNA_HUMAN	emery-dreifuss muscular dystrophy 2, autosomal dominant	VAR_017657	p.Arg133Pro
	P04637	P53_HUMAN	sporadic cancers	D009369	VAR_045419				P02545	LMNA_HUMAN	lipodystrophy, familial partial, 2	VAR_016913	p.Arg133Leu
	P04637	P53_HUMAN	sporadic cancers	D009369	VAR_045421				P02545	LMNA_HUMAN	cardiomyopathy, dilated 1a	VAR_039761	p.Ser143Pro
	P04637	P53_HUMAN	sporadic cancers	D009369	VAR_045422				P02545	LMNA_HUMAN	hutchinson-gilford progeria syndrome	VAR_034707	p.Ser143Phe
	P04637	P53_HUMAN	sporadic cancer	D009369	VAR_045470				P02545	LMNA_HUMAN	hutchinson-gilford progeria syndrome	VAR_017659	p.Glu145Lys
	P04637	P53_HUMAN	sporadic cancer	D009369	VAR_045474				P02545	LMNA_HUMAN	cardiomyopathy, dilated 1a	VAR_009978	p.Glu203Gly
	P04637	P53_HUMAN	sporadic cancers	D009369	VAR_045472				P02545	LMNA_HUMAN	cardiomyopathy, dilated 1a	VAR_039767	p.Glu203Lys
	P04637	P53_HUMAN	sporadic cancers	D009369	VAR_045473				P02545	LMNA_HUMAN	emery-dreifuss muscular dystrophy 2, autosomal dominant	VAR_064964	p.Phe206Leu
	P04637	P53_HUMAN	sporadic cancer	D009369	VAR_045505				P02545	LMNA_HUMAN	cardiomyopathy, dilated 1a	VAR_070177	p.Ile210Ser
	P04637	P53_HUMAN	sporadic cancer	D009369	VAR_045506				P02545	LMNA_HUMAN	emery-dreifuss muscular dystrophy 2, autosomal dominant	VAR_039771	p.Gly232Glu
	P04637	P53_HUMAN	sporadic cancers	D009369	VAR_045504				P02545	LMNA_HUMAN	emery-dreifuss muscular dystrophy 2, autosomal dominant	VAR_039774	p.Tyr267Cys
	P04637	P53_HUMAN	sporadic cancers	D009369	VAR_045507				P02545	LMNA_HUMAN	emery-dreifuss muscular dystrophy 2, autosomal dominant	VAR_064965	p.Ser268Pro
	P04637	P53_HUMAN	kidney cancer	D007680	VAR_045508				P02545	LMNA_HUMAN	emery-dreifuss muscular dystrophy 2, autosomal dominant	VAR_064966	p.Leu271Pro
	P04637	P53_HUMAN	sporadic cancer	D009369	VAR_045509				P02545	LMNA_HUMAN	emery-dreifuss muscular dystrophy 2, autosomal dominant	VAR_039751	p.Glu33Gly
	P04637	P53_HUMAN	sporadic cancer	D009369	VAR_045569				P02545	LMNA_HUMAN	emery-dreifuss muscular dystrophy 2, autosomal dominant	VAR_039777	p.Arg377Leu
	P11387	TOP1_HUMAN	breast cancer	D001943	VAR_036555				P02545	LMNA_HUMAN	limb-girdle muscular dystrophy 1b	VAR_016205	p.Arg377His
	P11387	TOP1_HUMAN	breast cancer	D001943	VAR_036555				P02545	LMNA_HUMAN	limb-girdle muscular dystrophy 1b	VAR_039777	p.Arg377Leu
	P13647	K2C5_HUMAN	epidermolysis bullosa simplex, koebner type	D016110	VAR_010455				P02545	LMNA_HUMAN	muscular dystrophy congenital lmna-related	VAR_063591	p.Leu380Ser
	P30613	KPYR_HUMAN	pyruvate kinase deficiency of red cells		VAR_011456				P02545	LMNA_HUMAN	emery-dreifuss muscular dystrophy 2, autosomal dominant	VAR_064971	p.Gly449Asp
	P35579	MYH9_HUMAN	may-hegglin anomaly		VAR_018310				P02545	LMNA_HUMAN	muscular dystrophy congenital lmna-related	VAR_063593	p.Arg455Pro
	P35579	MYH9_HUMAN	sebastian syndrome		VAR_018310				P02545	LMNA_HUMAN	emery-dreifuss muscular dystrophy 2, autosomal dominant	VAR_039781	p.Asn456Ile
	P35579	MYH9_HUMAN	breast cancer	D001943	VAR_036006				P02545	LMNA_HUMAN	emery-dreifuss muscular dystrophy 2, autosomal dominant	VAR_039782	p.Asn456Lys
	P36551	HEM6_HUMAN	hereditary coproporphyria	D046349	VAR_002162				P02545	LMNA_HUMAN	muscular dystrophy congenital lmna-related	VAR_063594	p.Asn456Asp
	P51648	AL3A2_HUMAN	sjoegren-larsson syndrome	D016111	VAR_017519				P02545	LMNA_HUMAN	emery-dreifuss muscular dystrophy 2, autosomal dominant	VAR_009990	p.Ile469Thr
	P60484	PTEN_HUMAN	cowden syndrome 1	D006223	VAR_008741				P02545	LMNA_HUMAN	cardiomyopathy, dilated 1a	VAR_070182	p.Arg471His
	P63092	GNAS2_HUMAN	pseudohypoparathyroidism 1a	D011547	VAR_031881				P02545	LMNA_HUMAN	hutchinson-gilford progeria syndrome	VAR_017662	p.Arg471Cys
	P78527	PRKDC_HUMAN	lung adenocarcinoma	D000230	VAR_041602				P02545	LMNA_HUMAN	lipodystrophy, familial partial, 2	VAR_009994	p.Lys486Asn
	Q02878	RL6_HUMAN	colorectal cancer	D015179	VAR_036437				P02545	LMNA_HUMAN	cardiomyopathy, dilated 1a	VAR_039758	p.Arg89Leu
	Q14204	DYHC1_HUMAN	spinal muscular atrophy, lower extremity-predominant 1, autosomal dominant	D014897	VAR_067821				P02545	LMNA_HUMAN	cardiomyopathy, dilated 1a	VAR_067257	p.Leu92Phe
	Q8TDP1	RNH2C_HUMAN	aicardi-goutieres syndrome 3		VAR_027288				P02545	LMNA_HUMAN	cardiomyopathy, dilated 1a	VAR_039759	p.Lys97Glu
									P02792	FRIL_HUMAN	neurodegeneration with brain iron accumulation 3	VAR_026633	p.Ala96Thr
									P04075	ALDOA_HUMAN	glycogen storage disease 12	VAR_044142	p.Glu207Lys
									P04181	OAT_HUMAN	hyperornithinemia with gyrate atrophy of choroid and retina	VAR_000582	p.Gly375Ala
									P04181	OAT_HUMAN	hyperornithinemia with gyrate atrophy of choroid and retina	VAR_000583	p.Cys394Arg
									P04424	ARLY_HUMAN	argininosuccinic aciduria	VAR_000679	p.Gln286Arg
									P04424	ARLY_HUMAN	argininosuccinic aciduria	VAR_000676	p.Arg95Cys
									P04626	ERBB2_HUMAN	lung adenocarcinoma	VAR_055432	p.Leu755Pro
									P04637	P53_HUMAN	sporadic cancer	VAR_044655	p.Gln100Arg
									P04637	P53_HUMAN	sporadic cancer	VAR_044656	p.Lys101Asn
									P04637	P53_HUMAN	sporadic cancers	VAR_044657	p.Lys101Arg
									P04637	P53_HUMAN	sporadic cancers	VAR_044658	p.Thr102Ile
									P04637	P53_HUMAN	sporadic cancer	VAR_044694	p.Thr118Ala
									P04637	P53_HUMAN	sporadic cancer	VAR_044696	p.Thr118Arg
									P04637	P53_HUMAN	sporadic cancers	VAR_044695	p.Thr118Ile
									P04637	P53_HUMAN	sporadic cancer	VAR_044697	p.Ala119Asp
									P04637	P53_HUMAN	sporadic cancer	VAR_044698	p.Ala119Thr
									P04637	P53_HUMAN	sporadic cancer	VAR_044701	p.Lys120Gln
									P04637	P53_HUMAN	sporadic cancers	VAR_044699	p.Lys120Glu
									P04637	P53_HUMAN	sporadic cancers	VAR_044700	p.Lys120Met
									P04637	P53_HUMAN	sporadic cancers	VAR_044702	p.Lys120Arg
									P04637	P53_HUMAN	sporadic cancers	VAR_044703	p.Ser121Phe
									P04637	P53_HUMAN	sporadic cancer	VAR_044704	p.Val122Leu
									P04637	P53_HUMAN	sporadic cancer	VAR_044732	p.Leu130Ile
									P04637	P53_HUMAN	sporadic cancers	VAR_005870	p.Leu130Arg
									P04637	P53_HUMAN	sporadic cancers	VAR_044730	p.Leu130Phe
									P04637	P53_HUMAN	sporadic cancers	VAR_044731	p.Leu130His
									P04637	P53_HUMAN	sporadic cancers	VAR_044733	p.Leu130Pro
									P04637	P53_HUMAN	sporadic cancers	VAR_044734	p.Leu130Val
									P04637	P53_HUMAN	sporadic cancer	VAR_044735	p.Asn131Asp
									P04637	P53_HUMAN	sporadic cancer	VAR_044738	p.Asn131Thr
									P04637	P53_HUMAN	sporadic cancers	VAR_005871	p.Asn131Ser
									P04637	P53_HUMAN	sporadic cancers	VAR_005872	p.Asn131Lys
									P04637	P53_HUMAN	sporadic cancers	VAR_044736	p.Asn131His
									P04637	P53_HUMAN	sporadic cancers	VAR_044737	p.Asn131Ile
									P04637	P53_HUMAN	sporadic cancers	VAR_044739	p.Asn131Tyr
									P04637	P53_HUMAN	li-fraumeni syndrome	VAR_044740	p.Lys132Glu
									P04637	P53_HUMAN	sporadic cancer	VAR_045790	p.Lys132Leu
									P04637	P53_HUMAN	sporadic cancer	VAR_045791	p.Lys132Trp
									P04637	P53_HUMAN	sporadic cancers	VAR_005873	p.Lys132Met
									P04637	P53_HUMAN	sporadic cancers	VAR_005874	p.Lys132Gln
									P04637	P53_HUMAN	sporadic cancers	VAR_044741	p.Lys132Asn
									P04637	P53_HUMAN	sporadic cancers	VAR_044742	p.Lys132Arg
									P04637	P53_HUMAN	sporadic cancers	VAR_044743	p.Lys132Thr
									P04637	P53_HUMAN	li-fraumeni syndrome	VAR_005875	p.Met133Thr
									P04637	P53_HUMAN	li-fraumeni syndrome	VAR_044747	p.Met133Arg
									P04637	P53_HUMAN	sporadic cancers	VAR_044744	p.Met133Ile
									P04637	P53_HUMAN	sporadic cancers	VAR_044745	p.Met133Lys
									P04637	P53_HUMAN	sporadic cancers	VAR_044746	p.Met133Leu
									P04637	P53_HUMAN	sporadic cancers	VAR_044748	p.Met133Val
									P04637	P53_HUMAN	sporadic cancers	VAR_036504	p.Phe134Leu
									P04637	P53_HUMAN	sporadic cancers	VAR_044749	p.Phe134Cys
									P04637	P53_HUMAN	sporadic cancers	VAR_044750	p.Phe134Ile
									P04637	P53_HUMAN	sporadic cancers	VAR_044751	p.Phe134Ser
									P04637	P53_HUMAN	sporadic cancers	VAR_044752	p.Phe134Val
									P04637	P53_HUMAN	sporadic cancers	VAR_005880	p.Leu137Gln
									P04637	P53_HUMAN	sporadic cancers	VAR_044760	p.Leu137Met
									P04637	P53_HUMAN	sporadic cancers	VAR_044761	p.Leu137Pro
									P04637	P53_HUMAN	sporadic cancers	VAR_044762	p.Leu137Val
									P04637	P53_HUMAN	li-fraumeni syndrome	VAR_005881	p.Ala138Pro
									P04637	P53_HUMAN	li-fraumeni syndrome	VAR_044764	p.Ala138Ser
									P04637	P53_HUMAN	sporadic cancers	VAR_033034	p.Ala138Val
									P04637	P53_HUMAN	sporadic cancers	VAR_044763	p.Ala138Asp
									P04637	P53_HUMAN	sporadic cancers	VAR_044765	p.Ala138Thr
									P04637	P53_HUMAN	sporadic cancers	VAR_005882	p.Lys139Asn
									P04637	P53_HUMAN	sporadic cancers	VAR_044766	p.Lys139Glu
									P04637	P53_HUMAN	sporadic cancers	VAR_044767	p.Lys139Gln
									P04637	P53_HUMAN	sporadic cancers	VAR_044768	p.Lys139Arg
									P04637	P53_HUMAN	sporadic cancers	VAR_044769	p.Lys139Thr
									P04637	P53_HUMAN	sporadic cancer	VAR_044772	p.Thr140Asn
									P04637	P53_HUMAN	sporadic cancer	VAR_044773	p.Thr140Pro
									P04637	P53_HUMAN	sporadic cancers	VAR_044770	p.Thr140Ala
									P04637	P53_HUMAN	sporadic cancers	VAR_044771	p.Thr140Ile
									P04637	P53_HUMAN	sporadic cancers	VAR_044774	p.Thr140Ser
									P04637	P53_HUMAN	li-fraumeni syndrome	VAR_005886	p.Cys141Tyr
									P04637	P53_HUMAN	sporadic cancer	VAR_045793	p.Cys141Ala
									P04637	P53_HUMAN	sporadic cancers	VAR_005884	p.Cys141Gly
									P04637	P53_HUMAN	sporadic cancers	VAR_005885	p.Cys141Phe
									P04637	P53_HUMAN	sporadic cancers	VAR_044775	p.Cys141Arg
									P04637	P53_HUMAN	sporadic cancers	VAR_044776	p.Cys141Ser
									P04637	P53_HUMAN	sporadic cancers	VAR_044777	p.Cys141Trp
									P04637	P53_HUMAN	sporadic cancers	VAR_005910	p.Ile162Ser
									P04637	P53_HUMAN	sporadic cancers	VAR_005911	p.Ile162Val
									P04637	P53_HUMAN	sporadic cancers	VAR_044865	p.Ile162Phe
									P04637	P53_HUMAN	sporadic cancers	VAR_044866	p.Ile162Met
									P04637	P53_HUMAN	sporadic cancers	VAR_044868	p.Ile162Thr
									P04637	P53_HUMAN	li-fraumeni syndrome	VAR_033035	p.Tyr163Cys
									P04637	P53_HUMAN	sporadic cancer	VAR_044870	p.Tyr163Phe
									P04637	P53_HUMAN	sporadic cancers	VAR_005912	p.Tyr163His
									P04637	P53_HUMAN	sporadic cancers	VAR_044869	p.Tyr163Asp
									P04637	P53_HUMAN	sporadic cancers	VAR_044871	p.Tyr163Asn
									P04637	P53_HUMAN	sporadic cancers	VAR_044872	p.Tyr163Ser
									P04637	P53_HUMAN	sporadic cancers	VAR_005913	p.Lys164Asn
									P04637	P53_HUMAN	sporadic cancers	VAR_005914	p.Lys164Gln
									P04637	P53_HUMAN	sporadic cancers	VAR_044873	p.Lys164Glu
									P04637	P53_HUMAN	sporadic cancers	VAR_044874	p.Lys164Met
									P04637	P53_HUMAN	sporadic cancers	VAR_044875	p.Lys164Arg
									P04637	P53_HUMAN	sporadic cancers	VAR_044876	p.Lys164Thr
									P04637	P53_HUMAN	sporadic cancer	VAR_044878	p.Gln165His
									P04637	P53_HUMAN	sporadic cancers	VAR_005915	p.Gln165Leu
									P04637	P53_HUMAN	sporadic cancers	VAR_005916	p.Gln165Arg
									P04637	P53_HUMAN	sporadic cancers	VAR_044877	p.Gln165Glu
									P04637	P53_HUMAN	sporadic cancers	VAR_044879	p.Gln165Pro
									P04637	P53_HUMAN	sporadic cancer	VAR_044881	p.Ser166Gly
									P04637	P53_HUMAN	sporadic cancers	VAR_005917	p.Ser166Leu
									P04637	P53_HUMAN	sporadic cancers	VAR_044880	p.Ser166Ala
									P04637	P53_HUMAN	sporadic cancers	VAR_044882	p.Ser166Pro
									P04637	P53_HUMAN	sporadic cancers	VAR_044883	p.Ser166Thr
									P04637	P53_HUMAN	sporadic cancer	VAR_045408	p.Leu289Arg
									P04637	P53_HUMAN	sporadic cancers	VAR_045405	p.Leu289Phe
									P04637	P53_HUMAN	sporadic cancers	VAR_045406	p.Leu289His
									P04637	P53_HUMAN	sporadic cancers	VAR_045407	p.Leu289Pro
									P04637	P53_HUMAN	sporadic cancers	VAR_045409	p.Leu289Val
									P04637	P53_HUMAN	li-fraumeni syndrome	VAR_045411	p.Arg290His
									P04637	P53_HUMAN	li-fraumeni syndrome	VAR_045412	p.Arg290Leu
									P04637	P53_HUMAN	sporadic cancers	VAR_045410	p.Arg290Cys
									P04637	P53_HUMAN	sporadic cancers	VAR_045413	p.Lys291Glu
									P04637	P53_HUMAN	sporadic cancers	VAR_045414	p.Lys291Met
									P04637	P53_HUMAN	sporadic cancers	VAR_045415	p.Lys291Asn
									P04637	P53_HUMAN	sporadic cancers	VAR_045416	p.Lys291Arg
									P04637	P53_HUMAN	sporadic cancers	VAR_045417	p.Lys291Thr
									P04637	P53_HUMAN	sporadic cancers	VAR_047205	p.Lys291Gln
									P04637	P53_HUMAN	li-fraumeni syndrome	VAR_015819	p.Lys292Ile
									P04637	P53_HUMAN	sporadic cancer	VAR_045420	p.Lys292Gln
									P04637	P53_HUMAN	sporadic cancer	VAR_045872	p.Lys292Gly
									P04637	P53_HUMAN	sporadic cancers	VAR_045418	p.Lys292Glu
									P04637	P53_HUMAN	sporadic cancers	VAR_045419	p.Lys292Asn
									P04637	P53_HUMAN	sporadic cancers	VAR_045421	p.Lys292Arg
									P04637	P53_HUMAN	sporadic cancers	VAR_045422	p.Lys292Thr
									P04637	P53_HUMAN	sporadic cancer	VAR_045423	p.Gly293Ala
									P04637	P53_HUMAN	sporadic cancers	VAR_045424	p.Gly293Arg
									P04637	P53_HUMAN	sporadic cancers	VAR_045425	p.Gly293Val
									P04637	P53_HUMAN	sporadic cancer	VAR_045427	p.Glu294Ala
									P04637	P53_HUMAN	sporadic cancers	VAR_045428	p.Glu294Asp
									P04637	P53_HUMAN	sporadic cancers	VAR_045429	p.Glu294Gly
									P04637	P53_HUMAN	sporadic cancers	VAR_045430	p.Glu294Gln
									P04637	P53_HUMAN	sporadic cancers	VAR_045431	p.Glu294Val
									P04637	P53_HUMAN	sporadic cancers	VAR_047206	p.Glu294Lys
									P04637	P53_HUMAN	sporadic cancers	VAR_045463	p.Ser303Cys
									P04637	P53_HUMAN	sporadic cancers	VAR_045464	p.Ser303Ile
									P04637	P53_HUMAN	sporadic cancers	VAR_045465	p.Ser303Asn
									P04637	P53_HUMAN	sporadic cancers	VAR_045466	p.Ser303Thr
									P04637	P53_HUMAN	sporadic cancer	VAR_045469	p.Thr304Asn
									P04637	P53_HUMAN	sporadic cancer	VAR_047209	p.Thr304Ser
									P04637	P53_HUMAN	sporadic cancers	VAR_045467	p.Thr304Ala
									P04637	P53_HUMAN	sporadic cancers	VAR_045468	p.Thr304Ile
									P04637	P53_HUMAN	sporadic cancer	VAR_045470	p.Lys305Glu
									P04637	P53_HUMAN	sporadic cancer	VAR_045474	p.Lys305Thr
									P04637	P53_HUMAN	sporadic cancers	VAR_045472	p.Lys305Asn
									P04637	P53_HUMAN	sporadic cancers	VAR_045473	p.Lys305Arg
									P04637	P53_HUMAN	li-fraumeni syndrome	VAR_045475	p.Arg306Pro
									P04637	P53_HUMAN	sporadic cancers	VAR_006036	p.Arg306Gln
									P04637	P53_HUMAN	sporadic cancer	VAR_045476	p.Ala307Pro
									P04637	P53_HUMAN	sporadic cancers	VAR_006037	p.Ala307Thr
									P04637	P53_HUMAN	sporadic cancers	VAR_045477	p.Ala307Ser
									P04637	P53_HUMAN	sporadic cancer	VAR_045501	p.Gln317Pro
									P04637	P53_HUMAN	sporadic cancer	VAR_047210	p.Gln317Leu
									P04637	P53_HUMAN	sporadic cancers	VAR_045500	p.Gln317Lys
									P04637	P53_HUMAN	sporadic cancers	VAR_045502	p.Gln317Arg
									P04637	P53_HUMAN	sporadic cancers	VAR_045503	p.Pro318Leu
									P04637	P53_HUMAN	sporadic cancer	VAR_045505	p.Lys319Asn
									P04637	P53_HUMAN	sporadic cancer	VAR_045506	p.Lys319Arg
									P04637	P53_HUMAN	sporadic cancers	VAR_045504	p.Lys319Glu
									P04637	P53_HUMAN	sporadic cancers	VAR_045507	p.Lys320Asn
									P04637	P53_HUMAN	kidney cancer	VAR_045508	p.Lys321Glu
									P04637	P53_HUMAN	sporadic cancer	VAR_045509	p.Lys321Arg
									P04637	P53_HUMAN	sporadic cancers	VAR_045510	p.Pro322Leu
									P04637	P53_HUMAN	sporadic cancers	VAR_045511	p.Pro322Arg
									P04637	P53_HUMAN	sporadic cancer	VAR_045512	p.Leu323Met
									P04637	P53_HUMAN	sporadic cancer	VAR_045513	p.Leu323Pro
									P04637	P53_HUMAN	sporadic cancer	VAR_045514	p.Leu323Arg
									P04637	P53_HUMAN	sporadic cancer	VAR_045874	p.Leu323Gly
									P04637	P53_HUMAN	sporadic cancer	VAR_047211	p.Leu323Val
									P04637	P53_HUMAN	sporadic cancer	VAR_045553	p.Glu349Asp
									P04637	P53_HUMAN	sporadic cancer	VAR_045554	p.Asp352His
									P04637	P53_HUMAN	sporadic cancer	VAR_045555	p.Ala353Thr
									P04637	P53_HUMAN	sporadic cancer	VAR_045558	p.Gly356Ala
									P04637	P53_HUMAN	sporadic cancer	VAR_045559	p.Gly356Trp
									P04637	P53_HUMAN	sporadic cancer	VAR_045560	p.Glu358Asp
									P04637	P53_HUMAN	sporadic cancer	VAR_045561	p.Glu358Lys
									P04637	P53_HUMAN	sporadic cancer	VAR_045569	p.Lys370Gln
									P04637	P53_HUMAN	sporadic cancers	VAR_045572	p.Arg379His
									P04637	P53_HUMAN	sporadic cancer	VAR_045573	p.Phe385Leu
									P04637	P53_HUMAN	sporadic cancer	VAR_044654	p.Ser99Pro
									P04637	P53_HUMAN	sporadic cancers	VAR_044653	p.Ser99Phe
									P06213	INSR_HUMAN	insulin-resistant diabetes mellitus with acanthosis nigricans type a	VAR_015923	p.Ala1055Val
									P06280	AGAL_HUMAN	fabry disease	VAR_012408	p.Ile242Asn
									P06280	AGAL_HUMAN	fabry disease	VAR_000482	p.Asp313Tyr
									P06280	AGAL_HUMAN	fabry disease	VAR_000483	p.Val316Glu
									P06280	AGAL_HUMAN	fabry disease	VAR_000484	p.Gln327Lys
									P06280	AGAL_HUMAN	fabry disease	VAR_000485	p.Gly328Arg
									P06280	AGAL_HUMAN	fabry disease	VAR_000486	p.Gly328Ala
									P06280	AGAL_HUMAN	fabry disease	VAR_062566	p.Gly328Val
									P06744	G6PI_HUMAN	hemolytic anemia, non-spherocytic	VAR_002522	p.Thr195Ile
									P06744	G6PI_HUMAN	hemolytic anemia, non-spherocytic	VAR_002523	p.Thr224Met
									P06744	G6PI_HUMAN	hemolytic anemia, non-spherocytic	VAR_002518	p.Arg75Gly
									P07333	CSF1R_HUMAN	leukoencephalopathy, diffuse hereditary, with spheroids	VAR_067409	p.Leu868Pro
									P07737	PROF1_HUMAN	amyotrophic lateral sclerosis 18	VAR_068925	p.Cys71Gly
									P07741	APT_HUMAN	adenine phosphoribosyltransferase deficiency	VAR_069049	p.Leu33Pro
									P07902	GALT_HUMAN	galactosemia	VAR_002564	p.Gln118His
									P07951	TPM2_HUMAN	nemaline myopathy 4	VAR_013468	p.Glu117Ala
									P07951	TPM2_HUMAN	nemaline myopathy 4	VAR_013469	p.Gln147Pro
									P08236	BGLR_HUMAN	mucopolysaccharidosis 7	VAR_037914	p.Cys38Gly
									P08581	MET_HUMAN	renal cell carcinoma papillary	VAR_006287	p.Val1188Leu
									P08581	MET_HUMAN	renal cell carcinoma papillary	VAR_006292	p.Tyr1230Cys
									P08581	MET_HUMAN	renal cell carcinoma papillary	VAR_006293	p.Tyr1230His
									P08581	MET_HUMAN	renal cell carcinoma papillary	VAR_032491	p.Tyr1230Asp
									P08779	K1C16_HUMAN	pachyonychia congenita 1	VAR_003846	p.Leu132Pro
									P10275	ANDR_HUMAN	prostate cancer	VAR_009834	p.Arg846Gly
									P10809	CH60_HUMAN	leukodystrophy, hypomyelinating, 4	VAR_054785	p.Asp29Gly
									P10809	CH60_HUMAN	spastic paraplegia 13, autosomal dominant	VAR_026748	p.Val98Ile
									P11217	PYGM_HUMAN	glycogen storage disease 5	VAR_014004	p.Leu292Pro
									P11387	TOP1_HUMAN	breast cancer	VAR_036555	p.Lys326Arg
									P11387	TOP1_HUMAN	breast cancer	VAR_036555	p.Lys326Arg
									P11413	G6PD_HUMAN	anemia, non-spherocytic hemolytic	VAR_002504	p.Gly410Asp
									P11802	CDK4_HUMAN	melanoma, cutaneous malignant 3	VAR_006200	p.Arg24Cys
									P11802	CDK4_HUMAN	melanoma, cutaneous malignant 3	VAR_006201	p.Arg24His
									P12235	ADT1_HUMAN	progressive external ophthalmoplegia with mitochondrial dna deletions, autosomal dominant, 2	VAR_022459	p.Leu98Pro
									P13645	K1C10_HUMAN	epidermolytic hyperkeratosis	VAR_003832	p.Leu161Ser
									P13647	K2C5_HUMAN	epidermolysis bullosa simplex, koebner type	VAR_010455	p.Lys173Asn
									P13647	K2C5_HUMAN	epidermolysis bullosa simplex, dowling-meara type	VAR_010456	p.Leu175Phe
									P13647	K2C5_HUMAN	epidermolysis bullosa simplex, dowling-meara type	VAR_010457	p.Asn176Ser
									P13647	K2C5_HUMAN	epidermolysis bullosa simplex, weber-cockayne type	VAR_026538	p.Asn177Ser
									P13647	K2C5_HUMAN	epidermolysis bullosa simplex, dowling-meara type	VAR_010458	p.Phe179Ser
									P13647	K2C5_HUMAN	epidermolysis bullosa simplex, koebner type	VAR_013829	p.Val186Leu
									P13647	K2C5_HUMAN	epidermolysis bullosa simplex, koebner type	VAR_031642	p.Val186Met
									P16401	H15_HUMAN	colorectal cancer	VAR_036204	p.Gly86Asp
									P16435	NCPR_HUMAN	antley-bixler syndrome, with genital anomalies and disordered steroidogenesis	VAR_021157	p.Val489Glu
									P17302	CXA1_HUMAN	oculodentodigital dysplasia	VAR_058992	p.Leu11Pro
									P17302	CXA1_HUMAN	oculodentodigital dysplasia	VAR_058991	p.Leu7Val
									P17661	DESM_HUMAN	myopathy, myofibrillar, 1	VAR_042458	p.Arg406Trp
									P18074	ERCC2_HUMAN	xeroderma pigmentosum complementation group d	VAR_008192	p.Arg601Leu
									P18074	ERCC2_HUMAN	xeroderma pigmentosum complementation group d	VAR_017289	p.Arg601Trp
									P18074	ERCC2_HUMAN	xeroderma pigmentosum complementation group d	VAR_003627	p.Gly602Asp
									P18074	ERCC2_HUMAN	cerebro-oculo-facio-skeletal syndrome 2	VAR_017293	p.Asp681Asn
									P18074	ERCC2_HUMAN	xeroderma pigmentosum complementation group d	VAR_017293	p.Asp681Asn
									P18074	ERCC2_HUMAN	xeroderma pigmentosum complementation group d	VAR_008197	p.Arg683Gln
									P18074	ERCC2_HUMAN	xeroderma pigmentosum complementation group d	VAR_008198	p.Arg683Trp
									P22830	HEMH_HUMAN	erythropoietic protoporphyria	VAR_002383	p.Gly55Cys
									P24752	THIL_HUMAN	3-ketothiolase deficiency	VAR_007501	p.Gly183Arg
									P25445	TNR6_HUMAN	autoimmune lymphoproliferative syndrome 1a	VAR_058910	p.Ile262Ser
									P25445	TNR6_HUMAN	non-hodgkin lymphoma	VAR_013432	p.Asn264Lys
									P27635	RL10_HUMAN	autism, x-linked 5	VAR_027795	p.Leu206Met
									P29033	CXB2_HUMAN	deafness, autosomal recessive, 1a	VAR_002145	p.Ser113Arg
									P29317	EPHA2_HUMAN	gastric adenocarcinoma	VAR_042124	p.Gly777Ser
									P30154	2AAB_HUMAN	colorectal cancer	VAR_022902	p.Val498Glu
									P30154	2AAB_HUMAN	colorectal cancer	VAR_022903	p.Leu499Ile
									P30613	KPYR_HUMAN	pyruvate kinase deficiency of red cells	VAR_011456	p.Lys348Asn
									P30613	KPYR_HUMAN	pyruvate kinase deficiency of red cells	VAR_011477	p.Ala352Asp
									P31785	IL2RG_HUMAN	x-linked combined immunodeficiency	VAR_002702	p.Leu293Gln
									P35579	MYH9_HUMAN	may-hegglin anomaly	VAR_018310	p.Lys373Asn
									P35579	MYH9_HUMAN	sebastian syndrome	VAR_018310	p.Lys373Asn
									P35579	MYH9_HUMAN	breast cancer	VAR_036006	p.Lys810Asn
									P35670	ATP7B_HUMAN	wilson disease	VAR_044474	p.Thr1029Ile
									P35908	K22E_HUMAN	ichthyosis bullosa of siemens	VAR_003865	p.Gln181Pro
									P35908	K22E_HUMAN	ichthyosis bullosa of siemens	VAR_010514	p.Ile182Asn
									P35908	K22E_HUMAN	ichthyosis bullosa of siemens	VAR_009185	p.Asn186Tyr
									P35908	K22E_HUMAN	ichthyosis bullosa of siemens	VAR_010515	p.Asn186Asp
									P35908	K22E_HUMAN	ichthyosis bullosa of siemens	VAR_017829	p.Asn186Lys
									P36551	HEM6_HUMAN	hereditary coproporphyria	VAR_002162	p.Lys404Glu
									P39019	RS19_HUMAN	diamond-blackfan anemia 1	VAR_055442	p.Thr76Pro
									P40337	VHL_HUMAN	pheochromocytoma	VAR_035001	p.Leu198Gln
									P40337	VHL_HUMAN	von hippel-lindau disease	VAR_005778	p.Leu198Arg
									P40939	ECHA_HUMAN	trifunctional protein deficiency	VAR_021126	p.Ile305Asn
									P43034	LIS1_HUMAN	lissencephaly 1	VAR_007724	p.His149Arg
									P43034	LIS1_HUMAN	lissencephaly 1	VAR_015398	p.Phe31Ser
									P43246	MSH2_HUMAN	hereditary non-polyposis colorectal cancer 1	VAR_043759	p.Cys333Tyr
									P43246	MSH2_HUMAN	hereditary non-polyposis colorectal cancer 1	VAR_012942	p.Ser554Arg
									P43246	MSH2_HUMAN	hereditary non-polyposis colorectal cancer 1	VAR_043769	p.Thr564Ala
									P43246	MSH2_HUMAN	gastric cancer	VAR_043791	p.Ala870Gly
									P43246	MSH2_HUMAN	gastric cancer	VAR_043792	p.Cys873Gly
									P43358	MAGA4_HUMAN	breast cancer	VAR_036582	p.Gly153Asp
									P43358	MAGA4_HUMAN	breast cancer	VAR_036582	p.Gly153Asp
									P43490	NAMPT_HUMAN	colorectal cancer	VAR_036614	p.Leu176Ser
									P45985	MP2K4_HUMAN	lung squamous cell carcinoma	VAR_040818	p.Gln142Leu
									P46781	RS9_HUMAN	breast cancer	VAR_036543	p.Val137Phe
									P48637	GSHB_HUMAN	glutathione synthetase deficiency	VAR_003603	p.Leu188Pro
									P49748	ACADV_HUMAN	acyl-coa dehydrogenase very long-chain deficiency	VAR_010104	p.Ala490Pro
									P49768	PSN1_HUMAN	renal cell carcinoma	VAR_064747	p.Tyr315Cys
									P51570	GALK1_HUMAN	galactosemia ii	VAR_023488	p.Arg68Cys
									P51608	MECP2_HUMAN	rett syndrome	VAR_018188	p.Gln128Pro
									P51648	AL3A2_HUMAN	sjoegren-larsson syndrome	VAR_017519	p.Lys266Asn
									P51648	AL3A2_HUMAN	sjoegren-larsson syndrome	VAR_017521	p.Met328Ile
									P53985	MOT1_HUMAN	symptomatic deficiency in lactate transport	VAR_010435	p.Gly472Arg
									P54577	SYYC_HUMAN	charcot-marie-tooth disease, dominant, intermediate type, c	VAR_026684	p.Glu196Lys
									P55072	TERA_HUMAN	inclusion body myopathy with early-onset paget disease with or without frontotemporal dementia 1	VAR_033022	p.Ala232Glu
									P60174	TPIS_HUMAN	triosephosphate isomerase deficiency	VAR_007538	p.Val192Met
									P60484	PTEN_HUMAN	glioma	VAR_007457	p.Arg15Ser
									P60484	PTEN_HUMAN	glioma	VAR_007457	p.Arg15Ser
									P60484	PTEN_HUMAN	cowden syndrome 1	VAR_008741	p.Lys289Glu
									P60891	PRPS1_HUMAN	phosphoribosylpyrophosphate synthetase superactivity	VAR_016047	p.His193Gln
									P61218	RPAB2_HUMAN	breast cancer	VAR_036571	p.Tyr60Asn
									P62736	ACTA_HUMAN	aortic aneurysm, familial thoracic 6	VAR_045915	p.Asn117Thr
									P62736	ACTA_HUMAN	aortic aneurysm, familial thoracic 6	VAR_062581	p.Thr326Asn
									P62913	RL11_HUMAN	diamond-blackfan anemia 7	VAR_055448	p.Leu20His
									P63092	GNAS2_HUMAN	pseudohypoparathyroidism 1a	VAR_031881	p.Lys338Asn
									P68133	ACTS_HUMAN	nemaline myopathy 3	VAR_062439	p.Ala116Thr
									P68133	ACTS_HUMAN	nemaline myopathy 3	VAR_011682	p.Asn117Ser
									P68133	ACTS_HUMAN	nemaline myopathy 3	VAR_062440	p.Asn117Thr
									P68133	ACTS_HUMAN	nemaline myopathy 3	VAR_062432	p.Thr68Ile
									P68133	ACTS_HUMAN	nemaline myopathy 3	VAR_062438	p.Glu85Lys
									P78527	PRKDC_HUMAN	lung adenocarcinoma	VAR_041602	p.Lys263Asn
									P99999	CYC_HUMAN	thrombocytopenia 4	VAR_044450	p.Gly42Ser
									Q01968	OCRL_HUMAN	lowe oculocerebrorenal syndrome	VAR_010176	p.Asp451Gly
									Q01968	OCRL_HUMAN	lowe oculocerebrorenal syndrome	VAR_064782	p.Asp451Asn
									Q01968	OCRL_HUMAN	lowe oculocerebrorenal syndrome	VAR_010177	p.Phe463Ser
									Q02127	PYRD_HUMAN	postaxial acrofacial dysostosis	VAR_062420	p.Arg346Trp
									Q02878	RL6_HUMAN	colorectal cancer	VAR_036437	p.Lys100Gln
									Q03393	PTPS_HUMAN	hyperphenylalaninemia, bh4-deficient, a	VAR_006820	p.Asn36Lys
									Q04695	K1C17_HUMAN	pachyonychia congenita 2	VAR_017074	p.Val102Met
									Q04695	K1C17_HUMAN	pachyonychia congenita 2	VAR_017073	p.Leu99Pro
									Q06187	BTK_HUMAN	x-linked agammaglobulinemia	VAR_006239	p.Leu408Pro
									Q06187	BTK_HUMAN	x-linked agammaglobulinemia	VAR_008324	p.Val535Phe
									Q13509	TBB3_HUMAN	congenital fibrosis of extraocular muscles 3a	VAR_062762	p.Arg380Cys
									Q13950	RUNX2_HUMAN	cleidocranial dysplasia	VAR_012138	p.Met175Arg
									Q13950	RUNX2_HUMAN	cleidocranial dysplasia	VAR_064090	p.Met175Lys
									Q13950	RUNX2_HUMAN	cleidocranial dysplasia	VAR_064091	p.Met175Val
									Q14204	DYHC1_HUMAN	spinal muscular atrophy, lower extremity-predominant 1, autosomal dominant	VAR_067821	p.Lys671Glu
									Q14654	IRK11_HUMAN	diabetes mellitus, permanent neonatal	VAR_026516	p.Tyr330Cys
									Q14654	IRK11_HUMAN	diabetes mellitus, permanent neonatal	VAR_031348	p.Tyr330Ser
									Q14654	IRK11_HUMAN	diabetes mellitus, permanent neonatal	VAR_026517	p.Phe333Ile
									Q15833	STXB2_HUMAN	familial hemophagocytic lymphohistiocytosis 5	VAR_063814	p.Leu209Pro
									Q16585	SGCB_HUMAN	limb-girdle muscular dystrophy 2e	VAR_010395	p.Thr151Arg
									Q16595	FRDA_HUMAN	friedreich ataxia	VAR_016066	p.Leu198Arg
									Q16678	CP1B1_HUMAN	glaucoma 3, primary congenital, a	VAR_054233	p.Gln144Pro
									Q16678	CP1B1_HUMAN	glaucoma 3, primary congenital, a	VAR_054234	p.Gln144Arg
									Q2NKJ3	CTC1_HUMAN	cerebroretinal microangiopathy with calcifications and cysts	VAR_067375	p.Arg975Gly
									Q53GS7	GLE1_HUMAN	lethal congenital contracture syndrome 1	VAR_043875	p.Arg569His
									Q71U36	TBA1A_HUMAN	lissencephaly 3	VAR_039336	p.Arg402Cys
									Q71U36	TBA1A_HUMAN	lissencephaly 3	VAR_039337	p.Arg402His
									Q7Z333	SETX_HUMAN	spinocerebellar ataxia, autosomal recessive, 1	VAR_036650	p.Pro2368Arg
									Q7Z333	SETX_HUMAN	spinocerebellar ataxia, autosomal recessive, 1	VAR_036648	p.Gln653Lys
									Q8NBS3	S4A11_HUMAN	corneal dystrophy, fuchs endothelial, 4	VAR_047813	p.Thr754Met
									Q8TDP1	RNH2C_HUMAN	aicardi-goutieres syndrome 3	VAR_027288	p.Lys143Ile
									Q92574	TSC1_HUMAN	tuberous sclerosis 1	VAR_009408	p.Ala726Glu
									Q92734	TFG_HUMAN	colorectal cancer	VAR_035668	p.Ala149Ser
									Q92889	XPF_HUMAN	xeroderma pigmentosum complementation group f	VAR_008201	p.Arg454Trp
									Q96EF0	MTMR8_HUMAN	breast cancer	VAR_042688	p.Trp127Arg
									Q99456	K1C12_HUMAN	corneal dystrophy, meesmann	VAR_008527	p.Leu140Arg
									Q99456	K1C12_HUMAN	corneal dystrophy, meesmann	VAR_003835	p.Val143Leu
									Q99497	PARK7_HUMAN	parkinson disease 7	VAR_020496	p.Asp149Ala
									Q99612	KLF6_HUMAN	cancer	VAR_065136	p.Trp64Arg
									Q99836	MYD88_HUMAN	myd88 deficiency	VAR_047953	p.Leu93Pro
									Q99879	H2B1M_HUMAN	colorectal cancer	VAR_036205	p.His110Tyr
									Q9NVF7	FBX28_HUMAN	renal cell carcinoma case	VAR_064713	p.Pro345His
									Q9NZJ4	SACS_HUMAN	colorectal cancer	VAR_035986	p.Met1795Ile
									Q9P032	NDUF4_HUMAN	mitochondrial complex i deficiency	VAR_044329	p.Leu65Pro
									Q9P0J0	NDUAD_HUMAN	hurthle cell variant of papillary carcinoma	VAR_045984	p.Lys5Asn
									Q9UI10	EI2BD_HUMAN	leukodystrophy with vanishing white matter	VAR_016843	p.Cys465Arg
									Q9UPZ3	HPS5_HUMAN	hermansky-pudlak syndrome 5	VAR_062285	p.Leu624Arg
									Q9Y276	BCS1_HUMAN	gracile syndrome	VAR_018160	p.Arg144Gln
									Q9Y276	BCS1_HUMAN	bjoernstad syndrome	VAR_032091	p.Gln302Glu
									Q9Y6K9	NEMO_HUMAN	ectodermal dysplasia, anhidrotic, with immunodeficiency x-linked	VAR_011321	p.Leu227Pro
									Q9Y6K9	NEMO_HUMAN	ectodermal dysplasia, anhidrotic, with immunodeficiency x-linked	VAR_011323	p.Asp311Asn
									Q9Y6K9	NEMO_HUMAN	x-linked familial atypical micobacteriosis 1	VAR_031960	p.Arg319Gln
									Q9Y6K9	NEMO_HUMAN	incontinentia pigmenti	VAR_042666	p.Ala323Pro

## Sheet: Acetylation
Acetylation[Exact Match]								Acetylation[±2]
	O43602	DCX_HUMAN	subcortical band heterotopia x-linked	VAR_026023	p.Lys131Asn				O00294	TULP1_HUMAN	retinitis pigmentosa 14	VAR_008277	p.Lys261Thr
	O60832	DKC1_HUMAN	dyskeratosis congenita, x-linked	VAR_010076	p.Ala2Val				O14497	ARI1A_HUMAN	breast cancer	VAR_068022	p.Ile1907Phe
	P00480	OTC_HUMAN	ornithine carbamoyltransferase deficiency	VAR_004863	p.Lys88Asn				O15305	PMM2_HUMAN	congenital disorder of glycosylation 1a	VAR_022486	p.Phe144Leu
	P02545	LMNA_HUMAN	cardiomyopathy, dilated 1a	VAR_039759	p.Lys97Glu				O15305	PMM2_HUMAN	congenital disorder of glycosylation 1a	VAR_022487	p.Asp148Asn
	P04637	P53_HUMAN	sporadic cancer	VAR_044701	p.Lys120Gln				O15305	PMM2_HUMAN	congenital disorder of glycosylation 1a	VAR_022488	p.Glu151Gly
	P04637	P53_HUMAN	sporadic cancers	VAR_044699	p.Lys120Glu				O15305	PMM2_HUMAN	congenital disorder of glycosylation 1a	VAR_022489	p.Ile153Thr
	P04637	P53_HUMAN	sporadic cancers	VAR_044700	p.Lys120Met				O43602	DCX_HUMAN	lissencephaly, x-linked 1	VAR_007819	p.Leu124Ser
	P04637	P53_HUMAN	sporadic cancers	VAR_044702	p.Lys120Arg				O43602	DCX_HUMAN	lissencephaly, x-linked 1	VAR_007820	p.Ser128Arg
	P04637	P53_HUMAN	sporadic cancers	VAR_005913	p.Lys164Asn				O43602	DCX_HUMAN	subcortical band heterotopia x-linked	VAR_007820	p.Ser128Arg
	P04637	P53_HUMAN	sporadic cancers	VAR_005914	p.Lys164Gln				O43602	DCX_HUMAN	subcortical band heterotopia x-linked	VAR_026023	p.Lys131Asn
	P04637	P53_HUMAN	sporadic cancers	VAR_044873	p.Lys164Glu				O60832	DKC1_HUMAN	dyskeratosis congenita, x-linked	VAR_010076	p.Ala2Val
	P04637	P53_HUMAN	sporadic cancers	VAR_044874	p.Lys164Met				O60880	SH21A_HUMAN	lymphoproliferative syndrome, x-linked, 1	VAR_048017	p.Ile84Thr
	P04637	P53_HUMAN	sporadic cancers	VAR_044875	p.Lys164Arg				O60880	SH21A_HUMAN	lymphoproliferative syndrome, x-linked, 1	VAR_048018	p.Phe87Ser
	P04637	P53_HUMAN	sporadic cancers	VAR_044876	p.Lys164Thr				O95140	MFN2_HUMAN	charcot-marie-tooth disease 2a2	VAR_022464	p.Lys357Asn
	P04637	P53_HUMAN	li-fraumeni syndrome	VAR_015819	p.Lys292Ile				O95140	MFN2_HUMAN	charcot-marie-tooth disease 6	VAR_029879	p.His361Tyr
	P04637	P53_HUMAN	sporadic cancer	VAR_045420	p.Lys292Gln				O95409	ZIC2_HUMAN	holoprosencephaly 5	VAR_058604	p.Cys335Phe
	P04637	P53_HUMAN	sporadic cancer	VAR_045872	p.Lys292Gly				O95999	BCL10_HUMAN	malt lymphoma and mesothelioma	VAR_013208	p.Ala5Ser
	P04637	P53_HUMAN	sporadic cancers	VAR_045418	p.Lys292Glu				O95999	BCL10_HUMAN	mesothelioma	VAR_013208	p.Ala5Ser
	P04637	P53_HUMAN	sporadic cancers	VAR_045419	p.Lys292Asn				P00367	DHE3_HUMAN	familial hyperinsulinemic hypoglycemia 6	VAR_008666	p.Ser498Leu
	P04637	P53_HUMAN	sporadic cancers	VAR_045421	p.Lys292Arg				P00367	DHE3_HUMAN	familial hyperinsulinemic hypoglycemia 6	VAR_008667	p.Gly499Asp
	P04637	P53_HUMAN	sporadic cancers	VAR_045422	p.Lys292Thr				P00367	DHE3_HUMAN	familial hyperinsulinemic hypoglycemia 6	VAR_008668	p.Gly499Ser
	P04637	P53_HUMAN	sporadic cancer	VAR_045470	p.Lys305Glu				P00367	DHE3_HUMAN	familial hyperinsulinemic hypoglycemia 6	VAR_008669	p.Ser501Pro
	P04637	P53_HUMAN	sporadic cancer	VAR_045474	p.Lys305Thr				P00367	DHE3_HUMAN	familial hyperinsulinemic hypoglycemia 6	VAR_008670	p.His507Tyr
	P04637	P53_HUMAN	sporadic cancers	VAR_045472	p.Lys305Asn				P00441	SODC_HUMAN	amyotrophic lateral sclerosis 1	VAR_007156	p.Arg116Gly
	P04637	P53_HUMAN	sporadic cancers	VAR_045473	p.Lys305Arg				P00441	SODC_HUMAN	amyotrophic lateral sclerosis 1	VAR_045883	p.Val119Leu
	P04637	P53_HUMAN	sporadic cancer	VAR_045505	p.Lys319Asn				P00441	SODC_HUMAN	amyotrophic lateral sclerosis 1	VAR_008722	p.Asp125Val
	P04637	P53_HUMAN	sporadic cancer	VAR_045506	p.Lys319Arg				P00441	SODC_HUMAN	amyotrophic lateral sclerosis 1	VAR_045884	p.Asp125Gly
	P04637	P53_HUMAN	sporadic cancers	VAR_045504	p.Lys319Glu				P00441	SODC_HUMAN	amyotrophic lateral sclerosis 1	VAR_007157	p.Asp126His
	P04637	P53_HUMAN	sporadic cancers	VAR_045507	p.Lys320Asn				P00441	SODC_HUMAN	amyotrophic lateral sclerosis 1	VAR_013539	p.Leu127Ser
	P04637	P53_HUMAN	kidney cancer	VAR_045508	p.Lys321Glu				P00441	SODC_HUMAN	amyotrophic lateral sclerosis 1	VAR_007130	p.Ala5Thr
	P04637	P53_HUMAN	sporadic cancer	VAR_045509	p.Lys321Arg				P00441	SODC_HUMAN	amyotrophic lateral sclerosis 1	VAR_007131	p.Ala5Val
	P04637	P53_HUMAN	sporadic cancer	VAR_045569	p.Lys370Gln				P00441	SODC_HUMAN	amyotrophic lateral sclerosis 1	VAR_013518	p.Ala5Ser
	P10275	ANDR_HUMAN	prostate cancer	VAR_009758	p.Lys630Thr				P00441	SODC_HUMAN	amyotrophic lateral sclerosis 1	VAR_008717	p.Cys7Phe
	P19429	TNNI3_HUMAN	cardiomyopathy, dilated 2a	VAR_043989	p.Ala2Val				P00441	SODC_HUMAN	amyotrophic lateral sclerosis 1	VAR_007132	p.Val8Glu
	P30566	PUR8_HUMAN	adenylosuccinase deficiency	VAR_016930	p.Ala2Val				P00441	SODC_HUMAN	amyotrophic lateral sclerosis 1	VAR_013519	p.Leu9Gln
	P30613	KPYR_HUMAN	pyruvate kinase deficiency of red cells	VAR_011456	p.Lys348Asn				P00441	SODC_HUMAN	amyotrophic lateral sclerosis 1	VAR_013520	p.Leu9Val
	P35914	HMGCL_HUMAN	3-hydroxy-3-methylglutaryl-coa lyase deficiency	VAR_058441	p.Lys48Asn				P00451	FA8_HUMAN	hemophilia a	VAR_028604	p.Ala1610Ser
	Q06124	PTN11_HUMAN	noonan syndrome 1	VAR_027183	p.Thr2Ile				P00480	OTC_HUMAN	ornithine carbamoyltransferase deficiency	VAR_004913	p.Pro225Leu
	Q15181	IPYR_HUMAN	breast cancer	VAR_036358	p.Lys57Asn				P00480	OTC_HUMAN	ornithine carbamoyltransferase deficiency	VAR_004914	p.Pro225Arg
	Q16637	SMN_HUMAN	spinal muscular atrophy 2	VAR_005615	p.Ala2Gly				P00480	OTC_HUMAN	ornithine carbamoyltransferase deficiency	VAR_004915	p.Pro225Thr
	Q16637	SMN_HUMAN	spinal muscular atrophy 3	VAR_005615	p.Ala2Gly				P00480	OTC_HUMAN	ornithine carbamoyltransferase deficiency	VAR_004844	p.Gly39Cys
	Q6P1J9	CDC73_HUMAN	adenoma	VAR_064927	p.Ala2Ser				P00480	OTC_HUMAN	ornithine carbamoyltransferase deficiency	VAR_004845	p.Arg40Cys
									P00480	OTC_HUMAN	ornithine carbamoyltransferase deficiency	VAR_004846	p.Arg40His
									P00480	OTC_HUMAN	ornithine carbamoyltransferase deficiency	VAR_004848	p.Thr44Ile
									P00480	OTC_HUMAN	ornithine carbamoyltransferase deficiency	VAR_004849	p.Leu45Pro
									P00480	OTC_HUMAN	ornithine carbamoyltransferase deficiency	VAR_004850	p.Leu45Val
									P00480	OTC_HUMAN	ornithine carbamoyltransferase deficiency	VAR_004852	p.Asn47Ile
									P00480	OTC_HUMAN	ornithine carbamoyltransferase deficiency	VAR_004853	p.Gly50Arg
									P00480	OTC_HUMAN	ornithine carbamoyltransferase deficiency	VAR_004860	p.Gly83Asp
									P00480	OTC_HUMAN	ornithine carbamoyltransferase deficiency	VAR_004861	p.Gly83Arg
									P00480	OTC_HUMAN	ornithine carbamoyltransferase deficiency	VAR_004862	p.Glu87Lys
									P00480	OTC_HUMAN	ornithine carbamoyltransferase deficiency	VAR_004863	p.Lys88Asn
									P00480	OTC_HUMAN	ornithine carbamoyltransferase deficiency	VAR_004864	p.Ser90Arg
									P00480	OTC_HUMAN	ornithine carbamoyltransferase deficiency	VAR_004865	p.Arg92Gln
									P00480	OTC_HUMAN	ornithine carbamoyltransferase deficiency	VAR_004866	p.Thr93Ala
									P00480	OTC_HUMAN	ornithine carbamoyltransferase deficiency	VAR_004867	p.Arg94Thr
									P00491	PNPH_HUMAN	purine nucleoside phosphorylase deficiency	VAR_002244	p.Glu89Lys
									P00492	HPRT_HUMAN	gout hprt-related	VAR_006750	p.Gly7Asp
									P00492	HPRT_HUMAN	lesch-nyhan syndrome	VAR_006751	p.Val8Gly
									P00558	PGK1_HUMAN	phosphoglycerate kinase 1 deficiency	VAR_006077	p.Gly158Val
									P00558	PGK1_HUMAN	phosphoglycerate kinase 1 deficiency	VAR_006080	p.Arg206Pro
									P00558	PGK1_HUMAN	phosphoglycerate kinase 1 deficiency	VAR_006082	p.Val266Met
									P00558	PGK1_HUMAN	phosphoglycerate kinase 1 deficiency	VAR_006084	p.Asp285Val
									P00558	PGK1_HUMAN	phosphoglycerate kinase 1 deficiency	VAR_006086	p.Cys316Arg
									P00558	PGK1_HUMAN	phosphoglycerate kinase 1 deficiency	VAR_006076	p.Leu88Pro
									P00966	ASSY_HUMAN	citrullinemia 1	VAR_058343	p.Leu160Pro
									P01116	RASK_HUMAN	gastric cancer	VAR_064849	p.Lys5Asn
									P01116	RASK_HUMAN	noonan syndrome 3	VAR_065144	p.Lys5Glu
									P02489	CRYAA_HUMAN	breast cancer	VAR_036564	p.Asp105His
									P02538	K2C6A_HUMAN	pachyonychia congenita 1	VAR_017075	p.Phe174Val
									P02545	LMNA_HUMAN	cardiomyopathy, dilated 1a	VAR_070174	p.Arg101Pro
									P02545	LMNA_HUMAN	emery-dreifuss muscular dystrophy 2, autosomal dominant	VAR_039774	p.Tyr267Cys
									P02545	LMNA_HUMAN	emery-dreifuss muscular dystrophy 2, autosomal dominant	VAR_064965	p.Ser268Pro
									P02545	LMNA_HUMAN	emery-dreifuss muscular dystrophy 2, autosomal dominant	VAR_064966	p.Leu271Pro
									P02545	LMNA_HUMAN	cardiomyopathy, dilated 1a	VAR_039775	p.Glu317Lys
									P02545	LMNA_HUMAN	cardiomyopathy, dilated 1a	VAR_070179	p.Ala318Thr
									P02545	LMNA_HUMAN	emery-dreifuss muscular dystrophy 2, autosomal dominant	VAR_009986	p.Met371Lys
									P02545	LMNA_HUMAN	emery-dreifuss muscular dystrophy 2, autosomal dominant	VAR_039777	p.Arg377Leu
									P02545	LMNA_HUMAN	limb-girdle muscular dystrophy 1b	VAR_016205	p.Arg377His
									P02545	LMNA_HUMAN	limb-girdle muscular dystrophy 1b	VAR_039777	p.Arg377Leu
									P02545	LMNA_HUMAN	muscular dystrophy congenital lmna-related	VAR_063591	p.Leu380Ser
									P02545	LMNA_HUMAN	emery-dreifuss muscular dystrophy 2, autosomal dominant	VAR_039780	p.Asp446Val
									P02545	LMNA_HUMAN	emery-dreifuss muscular dystrophy 2, autosomal dominant	VAR_064971	p.Gly449Asp
									P02545	LMNA_HUMAN	emery-dreifuss muscular dystrophy 2, autosomal dominant	VAR_009988	p.Arg453Trp
									P02545	LMNA_HUMAN	muscular dystrophy congenital lmna-related	VAR_063592	p.Arg453Pro
									P02545	LMNA_HUMAN	emery-dreifuss muscular dystrophy 2, autosomal dominant	VAR_064972	p.Leu454Pro
									P02545	LMNA_HUMAN	muscular dystrophy congenital lmna-related	VAR_063593	p.Arg455Pro
									P02545	LMNA_HUMAN	emery-dreifuss muscular dystrophy 2, autosomal dominant	VAR_039781	p.Asn456Ile
									P02545	LMNA_HUMAN	emery-dreifuss muscular dystrophy 2, autosomal dominant	VAR_039782	p.Asn456Lys
									P02545	LMNA_HUMAN	muscular dystrophy congenital lmna-related	VAR_063594	p.Asn456Asp
									P02545	LMNA_HUMAN	cardiomyopathy, dilated 1a	VAR_067257	p.Leu92Phe
									P02545	LMNA_HUMAN	cardiomyopathy, dilated 1a	VAR_039759	p.Lys97Glu
									P02792	FRIL_HUMAN	neurodegeneration with brain iron accumulation 3	VAR_026633	p.Ala96Thr
									P03372	ESR1_HUMAN	breast cancer	VAR_033029	p.Met264Ile
									P04080	CYTB_HUMAN	epilepsy, progressive myoclonic 1	VAR_002206	p.Gly4Arg
									P04150	GCR_HUMAN	glucocorticoid resistance	VAR_013472	p.Arg477His
									P04264	K2C1_HUMAN	epidermolytic hyperkeratosis	VAR_003857	p.Ser193Pro
									P04424	ARLY_HUMAN	argininosuccinic aciduria	VAR_000679	p.Gln286Arg
									P04637	P53_HUMAN	sporadic cancer	VAR_044685	p.Phe113Ile
									P04637	P53_HUMAN	sporadic cancer	VAR_045788	p.Phe113Gly
									P04637	P53_HUMAN	sporadic cancers	VAR_005863	p.Phe113Cys
									P04637	P53_HUMAN	sporadic cancers	VAR_033033	p.Phe113Val
									P04637	P53_HUMAN	sporadic cancers	VAR_044686	p.Phe113Leu
									P04637	P53_HUMAN	sporadic cancers	VAR_044687	p.Phe113Ser
									P04637	P53_HUMAN	sporadic cancers	VAR_044688	p.His115Tyr
									P04637	P53_HUMAN	sporadic cancer	VAR_044690	p.Ser116Phe
									P04637	P53_HUMAN	sporadic cancer	VAR_044691	p.Ser116Pro
									P04637	P53_HUMAN	sporadic cancers	VAR_044689	p.Ser116Cys
									P04637	P53_HUMAN	sporadic cancers	VAR_044692	p.Gly117Glu
									P04637	P53_HUMAN	sporadic cancers	VAR_044693	p.Gly117Arg
									P04637	P53_HUMAN	sporadic cancer	VAR_044694	p.Thr118Ala
									P04637	P53_HUMAN	sporadic cancer	VAR_044696	p.Thr118Arg
									P04637	P53_HUMAN	sporadic cancers	VAR_044695	p.Thr118Ile
									P04637	P53_HUMAN	sporadic cancer	VAR_044697	p.Ala119Asp
									P04637	P53_HUMAN	sporadic cancer	VAR_044698	p.Ala119Thr
									P04637	P53_HUMAN	sporadic cancer	VAR_044701	p.Lys120Gln
									P04637	P53_HUMAN	sporadic cancers	VAR_044699	p.Lys120Glu
									P04637	P53_HUMAN	sporadic cancers	VAR_044700	p.Lys120Met
									P04637	P53_HUMAN	sporadic cancers	VAR_044702	p.Lys120Arg
									P04637	P53_HUMAN	sporadic cancers	VAR_044703	p.Ser121Phe
									P04637	P53_HUMAN	sporadic cancer	VAR_044704	p.Val122Leu
									P04637	P53_HUMAN	sporadic cancer	VAR_044705	p.Thr123Ile
									P04637	P53_HUMAN	sporadic cancer	VAR_044706	p.Thr123Asn
									P04637	P53_HUMAN	sporadic cancer	VAR_044707	p.Cys124Gly
									P04637	P53_HUMAN	sporadic cancer	VAR_044710	p.Cys124Trp
									P04637	P53_HUMAN	sporadic cancer	VAR_044711	p.Cys124Tyr
									P04637	P53_HUMAN	sporadic cancers	VAR_044708	p.Cys124Arg
									P04637	P53_HUMAN	sporadic cancers	VAR_044709	p.Cys124Ser
									P04637	P53_HUMAN	sporadic cancer	VAR_044712	p.Thr125Ala
									P04637	P53_HUMAN	sporadic cancer	VAR_044714	p.Thr125Pro
									P04637	P53_HUMAN	sporadic cancers	VAR_005864	p.Thr125Met
									P04637	P53_HUMAN	sporadic cancers	VAR_044713	p.Thr125Lys
									P04637	P53_HUMAN	sporadic cancers	VAR_044715	p.Thr125Arg
									P04637	P53_HUMAN	sporadic cancer	VAR_044717	p.Tyr126Phe
									P04637	P53_HUMAN	sporadic cancer	VAR_045789	p.Tyr126Gly
									P04637	P53_HUMAN	sporadic cancers	VAR_005865	p.Tyr126Asp
									P04637	P53_HUMAN	sporadic cancers	VAR_005866	p.Tyr126Asn
									P04637	P53_HUMAN	sporadic cancers	VAR_044718	p.Tyr126His
									P04637	P53_HUMAN	sporadic cancers	VAR_044719	p.Tyr126Ser
									P04637	P53_HUMAN	sporadic cancer	VAR_044720	p.Ser127Cys
									P04637	P53_HUMAN	sporadic cancers	VAR_005867	p.Ser127Phe
									P04637	P53_HUMAN	sporadic cancers	VAR_044721	p.Ser127Pro
									P04637	P53_HUMAN	sporadic cancers	VAR_044722	p.Ser127Thr
									P04637	P53_HUMAN	sporadic cancers	VAR_044723	p.Ser127Tyr
									P04637	P53_HUMAN	sporadic cancers	VAR_005903	p.Val157Asp
									P04637	P53_HUMAN	sporadic cancers	VAR_005904	p.Val157Phe
									P04637	P53_HUMAN	sporadic cancers	VAR_012977	p.Val157Ile
									P04637	P53_HUMAN	sporadic cancers	VAR_044844	p.Val157Ala
									P04637	P53_HUMAN	sporadic cancers	VAR_044845	p.Val157Gly
									P04637	P53_HUMAN	sporadic cancers	VAR_044846	p.Val157Leu
									P04637	P53_HUMAN	li-fraumeni syndrome	VAR_005906	p.Arg158Gly
									P04637	P53_HUMAN	li-fraumeni syndrome	VAR_005907	p.Arg158His
									P04637	P53_HUMAN	sporadic cancer	VAR_044849	p.Arg158Gln
									P04637	P53_HUMAN	sporadic cancer	VAR_045797	p.Arg158Phe
									P04637	P53_HUMAN	sporadic cancer	VAR_045798	p.Arg158Tyr
									P04637	P53_HUMAN	sporadic cancers	VAR_005905	p.Arg158Cys
									P04637	P53_HUMAN	sporadic cancers	VAR_044847	p.Arg158Leu
									P04637	P53_HUMAN	sporadic cancers	VAR_044848	p.Arg158Pro
									P04637	P53_HUMAN	sporadic cancers	VAR_044850	p.Arg158Ser
									P04637	P53_HUMAN	sporadic cancer	VAR_045799	p.Ala159Phe
									P04637	P53_HUMAN	sporadic cancers	VAR_044851	p.Ala159Asp
									P04637	P53_HUMAN	sporadic cancers	VAR_044852	p.Ala159Gly
									P04637	P53_HUMAN	sporadic cancers	VAR_044853	p.Ala159Pro
									P04637	P53_HUMAN	sporadic cancers	VAR_044854	p.Ala159Ser
									P04637	P53_HUMAN	sporadic cancers	VAR_044855	p.Ala159Thr
									P04637	P53_HUMAN	sporadic cancers	VAR_044856	p.Ala159Val
									P04637	P53_HUMAN	sporadic cancer	VAR_044858	p.Met160Thr
									P04637	P53_HUMAN	sporadic cancers	VAR_005908	p.Met160Ile
									P04637	P53_HUMAN	sporadic cancers	VAR_044857	p.Met160Lys
									P04637	P53_HUMAN	sporadic cancers	VAR_044859	p.Met160Val
									P04637	P53_HUMAN	sporadic cancer	VAR_045800	p.Ala161Phe
									P04637	P53_HUMAN	sporadic cancers	VAR_005909	p.Ala161Ser
									P04637	P53_HUMAN	sporadic cancers	VAR_044860	p.Ala161Asp
									P04637	P53_HUMAN	sporadic cancers	VAR_044861	p.Ala161Gly
									P04637	P53_HUMAN	sporadic cancers	VAR_044862	p.Ala161Pro
									P04637	P53_HUMAN	sporadic cancers	VAR_044863	p.Ala161Thr
									P04637	P53_HUMAN	sporadic cancers	VAR_044864	p.Ala161Val
									P04637	P53_HUMAN	sporadic cancers	VAR_005910	p.Ile162Ser
									P04637	P53_HUMAN	sporadic cancers	VAR_005911	p.Ile162Val
									P04637	P53_HUMAN	sporadic cancers	VAR_044865	p.Ile162Phe
									P04637	P53_HUMAN	sporadic cancers	VAR_044866	p.Ile162Met
									P04637	P53_HUMAN	sporadic cancers	VAR_044868	p.Ile162Thr
									P04637	P53_HUMAN	li-fraumeni syndrome	VAR_033035	p.Tyr163Cys
									P04637	P53_HUMAN	sporadic cancer	VAR_044870	p.Tyr163Phe
									P04637	P53_HUMAN	sporadic cancers	VAR_005912	p.Tyr163His
									P04637	P53_HUMAN	sporadic cancers	VAR_044869	p.Tyr163Asp
									P04637	P53_HUMAN	sporadic cancers	VAR_044871	p.Tyr163Asn
									P04637	P53_HUMAN	sporadic cancers	VAR_044872	p.Tyr163Ser
									P04637	P53_HUMAN	sporadic cancers	VAR_005913	p.Lys164Asn
									P04637	P53_HUMAN	sporadic cancers	VAR_005914	p.Lys164Gln
									P04637	P53_HUMAN	sporadic cancers	VAR_044873	p.Lys164Glu
									P04637	P53_HUMAN	sporadic cancers	VAR_044874	p.Lys164Met
									P04637	P53_HUMAN	sporadic cancers	VAR_044875	p.Lys164Arg
									P04637	P53_HUMAN	sporadic cancers	VAR_044876	p.Lys164Thr
									P04637	P53_HUMAN	sporadic cancer	VAR_044878	p.Gln165His
									P04637	P53_HUMAN	sporadic cancers	VAR_005915	p.Gln165Leu
									P04637	P53_HUMAN	sporadic cancers	VAR_005916	p.Gln165Arg
									P04637	P53_HUMAN	sporadic cancers	VAR_044877	p.Gln165Glu
									P04637	P53_HUMAN	sporadic cancers	VAR_044879	p.Gln165Pro
									P04637	P53_HUMAN	sporadic cancer	VAR_044881	p.Ser166Gly
									P04637	P53_HUMAN	sporadic cancers	VAR_005917	p.Ser166Leu
									P04637	P53_HUMAN	sporadic cancers	VAR_044880	p.Ser166Ala
									P04637	P53_HUMAN	sporadic cancers	VAR_044882	p.Ser166Pro
									P04637	P53_HUMAN	sporadic cancers	VAR_044883	p.Ser166Thr
									P04637	P53_HUMAN	li-fraumeni syndrome	VAR_044885	p.Gln167Lys
									P04637	P53_HUMAN	sporadic cancers	VAR_044884	p.Gln167His
									P04637	P53_HUMAN	sporadic cancers	VAR_044886	p.Gln167Leu
									P04637	P53_HUMAN	sporadic cancers	VAR_044887	p.Gln167Arg
									P04637	P53_HUMAN	sporadic cancer	VAR_045801	p.His168Val
									P04637	P53_HUMAN	sporadic cancers	VAR_005918	p.His168Arg
									P04637	P53_HUMAN	sporadic cancers	VAR_044888	p.His168Asp
									P04637	P53_HUMAN	sporadic cancers	VAR_044889	p.His168Leu
									P04637	P53_HUMAN	sporadic cancers	VAR_044890	p.His168Asn
									P04637	P53_HUMAN	sporadic cancers	VAR_044891	p.His168Pro
									P04637	P53_HUMAN	sporadic cancers	VAR_044892	p.His168Gln
									P04637	P53_HUMAN	sporadic cancers	VAR_044893	p.His168Tyr
									P04637	P53_HUMAN	sporadic cancers	VAR_005919	p.Met169Ile
									P04637	P53_HUMAN	sporadic cancers	VAR_005920	p.Met169Thr
									P04637	P53_HUMAN	sporadic cancers	VAR_044894	p.Met169Lys
									P04637	P53_HUMAN	sporadic cancers	VAR_044895	p.Met169Val
									P04637	P53_HUMAN	sporadic cancer	VAR_044897	p.Thr170Lys
									P04637	P53_HUMAN	sporadic cancer	VAR_044898	p.Thr170Pro
									P04637	P53_HUMAN	sporadic cancers	VAR_005921	p.Thr170Met
									P04637	P53_HUMAN	sporadic cancers	VAR_005922	p.Thr170Ser
									P04637	P53_HUMAN	sporadic cancers	VAR_044896	p.Thr170Ala
									P04637	P53_HUMAN	sporadic cancer	VAR_044899	p.Glu171Ala
									P04637	P53_HUMAN	sporadic cancer	VAR_044903	p.Glu171Gln
									P04637	P53_HUMAN	sporadic cancers	VAR_044900	p.Glu171Asp
									P04637	P53_HUMAN	sporadic cancers	VAR_044901	p.Glu171Gly
									P04637	P53_HUMAN	sporadic cancers	VAR_044902	p.Glu171Lys
									P04637	P53_HUMAN	sporadic cancers	VAR_044904	p.Glu171Val
									P04637	P53_HUMAN	li-fraumeni syndrome	VAR_006024	p.Glu285Gln
									P04637	P53_HUMAN	sporadic cancer	VAR_045392	p.Glu285Ala
									P04637	P53_HUMAN	sporadic cancers	VAR_006023	p.Glu285Lys
									P04637	P53_HUMAN	sporadic cancers	VAR_006025	p.Glu285Val
									P04637	P53_HUMAN	sporadic cancers	VAR_045393	p.Glu285Asp
									P04637	P53_HUMAN	sporadic cancers	VAR_045394	p.Glu285Gly
									P04637	P53_HUMAN	li-fraumeni syndrome	VAR_006026	p.Glu286Ala
									P04637	P53_HUMAN	sporadic cancer	VAR_045871	p.Glu286Leu
									P04637	P53_HUMAN	sporadic cancers	VAR_006027	p.Glu286Asp
									P04637	P53_HUMAN	sporadic cancers	VAR_006028	p.Glu286Gly
									P04637	P53_HUMAN	sporadic cancers	VAR_006029	p.Glu286Lys
									P04637	P53_HUMAN	sporadic cancers	VAR_006030	p.Glu286Gln
									P04637	P53_HUMAN	sporadic cancers	VAR_045395	p.Glu286Val
									P04637	P53_HUMAN	sporadic cancer	VAR_047204	p.Glu287Ala
									P04637	P53_HUMAN	sporadic cancers	VAR_045396	p.Glu287Asp
									P04637	P53_HUMAN	sporadic cancers	VAR_045397	p.Glu287Gly
									P04637	P53_HUMAN	sporadic cancers	VAR_045398	p.Glu287Lys
									P04637	P53_HUMAN	sporadic cancers	VAR_045399	p.Glu287Val
									P04637	P53_HUMAN	sporadic cancer	VAR_045400	p.Asn288Asp
									P04637	P53_HUMAN	sporadic cancers	VAR_045401	p.Asn288Lys
									P04637	P53_HUMAN	sporadic cancers	VAR_045402	p.Asn288Ser
									P04637	P53_HUMAN	sporadic cancers	VAR_045403	p.Asn288Thr
									P04637	P53_HUMAN	sporadic cancers	VAR_045404	p.Asn288Tyr
									P04637	P53_HUMAN	sporadic cancer	VAR_045408	p.Leu289Arg
									P04637	P53_HUMAN	sporadic cancers	VAR_045405	p.Leu289Phe
									P04637	P53_HUMAN	sporadic cancers	VAR_045406	p.Leu289His
									P04637	P53_HUMAN	sporadic cancers	VAR_045407	p.Leu289Pro
									P04637	P53_HUMAN	sporadic cancers	VAR_045409	p.Leu289Val
									P04637	P53_HUMAN	li-fraumeni syndrome	VAR_045411	p.Arg290His
									P04637	P53_HUMAN	li-fraumeni syndrome	VAR_045412	p.Arg290Leu
									P04637	P53_HUMAN	sporadic cancers	VAR_045410	p.Arg290Cys
									P04637	P53_HUMAN	sporadic cancers	VAR_045413	p.Lys291Glu
									P04637	P53_HUMAN	sporadic cancers	VAR_045414	p.Lys291Met
									P04637	P53_HUMAN	sporadic cancers	VAR_045415	p.Lys291Asn
									P04637	P53_HUMAN	sporadic cancers	VAR_045416	p.Lys291Arg
									P04637	P53_HUMAN	sporadic cancers	VAR_045417	p.Lys291Thr
									P04637	P53_HUMAN	sporadic cancers	VAR_047205	p.Lys291Gln
									P04637	P53_HUMAN	li-fraumeni syndrome	VAR_015819	p.Lys292Ile
									P04637	P53_HUMAN	sporadic cancer	VAR_045420	p.Lys292Gln
									P04637	P53_HUMAN	sporadic cancer	VAR_045872	p.Lys292Gly
									P04637	P53_HUMAN	sporadic cancers	VAR_045418	p.Lys292Glu
									P04637	P53_HUMAN	sporadic cancers	VAR_045419	p.Lys292Asn
									P04637	P53_HUMAN	sporadic cancers	VAR_045421	p.Lys292Arg
									P04637	P53_HUMAN	sporadic cancers	VAR_045422	p.Lys292Thr
									P04637	P53_HUMAN	sporadic cancer	VAR_045423	p.Gly293Ala
									P04637	P53_HUMAN	sporadic cancers	VAR_045424	p.Gly293Arg
									P04637	P53_HUMAN	sporadic cancers	VAR_045425	p.Gly293Val
									P04637	P53_HUMAN	sporadic cancer	VAR_045427	p.Glu294Ala
									P04637	P53_HUMAN	sporadic cancers	VAR_045428	p.Glu294Asp
									P04637	P53_HUMAN	sporadic cancers	VAR_045429	p.Glu294Gly
									P04637	P53_HUMAN	sporadic cancers	VAR_045430	p.Glu294Gln
									P04637	P53_HUMAN	sporadic cancers	VAR_045431	p.Glu294Val
									P04637	P53_HUMAN	sporadic cancers	VAR_047206	p.Glu294Lys
									P04637	P53_HUMAN	sporadic cancer	VAR_045432	p.Pro295His
									P04637	P53_HUMAN	sporadic cancer	VAR_045434	p.Pro295Arg
									P04637	P53_HUMAN	sporadic cancers	VAR_045433	p.Pro295Leu
									P04637	P53_HUMAN	sporadic cancers	VAR_045435	p.Pro295Ser
									P04637	P53_HUMAN	sporadic cancer	VAR_006031	p.His296Pro
									P04637	P53_HUMAN	sporadic cancer	VAR_045439	p.His296Arg
									P04637	P53_HUMAN	sporadic cancers	VAR_045436	p.His296Asp
									P04637	P53_HUMAN	sporadic cancers	VAR_045437	p.His296Asn
									P04637	P53_HUMAN	sporadic cancers	VAR_045438	p.His296Gln
									P04637	P53_HUMAN	sporadic cancers	VAR_045440	p.His296Tyr
									P04637	P53_HUMAN	sporadic cancers	VAR_045873	p.His296Cys
									P04637	P53_HUMAN	sporadic cancers	VAR_047207	p.His296Leu
									P04637	P53_HUMAN	sporadic cancer	VAR_045441	p.His297Asp
									P04637	P53_HUMAN	sporadic cancer	VAR_045442	p.His297Asn
									P04637	P53_HUMAN	sporadic cancers	VAR_045443	p.His297Pro
									P04637	P53_HUMAN	sporadic cancers	VAR_045444	p.His297Arg
									P04637	P53_HUMAN	sporadic cancers	VAR_045445	p.His297Tyr
									P04637	P53_HUMAN	sporadic cancer	VAR_045446	p.Glu298Ala
									P04637	P53_HUMAN	sporadic cancers	VAR_045447	p.Glu298Asp
									P04637	P53_HUMAN	sporadic cancers	VAR_045448	p.Glu298Lys
									P04637	P53_HUMAN	sporadic cancers	VAR_045449	p.Glu298Gln
									P04637	P53_HUMAN	sporadic cancers	VAR_045450	p.Glu298Val
									P04637	P53_HUMAN	sporadic cancer	VAR_045453	p.Leu299Arg
									P04637	P53_HUMAN	sporadic cancer	VAR_045454	p.Leu299Val
									P04637	P53_HUMAN	sporadic cancers	VAR_045451	p.Leu299Pro
									P04637	P53_HUMAN	sporadic cancers	VAR_045452	p.Leu299Gln
									P04637	P53_HUMAN	sporadic cancer	VAR_006032	p.Pro300Arg
									P04637	P53_HUMAN	sporadic cancers	VAR_045455	p.Pro300Ala
									P04637	P53_HUMAN	sporadic cancers	VAR_045456	p.Pro300Leu
									P04637	P53_HUMAN	sporadic cancers	VAR_045457	p.Pro300Ser
									P04637	P53_HUMAN	sporadic cancer	VAR_047208	p.Pro301Thr
									P04637	P53_HUMAN	sporadic cancers	VAR_006033	p.Pro301Leu
									P04637	P53_HUMAN	sporadic cancers	VAR_045458	p.Pro301Ala
									P04637	P53_HUMAN	sporadic cancers	VAR_045459	p.Pro301Gln
									P04637	P53_HUMAN	sporadic cancers	VAR_045460	p.Pro301Ser
									P04637	P53_HUMAN	sporadic cancer	VAR_006035	p.Gly302Val
									P04637	P53_HUMAN	sporadic cancer	VAR_045461	p.Gly302Ala
									P04637	P53_HUMAN	sporadic cancer	VAR_045462	p.Gly302Arg
									P04637	P53_HUMAN	sporadic cancers	VAR_006034	p.Gly302Glu
									P04637	P53_HUMAN	sporadic cancers	VAR_045463	p.Ser303Cys
									P04637	P53_HUMAN	sporadic cancers	VAR_045464	p.Ser303Ile
									P04637	P53_HUMAN	sporadic cancers	VAR_045465	p.Ser303Asn
									P04637	P53_HUMAN	sporadic cancers	VAR_045466	p.Ser303Thr
									P04637	P53_HUMAN	sporadic cancer	VAR_045469	p.Thr304Asn
									P04637	P53_HUMAN	sporadic cancer	VAR_047209	p.Thr304Ser
									P04637	P53_HUMAN	sporadic cancers	VAR_045467	p.Thr304Ala
									P04637	P53_HUMAN	sporadic cancers	VAR_045468	p.Thr304Ile
									P04637	P53_HUMAN	sporadic cancer	VAR_045470	p.Lys305Glu
									P04637	P53_HUMAN	sporadic cancer	VAR_045474	p.Lys305Thr
									P04637	P53_HUMAN	sporadic cancers	VAR_045472	p.Lys305Asn
									P04637	P53_HUMAN	sporadic cancers	VAR_045473	p.Lys305Arg
									P04637	P53_HUMAN	li-fraumeni syndrome	VAR_045475	p.Arg306Pro
									P04637	P53_HUMAN	sporadic cancers	VAR_006036	p.Arg306Gln
									P04637	P53_HUMAN	sporadic cancer	VAR_045476	p.Ala307Pro
									P04637	P53_HUMAN	sporadic cancers	VAR_006037	p.Ala307Thr
									P04637	P53_HUMAN	sporadic cancers	VAR_045477	p.Ala307Ser
									P04637	P53_HUMAN	sporadic cancer	VAR_045479	p.Leu308Val
									P04637	P53_HUMAN	sporadic cancers	VAR_045478	p.Leu308Met
									P04637	P53_HUMAN	li-fraumeni syndrome	VAR_006038	p.Pro309Ser
									P04637	P53_HUMAN	sporadic cancer	VAR_045480	p.Pro309Arg
									P04637	P53_HUMAN	sporadic cancer	VAR_045481	p.Asn310Ile
									P04637	P53_HUMAN	sporadic cancers	VAR_045482	p.Asn310Thr
									P04637	P53_HUMAN	sporadic cancer	VAR_045484	p.Asn311Lys
									P04637	P53_HUMAN	sporadic cancer	VAR_045485	p.Asn311Ser
									P04637	P53_HUMAN	sporadic cancers	VAR_045483	p.Asn311His
									P04637	P53_HUMAN	sporadic cancers	VAR_045486	p.Asn311Thr
									P04637	P53_HUMAN	sporadic cancers	VAR_045487	p.Thr312Ile
									P04637	P53_HUMAN	sporadic cancers	VAR_045488	p.Thr312Ser
									P04637	P53_HUMAN	sporadic cancer	VAR_045489	p.Ser313Cys
									P04637	P53_HUMAN	sporadic cancer	VAR_045490	p.Ser313Ile
									P04637	P53_HUMAN	sporadic cancer	VAR_045491	p.Ser313Asn
									P04637	P53_HUMAN	sporadic cancer	VAR_045492	p.Ser313Arg
									P04637	P53_HUMAN	sporadic cancer	VAR_045493	p.Ser314Phe
									P04637	P53_HUMAN	sporadic cancer	VAR_045494	p.Ser315Cys
									P04637	P53_HUMAN	sporadic cancer	VAR_045495	p.Ser315Phe
									P04637	P53_HUMAN	sporadic cancer	VAR_045496	p.Ser315Pro
									P04637	P53_HUMAN	sporadic cancer	VAR_045497	p.Pro316Leu
									P04637	P53_HUMAN	sporadic cancer	VAR_045498	p.Pro316Thr
									P04637	P53_HUMAN	sporadic cancer	VAR_045501	p.Gln317Pro
									P04637	P53_HUMAN	sporadic cancer	VAR_047210	p.Gln317Leu
									P04637	P53_HUMAN	sporadic cancers	VAR_045500	p.Gln317Lys
									P04637	P53_HUMAN	sporadic cancers	VAR_045502	p.Gln317Arg
									P04637	P53_HUMAN	sporadic cancers	VAR_045503	p.Pro318Leu
									P04637	P53_HUMAN	sporadic cancer	VAR_045505	p.Lys319Asn
									P04637	P53_HUMAN	sporadic cancer	VAR_045506	p.Lys319Arg
									P04637	P53_HUMAN	sporadic cancers	VAR_045504	p.Lys319Glu
									P04637	P53_HUMAN	sporadic cancers	VAR_045507	p.Lys320Asn
									P04637	P53_HUMAN	kidney cancer	VAR_045508	p.Lys321Glu
									P04637	P53_HUMAN	sporadic cancer	VAR_045509	p.Lys321Arg
									P04637	P53_HUMAN	sporadic cancers	VAR_045510	p.Pro322Leu
									P04637	P53_HUMAN	sporadic cancers	VAR_045511	p.Pro322Arg
									P04637	P53_HUMAN	sporadic cancer	VAR_045512	p.Leu323Met
									P04637	P53_HUMAN	sporadic cancer	VAR_045513	p.Leu323Pro
									P04637	P53_HUMAN	sporadic cancer	VAR_045514	p.Leu323Arg
									P04637	P53_HUMAN	sporadic cancer	VAR_045874	p.Leu323Gly
									P04637	P53_HUMAN	sporadic cancer	VAR_047211	p.Leu323Val
									P04637	P53_HUMAN	sporadic cancer	VAR_045516	p.Asp324Tyr
									P04637	P53_HUMAN	sporadic cancer	VAR_045875	p.Asp324Ser
									P04637	P53_HUMAN	sporadic cancers	VAR_045515	p.Asp324Glu
									P04637	P53_HUMAN	li-fraumeni syndrome	VAR_006039	p.Gly325Val
									P04637	P53_HUMAN	sporadic cancer	VAR_045517	p.Gly325Ala
									P04637	P53_HUMAN	sporadic cancers	VAR_045518	p.Gly325Glu
									P04637	P53_HUMAN	sporadic cancer	VAR_045519	p.Glu326Gly
									P04637	P53_HUMAN	sporadic cancer	VAR_045520	p.Tyr327His
									P04637	P53_HUMAN	sporadic cancer	VAR_045521	p.Tyr327Ser
									P04637	P53_HUMAN	sporadic cancer	VAR_045522	p.Phe328Leu
									P04637	P53_HUMAN	sporadic cancer	VAR_045524	p.Phe328Val
									P04637	P53_HUMAN	sporadic cancers	VAR_045523	p.Phe328Ser
									P04637	P53_HUMAN	sporadic cancer	VAR_045564	p.Arg363Lys
									P04637	P53_HUMAN	sporadic cancer	VAR_045565	p.Ala364Pro
									P04637	P53_HUMAN	sporadic cancer	VAR_045566	p.Ala364Thr
									P04637	P53_HUMAN	sporadic cancer	VAR_045567	p.Ala364Val
									P04637	P53_HUMAN	sporadic cancer	VAR_047215	p.His365Arg
									P04637	P53_HUMAN	sporadic cancer	VAR_045569	p.Lys370Gln
									P04637	P53_HUMAN	sporadic cancer	VAR_045570	p.Ser376Ala
									P04637	P53_HUMAN	sporadic cancer	VAR_045571	p.Ser376Thr
									P04637	P53_HUMAN	sporadic cancers	VAR_045572	p.Arg379His
									P04637	P53_HUMAN	sporadic cancer	VAR_045573	p.Phe385Leu
									P04637	P53_HUMAN	sporadic cancer	VAR_045574	p.Gly389Trp
									P04637	P53_HUMAN	sporadic cancer	VAR_045575	p.Ser392Leu
									P04792	HSPB1_HUMAN	neuronopathy, distal hereditary motor, 2b	VAR_018506	p.Arg127Trp
									P05062	ALDOB_HUMAN	fructose intolerance	VAR_000552	p.Trp148Arg
									P05062	ALDOB_HUMAN	fructose intolerance	VAR_000552	p.Trp148Arg
									P05062	ALDOB_HUMAN	hereditary fructose intolerance	VAR_000553	p.Ala150Pro
									P05165	PCCA_HUMAN	propionic acidemia type i	VAR_009099	p.Trp559Leu
									P05166	PCCB_HUMAN	propionic acidemia type ii	VAR_000281	p.Leu519Pro
									P05783	K1C18_HUMAN	cirrhosis	VAR_003852	p.His128Leu
									P06213	INSR_HUMAN	leprechaunism	VAR_015925	p.Arg1119Trp
									P06400	RB_HUMAN	childhood cancer retinoblastoma	VAR_005578	p.His549Tyr
									P06400	RB_HUMAN	childhood cancer retinoblastoma	VAR_005580	p.Ala635Pro
									P06400	RB_HUMAN	childhood cancer retinoblastoma	VAR_005581	p.Val654Glu
									P06400	RB_HUMAN	childhood cancer retinoblastoma	VAR_010050	p.Leu657Pro
									P06744	G6PI_HUMAN	hemolytic anemia, non-spherocytic	VAR_002516	p.Thr5Ile
									P06753	TPM3_HUMAN	cap myopathy 1	VAR_070067	p.Arg168Cys
									P06753	TPM3_HUMAN	cap myopathy 1	VAR_070069	p.Arg168His
									P06753	TPM3_HUMAN	myopathy, congenital, with fiber-type disproportion	VAR_070067	p.Arg168Cys
									P06753	TPM3_HUMAN	myopathy, congenital, with fiber-type disproportion	VAR_070068	p.Arg168Gly
									P06753	TPM3_HUMAN	nemaline myopathy 1	VAR_070069	p.Arg168His
									P06753	TPM3_HUMAN	nemaline myopathy 1	VAR_013460	p.Met9Arg
									P07737	PROF1_HUMAN	amyotrophic lateral sclerosis 18	VAR_068926	p.Met114Thr
									P07741	APT_HUMAN	adenine phosphoribosyltransferase deficiency	VAR_006748	p.Leu110Pro
									P07951	TPM2_HUMAN	nemaline myopathy 4	VAR_013468	p.Glu117Ala
									P08123	CO1A2_HUMAN	osteogenesis imperfecta 4	VAR_063343	p.Gly193Ser
									P08123	CO1A2_HUMAN	osteogenesis imperfecta 4	VAR_063344	p.Gly202Arg
									P08397	HEM3_HUMAN	acute intermittent porphyria	VAR_025558	p.Met18Ile
									P08397	HEM3_HUMAN	acute intermittent porphyria	VAR_003638	p.Arg22Cys
									P08397	HEM3_HUMAN	acute intermittent porphyria	VAR_011001	p.Gly24Ser
									P08397	HEM3_HUMAN	acute intermittent porphyria	VAR_025562	p.Glu80Gly
									P08397	HEM3_HUMAN	acute intermittent porphyria	VAR_025563	p.Leu81Pro
									P08397	HEM3_HUMAN	acute intermittent porphyria	VAR_011009	p.Leu85Arg
									P08397	HEM3_HUMAN	acute intermittent porphyria	VAR_025564	p.Glu86Val
									P08397	HEM3_HUMAN	acute intermittent porphyria	VAR_011010	p.Val90Gly
									P08397	HEM3_HUMAN	acute intermittent porphyria	VAR_025565	p.Leu92Pro
									P08397	HEM3_HUMAN	acute intermittent porphyria	VAR_003643	p.Val93Phe
									P08559	ODPA_HUMAN	pyruvate dehydrogenase e1-alpha deficiency	VAR_021056	p.Asp315Asn
									P08559	ODPA_HUMAN	pyruvate dehydrogenase e1-alpha deficiency	VAR_004949	p.Arg72Cys
									P10275	ANDR_HUMAN	prostate cancer	VAR_009757	p.Arg629Gln
									P10275	ANDR_HUMAN	prostate cancer	VAR_009758	p.Lys630Thr
									P10809	CH60_HUMAN	leukodystrophy, hypomyelinating, 4	VAR_054785	p.Asp29Gly
									P11217	PYGM_HUMAN	glycogen storage disease 5	VAR_003433	p.Lys543Thr
									P11310	ACADM_HUMAN	acyl-coa dehydrogenase medium-chain deficiency	VAR_015957	p.Arg206Leu
									P11310	ACADM_HUMAN	acyl-coa dehydrogenase medium-chain deficiency	VAR_013700	p.Arg281Thr
									P11362	FGFR1_HUMAN	hypogonadotropic hypogonadism 2 with or without anosmia	VAR_017887	p.Ala167Ser
									P11362	FGFR1_HUMAN	hypogonadotropic hypogonadism 2 with or without anosmia	VAR_030974	p.Cys178Ser
									P11413	G6PD_HUMAN	anemia, non-spherocytic hemolytic	VAR_002498	p.Arg387Cys
									P11413	G6PD_HUMAN	anemia, non-spherocytic hemolytic	VAR_002504	p.Gly410Asp
									P11413	G6PD_HUMAN	anemia, non-spherocytic hemolytic	VAR_002506	p.Arg439Pro
									P12235	ADT1_HUMAN	progressive external ophthalmoplegia with mitochondrial dna deletions, autosomal dominant, 2	VAR_038814	p.Ala90Asp
									P12235	ADT1_HUMAN	progressive external ophthalmoplegia with mitochondrial dna deletions, autosomal dominant, 2	VAR_022459	p.Leu98Pro
									P12883	MYH7_HUMAN	cardiomyopathy, familial hypertrophic 1	VAR_019871	p.Ala1777Thr
									P13645	K1C10_HUMAN	epidermolytic hyperkeratosis	VAR_003827	p.Arg156His
									P13645	K1C10_HUMAN	epidermolytic hyperkeratosis	VAR_003828	p.Arg156Cys
									P13645	K1C10_HUMAN	epidermolytic hyperkeratosis	VAR_003829	p.Arg156Pro
									P13645	K1C10_HUMAN	epidermolytic hyperkeratosis	VAR_003830	p.Arg156Ser
									P13645	K1C10_HUMAN	epidermolytic hyperkeratosis	VAR_003831	p.Tyr160Asp
									P13645	K1C10_HUMAN	epidermolytic hyperkeratosis	VAR_010508	p.Tyr160Asn
									P13645	K1C10_HUMAN	epidermolytic hyperkeratosis	VAR_010509	p.Tyr160Ser
									P13645	K1C10_HUMAN	epidermolytic hyperkeratosis	VAR_003832	p.Leu161Ser
									P13647	K2C5_HUMAN	epidermolysis bullosa simplex, dowling-meara type	VAR_010458	p.Phe179Ser
									P13647	K2C5_HUMAN	epidermolysis bullosa simplex, dowling-meara type	VAR_010459	p.Ser181Pro
									P13647	K2C5_HUMAN	epidermolysis bullosa simplex, koebner type	VAR_013829	p.Val186Leu
									P13647	K2C5_HUMAN	epidermolysis bullosa simplex, koebner type	VAR_031642	p.Val186Met
									P13647	K2C5_HUMAN	epidermolysis bullosa simplex, weber-cockayne type	VAR_027724	p.Glu190Lys
									P13647	K2C5_HUMAN	epidermolysis bullosa simplex, koebner type	VAR_031643	p.Gln191Pro
									P14868	SYDC_HUMAN	hypomyelination with brainstem and spinal cord involvement and leg spasticity	VAR_070040	p.Asp367Tyr
									P15259	PGAM2_HUMAN	glycogen storage disease 10	VAR_013103	p.Gly97Asp
									P15336	ATF2_HUMAN	breast cancer	VAR_035999	p.Asp352His
									P16401	H15_HUMAN	colorectal cancer	VAR_036204	p.Gly86Asp
									P16930	FAAA_HUMAN	tyrosinemia 1	VAR_005214	p.Trp234Gly
									P17661	DESM_HUMAN	myopathy, myofibrillar, 1	VAR_069191	p.Asn116Ser
									P17661	DESM_HUMAN	myopathy, myofibrillar, 1	VAR_042452	p.Glu245Asp
									P17987	TCPA_HUMAN	breast cancer	VAR_036258	p.Val7Leu
									P19429	TNNI3_HUMAN	cardiomyopathy, dilated 2a	VAR_043989	p.Ala2Val
									P22033	MUTA_HUMAN	methylmalonic aciduria type mut	VAR_022406	p.Leu328Phe
									P22033	MUTA_HUMAN	methylmalonic aciduria type mut	VAR_023475	p.Leu328Pro
									P23771	GATA3_HUMAN	breast cancer	VAR_033025	p.Arg366Leu
									P23786	CPT2_HUMAN	carnitine palmitoyltransferase 2 deficiency late-onset	VAR_007970	p.Arg503Cys
									P23786	CPT2_HUMAN	encephalopathy, acute, infection-induced, 4	VAR_066567	p.Pro504Leu
									P23786	CPT2_HUMAN	carnitine palmitoyltransferase 2 deficiency late-onset	VAR_007971	p.Gly549Asp
									P23786	CPT2_HUMAN	carnitine palmitoyltransferase 2 deficiency late-onset	VAR_020543	p.Gln550Arg
									P24752	THIL_HUMAN	3-ketothiolase deficiency	VAR_007501	p.Gly183Arg
									P25092	GUC2C_HUMAN	meconium ileus	VAR_068174	p.Asp387Gly
									P26440	IVD_HUMAN	isovaleric acidemia	VAR_015961	p.Asp69Asn
									P27635	RL10_HUMAN	autism, x-linked 5	VAR_027795	p.Leu206Met
									P27635	RL10_HUMAN	autism, x-linked 5	VAR_027796	p.His213Gln
									P29033	CXB2_HUMAN	deafness, autosomal recessive, 1a	VAR_002145	p.Ser113Arg
									P29033	CXB2_HUMAN	keratitis-ichthyosis-deafness syndrome	VAR_015453	p.Gly12Arg
									P29033	CXB2_HUMAN	keratitis-ichthyosis-deafness syndrome	VAR_015454	p.Ser17Phe
									P29033	CXB2_HUMAN	deafness, autosomal recessive, 1a	VAR_002144	p.Val95Met
									P30566	PUR8_HUMAN	adenylosuccinase deficiency	VAR_007973	p.Arg141Trp
									P30566	PUR8_HUMAN	adenylosuccinase deficiency	VAR_016930	p.Ala2Val
									P30566	PUR8_HUMAN	adenylosuccinase deficiency	VAR_017078	p.Ala3Val
									P30613	KPYR_HUMAN	pyruvate kinase deficiency of red cells	VAR_004045	p.Gly341Ala
									P30613	KPYR_HUMAN	pyruvate kinase deficiency of red cells	VAR_011454	p.Gly341Asp
									P30613	KPYR_HUMAN	pyruvate kinase deficiency of red cells	VAR_011455	p.Ile342Phe
									P30613	KPYR_HUMAN	pyruvate kinase deficiency of red cells	VAR_011456	p.Lys348Asn
									P30613	KPYR_HUMAN	pyruvate kinase deficiency of red cells	VAR_011477	p.Ala352Asp
									P31040	SDHA_HUMAN	leigh syndrome	VAR_002449	p.Arg554Trp
									P31327	CPSM_HUMAN	carbamoyl phosphate synthetase 1 deficiency	VAR_017565	p.Lys875Glu
									P31749	AKT1_HUMAN	breast cancer	VAR_055422	p.Glu17Lys
									P31749	AKT1_HUMAN	proteus syndrome	VAR_055422	p.Glu17Lys
									P35222	CTNB1_HUMAN	hepatocellular carcinoma	VAR_017612	p.Ser23Arg
									P35222	CTNB1_HUMAN	hepatocellular carcinoma	VAR_017631	p.Ser45Phe
									P35222	CTNB1_HUMAN	hepatocellular carcinoma	VAR_017632	p.Ser45Pro
									P35240	MERL_HUMAN	breast ductal carcinoma	VAR_000819	p.Ile273Phe
									P35579	MYH9_HUMAN	epstein syndrome	VAR_018315	p.Arg1400Trp
									P35579	MYH9_HUMAN	may-hegglin anomaly	VAR_018308	p.Ala95Thr
									P35579	MYH9_HUMAN	epstein syndrome	VAR_018309	p.Ser96Leu
									P35914	HMGCL_HUMAN	3-hydroxy-3-methylglutaryl-coa lyase deficiency	VAR_003744	p.Arg41Gln
									P35914	HMGCL_HUMAN	3-hydroxy-3-methylglutaryl-coa lyase deficiency	VAR_003745	p.Asp42Glu
									P35914	HMGCL_HUMAN	3-hydroxy-3-methylglutaryl-coa lyase deficiency	VAR_003746	p.Asp42Gly
									P35914	HMGCL_HUMAN	3-hydroxy-3-methylglutaryl-coa lyase deficiency	VAR_003747	p.Asp42His
									P35914	HMGCL_HUMAN	3-hydroxy-3-methylglutaryl-coa lyase deficiency	VAR_058441	p.Lys48Asn
									P39019	RS19_HUMAN	diamond-blackfan anemia 1	VAR_046145	p.Ala17Pro
									P39019	RS19_HUMAN	diamond-blackfan anemia 1	VAR_018439	p.Leu18Pro
									P39019	RS19_HUMAN	diamond-blackfan anemia 1	VAR_046146	p.Leu18Arg
									P39019	RS19_HUMAN	diamond-blackfan anemia 1	VAR_055438	p.Phe21Ser
									P39019	RS19_HUMAN	diamond-blackfan anemia 1	VAR_055442	p.Thr76Pro
									P40939	ECHA_HUMAN	trifunctional protein deficiency	VAR_021126	p.Ile305Asn
									P40939	ECHA_HUMAN	long-chain 3-hydroxyl-coa dehydrogenase deficiency	VAR_002273	p.Glu510Gln
									P40939	ECHA_HUMAN	maternal acute fatty liver of pregnancy	VAR_002273	p.Glu510Gln
									P43246	MSH2_HUMAN	hereditary non-polyposis colorectal cancer 1	VAR_043768	p.Thr552Pro
									P43246	MSH2_HUMAN	hereditary non-polyposis colorectal cancer 1	VAR_012942	p.Ser554Arg
									P43246	MSH2_HUMAN	hereditary non-polyposis colorectal cancer 1	VAR_004480	p.Glu562Val
									P43246	MSH2_HUMAN	hereditary non-polyposis colorectal cancer 1	VAR_043774	p.Gln629Arg
									P43246	MSH2_HUMAN	hereditary non-polyposis colorectal cancer 1	VAR_012944	p.Ala636Pro
									P43246	MSH2_HUMAN	hereditary non-polyposis colorectal cancer 1	VAR_004483	p.His639Tyr
									P43246	MSH2_HUMAN	hereditary non-polyposis colorectal cancer 1	VAR_043775	p.His639Arg
									P47736	RPGP1_HUMAN	breast cancer	VAR_035547	p.Cys257Arg
									P48735	IDHP_HUMAN	d-2-hydroxyglutaric aciduria 2	VAR_065174	p.Arg140Gly
									P48735	IDHP_HUMAN	d-2-hydroxyglutaric aciduria 2	VAR_065175	p.Arg140Gln
									P49748	ACADV_HUMAN	acyl-coa dehydrogenase very long-chain deficiency	VAR_000337	p.Leu243Arg
									P49773	HINT1_HUMAN	neuromyotonia and axonal neuropathy, autosomal recessive	VAR_069212	p.Arg37Pro
									P51587	BRCA2_HUMAN	breast cancer	VAR_020709	p.Arg448His
									P51608	MECP2_HUMAN	mental retardation, x-linked, syndromic, 13	VAR_018225	p.Arg453Gln
									P52732	KIF11_HUMAN	microcephaly with or without chorioretinopathy, lymphedema, or mental retardation	VAR_067829	p.Phe144Leu
									P52895	AK1C2_HUMAN	46,xy sex reversal 8	VAR_066632	p.Ile79Val
									P54577	SYYC_HUMAN	charcot-marie-tooth disease, dominant, intermediate type, c	VAR_026684	p.Glu196Lys
									P55017	S12A3_HUMAN	gitelman syndrome	VAR_039480	p.Arg145His
									P55072	TERA_HUMAN	amyotrophic lateral sclerosis 14, with or without frontotemporal dementia	VAR_065910	p.Arg159Gly
									P55072	TERA_HUMAN	inclusion body myopathy with early-onset paget disease with or without frontotemporal dementia 1	VAR_033020	p.Arg159His
									P55084	ECHB_HUMAN	trifunctional protein deficiency	VAR_021136	p.Pro294Leu
									P55084	ECHB_HUMAN	trifunctional protein deficiency	VAR_021137	p.Pro294Arg
									P58012	FOXL2_HUMAN	blepharophimosis, ptosis, and epicanthus inversus syndrome	VAR_046495	p.Ser101Arg
									P58012	FOXL2_HUMAN	blepharophimosis, ptosis, and epicanthus inversus syndrome	VAR_046496	p.Ile102Thr
									P58012	FOXL2_HUMAN	blepharophimosis, ptosis, and epicanthus inversus syndrome	VAR_046497	p.Arg103Cys
									P58012	FOXL2_HUMAN	granulosa-cell tumors of the ovary	VAR_062548	p.Cys134Trp
									P58012	FOXL2_HUMAN	blepharophimosis, ptosis, and epicanthus inversus syndrome	VAR_046493	p.Phe90Ser
									P58012	FOXL2_HUMAN	blepharophimosis, ptosis, and epicanthus inversus syndrome	VAR_046494	p.Trp98Gly
									P58012	FOXL2_HUMAN	blepharophimosis, ptosis, and epicanthus inversus syndrome	VAR_062546	p.Trp98Arg
									P60174	TPIS_HUMAN	triosephosphate isomerase deficiency	VAR_007540	p.Val269Met
									P60174	TPIS_HUMAN	triosephosphate isomerase deficiency	VAR_007541	p.Phe278Leu
									P60484	PTEN_HUMAN	multiple cancers	VAR_011588	p.Val119Leu
									P60484	PTEN_HUMAN	multiple cancers	VAR_011588	p.Val119Leu
									P60484	PTEN_HUMAN	glioblastoma	VAR_026259	p.Ala121Pro
									P60484	PTEN_HUMAN	glioblastoma	VAR_026259	p.Ala121Pro
									P60484	PTEN_HUMAN	squamous cell carcinoma of the head and neck	VAR_018103	p.Ala121Gly
									P60484	PTEN_HUMAN	cowden syndrome 1	VAR_007463	p.His123Arg
									P60484	PTEN_HUMAN	endometrial cancer	VAR_026260	p.His123Tyr
									P60484	PTEN_HUMAN	cowden syndrome 1	VAR_007464	p.Cys124Arg
									P60484	PTEN_HUMAN	cowden syndrome 1	VAR_018104	p.Cys124Ser
									P60484	PTEN_HUMAN	cowden syndrome 1	VAR_007465	p.Gly129Glu
									P60484	PTEN_HUMAN	glioblastoma	VAR_007466	p.Gly129Arg
									P60484	PTEN_HUMAN	glioblastoma	VAR_007466	p.Gly129Arg
									P60484	PTEN_HUMAN	cowden syndrome 1	VAR_007467	p.Arg130Leu
									P60484	PTEN_HUMAN	cowden syndrome 1	VAR_007468	p.Arg130Gln
									P60484	PTEN_HUMAN	prostate cancer	VAR_007469	p.Met134Leu
									P60484	PTEN_HUMAN	bannayan-riley-ruvalcaba syndrome	VAR_008736	p.Ile135Val
									P60709	ACTB_HUMAN	baraitser-winter syndrome 1	VAR_067812	p.Arg196Cys
									P60709	ACTB_HUMAN	baraitser-winter syndrome 1	VAR_067813	p.Arg196His
									P60709	ACTB_HUMAN	baraitser-winter syndrome 1	VAR_067811	p.Leu65Val
									P60891	PRPS1_HUMAN	phosphoribosylpyrophosphate synthetase superactivity	VAR_016046	p.Ala190Val
									P60891	PRPS1_HUMAN	phosphoribosylpyrophosphate synthetase superactivity	VAR_016047	p.His193Gln
									P62158	CALM_HUMAN	ventricular tachycardia, catecholaminergic polymorphic, 4	VAR_069223	p.Asn98Ser
									P62736	ACTA_HUMAN	aortic aneurysm, familial thoracic 6	VAR_062581	p.Thr326Asn
									P62805	H4_HUMAN	breast cancer	VAR_036206	p.Glu64Gln
									P63261	ACTG_HUMAN	deafness, autosomal dominant, 20	VAR_032438	p.Pro332Ala
									P63316	TNNC1_HUMAN	cardiomyopathy, familial hypertrophic 13	VAR_063070	p.Ala8Val
									P68032	ACTC_HUMAN	cardiomyopathy, familial hypertrophic 11	VAR_012861	p.Ala333Pro
									P68133	ACTS_HUMAN	nemaline myopathy 3	VAR_062455	p.Arg198Leu
									P68133	ACTS_HUMAN	nemaline myopathy 3	VAR_062456	p.Gly199Ser
									P68133	ACTS_HUMAN	myopathy, congenital, with fiber-type disproportion	VAR_032919	p.Pro334Ser
									P68133	ACTS_HUMAN	nemaline myopathy 3	VAR_062473	p.Glu336Ala
									P68133	ACTS_HUMAN	nemaline myopathy 3	VAR_062430	p.Val45Phe
									P68133	ACTS_HUMAN	nemaline myopathy 3	VAR_062431	p.Ile66Asn
									P68133	ACTS_HUMAN	nemaline myopathy 3	VAR_062432	p.Thr68Ile
									P68133	ACTS_HUMAN	nemaline myopathy 3	VAR_062433	p.Glu74Lys
									P68133	ACTS_HUMAN	nemaline myopathy 3	VAR_062434	p.His75Leu
									P68133	ACTS_HUMAN	nemaline myopathy 3	VAR_062435	p.His75Arg
									P68133	ACTS_HUMAN	nemaline myopathy 3	VAR_062436	p.Ile77Leu
									Q05066	SRY_HUMAN	46,xy sex reversal 1	VAR_017304	p.Pro131Arg
									Q05066	SRY_HUMAN	46,xy sex reversal 1	VAR_003734	p.Arg133Trp
									Q06124	PTN11_HUMAN	noonan syndrome 1	VAR_027183	p.Thr2Ile
									Q06124	PTN11_HUMAN	leopard syndrome 1	VAR_015614	p.Tyr279Cys
									Q06124	PTN11_HUMAN	leopard syndrome 1	VAR_027188	p.Tyr279Ser
									Q06124	PTN11_HUMAN	noonan syndrome 1	VAR_015614	p.Tyr279Cys
									Q06124	PTN11_HUMAN	noonan syndrome 1	VAR_015615	p.Ile282Val
									Q06124	PTN11_HUMAN	noonan syndrome 1	VAR_015616	p.Phe285Ser
									Q06124	PTN11_HUMAN	noonan syndrome 1	VAR_015617	p.Phe285Leu
									Q09472	EP300_HUMAN	breast cancer	VAR_014429	p.Glu1013Gly
									Q13285	STF1_HUMAN	46,xy sex reversal 3	VAR_039106	p.Cys33Ser
									Q13285	STF1_HUMAN	46,xy sex reversal 3	VAR_004737	p.Gly35Glu
									Q13285	STF1_HUMAN	46,xy sex reversal 3	VAR_063256	p.Met78Ile
									Q13315	ATM_HUMAN	b-cell chronic lymphocytic leukemia	VAR_010895	p.Lys3018Asn
									Q13485	SMAD4_HUMAN	myhre syndrome	VAR_067602	p.Ile500Met
									Q13485	SMAD4_HUMAN	myhre syndrome	VAR_067603	p.Ile500Thr
									Q13485	SMAD4_HUMAN	myhre syndrome	VAR_067604	p.Ile500Val
									Q13509	TBB3_HUMAN	congenital fibrosis of extraocular muscles 3a	VAR_062758	p.Arg62Gln
									Q13813	SPTN1_HUMAN	breast cancer	VAR_035455	p.Pro1017Ser
									Q14683	SMC1A_HUMAN	cornelia de lange syndrome 2	VAR_062796	p.Arg711Trp
									Q14683	SMC1A_HUMAN	cornelia de lange syndrome 2	VAR_064542	p.Arg711Gln
									Q15025	TNIP1_HUMAN	gastrointestinal diffuse large cell lymphoma	VAR_067965	p.Arg263Trp
									Q15181	IPYR_HUMAN	breast cancer	VAR_036358	p.Lys57Asn
									Q15797	SMAD1_HUMAN	primary pulmonary hypertension	VAR_066869	p.Val3Ala
									Q15831	STK11_HUMAN	peutz-jeghers syndrome	VAR_007922	p.Arg297Lys
									Q15831	STK11_HUMAN	colorectal cancer	VAR_065657	p.Pro314His
									Q15831	STK11_HUMAN	peutz-jeghers syndrome	VAR_033144	p.Pro315Ser
									Q15831	STK11_HUMAN	melanoma	VAR_033138	p.Tyr49Asp
									Q15831	STK11_HUMAN	melanoma	VAR_033138	p.Tyr49Asp
									Q16281	CNGA3_HUMAN	achromatopsia 2	VAR_047566	p.Asp162Val
									Q16445	GBRA6_HUMAN	colorectal cancer	VAR_036033	p.Pro180His
									Q16539	MK14_HUMAN	gastric adenocarcinoma	VAR_042270	p.Ala51Val
									Q16637	SMN_HUMAN	spinal muscular atrophy 2	VAR_005615	p.Ala2Gly
									Q16637	SMN_HUMAN	spinal muscular atrophy 3	VAR_005615	p.Ala2Gly
									Q5VUA4	ZN318_HUMAN	breast cancer	VAR_036057	p.Gly1274Arg
									Q6KC79	NIPBL_HUMAN	cornelia de lange syndrome 1	VAR_021598	p.Ala1246Gly
									Q6P1J9	CDC73_HUMAN	adenoma	VAR_064927	p.Ala2Ser
									Q6PI48	SYDM_HUMAN	leukoencephalopathy with brainstem and spinal cord involvement and lactate elevation	VAR_037023	p.Leu626Gln
									Q6PI48	SYDM_HUMAN	leukoencephalopathy with brainstem and spinal cord involvement and lactate elevation	VAR_037024	p.Leu626Val
									Q6PI48	SYDM_HUMAN	leukoencephalopathy with brainstem and spinal cord involvement and lactate elevation	VAR_037025	p.Tyr629Cys
									Q71U36	TBA1A_HUMAN	lissencephaly 3	VAR_039336	p.Arg402Cys
									Q71U36	TBA1A_HUMAN	lissencephaly 3	VAR_039337	p.Arg402His
									Q8NBU5	ATAD1_HUMAN	colorectal cancer	VAR_035903	p.Val107Ile
									Q8NF91	SYNE1_HUMAN	emery-dreifuss muscular dystrophy 4, autosomal dominant	VAR_062975	p.Val8387Leu
									Q8WZ42	TITIN_HUMAN	gastric adenocarcinoma	VAR_040252	p.Phe23952Leu
									Q92466	DDB2_HUMAN	xeroderma pigmentosum complementation group e	VAR_010142	p.Arg273His
									Q92793	CBP_HUMAN	rubinstein-taybi syndrome 1	VAR_015578	p.Arg1378Pro
									Q93099	HGD_HUMAN	alkaptonuria	VAR_005275	p.Trp97Gly
									Q96A72	MGN2_HUMAN	breast cancer	VAR_036431	p.Glu119Lys
									Q96RP9	EFGM_HUMAN	combined oxidative phosphorylation deficiency 1	VAR_021512	p.Asn174Ser
									Q99497	PARK7_HUMAN	parkinson disease 7	VAR_020496	p.Asp149Ala
									Q99879	H2B1M_HUMAN	colorectal cancer	VAR_036205	p.His110Tyr
									Q9H3R5	CENPH_HUMAN	colorectal cancer	VAR_036167	p.Glu2Lys
									Q9H4B7	TBB1_HUMAN	macrothrombocytopenia, autosomal dominant, tubb1-related	VAR_063411	p.Arg318Trp
									Q9H9P8	L2HDH_HUMAN	l-2-hydroxyglutaric aciduria	VAR_025685	p.His98Arg
									Q9H9P8	L2HDH_HUMAN	l-2-hydroxyglutaric aciduria	VAR_025686	p.His98Tyr
									Q9NTK5	OLA1_HUMAN	breast cancer	VAR_036613	p.Glu168Gln
									Q9NTK5	OLA1_HUMAN	breast cancer	VAR_036613	p.Glu168Gln
									Q9UBC5	MYO1A_HUMAN	deafness, autosomal dominant, 48	VAR_015948	p.Gly662Glu
									Q9Y3A5	SBDS_HUMAN	shwachman-diamond syndrome	VAR_015390	p.Asn8Lys
									Q9Y6D9	MD1L1_HUMAN	prostate cancer	VAR_019708	p.Arg59Cys

## Sheet: Glycosylation
Glycosylatio[Exact Match]								Glycosylation[±2]
	O14773	TPP1_HUMAN	ceroid lipofuscinosis, neuronal, 2	VAR_016796	p.Asn286Ser				O14773	TPP1_HUMAN	ceroid lipofuscinosis, neuronal, 2	VAR_066884	p.Tyr209His
	P00451	FA8_HUMAN	hemophilia a	VAR_028568	p.Asn601Asp				O14773	TPP1_HUMAN	ceroid lipofuscinosis, neuronal, 2	VAR_016795	p.Gly284Val
	P00451	FA8_HUMAN	hemophilia a	VAR_028569	p.Asn601Lys				O14773	TPP1_HUMAN	ceroid lipofuscinosis, neuronal, 2	VAR_016796	p.Asn286Ser
	P04275	VWF_HUMAN	von willebrand disease 3	VAR_009144	p.Asn2546Tyr				O14773	TPP1_HUMAN	ceroid lipofuscinosis, neuronal, 2	VAR_009606	p.Ile287Asn
	P06280	AGAL_HUMAN	fabry disease	VAR_000464	p.Asn215Ser				O15118	NPC1_HUMAN	niemann-pick disease c1	VAR_043176	p.Thr137Met
	P06858	LIPL_HUMAN	lipoprotein lipase deficiency	VAR_057914	p.Asn70Ser				P00451	FA8_HUMAN	hemophilia a	VAR_028568	p.Asn601Asp
	P06865	HEXA_HUMAN	gm2-gangliosidosis 1	VAR_017189	p.Asn295Ser				P00451	FA8_HUMAN	hemophilia a	VAR_028569	p.Asn601Lys
	P07602	SAP_HUMAN	leukodystrophy metachromatic	VAR_031823	p.Asn215His				P00451	FA8_HUMAN	hemophilia a	VAR_028570	p.Arg602Gly
	P07602	SAP_HUMAN	leukodystrophy metachromatic	VAR_031899	p.Asn215Lys				P00451	FA8_HUMAN	hemophilia a	VAR_001117	p.Ser603Ile
	P08246	ELNE_HUMAN	neutropenia, severe congenital 1, autosomal dominant	VAR_070738	p.Asn124Ile				P00451	FA8_HUMAN	hemophilia a	VAR_028571	p.Ser603Arg
	P17405	ASM_HUMAN	niemann-pick disease b	VAR_068440	p.Asn520Ser				P00740	FA9_HUMAN	hemophilia b	VAR_006547	p.Pro101Arg
	P22304	IDS_HUMAN	mucopolysaccharidosis 2	VAR_007332	p.Asn115Tyr				P00740	FA9_HUMAN	hemophilia b	VAR_006549	p.Gly106Ser
	P25445	TNR6_HUMAN	squamous cell carcinoma	VAR_018321	p.Asn118Ser				P00740	FA9_HUMAN	hemophilia b	VAR_017346	p.Gly106Asp
	P31785	IL2RG_HUMAN	severe combined immunodeficiency x-linked t-cell-negative/b-cell-positive/nk-cell-negative	VAR_002672	p.Asn84Lys				P00740	FA9_HUMAN	hemophilia b	VAR_006550	p.Cys108Ser
	P34059	GALNS_HUMAN	mucopolysaccharidosis 4a	VAR_007203	p.Asn204Lys				P00740	FA9_HUMAN	hemophilia b	VAR_006546	p.Cys97Ser
	Q96G97	BSCL2_HUMAN	neuronopathy, distal hereditary motor, 5a	VAR_022375	p.Asn88Ser				P00748	FA12_HUMAN	hereditary angioedema 3	VAR_031501	p.Thr328Lys
	Q96G97	BSCL2_HUMAN	spastic paraplegia 17, autosomal dominant	VAR_022375	p.Asn88Ser				P00748	FA12_HUMAN	hereditary angioedema 3	VAR_031502	p.Thr328Arg
	P04637	P53_HUMAN	sporadic cancers	VAR_005893	p.Ser149Pro				P00751	CFAB_HUMAN	hemolytic uremic syndrome atypical 4	VAR_063221	p.Phe286Leu
	P04637	P53_HUMAN	sporadic cancers	VAR_044810	p.Ser149Phe				P01008	ANT3_HUMAN	antithrombin iii deficiency	VAR_027455	p.Cys127Arg
	P04637	P53_HUMAN	sporadic cancers	VAR_044811	p.Ser149Thr				P01008	ANT3_HUMAN	antithrombin iii deficiency	VAR_027463	p.Ser223Pro
	P08709	FA7_HUMAN	factor vii deficiency	VAR_015136	p.Ser120Pro				P01008	ANT3_HUMAN	antithrombin iii deficiency	VAR_007033	p.Ile39Asn
	P00748	FA12_HUMAN	hereditary angioedema 3	VAR_031501	p.Thr328Lys				P01106	MYC_HUMAN	burkitt lymphoma	VAR_063385	p.Pro57Ser
	P00748	FA12_HUMAN	hereditary angioedema 3	VAR_031502	p.Thr328Arg				P01106	MYC_HUMAN	burkitt lymphoma	VAR_063386	p.Pro59Ala
	P15382	KCNE1_HUMAN	jervell and lange-nielsen syndrome 2	VAR_008897	p.Thr7Ile				P01137	TGFB1_HUMAN	camurati-engelmann disease	VAR_017607	p.Tyr81His
	P25445	TNR6_HUMAN	autoimmune lymphoproliferative syndrome 1a	VAR_013417	p.Thr28Ala				P02452	CO1A1_HUMAN	osteogenesis imperfecta 1	VAR_001646	p.Gly263Arg
									P02452	CO1A1_HUMAN	osteogenesis imperfecta 1	VAR_001647	p.Gly263Val
									P02452	CO1A1_HUMAN	osteogenesis imperfecta 1	VAR_063298	p.Gly266Glu
									P02458	CO2A1_HUMAN	platyspondylic lethal skeletal dysplasia torrance type	VAR_024822	p.Thr1390Asn
									P02461	CO3A1_HUMAN	ehlers-danlos syndrome 4	VAR_011111	p.Gly264Arg
									P02766	TTHY_HUMAN	amyloidosis, transthyretin-related	VAR_007588	p.Ala117Gly
									P02766	TTHY_HUMAN	amyloidosis, transthyretin-related	VAR_038982	p.Ala117Ser
									P03951	FA11_HUMAN	factor xi deficiency	VAR_012095	p.Thr493Ile
									P03952	KLKB1_HUMAN	prekallikrein deficiency	VAR_054907	p.Gly123Arg
									P04062	GLCM_HUMAN	gaucher disease	VAR_010064	p.Ser310Asn
									P04070	PROC_HUMAN	thrombophilia	VAR_006679	p.Pro289Leu
									P04070	PROC_HUMAN	thrombophilia	VAR_006696	p.Pro369Leu
									P04156	PRIO_HUMAN	creutzfeldt-jakob disease	VAR_006470	p.Val180Ile
									P04156	PRIO_HUMAN	familial spongiform encephalopathy	VAR_006471	p.Thr183Ala
									P04156	PRIO_HUMAN	creutzfeldt-jakob disease	VAR_008749	p.Glu196Lys
									P04156	PRIO_HUMAN	gerstmann-straussler disease	VAR_006472	p.Phe198Ser
									P04180	LCAT_HUMAN	fish-eye disease	VAR_039033	p.Thr298Ala
									P04180	LCAT_HUMAN	lecithin-cholesterol acyltransferase deficiency	VAR_039033	p.Thr298Ala
									P04180	LCAT_HUMAN	lecithin-cholesterol acyltransferase deficiency	VAR_039034	p.Thr298Ile
									P04180	LCAT_HUMAN	lecithin-cholesterol acyltransferase deficiency	VAR_039038	p.Phe406Val
									P04275	VWF_HUMAN	von willebrand disease 1	VAR_064925	p.Cys1149Arg
									P04275	VWF_HUMAN	von willebrand disease 2	VAR_005808	p.Phe1514Cys
									P04275	VWF_HUMAN	von willebrand disease 3	VAR_009144	p.Asn2546Tyr
									P04629	NTRK1_HUMAN	congenital insensitivity to pain with anhidrosis	VAR_068481	p.Tyr359Cys
									P04629	NTRK1_HUMAN	congenital insensitivity to pain with anhidrosis	VAR_009624	p.Leu93Pro
									P04637	P53_HUMAN	sporadic cancer	VAR_044802	p.Val147Phe
									P04637	P53_HUMAN	sporadic cancers	VAR_005891	p.Val147Asp
									P04637	P53_HUMAN	sporadic cancers	VAR_005892	p.Val147Gly
									P04637	P53_HUMAN	sporadic cancers	VAR_044800	p.Val147Ala
									P04637	P53_HUMAN	sporadic cancers	VAR_044801	p.Val147Glu
									P04637	P53_HUMAN	sporadic cancers	VAR_044803	p.Val147Ile
									P04637	P53_HUMAN	sporadic cancer	VAR_044804	p.Asp148Ala
									P04637	P53_HUMAN	sporadic cancer	VAR_044806	p.Asp148Gly
									P04637	P53_HUMAN	sporadic cancers	VAR_044805	p.Asp148Glu
									P04637	P53_HUMAN	sporadic cancers	VAR_044807	p.Asp148Asn
									P04637	P53_HUMAN	sporadic cancers	VAR_044808	p.Asp148Val
									P04637	P53_HUMAN	sporadic cancers	VAR_044809	p.Asp148Tyr
									P04637	P53_HUMAN	sporadic cancers	VAR_005893	p.Ser149Pro
									P04637	P53_HUMAN	sporadic cancers	VAR_044810	p.Ser149Phe
									P04637	P53_HUMAN	sporadic cancers	VAR_044811	p.Ser149Thr
									P04637	P53_HUMAN	sporadic cancer	VAR_044812	p.Thr150Ala
									P04637	P53_HUMAN	sporadic cancer	VAR_044815	p.Thr150Asn
									P04637	P53_HUMAN	sporadic cancer	VAR_044816	p.Thr150Pro
									P04637	P53_HUMAN	sporadic cancer	VAR_044817	p.Thr150Arg
									P04637	P53_HUMAN	sporadic cancers	VAR_044813	p.Thr150Ile
									P04637	P53_HUMAN	sporadic cancers	VAR_044814	p.Thr150Lys
									P04637	P53_HUMAN	li-fraumeni syndrome	VAR_005895	p.Pro151Ser
									P04637	P53_HUMAN	li-fraumeni syndrome	VAR_005896	p.Pro151Thr
									P04637	P53_HUMAN	sporadic cancers	VAR_005894	p.Pro151Ala
									P04637	P53_HUMAN	sporadic cancers	VAR_044818	p.Pro151His
									P04637	P53_HUMAN	sporadic cancers	VAR_044819	p.Pro151Leu
									P04637	P53_HUMAN	sporadic cancers	VAR_044820	p.Pro151Arg
									P06213	INSR_HUMAN	rabson-mendenhall syndrome	VAR_004079	p.Asn42Lys
									P06276	CHLE_HUMAN	butyrylcholinesterase deficiency	VAR_040027	p.Thr271Met
									P06280	AGAL_HUMAN	fabry disease	VAR_012387	p.Gly138Arg
									P06280	AGAL_HUMAN	fabry disease	VAR_000464	p.Asn215Ser
									P06280	AGAL_HUMAN	fabry disease	VAR_012400	p.Tyr216Asp
									P06858	LIPL_HUMAN	lipoprotein lipase deficiency	VAR_057914	p.Asn70Ser
									P06865	HEXA_HUMAN	gm2-gangliosidosis 1	VAR_017189	p.Asn295Ser
									P07196	NFL_HUMAN	charcot-marie-tooth disease 2e	VAR_016021	p.Pro22Ser
									P07225	PROS_HUMAN	thrombophilia	VAR_046862	p.Ser501Ala
									P07225	PROS_HUMAN	thrombophilia	VAR_046870	p.Thr532Ala
									P07602	SAP_HUMAN	leukodystrophy metachromatic	VAR_031823	p.Asn215His
									P07602	SAP_HUMAN	leukodystrophy metachromatic	VAR_031899	p.Asn215Lys
									P07602	SAP_HUMAN	leukodystrophy metachromatic	VAR_006943	p.Thr217Ile
									P07911	UROM_HUMAN	familial juvenile hyperuricemic nephropathy 1	VAR_025950	p.Cys77Tyr
									P08246	ELNE_HUMAN	neutropenia, severe congenital 1, autosomal dominant	VAR_070737	p.Leu123His
									P08246	ELNE_HUMAN	neutropenia, severe congenital 1, autosomal dominant	VAR_070738	p.Asn124Ile
									P08246	ELNE_HUMAN	cyclic haematopoiesis	VAR_038619	p.Ser126Leu
									P08246	ELNE_HUMAN	neutropenia, severe congenital 1, autosomal dominant	VAR_038619	p.Ser126Leu
									P08709	FA7_HUMAN	factor vii deficiency	VAR_015136	p.Ser120Pro
									P08709	FA7_HUMAN	factor vii deficiency	VAR_014407	p.Cys121Phe
									P08709	FA7_HUMAN	factor vii deficiency	VAR_065410	p.Thr384Met
									P10253	LYAG_HUMAN	glycogen storage disease 2	VAR_068576	p.Thr234Lys
									P10253	LYAG_HUMAN	glycogen storage disease 2	VAR_068577	p.Thr234Arg
									P10253	LYAG_HUMAN	glycogen storage disease 2	VAR_068593	p.Met391Val
									P10253	LYAG_HUMAN	glycogen storage disease 2	VAR_018097	p.Ala880Asp
									P12110	CO6A2_HUMAN	ullrich congenital muscular dystrophy	VAR_058234	p.Arg784His
									P12111	CO6A3_HUMAN	bethlem myopathy	VAR_058261	p.Gly2080Asp
									P12259	FA5_HUMAN	colorectal cancer	VAR_035817	p.Ser775Ala
									P12883	MYH7_HUMAN	cardiomyopathy, dilated 1s	VAR_067263	p.Leu1297Val
									P12883	MYH7_HUMAN	cardiomyopathy, familial hypertrophic 1	VAR_042834	p.Arg1712Trp
									P15289	ARSA_HUMAN	leukodystrophy metachromatic	VAR_054178	p.Cys156Arg
									P15382	KCNE1_HUMAN	jervell and lange-nielsen syndrome 2	VAR_008897	p.Thr7Ile
									P16278	BGAL_HUMAN	gm1-gangliosidosis	VAR_037945	p.Gly554Glu
									P16473	TSHR_HUMAN	papillary cancer	VAR_003567	p.Phe197Ile
									P16473	TSHR_HUMAN	papillary cancer	VAR_003567	p.Phe197Ile
									P17405	ASM_HUMAN	niemann-pick disease b	VAR_060876	p.Ile176Asn
									P17405	ASM_HUMAN	niemann-pick disease b	VAR_068440	p.Asn520Ser
									P20933	ASPG_HUMAN	aspartylglucosaminuria	VAR_005075	p.Cys306Arg
									P22304	IDS_HUMAN	mucopolysaccharidosis 2	VAR_007332	p.Asn115Tyr
									P22304	IDS_HUMAN	mucopolysaccharidosis 2	VAR_026926	p.Ser117Tyr
									P22304	IDS_HUMAN	mucopolysaccharidosis 2	VAR_007341	p.Ser143Phe
									P22413	ENPP1_HUMAN	ossification of the posterior longitudinal ligament of the spine	VAR_014143	p.Ser287Phe
									P22413	ENPP1_HUMAN	arterial calcification of infancy, generalized, 1	VAR_037433	p.Gly342Val
									P23945	FSHR_HUMAN	ovarian dysgenesis 1	VAR_018046	p.Ala189Val
									P25445	TNR6_HUMAN	squamous cell carcinoma	VAR_018321	p.Asn118Ser
									P25445	TNR6_HUMAN	autoimmune lymphoproliferative syndrome 1a	VAR_013417	p.Thr28Ala
									P31785	IL2RG_HUMAN	severe combined immunodeficiency x-linked t-cell-negative/b-cell-positive/nk-cell-negative	VAR_002672	p.Asn84Lys
									P34059	GALNS_HUMAN	mucopolysaccharidosis 4a	VAR_024896	p.Ala203Val
									P34059	GALNS_HUMAN	mucopolysaccharidosis 4a	VAR_007203	p.Asn204Lys
									P35555	FBN1_HUMAN	marfan syndrome	VAR_064503	p.Cys1068Gly
									P40200	TACT_HUMAN	c syndrome	VAR_037578	p.Thr280Met
									P41180	CASR_HUMAN	hypocalcemia, autosomal dominant 1	VAR_058053	p.Phe128Leu
									P41180	CASR_HUMAN	hypocalcemia, autosomal dominant 1	VAR_058054	p.Cys131Trp
									P51688	SPHM_HUMAN	mucopolysaccharidosis 3a	VAR_007388	p.Tyr40Asn
									P51688	SPHM_HUMAN	mucopolysaccharidosis 3a	VAR_054672	p.Asn42Lys
									P54802	ANAG_HUMAN	mucopolysaccharidosis 3b	VAR_054730	p.Ser534Tyr
									P68133	ACTS_HUMAN	nemaline myopathy 3	VAR_062456	p.Gly199Ser
									P78363	ABCA4_HUMAN	stargardt disease 1	VAR_012502	p.Ser100Pro
									P78363	ABCA4_HUMAN	stargardt disease 1	VAR_008412	p.Ser445Arg
									P78363	ABCA4_HUMAN	stargardt disease 1	VAR_008403	p.Asn96Asp
									P78363	ABCA4_HUMAN	stargardt disease 1	VAR_008404	p.Asn96His
									Q02388	CO7A1_HUMAN	epidermolysis bullosa dystrophica, pretibial type	VAR_001832	p.Gly2623Cys
									Q12809	KCNH2_HUMAN	long qt syndrome 2	VAR_068267	p.Pro596Arg
									Q15303	ERBB4_HUMAN	colorectal adenocarcinoma	VAR_042113	p.Thr140Ile
									Q15465	SHH_HUMAN	holoprosencephaly 3	VAR_062628	p.Ser280Trp
									Q96G97	BSCL2_HUMAN	neuronopathy, distal hereditary motor, 5a	VAR_022375	p.Asn88Ser
									Q96G97	BSCL2_HUMAN	spastic paraplegia 17, autosomal dominant	VAR_022375	p.Asn88Ser
									Q96G97	BSCL2_HUMAN	neuronopathy, distal hereditary motor, 5a	VAR_022376	p.Ser90Leu
									Q96G97	BSCL2_HUMAN	spastic paraplegia 17, autosomal dominant	VAR_022376	p.Ser90Leu
									Q9GZU1	MCLN1_HUMAN	mucolipidosis type iv	VAR_019370	p.Thr232Pro
									Q9GZV9	FGF23_HUMAN	hypophosphatemic rickets, autosomal dominant	VAR_010717	p.Arg176Gln
									Q9GZV9	FGF23_HUMAN	hypophosphatemic rickets, autosomal dominant	VAR_010718	p.Arg179Trp
									Q9GZV9	FGF23_HUMAN	hypophosphatemic rickets, autosomal dominant	VAR_010719	p.Arg179Gln

## Sheet: Metylation
Metylation[Exact Match]											Metylation[±2]
	P02489	CRYAA_HUMAN	cataract 9, multiple types	VAR_046892	p.Arg21Leu							P01241	SOMA_HUMAN	growth hormone deficiency, isolated, 1b	VAR_015807	p.Ser97Phe
	P04637	P53_HUMAN	sporadic cancer	VAR_044676	p.Arg110Gly							P02489	CRYAA_HUMAN	cataract 9, multiple types	VAR_046892	p.Arg21Leu
	P04637	P53_HUMAN	sporadic cancer	VAR_044678	p.Arg110Ser							P04637	P53_HUMAN	sporadic cancer	VAR_044671	p.Gly108Asp
	P04637	P53_HUMAN	sporadic cancers	VAR_005860	p.Arg110Cys							P04637	P53_HUMAN	sporadic cancers	VAR_044672	p.Gly108Ser
	P04637	P53_HUMAN	sporadic cancers	VAR_005862	p.Arg110Pro							P04637	P53_HUMAN	sporadic cancer	VAR_044674	p.Phe109Leu
	P04637	P53_HUMAN	sporadic cancers	VAR_044677	p.Arg110His							P04637	P53_HUMAN	sporadic cancers	VAR_044673	p.Phe109Cys
	P04637	P53_HUMAN	sporadic cancer	VAR_045065	p.Arg209Ser							P04637	P53_HUMAN	sporadic cancers	VAR_044675	p.Phe109Ser
	P04637	P53_HUMAN	sporadic cancers	VAR_045063	p.Arg209Ile							P04637	P53_HUMAN	sporadic cancer	VAR_044676	p.Arg110Gly
	P04637	P53_HUMAN	sporadic cancers	VAR_045064	p.Arg209Lys							P04637	P53_HUMAN	sporadic cancer	VAR_044678	p.Arg110Ser
	P04637	P53_HUMAN	sporadic cancers	VAR_045066	p.Arg209Thr							P04637	P53_HUMAN	sporadic cancers	VAR_005860	p.Arg110Cys
	P04637	P53_HUMAN	li-fraumeni syndrome	VAR_005955	p.Arg213Gln							P04637	P53_HUMAN	sporadic cancers	VAR_005862	p.Arg110Pro
	P04637	P53_HUMAN	li-fraumeni syndrome	VAR_036506	p.Arg213Pro							P04637	P53_HUMAN	sporadic cancers	VAR_044677	p.Arg110His
	P04637	P53_HUMAN	sporadic cancers	VAR_045084	p.Arg213Gly							P04637	P53_HUMAN	sporadic cancer	VAR_044679	p.Leu111Met
	P04637	P53_HUMAN	sporadic cancers	VAR_045085	p.Arg213Leu							P04637	P53_HUMAN	sporadic cancers	VAR_044680	p.Leu111Pro
	P04637	P53_HUMAN	sporadic cancers	VAR_045086	p.Arg213Trp							P04637	P53_HUMAN	sporadic cancers	VAR_044681	p.Leu111Gln
	P04637	P53_HUMAN	sporadic cancer	VAR_045534	p.Arg335Gly							P04637	P53_HUMAN	sporadic cancers	VAR_044682	p.Leu111Arg
	P04637	P53_HUMAN	sporadic cancer	VAR_045535	p.Arg335His							P04637	P53_HUMAN	sporadic cancers	VAR_044683	p.Gly112Asp
	P04637	P53_HUMAN	sporadic cancer	VAR_045536	p.Arg335Leu							P04637	P53_HUMAN	sporadic cancers	VAR_044684	p.Gly112Ser
	P04637	P53_HUMAN	li-fraumeni syndrome	VAR_006041	p.Arg337Cys							P04637	P53_HUMAN	sporadic cancer	VAR_045055	p.Asp207Val
	P04637	P53_HUMAN	li-fraumeni syndrome	VAR_035016	p.Arg337His							P04637	P53_HUMAN	sporadic cancer	VAR_045056	p.Asp207Tyr
	P04637	P53_HUMAN	sporadic cancers	VAR_045537	p.Arg337Leu							P04637	P53_HUMAN	sporadic cancers	VAR_045051	p.Asp207Glu
	P04637	P53_HUMAN	sporadic cancers	VAR_045538	p.Arg337Pro							P04637	P53_HUMAN	sporadic cancers	VAR_045052	p.Asp207Gly
	P04637	P53_HUMAN	sporadic cancer	VAR_045569	p.Lys370Gln							P04637	P53_HUMAN	sporadic cancers	VAR_045053	p.Asp207His
	P29033	CXB2_HUMAN	deafness, autosomal dominant, 3a	VAR_002140	p.Arg75Trp							P04637	P53_HUMAN	sporadic cancers	VAR_045054	p.Asp207Asn
	P29033	CXB2_HUMAN	keratoderma, palmoplantar, with deafness	VAR_002140	p.Arg75Trp							P04637	P53_HUMAN	sporadic cancer	VAR_045059	p.Asp208His
	P29033	CXB2_HUMAN	keratoderma, palmoplantar, with deafness	VAR_015936	p.Arg75Gln							P04637	P53_HUMAN	sporadic cancer	VAR_045062	p.Asp208Tyr
	P35637	FUS_HUMAN	amyotrophic lateral sclerosis 6	VAR_068919	p.Arg216Cys							P04637	P53_HUMAN	sporadic cancer	VAR_045809	p.Asp208Ile
	P35637	FUS_HUMAN	tremor, hereditary essential 4	VAR_068919	p.Arg216Cys							P04637	P53_HUMAN	sporadic cancers	VAR_045057	p.Asp208Glu
	P35637	FUS_HUMAN	amyotrophic lateral sclerosis 6	VAR_054837	p.Arg244Cys							P04637	P53_HUMAN	sporadic cancers	VAR_045058	p.Asp208Gly
	P49959	MRE11_HUMAN	cancer	VAR_011628	p.Arg572Gln							P04637	P53_HUMAN	sporadic cancers	VAR_045060	p.Asp208Asn
	P51608	MECP2_HUMAN	rett syndrome	VAR_018197	p.Lys210Ile							P04637	P53_HUMAN	sporadic cancers	VAR_045061	p.Asp208Val
	Q14524	SCN5A_HUMAN	long qt syndrome 3	VAR_055181	p.Arg680His							P04637	P53_HUMAN	sporadic cancer	VAR_045065	p.Arg209Ser
												P04637	P53_HUMAN	sporadic cancers	VAR_045063	p.Arg209Ile
												P04637	P53_HUMAN	sporadic cancers	VAR_045064	p.Arg209Lys
												P04637	P53_HUMAN	sporadic cancers	VAR_045066	p.Arg209Thr
												P04637	P53_HUMAN	sporadic cancer	VAR_045069	p.Asn210Ile
												P04637	P53_HUMAN	sporadic cancer	VAR_045070	p.Asn210Lys
												P04637	P53_HUMAN	sporadic cancer	VAR_045072	p.Asn210Thr
												P04637	P53_HUMAN	sporadic cancers	VAR_045067	p.Asn210Asp
												P04637	P53_HUMAN	sporadic cancers	VAR_045068	p.Asn210His
												P04637	P53_HUMAN	sporadic cancers	VAR_045071	p.Asn210Ser
												P04637	P53_HUMAN	sporadic cancer	VAR_045077	p.Thr211Pro
												P04637	P53_HUMAN	sporadic cancers	VAR_045074	p.Thr211Ala
												P04637	P53_HUMAN	sporadic cancers	VAR_045075	p.Thr211Ile
												P04637	P53_HUMAN	sporadic cancers	VAR_045076	p.Thr211Asn
												P04637	P53_HUMAN	sporadic cancers	VAR_045078	p.Thr211Ser
												P04637	P53_HUMAN	sporadic cancer	VAR_045082	p.Phe212Val
												P04637	P53_HUMAN	sporadic cancers	VAR_045079	p.Phe212Ile
												P04637	P53_HUMAN	sporadic cancers	VAR_045080	p.Phe212Leu
												P04637	P53_HUMAN	sporadic cancers	VAR_045081	p.Phe212Ser
												P04637	P53_HUMAN	sporadic cancers	VAR_045083	p.Phe212Tyr
												P04637	P53_HUMAN	li-fraumeni syndrome	VAR_005955	p.Arg213Gln
												P04637	P53_HUMAN	li-fraumeni syndrome	VAR_036506	p.Arg213Pro
												P04637	P53_HUMAN	sporadic cancers	VAR_045084	p.Arg213Gly
												P04637	P53_HUMAN	sporadic cancers	VAR_045085	p.Arg213Leu
												P04637	P53_HUMAN	sporadic cancers	VAR_045086	p.Arg213Trp
												P04637	P53_HUMAN	sporadic cancer	VAR_045088	p.His214Pro
												P04637	P53_HUMAN	sporadic cancers	VAR_045087	p.His214Asp
												P04637	P53_HUMAN	sporadic cancers	VAR_045089	p.His214Arg
												P04637	P53_HUMAN	sporadic cancers	VAR_045090	p.His214Tyr
												P04637	P53_HUMAN	sporadic cancers	VAR_047177	p.His214Gln
												P04637	P53_HUMAN	sporadic cancers	VAR_045091	p.Ser215Cys
												P04637	P53_HUMAN	sporadic cancers	VAR_045092	p.Ser215Gly
												P04637	P53_HUMAN	sporadic cancers	VAR_045093	p.Ser215Ile
												P04637	P53_HUMAN	sporadic cancers	VAR_045094	p.Ser215Asn
												P04637	P53_HUMAN	sporadic cancers	VAR_045095	p.Ser215Arg
												P04637	P53_HUMAN	sporadic cancers	VAR_045096	p.Ser215Thr
												P04637	P53_HUMAN	sporadic cancers	VAR_045810	p.Ser215Lys
												P04637	P53_HUMAN	sporadic cancers	VAR_045529	p.Gln331His
												P04637	P53_HUMAN	sporadic cancers	VAR_045530	p.Gln331Pro
												P04637	P53_HUMAN	sporadic cancers	VAR_045531	p.Gln331Arg
												P04637	P53_HUMAN	sporadic cancer	VAR_045532	p.Ile332Val
												P04637	P53_HUMAN	sporadic cancer	VAR_045533	p.Gly334Trp
												P04637	P53_HUMAN	sporadic cancers	VAR_006040	p.Gly334Val
												P04637	P53_HUMAN	sporadic cancer	VAR_045534	p.Arg335Gly
												P04637	P53_HUMAN	sporadic cancer	VAR_045535	p.Arg335His
												P04637	P53_HUMAN	sporadic cancer	VAR_045536	p.Arg335Leu
												P04637	P53_HUMAN	li-fraumeni syndrome	VAR_006041	p.Arg337Cys
												P04637	P53_HUMAN	li-fraumeni syndrome	VAR_035016	p.Arg337His
												P04637	P53_HUMAN	sporadic cancers	VAR_045537	p.Arg337Leu
												P04637	P53_HUMAN	sporadic cancers	VAR_045538	p.Arg337Pro
												P04637	P53_HUMAN	sporadic cancer	VAR_045539	p.Phe338Ile
												P04637	P53_HUMAN	sporadic cancer	VAR_045540	p.Phe338Leu
												P04637	P53_HUMAN	sporadic cancer	VAR_022316	p.Glu339Lys
												P04637	P53_HUMAN	sporadic cancer	VAR_045541	p.Glu339Gln
												P04637	P53_HUMAN	sporadic cancer	VAR_045569	p.Lys370Gln
												P04637	P53_HUMAN	sporadic cancer	VAR_045573	p.Phe385Leu
												P29033	CXB2_HUMAN	keratoderma, palmoplantar, with deafness	VAR_060799	p.His73Arg
												P29033	CXB2_HUMAN	deafness, autosomal dominant, 3a	VAR_002140	p.Arg75Trp
												P29033	CXB2_HUMAN	keratoderma, palmoplantar, with deafness	VAR_002140	p.Arg75Trp
												P29033	CXB2_HUMAN	keratoderma, palmoplantar, with deafness	VAR_015936	p.Arg75Gln
												P29033	CXB2_HUMAN	deafness, autosomal recessive, 1a	VAR_002141	p.Trp77Arg
												P35637	FUS_HUMAN	amyotrophic lateral sclerosis 6	VAR_068919	p.Arg216Cys
												P35637	FUS_HUMAN	tremor, hereditary essential 4	VAR_068919	p.Arg216Cys
												P35637	FUS_HUMAN	amyotrophic lateral sclerosis 6	VAR_054837	p.Arg244Cys
												P49959	MRE11_HUMAN	cancer	VAR_011628	p.Arg572Gln
												P51608	MECP2_HUMAN	rett syndrome	VAR_023555	p.Tyr120Asp
												P51608	MECP2_HUMAN	rett syndrome	VAR_018197	p.Lys210Ile
												Q14524	SCN5A_HUMAN	progressive familial heart block 1a	VAR_036662	p.Thr512Ile
												Q14524	SCN5A_HUMAN	brugada syndrome 1	VAR_017673	p.Gly514Cys
												Q14524	SCN5A_HUMAN	progressive familial heart block 1a	VAR_017673	p.Gly514Cys
												Q14524	SCN5A_HUMAN	atrial fibrillation	VAR_036663	p.Ser524Tyr
												Q14524	SCN5A_HUMAN	long qt syndrome 3	VAR_055181	p.Arg680His
												Q14524	SCN5A_HUMAN	brugada syndrome 1	VAR_026359	p.His681Pro

## Sheet: SUMOylation
SUMOylation[±2]
	P00441	SODC_HUMAN	amyotrophic lateral sclerosis 1	VAR_013529	p.Asp77Tyr
	P02545	LMNA_HUMAN	cardiomyopathy, dilated 1a	VAR_009978	p.Glu203Gly
	P02545	LMNA_HUMAN	cardiomyopathy, dilated 1a	VAR_039767	p.Glu203Lys
	P03372	ESR1_HUMAN	breast cancer	VAR_033029	p.Met264Ile
	P04637	P53_HUMAN	sporadic cancer	VAR_045573	p.Phe385Leu
	P09874	PARP1_HUMAN	breast cancer	VAR_035852	p.Glu488Val
	P37840	SYUA_HUMAN	dementia lewy body	VAR_022703	p.Glu46Lys
	P37840	SYUA_HUMAN	parkinson disease 1	VAR_022703	p.Glu46Lys
	P40337	VHL_HUMAN	von hippel-lindau disease	VAR_005763	p.Val170Asp
	P40337	VHL_HUMAN	von hippel-lindau disease	VAR_005764	p.Val170Phe
	P40337	VHL_HUMAN	von hippel-lindau disease	VAR_005765	p.Val170Gly
	Q9Y6K9	NEMO_HUMAN	ectodermal dysplasia, anhidrotic, with immunodeficiency x-linked	VAR_011323	p.Asp311Asn

## Sheet: Hydroxylation
Hydroxylation[Exact Match]									Hydroxylation[±2]
	P00740	FA9_HUMAN	hemophilia b	VAR_006551	p.Asp110Asn					P00740	FA9_HUMAN	hemophilia b	VAR_006550	p.Cys108Ser
	Q15485	FCN2_HUMAN	colorectal cancer	VAR_036342	p.Pro80Leu					P00740	FA9_HUMAN	hemophilia b	VAR_006551	p.Asp110Asn
										P00740	FA9_HUMAN	hemophilia b	VAR_006552	p.Ile112Ser
										P02452	CO1A1_HUMAN	osteogenesis imperfecta 1	VAR_001646	p.Gly263Arg
										P02452	CO1A1_HUMAN	osteogenesis imperfecta 1	VAR_001647	p.Gly263Val
										P02452	CO1A1_HUMAN	osteogenesis imperfecta 1	VAR_063298	p.Gly266Glu
										P02461	CO3A1_HUMAN	ehlers-danlos syndrome 4	VAR_001797	p.Gly1104Ala
										P02461	CO3A1_HUMAN	ehlers-danlos syndrome 4	VAR_011111	p.Gly264Arg
										P02747	C1QC_HUMAN	complement component c1q deficiency	VAR_008542	p.Gly34Arg
										P04070	PROC_HUMAN	thrombophilia	VAR_006651	p.Gly114Arg
										P08709	FA7_HUMAN	factor vii deficiency	VAR_014407	p.Cys121Phe
										P08709	FA7_HUMAN	factor vii deficiency	VAR_014408	p.Leu125Pro
										P15502	ELN_HUMAN		VAR_020882	p.Gly422Ser
										P16157	ANK1_HUMAN	spherocytosis 1	VAR_000596	p.Val463Ile
										P20908	CO5A1_HUMAN	renal cell carcinoma case	VAR_064702	p.Pro908Leu
										Q02388	CO7A1_HUMAN	epidermolysis bullosa dystrophica, pretibial type	VAR_001832	p.Gly2623Cys
										Q02388	CO7A1_HUMAN	epidermolysis bullosa dystrophica, autosomal recessive	VAR_001834	p.Gly2671Val
										Q02388	CO7A1_HUMAN	epidermolysis bullosa dystrophica, autosomal recessive	VAR_001835	p.Gly2674Arg
										Q02388	CO7A1_HUMAN	epidermolysis bullosa dystrophica, autosomal recessive	VAR_011196	p.Gly2674Asp
										Q15485	FCN2_HUMAN	colorectal cancer	VAR_036342	p.Pro80Leu

## Sheet: Sulfation
Sulfation[Exact Match]											Sulfation[±2]
	P00451	FA8_HUMAN	hemophilia a	VAR_001138	p.Tyr1699Cys							P00451	FA8_HUMAN	hemophilia a	VAR_028605	p.Ile1698Thr
	P00451	FA8_HUMAN	hemophilia a	VAR_001139	p.Tyr1699Phe							P00451	FA8_HUMAN	hemophilia a	VAR_001138	p.Tyr1699Cys
	P00451	FA8_HUMAN	hemophilia a	VAR_028521	p.Tyr365Cys							P00451	FA8_HUMAN	hemophilia a	VAR_001139	p.Tyr1699Phe
	P00451	FA8_HUMAN	hemophilia a	VAR_028598	p.Tyr742Cys							P00451	FA8_HUMAN	hemophilia a	VAR_028606	p.Glu1701Lys
												P00451	FA8_HUMAN	hemophilia a	VAR_028521	p.Tyr365Cys
												P00451	FA8_HUMAN	hemophilia a	VAR_001134	p.Glu739Lys
												P00451	FA8_HUMAN	hemophilia a	VAR_028598	p.Tyr742Cys
