# Supplementary material for: Nonsynonymous Single-Nucleotide Variations on Some Posttranslational Modifications of Human Proteins and the Association with Diseases
Source: Comput Math Methods Med. 2015 Oct 1;2015:124630. doi: 10.1155/2015/124630 (PMC4606098; doi:10.1155/2015/124630)
Supplement: Supplementary file 1 — Supplementary Table S1: The proteins and their sites of exact matched nsSNVs on each type of PTM. The proteins were shown with their UniProt Accession number. Supplementary Table S2: The information of damaged PTM sites associated diseases annotated by SwissVar. For each type of PTM, the information of associated diseases for the exact matched and around matched PTM sites were given. The alterations between the modified amino acids of one type of PTM marked in red. Supplementary Table S3: Enrichment results of keywords and GO. Both exact matched and ±2 matched results were shown. Inherited diseases were marked in yellow and cancers were marked in green. Supplementary Table S4: Pathway analysis based on IPA. The results were boxed for each type of PTM, and the analysis were performed for both inherited diseases and cancers. P value and the ratio calculated based on IPA were shown. Supplementary Table S5: Summary of biomarker candidates. The biomarker candidates were chosen based on information from IPA and details about them were shown. [file 124630.f1.zip › mat.124630.v2/Table S3.xls]

## Sheet: 工作表1
Keyword enrichment							GO enrichment
	Exact match	±2 match		Exact match	±2 match			Exact match	±2 match		Exact match	±2 match
	Disease-mutation	Disease-mutation		Phosphoprotein	Phosphoprotein			Transmembrane receptor protein tyrosine kinase signaling pathway	Homeostatic process		Protein amino acid phosphorylation	Protein amino acid phosphorylation
Phosphorylation	Phosphorprotein	Phosphopretein		Acetylation	Acetylation			Response to organic substance	Regulation of programmed cell death		Phosphorylation	Phosphorylation
	Tumor suppressor	Atp-binding		Nucleus	Nucleus			Regulation of apoptosis	Regulation of cell death		Phosphorus metabolic process	Chromosome organization
	Ubl conjugation	Kinase		Cytoplasm	Cytoplasm			Regulation of programmed cell death	Protein amino acid phosphorylation		Phosphate metabolic process	Phosphorus metabolic process
	Atp-binding	Nucleotide-binding		Atp-binding	Atp-binding			Regulation of cell death	Regulation of apoptosis		Cell cycle	Phosphate metabolic process
	Exact match	±2 match		Exact match	±2 match			Exact match	±2 match		Exact match	±2 match
	Disease-mutation	Disease-mutation		Acetylation	Acetylation			Chrodate embryonic development	Response to organic substance		Modification-dependent protein catabolic process	Proteolysis involved in cellular protein catabolic process
Ubiquitylation	Tumor suppressor	Acetylation		Phophoprotein	Phophoprotein			Embryonic development ending in birth or egg hatching	Response to abiotic stimulus		Modification-dependent macromolecule catabolic process	Modification-dependent protein catabolic process
	Acetylation	Phosphoprotein		Cytoplasm	Cytoplasm			Negative regulation of cell proliferation	Double-strand break repair		Proteolysis involved in cellular protein catabolic process	Modification-dependent macromolecule catabolic process
	Phosphoprotein	Acetylated amino end		Isopeptide bond	Ubl conjugation			Response to endogenous stimulus	Response to endogenous stimulus		Cellular protein catabolic process	Cellular protein catabolic process
	Membrane protein	Intermediate filament		Ubl conjugation	Nucleotide-binding			Regulation of cell proliferation	Response to radiation		Cellular macromolecule catabolic process	Cellular macromolecule catabolic process
	Exact match	±2 match		Exact match	±2 match			Exact match	±2 match		Exact match	±2 match
	Disease mutation	Disease mutation		Acetylation	Acetylation			Oxygen transport	Muscle organ development		Nucleosome assembly	Chromosome organization
Acetylation	Acetylation	Acetylation		Phosphorprotein	Phosphorprotein			Response to X-ray	Response to organic substance		Chromatin assembly or disassembly	Chromatin organization
	Homotetramer	Phosphoprotein		Chromosomal protein	Nucleus			DNA damage response,signal transduction	Striated muscle tissue development		Chromatin assembly	Chromatin assembly or disassembly
	Phosphoprotein	Acetylated amino end		Nucleosome core	Cytoplasm			Gas transport	Muscle tissue development		Protein-DNA complex assembly	RNA processing
	Erythrocyte	Nucleotide-binding		Ubl conjugation	Nucletide-binding			Development of primary sexual characteristics	Response to inorganic substance		Nucleosome organization	Translation
	Exact match	±2 match		Exact match	±2 match			Exact match	±2 match		Exact match	±2 match
	Disease mutation	Disease mutation		Glycoprotein	Glycoprotein			Coagulation	Coagulation		Regulation of system process	Extracellular region
Glycosylation	Glycoprotein	Glycoprotein		Signal	Signal			Blood coagulation	Blood coagulation		Iinflammatory response	Extracellular region part
	Signal	Signal		Disulfide bond	Disulfide bond			Hemostasis	Hemostasis		Cell adhesion	Extracellular space
	Plasma	Disulfide bond		Transmembrane protein	Secreted			Regulation of body fluid levels	Regulation of body fluid levels		Biological adhesion	Intrinsic to plasma membrane
	Blood coagulation	Plasma		Transmembrane	Transmembrane protein			Wound healing	Wound healing		Regulation of synaptic transmission	Integral to plasma membrane
Yellow indicates inherited disease, green indicates cancer
