# Supplementary material for: Nonsynonymous Single-Nucleotide Variations on Some Posttranslational Modifications of Human Proteins and the Association with Diseases
Source: Comput Math Methods Med. 2015 Oct 1;2015:124630. doi: 10.1155/2015/124630 (PMC4606098; doi:10.1155/2015/124630)
Supplement: Supplementary file 1 — Supplementary Table S1: The proteins and their sites of exact matched nsSNVs on each type of PTM. The proteins were shown with their UniProt Accession number. Supplementary Table S2: The information of damaged PTM sites associated diseases annotated by SwissVar. For each type of PTM, the information of associated diseases for the exact matched and around matched PTM sites were given. The alterations between the modified amino acids of one type of PTM marked in red. Supplementary Table S3: Enrichment results of keywords and GO. Both exact matched and ±2 matched results were shown. Inherited diseases were marked in yellow and cancers were marked in green. Supplementary Table S4: Pathway analysis based on IPA. The results were boxed for each type of PTM, and the analysis were performed for both inherited diseases and cancers. P value and the ratio calculated based on IPA were shown. Supplementary Table S5: Summary of biomarker candidates. The biomarker candidates were chosen based on information from IPA and details about them were shown. [file 124630.f1.zip › mat.124630.v2/Table S4.xlsx]

## Sheet: 工作表1
	INHERITED-DISEASE	P value	Ratio			CANCER	P value	Ratio
	Ovarian cancer signaling	9.57e-15	17/130(0.131)			Molecular mechanisms of cancer	4.87e-25	109/359(0.3)
	Molecular Mechanism of cancer	1.25e-14	25/359(0.07)			Protein kinase A signaling	1.12e-18	99/368(0.269)
Phosphorylation	Regulation of the Epithelial-Mesenchymal transition pathway	2.6e-12	17/182(0.093)			NGF signaling	1.95e-16	44/106(0.415)
	Role of BRAC1 in DNA damage response	1.55e-11	11/61(0.18)			Insulin receptor signaling	1.05e-15	48/128(0.375)
	Hereditary breast cancer signaling	6.94e-11	13/112(0.116)			PI3K/AKT signaling	2.26e-15	46/121(0.38)
	Hereditary breast cancer signaling	2.73e-09	7/112(0.062)			Protein ubiquitylation pathway	2.3e-13	34/254(0.134)
	Ovarian cancer signaling	2.53e-07	6/130(0.046)			Remodeling of Epithelial adherens junctions	7.05e-11	16/66(0.242)
Ubiquitylation	PI3K/AKT signaling	4.77e-06	5/121(0.041)			EIF2 signaling	4.83e-08	21/172(0.122)
	Role of BRAC1 in DNA damage response	7.44e-06	4/61(0.066)			Epithelial adherens junction signaling	5.38e-08	19/143(0.133)
	Glioblastoma Multiforme signaling	1.15e-05	5/145(0.034)			Cell cycle:G2/M DNA damage checkpoint regulation	1.61e-07	11/49(0.224)
	Hereditary breast cancer signaling	1.57e-05	4/112(0.036)			Granzyme A signaling	5.48e-07	5/17(0.294)
	Ovarian cancer signaling	2.83e-05	4/130(0.031)			Protein kinase A signaling	2.22e-05	14/368(0.038)
Acetylation	Role of BRAC1 in DNA damage response	7.9e-05	3/61(0.049)			Remodeling of epithelial adherens junctions	5.27e-05	6/66(0.091)
	citrulline degradation	0.00138	1/1(1)			Actin cytoskeleton signaling	5.42e-05	10/210(0.048)
	Colorectal cancer metasis signaling	0.00382	3/231(0.013)			p53 signaling	5.96e-05	7/98(0.071)
	Coagulation system	7.31e-12	6/35(0.171)			Complement system	3.02e-06	4/32(0.125)
	Extrinsic Prothrombin activation pathway	5.99e-09	4/16(0.25)			Agrin interactions at neuromuscular junction	5.93e-05	4/67(0.06)
Glycosylation	Intrinsic prothrombin activation pathway	6.66e-08	4/28(0.143)			PTEN signaling	0.000527	4/118(0.034)
	Crosstalk between dendritic cells and natural killer cells	7.48e-06	4/89(0.045)			STAT3 pathway	0.00159	3/73(0.041)
	Cytotoxic T lymphocyte-mediated apoptosis of target cells	1.15e-05	3.31(0.097)			CDK5 signaling	0.00369	3/98(0.031)
	ATM signaling	2.06e-06	3/59(0.051)			Estrogen receptor signaling	6.23e-10	8/127(0.063)
	Hereditary breast cancer signaling	1.42e-05	3/112(0.027)			Granzyme A signaling	6.85e-08	4/17(0.235)
Methylation	Cell cycle:G2/M DNA damage checkpoint regulation	0.000216	2/49(0.041)			ATM signaling	1.22e-05	4/59(0.068)
	Role of CHK proteins in cell cycle checkpoint control	0.000272	2/55(0.036)			Aryl hydrocarbon receptor signaling	1.77e-05	5/135(0.037)
	Role of BRCA1 inDNA damage response	0.000335	2/61(0.033)			Glucocorticoid receptor signaling	3.38e-05	6/258(0.023)
	Docosahexaenoic acid (DHA) signaling	0.00224	1/39(0.026)			Estrogen-dependent breast cancer signaling	0.00252	2/62(0.032)
	Neuroprotective role of THOP1 in Alzheimer's disease	0.0023	1/40(0.025)			Hypoxia signaling in the cardiovascular system	0.0026	2/63(0.032)
SUMOylation	Amyloid processing	0.00288	1/50(0.02)			Mitochondrial dysfunction	0.0167	2/165(0.012)
	Reelin signaling in Neurons	0.00455	1/79(0.013)			Parkinson's signaling	0.0192	1/16(0.062)
	Mitochondrial dysfunction	0.00949	1/165(0.006)			Estrogen-mediated S-phase entry	0.0286	1/24(0.042)
Hydroxylation	Intrinsic prothrombin activation pathway	0.00322	1/28(0.036)			Hepatic fibrosis/Hepatic stellate cell activation	7.59e-05	3/196(0.015)
	Coagulation system	0.00402	1/35(0.029)			Complement system	9.13e-05	2/32(0.062)
						Role of pattern recognition receptors in recognition of bacteria and viruses	0.00127	2/119(0.017)
						TR/RXR activation	0.0385	1/85(0.012)
						Gαs signaling	0.0487	1/108(0.009)
	Pathogenesis of multiple sclerosis	0.00104	1/9(0.111)
	Intrinsic prothrombin activation pathway	0.00322	1/28(0.036)
Sulfation	Coagulation system	0.00402	1/35(0.029)
	Role of hypercytokinemia/hyperchemokinemia in the pathogenesis of influenza	0.00471	1/41(0.024)
	Role of PI3K/AKT signaling in the pathogenesis of influenza	0.00701	1/61(0.016)
