# Supplementary material for: Nonsynonymous Single-Nucleotide Variations on Some Posttranslational Modifications of Human Proteins and the Association with Diseases
Source: Comput Math Methods Med. 2015 Oct 1;2015:124630. doi: 10.1155/2015/124630 (PMC4606098; doi:10.1155/2015/124630)
Supplement: Supplementary file 1 — Supplementary Table S1: The proteins and their sites of exact matched nsSNVs on each type of PTM. The proteins were shown with their UniProt Accession number. Supplementary Table S2: The information of damaged PTM sites associated diseases annotated by SwissVar. For each type of PTM, the information of associated diseases for the exact matched and around matched PTM sites were given. The alterations between the modified amino acids of one type of PTM marked in red. Supplementary Table S3: Enrichment results of keywords and GO. Both exact matched and ±2 matched results were shown. Inherited diseases were marked in yellow and cancers were marked in green. Supplementary Table S4: Pathway analysis based on IPA. The results were boxed for each type of PTM, and the analysis were performed for both inherited diseases and cancers. P value and the ratio calculated based on IPA were shown. Supplementary Table S5: Summary of biomarker candidates. The biomarker candidates were chosen based on information from IPA and details about them were shown. [file 124630.f1.zip › mat.124630.v2/Table S5.xls]

## Sheet: Phosphorylation
Symbol	Entrez Gene Name	Location	Family	Drug(s)	GenPept/UniProt/Swiss-Prot Accession	Human	Biomarker Application(s)	Diseases
ABCA4	ATP-binding cassette, sub-family A (ABC1), member 4	Plasma Membrane	transporter		P78363	x	unspecified application	Cancer, Hereditary Disorder, Ophthalmic Disease, Organismal Injury and Abnormalities, Reproductive System Disease
ABCB1	ATP-binding cassette, sub-family B (MDR/TAP), member 1	Plasma Membrane	transporter	dofequidar, tariquidar, OC 144-093, valspodar	P08183	x	efficacy,prognosis,response to therapy	Auditory Disease, Cancer, Cardiovascular Disease, Connective Tissue Disorders, Gastrointestinal Disease, Hematological Disease, Hepatic System Disease, Hereditary Disorder, Immunological Disease, Infectious Disease, Inflammatory Disease, Inflammatory Response, Neurological Disease, Organismal Injury and Abnormalities, Psychological Disorders, Reproductive System Disease, Respiratory Disease, Skel…
ABCC1	ATP-binding cassette, sub-family C (CFTR/MRP), member 1	Plasma Membrane	transporter	sulfinpyrazone	P33527	x	prognosis	Cancer, Cardiovascular Disease, Connective Tissue Disorders, Dermatological Diseases and Conditions, Developmental Disorder, Gastrointestinal Disease, Hematological Disease, Hepatic System Disease, Hereditary Disorder, Hypersensitivity Response, Immunological Disease, Infectious Disease, Inflammatory Disease, Inflammatory Response, Metabolic Disease, Neurological Disease, Organismal Injury and Ab…
ABCC3	ATP-binding cassette, sub-family C (CFTR/MRP), member 3	Plasma Membrane	transporter		O15438	x	diagnosis,prognosis	Cancer, Developmental Disorder, Endocrine System Disorders, Gastrointestinal Disease, Hematological Disease, Hepatic System Disease, Hereditary Disorder, Immunological Disease, Inflammatory Disease, Metabolic Disease, Neurological Disease, Organismal Injury and Abnormalities
ABCC4	ATP-binding cassette, sub-family C (CFTR/MRP), member 4	Plasma Membrane	transporter		O15439	x	prognosis	Cancer, Cardiovascular Disease, Developmental Disorder, Gastrointestinal Disease, Hepatic System Disease, Immunological Disease, Inflammatory Disease, Inflammatory Response, Nutritional Disease, Organismal Injury and Abnormalities, Reproductive System Disease
ABCC5	ATP-binding cassette, sub-family C (CFTR/MRP), member 5	Plasma Membrane	transporter		O15440	x	response to therapy	Cancer, Gastrointestinal Disease, Hepatic System Disease, Inflammatory Disease, Neurological Disease, Organismal Injury and Abnormalities, Reproductive System Disease
ABL1	c-abl oncogene 1, non-receptor tyrosine kinase	Nucleus	kinase	nilotinib, saracatinib, regorafenib, ponatinib, cyclophosphamide/daunorubicin/imatinib/prednisone/vincristine, bosutinib, imatinib, temozolomide	P00519	x	efficacy,response to therapy,unspecified application	Cancer, Cardiovascular Disease, Connective Tissue Disorders, Dermatological Diseases and Conditions, Developmental Disorder, Gastrointestinal Disease, Hematological Disease, Hepatic System Disease, Immunological Disease, Infectious Disease, Inflammatory Disease, Inflammatory Response, Neurological Disease, Nutritional Disease, Ophthalmic Disease, Organismal Injury and Abnormalities, Renal and Uro…
ACAA2	acetyl-CoA acyltransferase 2	Cytoplasm	enzyme		P42765	x	unspecified application	Cancer, Developmental Disorder, Gastrointestinal Disease, Hereditary Disorder, Organismal Injury and Abnormalities, Renal and Urological Disease
ACAT1	acetyl-CoA acetyltransferase 1	Cytoplasm	enzyme		P24752	x	unspecified application	Cancer, Cardiovascular Disease, Developmental Disorder, Hereditary Disorder, Inflammatory Response, Metabolic Disease, Neurological Disease, Organismal Injury and Abnormalities, Psychological Disorders, Renal and Urological Disease, Skeletal and Muscular Disorders
ACLY	ATP citrate lyase	Cytoplasm	enzyme		P53396	x	unspecified application	Cancer, Connective Tissue Disorders, Gastrointestinal Disease, Immunological Disease, Inflammatory Disease, Metabolic Disease, Neurological Disease, Psychological Disorders, Skeletal and Muscular Disorders
ACTA2	actin, alpha 2, smooth muscle, aorta	Cytoplasm	other		P62736	x	efficacy	Cancer, Cardiovascular Disease, Connective Tissue Disorders, Dermatological Diseases and Conditions, Developmental Disorder, Endocrine System Disorders, Gastrointestinal Disease, Hereditary Disorder, Immunological Disease, Inflammatory Disease, Metabolic Disease, Neurological Disease, Ophthalmic Disease, Organismal Injury and Abnormalities, Psychological Disorders, Reproductive System Disease, Re…
ACTG1	actin, gamma 1	Cytoplasm	other		P63261	x	unspecified application	Auditory Disease, Cancer, Developmental Disorder, Gastrointestinal Disease, Hematological Disease, Hepatic System Disease, Hereditary Disorder, Immunological Disease, Neurological Disease, Ophthalmic Disease
ACTN2	actinin, alpha 2	Nucleus	transcription regulator		P35609	x	unspecified application	Cancer, Cardiovascular Disease, Hereditary Disorder, Neurological Disease, Organismal Injury and Abnormalities, Psychological Disorders, Reproductive System Disease, Respiratory Disease, Skeletal and Muscular Disorders
ACTN3	actinin, alpha 3	Plasma Membrane	other		Q08043	x	unspecified application	Cancer, Hereditary Disorder, Neurological Disease, Psychological Disorders, Skeletal and Muscular Disorders
ACTR3	ARP3 actin-related protein 3 homolog (yeast)	Plasma Membrane	other		P61158	x	diagnosis	Cancer, Organismal Injury and Abnormalities, Reproductive System Disease
ADRB2	adrenoceptor beta 2, surface	Plasma Membrane	G-protein coupled receptor	articaine/epinephrine, bupivacaine/epinephrine, carteolol, dipivefrin, meluadrine, epinephrine/prilocaine, epinephrine/lidocaine, bedoradrine, KUL 7211, arformoterol, indacaterol, PYM-50018, budesonide/formoterol, nebivolol, vilanterol, formoterol/mometasone furoate, glycopyrrolate/indacaterol, latanoprost/timolol, umeclidinium/vilanterol, fluticasone/salmeterol, albuterol/ipratropium, carvedilol…	P07550	x	diagnosis,efficacy,unspecified application	Cancer, Cardiovascular Disease, Connective Tissue Disorders, Dermatological Diseases and Conditions, Developmental Disorder, Endocrine System Disorders, Gastrointestinal Disease, Hematological Disease, Hepatic System Disease, Hereditary Disorder, Immunological Disease, Infectious Disease, Inflammatory Disease, Inflammatory Response, Metabolic Disease, Neurological Disease, Nutritional Disease, Op…
ADRM1	adhesion regulating molecule 1	Plasma Membrane	other		Q16186	x	unspecified application	Cancer, Organismal Injury and Abnormalities, Reproductive System Disease
AFAP1	actin filament associated protein 1	Cytoplasm	other		Q8N556	x	disease progression	Cancer, Organismal Injury and Abnormalities, Reproductive System Disease
AGER	advanced glycosylation end product-specific receptor	Plasma Membrane	transmembrane receptor		Q15109	x	diagnosis,efficacy,unspecified application	Antimicrobial Response, Cancer, Cardiovascular Disease, Connective Tissue Disorders, Dermatological Diseases and Conditions, Developmental Disorder, Endocrine System Disorders, Gastrointestinal Disease, Hematological Disease, Hepatic System Disease, Immunological Disease, Infectious Disease, Inflammatory Disease, Inflammatory Response, Metabolic Disease, Neurological Disease, Nutritional Disease,…
AHI1	Abelson helper integration site 1	Cytoplasm	other		Q8N157	x	unspecified application	Cancer, Connective Tissue Disorders, Developmental Disorder, Endocrine System Disorders, Gastrointestinal Disease, Hematological Disease, Hereditary Disorder, Immunological Disease, Inflammatory Disease, Metabolic Disease, Neurological Disease, Nutritional Disease, Organismal Injury and Abnormalities, Psychological Disorders, Renal and Urological Disease, Skeletal and Muscular Disorders
AIM1	absent in melanoma 1	Extracellular Space	other		Q9Y4K1	x	diagnosis,disease progression,prognosis	Cancer, Dermatological Diseases and Conditions, Gastrointestinal Disease, Organismal Injury and Abnormalities, Renal and Urological Disease, Reproductive System Disease
AK1	adenylate kinase 1	Cytoplasm	kinase		P00568	x	unspecified application	Hematological Disease, Hereditary Disorder, Neurological Disease, Psychological Disorders, Respiratory Disease, Skeletal and Muscular Disorders
AKAP12	A kinase (PRKA) anchor protein 12	Cytoplasm	transporter		Q02952	x	unspecified application	Cancer, Gastrointestinal Disease, Hepatic System Disease, Inflammatory Disease, Inflammatory Response, Neurological Disease, Organismal Injury and Abnormalities, Reproductive System Disease, Respiratory Disease
AKR1B10	aldo-keto reductase family 1, member B10 (aldose reductase)	Cytoplasm	enzyme		O60218	x	unspecified application	Cancer, Dermatological Diseases and Conditions, Gastrointestinal Disease, Hepatic System Disease, Inflammatory Disease, Respiratory Disease
AKR7A2	aldo-keto reductase family 7, member A2 (aflatoxin aldehyde reductase)	Cytoplasm	enzyme		O43488	x	diagnosis	Cancer, Organismal Injury and Abnormalities, Reproductive System Disease
AKT3	v-akt murine thymoma viral oncogene homolog 3	Cytoplasm	kinase	enzastaurin	Q9Y243	x	efficacy	Cancer, Cardiovascular Disease, Developmental Disorder, Endocrine System Disorders, Hematological Disease, Hereditary Disorder, Immunological Disease, Inflammatory Response, Metabolic Disease, Neurological Disease, Organismal Injury and Abnormalities, Reproductive System Disease
AKT1S1	AKT1 substrate 1 (proline-rich)	Cytoplasm	other		Q96B36	x	efficacy	Cancer, Developmental Disorder
ALDH2	aldehyde dehydrogenase 2 family (mitochondrial)	Cytoplasm	enzyme	disulfiram, chlorpropamide	P05091	x	unspecified application	Cancer, Cardiovascular Disease, Endocrine System Disorders, Gastrointestinal Disease, Hematological Disease, Hereditary Disorder, Immunological Disease, Inflammatory Disease, Inflammatory Response, Metabolic Disease, Neurological Disease, Organismal Injury and Abnormalities, Psychological Disorders, Respiratory Disease, Skeletal and Muscular Disorders
ALDH3A1	aldehyde dehydrogenase 3 family, member A1	Cytoplasm	enzyme		P30838	x	diagnosis,unspecified application	Cancer, Endocrine System Disorders, Inflammatory Disease, Ophthalmic Disease, Organismal Injury and Abnormalities, Renal and Urological Disease, Reproductive System Disease, Respiratory Disease
ALDOA	aldolase A, fructose-bisphosphate	Cytoplasm	enzyme		P04075	x	unspecified application	Cancer, Connective Tissue Disorders, Developmental Disorder, Hematological Disease, Hereditary Disorder, Immunological Disease, Inflammatory Disease, Inflammatory Response, Organismal Injury and Abnormalities, Reproductive System Disease, Respiratory Disease, Skeletal and Muscular Disorders
ALPP	alkaline phosphatase, placental	Plasma Membrane	phosphatase		P05187	x	diagnosis,unspecified application	Cancer, Dermatological Diseases and Conditions, Developmental Disorder, Endocrine System Disorders, Gastrointestinal Disease, Hepatic System Disease, Hypersensitivity Response, Infectious Disease, Inflammatory Disease, Inflammatory Response, Organismal Injury and Abnormalities, Reproductive System Disease, Respiratory Disease
ANKRD11	ankyrin repeat domain 11	Nucleus	other		Q6UB99	x	unspecified application	Cancer, Connective Tissue Disorders, Dental Disease, Dermatological Diseases and Conditions, Developmental Disorder, Gastrointestinal Disease, Hereditary Disorder, Neurological Disease, Psychological Disorders, Skeletal and Muscular Disorders
ANTXR2	anthrax toxin receptor 2	Plasma Membrane	transmembrane receptor		P58335	x	diagnosis	Cancer, Cardiovascular Disease, Connective Tissue Disorders, Gastrointestinal Disease, Hereditary Disorder, Infectious Disease, Organismal Injury and Abnormalities, Reproductive System Disease
ANXA1	annexin A1	Plasma Membrane	other	hydrocortisone, hydrocortisone/prednisone, hydrocortisone/mitoxantrone, docetaxel/hydrocortisone	P04083	x	diagnosis,prognosis,unspecified application	Cancer, Cardiovascular Disease, Connective Tissue Disorders, Dermatological Diseases and Conditions, Developmental Disorder, Endocrine System Disorders, Gastrointestinal Disease, Hematological Disease, Hepatic System Disease, Hypersensitivity Response, Immunological Disease, Infectious Disease, Inflammatory Disease, Inflammatory Response, Metabolic Disease, Neurological Disease, Ophthalmic Diseas…
ANXA2	annexin A2	Plasma Membrane	other		P07355	x	diagnosis,unspecified application	Cancer, Cardiovascular Disease, Dermatological Diseases and Conditions, Gastrointestinal Disease, Hematological Disease, Hepatic System Disease, Immunological Disease, Infectious Disease, Inflammatory Response, Neurological Disease, Organismal Injury and Abnormalities, Psychological Disorders, Renal and Urological Disease, Reproductive System Disease, Respiratory Disease, Skeletal and Muscular Di…
AP3B1	adaptor-related protein complex 3, beta 1 subunit	Cytoplasm	transporter		O00203	x	diagnosis	Cancer, Dermatological Diseases and Conditions, Developmental Disorder, Hereditary Disorder, Inflammatory Response, Metabolic Disease, Ophthalmic Disease, Organismal Injury and Abnormalities, Reproductive System Disease
APBA2	amyloid beta (A4) precursor protein-binding, family A, member 2	Cytoplasm	transporter		Q99767	x	disease progression	Cancer, Gastrointestinal Disease, Hereditary Disorder, Neurological Disease, Organismal Injury and Abnormalities, Psychological Disorders, Reproductive System Disease
APC	adenomatous polyposis coli	Nucleus	enzyme		P25054	x	diagnosis,disease progression,efficacy,prognosis,safety	Cancer, Connective Tissue Disorders, Dermatological Diseases and Conditions, Endocrine System Disorders, Gastrointestinal Disease, Hematological Disease, Hepatic System Disease, Hereditary Disorder, Immunological Disease, Neurological Disease, Organismal Injury and Abnormalities, Psychological Disorders, Renal and Urological Disease, Reproductive System Disease, Respiratory Disease, Skeletal and …
APCS	amyloid P component, serum	Extracellular Space	other		P02743	x	unspecified application	Cancer, Cardiovascular Disease, Connective Tissue Disorders, Developmental Disorder, Gastrointestinal Disease, Hematological Disease, Hereditary Disorder, Immunological Disease, Infectious Disease, Inflammatory Disease, Inflammatory Response, Metabolic Disease, Neurological Disease, Nutritional Disease, Ophthalmic Disease, Organismal Injury and Abnormalities, Renal and Urological Disease, Respira…
APOA1	apolipoprotein A-I	Extracellular Space	transporter		P02647	x	diagnosis,efficacy,unspecified application	Cancer, Cardiovascular Disease, Connective Tissue Disorders, Dermatological Diseases and Conditions, Developmental Disorder, Endocrine System Disorders, Gastrointestinal Disease, Hematological Disease, Hepatic System Disease, Hereditary Disorder, Immunological Disease, Inflammatory Disease, Inflammatory Response, Metabolic Disease, Neurological Disease, Nutritional Disease, Ophthalmic Disease, Or…
APOB	apolipoprotein B	Extracellular Space	transporter	mipomersen	P04114	x	diagnosis,efficacy	Cancer, Cardiovascular Disease, Connective Tissue Disorders, Dermatological Diseases and Conditions, Developmental Disorder, Endocrine System Disorders, Gastrointestinal Disease, Hematological Disease, Hepatic System Disease, Hereditary Disorder, Infectious Disease, Inflammatory Disease, Inflammatory Response, Metabolic Disease, Neurological Disease, Nutritional Disease, Organismal Injury and Abn…
APOE	apolipoprotein E	Extracellular Space	transporter		P02649	x	diagnosis,efficacy,prognosis,unspecified application	Auditory Disease, Cancer, Cardiovascular Disease, Connective Tissue Disorders, Dermatological Diseases and Conditions, Developmental Disorder, Endocrine System Disorders, Gastrointestinal Disease, Hematological Disease, Hepatic System Disease, Hereditary Disorder, Immunological Disease, Infectious Disease, Inflammatory Disease, Inflammatory Response, Metabolic Disease, Neurological Disease, Nutri…
APP	amyloid beta (A4) precursor protein	Plasma Membrane	other	bapineuzumab, florbetapir F18	P05067	x	diagnosis,efficacy,unspecified application	Cancer, Cardiovascular Disease, Dermatological Diseases and Conditions, Developmental Disorder, Endocrine System Disorders, Gastrointestinal Disease, Hematological Disease, Hepatic System Disease, Hereditary Disorder, Immunological Disease, Infectious Disease, Inflammatory Disease, Inflammatory Response, Metabolic Disease, Neurological Disease, Nutritional Disease, Ophthalmic Disease, Organismal …
AR	androgen receptor	Nucleus	ligand-dependent nuclear receptor	estradiol valerate/testosterone enanthate, estradiol cypionate/testosterone cypionate, BMS-641988, cyproterone acetate/ethinyl estradiol, enzalutamide, 1-testosterone, flutamide/goserelin, drospirenone/ethinyl estradiol, nilutamide, bicalutamide, flutamide, nandrolone decanoate, testosterone cypionate, cyproterone acetate, drospirenone, medroxyprogesterone acetate, oxandrolone, danazol, dihydrote…	P10275	x	diagnosis,disease progression,efficacy	Cancer, Cardiovascular Disease, Connective Tissue Disorders, Dermatological Diseases and Conditions, Developmental Disorder, Endocrine System Disorders, Gastrointestinal Disease, Hematological Disease, Hepatic System Disease, Hereditary Disorder, Immunological Disease, Infectious Disease, Inflammatory Disease, Inflammatory Response, Metabolic Disease, Neurological Disease, Nutritional Disease, Op…
ARHGDIA	Rho GDP dissociation inhibitor (GDI) alpha	Cytoplasm	other		P52565	x	unspecified application	Cancer, Cardiovascular Disease, Dermatological Diseases and Conditions, Developmental Disorder, Endocrine System Disorders, Gastrointestinal Disease, Hematological Disease, Hereditary Disorder, Hypersensitivity Response, Immunological Disease, Inflammatory Disease, Inflammatory Response, Metabolic Disease, Organismal Injury and Abnormalities, Renal and Urological Disease, Reproductive System Dise…
ARHGDIB	Rho GDP dissociation inhibitor (GDI) beta	Cytoplasm	other		P52566	x	diagnosis	Cancer, Cardiovascular Disease, Connective Tissue Disorders, Dermatological Diseases and Conditions, Developmental Disorder, Endocrine System Disorders, Hypersensitivity Response, Immunological Disease, Infectious Disease, Inflammatory Disease, Inflammatory Response, Neurological Disease, Organismal Injury and Abnormalities, Psychological Disorders, Reproductive System Disease, Skeletal and Muscu…
ARHGEF1	Rho guanine nucleotide exchange factor (GEF) 1	Cytoplasm	other		Q92888	x	unspecified application	Cancer, Cardiovascular Disease, Hereditary Disorder, Inflammatory Response, Neurological Disease, Psychological Disorders, Skeletal and Muscular Disorders
ATF2	activating transcription factor 2	Nucleus	transcription regulator		P15336	x	prognosis	Cancer, Connective Tissue Disorders, Dermatological Diseases and Conditions, Developmental Disorder, Gastrointestinal Disease, Hematological Disease, Hereditary Disorder, Infectious Disease, Inflammatory Response, Neurological Disease, Organismal Injury and Abnormalities, Psychological Disorders, Reproductive System Disease, Respiratory Disease, Skeletal and Muscular Disorders
AURKA	aurora kinase A	Nucleus	kinase	tozasertib, MLN8054, danusertib	O14965	x	efficacy	Cancer, Developmental Disorder, Gastrointestinal Disease, Hematological Disease, Hepatic System Disease, Immunological Disease, Organismal Injury and Abnormalities, Renal and Urological Disease, Reproductive System Disease, Respiratory Disease
BAD	BCL2-associated agonist of cell death	Cytoplasm	other		Q92934	x	efficacy	Cancer, Connective Tissue Disorders, Developmental Disorder, Endocrine System Disorders, Gastrointestinal Disease, Hematological Disease, Hereditary Disorder, Immunological Disease, Inflammatory Disease, Inflammatory Response, Metabolic Disease, Neurological Disease, Organismal Injury and Abnormalities, Renal and Urological Disease, Reproductive System Disease, Skeletal and Muscular Disorders
BCAR1	breast cancer anti-estrogen resistance 1	Plasma Membrane	enzyme		P56945	x	prognosis	Cancer, Cardiovascular Disease, Developmental Disorder, Infectious Disease, Inflammatory Response, Organismal Injury and Abnormalities, Reproductive System Disease
BCL2	B-cell CLL/lymphoma 2	Cytoplasm	transporter	oblimersen, rasagiline, (-)-gossypol, gemcitabine/paclitaxel, bortezomib/paclitaxel, paclitaxel/trastuzumab, paclitaxel/pertuzumab/trastuzumab, lapatinib/paclitaxel, paclitaxel	P10415	x	diagnosis,efficacy,prognosis	Cancer, Cardiovascular Disease, Connective Tissue Disorders, Dermatological Diseases and Conditions, Developmental Disorder, Endocrine System Disorders, Gastrointestinal Disease, Hematological Disease, Hepatic System Disease, Hereditary Disorder, Immunological Disease, Infectious Disease, Inflammatory Disease, Inflammatory Response, Metabolic Disease, Neurological Disease, Nutritional Disease, Op…
BCR	breakpoint cluster region	Cytoplasm	kinase	cyclophosphamide/daunorubicin/imatinib/prednisone/vincristine, imatinib	P11274	x	safety	Cancer, Cardiovascular Disease, Connective Tissue Disorders, Dermatological Diseases and Conditions, Developmental Disorder, Endocrine System Disorders, Gastrointestinal Disease, Hematological Disease, Immunological Disease, Infectious Disease, Inflammatory Disease, Inflammatory Response, Neurological Disease, Nutritional Disease, Organismal Injury and Abnormalities, Psychological Disorders, Repr…
BIRC3	baculoviral IAP repeat containing 3	Cytoplasm	enzyme		Q13489	x	diagnosis	Antimicrobial Response, Cancer, Cardiovascular Disease, Gastrointestinal Disease, Hematological Disease, Hepatic System Disease, Immunological Disease, Infectious Disease, Inflammatory Disease, Inflammatory Response, Organismal Injury and Abnormalities, Renal and Urological Disease
BMPR2	bone morphogenetic protein receptor, type II (serine/threonine kinase)	Plasma Membrane	kinase		Q13873	x	diagnosis,unspecified application	Cancer, Cardiovascular Disease, Dermatological Diseases and Conditions, Developmental Disorder, Endocrine System Disorders, Gastrointestinal Disease, Hematological Disease, Hereditary Disorder, Inflammatory Response, Organismal Injury and Abnormalities, Reproductive System Disease, Respiratory Disease, Skeletal and Muscular Disorders
BRAF	v-raf murine sarcoma viral oncogene homolog B	Cytoplasm	enzyme	vemurafenib, dabrafenib, regorafenib, bortezomib/sorafenib, dexamethasone/lenalidomide/sorafenib, bevacizumab/sorafenib, LGX-818, dabrafenib/trametinib, sorafenib	P15056	x	diagnosis,prognosis,response to therapy	Cancer, Cardiovascular Disease, Connective Tissue Disorders, Dermatological Diseases and Conditions, Developmental Disorder, Endocrine System Disorders, Gastrointestinal Disease, Hematological Disease, Hepatic System Disease, Hereditary Disorder, Immunological Disease, Inflammatory Disease, Inflammatory Response, Neurological Disease, Ophthalmic Disease, Organismal Injury and Abnormalities, Psych…
BRCA1	breast cancer 1, early onset	Nucleus	transcription regulator		P38398	x	diagnosis,efficacy,response to therapy	Cancer, Connective Tissue Disorders, Dermatological Diseases and Conditions, Developmental Disorder, Endocrine System Disorders, Gastrointestinal Disease, Hematological Disease, Hepatic System Disease, Hereditary Disorder, Immunological Disease, Infectious Disease, Metabolic Disease, Neurological Disease, Organismal Injury and Abnormalities, Psychological Disorders, Renal and Urological Disease, …
BRCA2	breast cancer 2, early onset	Nucleus	transcription regulator		P51587	x	diagnosis,efficacy,response to therapy	Cancer, Cardiovascular Disease, Connective Tissue Disorders, Dermatological Diseases and Conditions, Developmental Disorder, Endocrine System Disorders, Gastrointestinal Disease, Hematological Disease, Hepatic System Disease, Hereditary Disorder, Immunological Disease, Infectious Disease, Metabolic Disease, Neurological Disease, Organismal Injury and Abnormalities, Renal and Urological Disease, R…
BSG	basigin (Ok blood group)	Plasma Membrane	transporter		P35613	x	disease progression,prognosis,response to therapy	Cancer, Connective Tissue Disorders, Gastrointestinal Disease, Hematological Disease, Hepatic System Disease, Immunological Disease, Infectious Disease, Inflammatory Disease, Inflammatory Response, Organismal Injury and Abnormalities, Renal and Urological Disease, Reproductive System Disease, Respiratory Disease, Skeletal and Muscular Disorders
C3	complement component 3	Extracellular Space	peptidase		P01024	x	efficacy	Antimicrobial Response, Cancer, Cardiovascular Disease, Connective Tissue Disorders, Dermatological Diseases and Conditions, Developmental Disorder, Endocrine System Disorders, Gastrointestinal Disease, Hematological Disease, Hepatic System Disease, Hereditary Disorder, Hypersensitivity Response, Immunological Disease, Infectious Disease, Inflammatory Disease, Inflammatory Response, Metabolic Dis…
CA2	carbonic anhydrase II	Cytoplasm	enzyme	ethoxyzolamide, dichlorphenamide, phentermine/topiramate, brimonidine/brinzolamide, methazolamide, diazoxide, hydrochlorothiazide, acetazolamide, trichloromethiazide, dorzolamide, chlorothiazide, dorzolamide/timolol, brinzolamide, chlorothiazide/reserpine, quinethazone, chlorthalidone, benzthiazide, sulfacetamide, topiramate	P00918	x	diagnosis,unspecified application	Cancer, Cardiovascular Disease, Connective Tissue Disorders, Developmental Disorder, Endocrine System Disorders, Gastrointestinal Disease, Hematological Disease, Hepatic System Disease, Hereditary Disorder, Immunological Disease, Infectious Disease, Inflammatory Disease, Inflammatory Response, Metabolic Disease, Neurological Disease, Nutritional Disease, Ophthalmic Disease, Organismal Injury and …
CAP2	CAP, adenylate cyclase-associated protein, 2 (yeast)	Plasma Membrane	other		P40123	x	disease progression	Cancer, Gastrointestinal Disease, Hepatic System Disease, Hereditary Disorder, Neurological Disease, Organismal Injury and Abnormalities, Psychological Disorders, Reproductive System Disease
CARD9	caspase recruitment domain family, member 9	Cytoplasm	other		Q9H257	x	diagnosis	Antimicrobial Response, Cancer, Dermatological Diseases and Conditions, Hematological Disease, Hereditary Disorder, Immunological Disease, Infectious Disease, Inflammatory Response, Respiratory Disease
CASP8	caspase 8, apoptosis-related cysteine peptidase	Nucleus	peptidase		Q14790	x	diagnosis,efficacy,prognosis	Cancer, Cardiovascular Disease, Connective Tissue Disorders, Endocrine System Disorders, Gastrointestinal Disease, Hematological Disease, Hepatic System Disease, Hereditary Disorder, Immunological Disease, Infectious Disease, Inflammatory Disease, Inflammatory Response, Metabolic Disease, Neurological Disease, Organismal Injury and Abnormalities, Psychological Disorders, Reproductive System Disea…
CASP9	caspase 9, apoptosis-related cysteine peptidase	Cytoplasm	peptidase		P55211	x	diagnosis,efficacy	Cancer, Cardiovascular Disease, Connective Tissue Disorders, Developmental Disorder, Gastrointestinal Disease, Hepatic System Disease, Hereditary Disorder, Infectious Disease, Inflammatory Response, Metabolic Disease, Neurological Disease, Organismal Injury and Abnormalities, Psychological Disorders, Renal and Urological Disease, Reproductive System Disease, Skeletal and Muscular Disorders
CASR	calcium-sensing receptor	Plasma Membrane	G-protein coupled receptor	cinacalcet	P41180	x	diagnosis	Cancer, Cardiovascular Disease, Connective Tissue Disorders, Developmental Disorder, Endocrine System Disorders, Gastrointestinal Disease, Hematological Disease, Hereditary Disorder, Inflammatory Disease, Inflammatory Response, Metabolic Disease, Neurological Disease, Nutritional Disease, Organismal Injury and Abnormalities, Renal and Urological Disease, Reproductive System Disease, Skeletal and …
CAV1	caveolin 1, caveolae protein, 22kDa	Plasma Membrane	transmembrane receptor		Q03135	x	diagnosis	Antimicrobial Response, Cancer, Cardiovascular Disease, Connective Tissue Disorders, Dermatological Diseases and Conditions, Developmental Disorder, Endocrine System Disorders, Gastrointestinal Disease, Hematological Disease, Hepatic System Disease, Hereditary Disorder, Immunological Disease, Infectious Disease, Inflammatory Disease, Inflammatory Response, Metabolic Disease, Neurological Disease,…
CBLC	Cbl proto-oncogene C, E3 ubiquitin protein ligase	Nucleus	enzyme		Q9ULV8	x	unspecified application	Cancer, Infectious Disease, Respiratory Disease
CBX4	chromobox homolog 4	Nucleus	transcription regulator		O00257	x	prognosis	Cancer, Developmental Disorder, Immunological Disease, Organismal Injury and Abnormalities, Reproductive System Disease
CCND1	cyclin D1	Nucleus	other	arsenic trioxide/tretinoin, arsenic trioxide/daunorubicin/tretinoin, arsenic trioxide/gemtuzumab ozogamicin/tretinoin, arsenic trioxide	P24385	x	diagnosis,efficacy,prognosis,response to therapy,unspecified application	Cancer, Cardiovascular Disease, Connective Tissue Disorders, Dental Disease, Dermatological Diseases and Conditions, Developmental Disorder, Endocrine System Disorders, Gastrointestinal Disease, Hematological Disease, Hepatic System Disease, Hereditary Disorder, Immunological Disease, Inflammatory Disease, Inflammatory Response, Metabolic Disease, Neurological Disease, Nutritional Disease, Ophtha…
CCND2	cyclin D2	Nucleus	other		P30279	x	diagnosis,efficacy	Cancer, Connective Tissue Disorders, Dermatological Diseases and Conditions, Developmental Disorder, Endocrine System Disorders, Gastrointestinal Disease, Hematological Disease, Hereditary Disorder, Immunological Disease, Metabolic Disease, Neurological Disease, Ophthalmic Disease, Organismal Injury and Abnormalities, Psychological Disorders, Renal and Urological Disease, Reproductive System Dise…
CCND3	cyclin D3	Nucleus	other		P30281	x	prognosis	Cancer, Connective Tissue Disorders, Dermatological Diseases and Conditions, Developmental Disorder, Endocrine System Disorders, Hematological Disease, Hereditary Disorder, Immunological Disease, Inflammatory Disease, Nutritional Disease, Ophthalmic Disease, Organismal Injury and Abnormalities, Renal and Urological Disease, Reproductive System Disease, Respiratory Disease, Skeletal and Muscular D…
CCR5	chemokine (C-C motif) receptor 5 (gene/pseudogene)	Plasma Membrane	G-protein coupled receptor	maraviroc, vicriviroc, ancriviroc	P51681	x	diagnosis,efficacy	Cancer, Cardiovascular Disease, Connective Tissue Disorders, Dermatological Diseases and Conditions, Endocrine System Disorders, Gastrointestinal Disease, Hematological Disease, Hepatic System Disease, Immunological Disease, Infectious Disease, Inflammatory Disease, Inflammatory Response, Metabolic Disease, Neurological Disease, Nutritional Disease, Ophthalmic Disease, Organismal Injury and Abnor…
CD34	CD34 molecule	Plasma Membrane	other		P28906	x	efficacy,prognosis	Cancer, Cardiovascular Disease, Connective Tissue Disorders, Dermatological Diseases and Conditions, Endocrine System Disorders, Gastrointestinal Disease, Hematological Disease, Hepatic System Disease, Hypersensitivity Response, Immunological Disease, Inflammatory Disease, Inflammatory Response, Metabolic Disease, Organismal Injury and Abnormalities, Renal and Urological Disease, Reproductive Sys…
CD36	CD36 molecule (thrombospondin receptor)	Plasma Membrane	transmembrane receptor		P16671	x	efficacy	Cancer, Cardiovascular Disease, Connective Tissue Disorders, Dermatological Diseases and Conditions, Developmental Disorder, Endocrine System Disorders, Gastrointestinal Disease, Hematological Disease, Hereditary Disorder, Hypersensitivity Response, Immunological Disease, Infectious Disease, Inflammatory Disease, Inflammatory Response, Metabolic Disease, Neurological Disease, Nutritional Disease,…
CD44	CD44 molecule (Indian blood group)	Plasma Membrane	enzyme		P16070	x	diagnosis,disease progression,prognosis,unspecified application	Cancer, Cardiovascular Disease, Connective Tissue Disorders, Dermatological Diseases and Conditions, Gastrointestinal Disease, Hematological Disease, Hepatic System Disease, Hereditary Disorder, Immunological Disease, Infectious Disease, Inflammatory Disease, Inflammatory Response, Neurological Disease, Nutritional Disease, Organismal Injury and Abnormalities, Psychological Disorders, Renal and U…
CDH1	cadherin 1, type 1, E-cadherin (epithelial)	Plasma Membrane	other		P12830	x	diagnosis,disease progression,efficacy,prognosis	Cancer, Connective Tissue Disorders, Dermatological Diseases and Conditions, Developmental Disorder, Endocrine System Disorders, Gastrointestinal Disease, Hepatic System Disease, Hereditary Disorder, Immunological Disease, Inflammatory Disease, Inflammatory Response, Organismal Injury and Abnormalities, Renal and Urological Disease, Reproductive System Disease, Respiratory Disease, Skeletal and M…
CDH2	cadherin 2, type 1, N-cadherin (neuronal)	Plasma Membrane	other	N-ac-CHAVC-NH2	P19022	x	diagnosis,prognosis	Cancer, Connective Tissue Disorders, Developmental Disorder, Endocrine System Disorders, Gastrointestinal Disease, Hereditary Disorder, Metabolic Disease, Neurological Disease, Organismal Injury and Abnormalities, Psychological Disorders, Reproductive System Disease, Skeletal and Muscular Disorders
CDKN2A	cyclin-dependent kinase inhibitor 2A	Nucleus	transcription regulator		P42771	x	diagnosis,disease progression,efficacy,prognosis,response to therapy,safety	Cancer, Cardiovascular Disease, Connective Tissue Disorders, Dermatological Diseases and Conditions, Developmental Disorder, Endocrine System Disorders, Gastrointestinal Disease, Hematological Disease, Hepatic System Disease, Hereditary Disorder, Hypersensitivity Response, Immunological Disease, Infectious Disease, Inflammatory Disease, Inflammatory Response, Metabolic Disease, Neurological Disea…
CDX2	caudal type homeobox 2	Nucleus	transcription regulator		Q99626	x	prognosis,unspecified application	Cancer, Developmental Disorder, Gastrointestinal Disease, Hereditary Disorder, Inflammatory Disease, Neurological Disease, Organismal Injury and Abnormalities, Skeletal and Muscular Disorders
CEACAM1	carcinoembryonic antigen-related cell adhesion molecule 1 (biliary glycoprotein)	Plasma Membrane	other		P13688	x	diagnosis,efficacy	Cancer, Connective Tissue Disorders, Gastrointestinal Disease, Immunological Disease, Inflammatory Disease, Inflammatory Response, Respiratory Disease, Skeletal and Muscular Disorders
CEACAM7	carcinoembryonic antigen-related cell adhesion molecule 7	Plasma Membrane	other		Q14002	x	diagnosis	Cancer, Gastrointestinal Disease, Infectious Disease, Organismal Injury and Abnormalities, Reproductive System Disease
CEBPA	CCAAT/enhancer binding protein (C/EBP), alpha	Nucleus	transcription regulator		P49715	x	diagnosis,disease progression,prognosis	Cancer, Connective Tissue Disorders, Dermatological Diseases and Conditions, Developmental Disorder, Endocrine System Disorders, Gastrointestinal Disease, Hematological Disease, Hepatic System Disease, Hereditary Disorder, Immunological Disease, Inflammatory Disease, Inflammatory Response, Metabolic Disease, Neurological Disease, Nutritional Disease, Organismal Injury and Abnormalities, Psycholog…
CFTR	cystic fibrosis transmembrane conductance regulator (ATP-binding cassette sub-family C, member 7)	Plasma Membrane	ion channel	crofelemer, ivacaftor	P13569	x	diagnosis,disease progression	Cancer, Connective Tissue Disorders, Dermatological Diseases and Conditions, Developmental Disorder, Endocrine System Disorders, Gastrointestinal Disease, Hematological Disease, Hepatic System Disease, Hereditary Disorder, Hypersensitivity Response, Immunological Disease, Infectious Disease, Inflammatory Disease, Inflammatory Response, Neurological Disease, Nutritional Disease, Organismal Injury …
CHAF1B	chromatin assembly factor 1, subunit B (p60)	Nucleus	other		Q13112	x	unspecified application	Cancer, Hereditary Disorder, Neurological Disease, Organismal Injury and Abnormalities, Psychological Disorders, Reproductive System Disease, Skeletal and Muscular Disorders
CHGA	chromogranin A (parathyroid secretory protein 1)	Cytoplasm	other		P10645	x	diagnosis,efficacy,unspecified application	Cancer, Cardiovascular Disease, Developmental Disorder, Endocrine System Disorders, Gastrointestinal Disease, Hematological Disease, Hepatic System Disease, Immunological Disease, Neurological Disease, Organismal Injury and Abnormalities, Psychological Disorders, Renal and Urological Disease, Reproductive System Disease, Skeletal and Muscular Disorders
CKB	creatine kinase, brain	Cytoplasm	kinase		P12277	x	safety	Cancer, Developmental Disorder, Hereditary Disorder, Inflammatory Response, Neurological Disease, Organismal Injury and Abnormalities, Psychological Disorders, Reproductive System Disease, Respiratory Disease, Skeletal and Muscular Disorders
CLTCL1	clathrin, heavy chain-like 1	Plasma Membrane	other		P53675	x	disease progression	Cancer, Gastrointestinal Disease, Infectious Disease, Organismal Injury and Abnormalities, Reproductive System Disease
CLU	clusterin	Cytoplasm	other		P10909	x	efficacy,unspecified application	Cancer, Cardiovascular Disease, Connective Tissue Disorders, Dermatological Diseases and Conditions, Developmental Disorder, Endocrine System Disorders, Gastrointestinal Disease, Hepatic System Disease, Hereditary Disorder, Immunological Disease, Infectious Disease, Inflammatory Disease, Inflammatory Response, Metabolic Disease, Neurological Disease, Ophthalmic Disease, Organismal Injury and Abno…
COL1A1	collagen, type I, alpha 1	Extracellular Space	other	collagenase clostridium histolyticum	P02452	x	diagnosis	Auditory Disease, Cancer, Cardiovascular Disease, Connective Tissue Disorders, Dermatological Diseases and Conditions, Developmental Disorder, Gastrointestinal Disease, Hematological Disease, Hepatic System Disease, Hereditary Disorder, Immunological Disease, Inflammatory Disease, Inflammatory Response, Metabolic Disease, Neurological Disease, Organismal Injury and Abnormalities, Reproductive Sys…
CP	ceruloplasmin (ferroxidase)	Extracellular Space	enzyme		P00450	x	efficacy	Cancer, Developmental Disorder, Endocrine System Disorders, Gastrointestinal Disease, Hematological Disease, Hepatic System Disease, Hereditary Disorder, Inflammatory Response, Metabolic Disease, Neurological Disease, Nutritional Disease, Ophthalmic Disease, Organismal Injury and Abnormalities, Psychological Disorders, Renal and Urological Disease, Reproductive System Disease, Skeletal and Muscul…
CPS1	carbamoyl-phosphate synthase 1, mitochondrial	Cytoplasm	enzyme	N-carbamyl-L-glutamate	P31327	x	unspecified application	Cancer, Cardiovascular Disease, Developmental Disorder, Gastrointestinal Disease, Hereditary Disorder, Metabolic Disease, Neurological Disease, Organismal Injury and Abnormalities, Reproductive System Disease, Respiratory Disease
CPT2	carnitine palmitoyltransferase 2	Cytoplasm	enzyme	perhexiline	P23786	x	unspecified application	Cancer, Cardiovascular Disease, Developmental Disorder, Hematological Disease, Hereditary Disorder, Metabolic Disease, Neurological Disease
CRMP1	collapsin response mediator protein 1	Cytoplasm	enzyme		Q14194	x	disease progression	Cancer, Gastrointestinal Disease, Infectious Disease, Organismal Injury and Abnormalities, Reproductive System Disease
CSF1	colony stimulating factor 1 (macrophage)	Extracellular Space	cytokine		P09603	x	diagnosis,disease progression,efficacy,prognosis,unspecified application	Cancer, Cardiovascular Disease, Connective Tissue Disorders, Dermatological Diseases and Conditions, Developmental Disorder, Gastrointestinal Disease, Hematological Disease, Hepatic System Disease, Hereditary Disorder, Hypersensitivity Response, Immunological Disease, Infectious Disease, Inflammatory Disease, Inflammatory Response, Metabolic Disease, Neurological Disease, Ophthalmic Disease, Orga…
CSF1R	colony stimulating factor 1 receptor	Plasma Membrane	kinase	nilotinib, sunitinib, pazopanib	P07333	x	prognosis	Auditory Disease, Cancer, Cardiovascular Disease, Connective Tissue Disorders, Developmental Disorder, Endocrine System Disorders, Gastrointestinal Disease, Hematological Disease, Hepatic System Disease, Hereditary Disorder, Immunological Disease, Inflammatory Disease, Inflammatory Response, Neurological Disease, Nutritional Disease, Organismal Injury and Abnormalities, Psychological Disorders, R…
CSTB	cystatin B (stefin B)	Cytoplasm	peptidase		P04080	x	diagnosis	Cancer, Dermatological Diseases and Conditions, Developmental Disorder, Gastrointestinal Disease, Hereditary Disorder, Inflammatory Disease, Neurological Disease, Ophthalmic Disease, Organismal Injury and Abnormalities, Psychological Disorders
CTNNA1	catenin (cadherin-associated protein), alpha 1, 102kDa	Plasma Membrane	other		P35221	x	diagnosis	Cancer, Cardiovascular Disease, Gastrointestinal Disease, Hereditary Disorder, Neurological Disease, Organismal Injury and Abnormalities, Reproductive System Disease
CTNNB1	catenin (cadherin-associated protein), beta 1, 88kDa	Nucleus	transcription regulator		P35222	x	diagnosis,disease progression,efficacy,prognosis	Cancer, Cardiovascular Disease, Connective Tissue Disorders, Dermatological Diseases and Conditions, Developmental Disorder, Endocrine System Disorders, Gastrointestinal Disease, Hematological Disease, Hepatic System Disease, Hereditary Disorder, Immunological Disease, Infectious Disease, Inflammatory Disease, Metabolic Disease, Neurological Disease, Organismal Injury and Abnormalities, Psycholog…
CTTN	cortactin	Plasma Membrane	other		Q14247	x	efficacy	Cancer, Gastrointestinal Disease, Hepatic System Disease, Inflammatory Response
CXCR4	chemokine (C-X-C motif) receptor 4	Plasma Membrane	G-protein coupled receptor	cladribine/cytarabine/filgrastim/idarubicin/plerixafor, plerixafor	P61073	x	diagnosis	Antimicrobial Response, Cancer, Cardiovascular Disease, Connective Tissue Disorders, Dermatological Diseases and Conditions, Developmental Disorder, Endocrine System Disorders, Gastrointestinal Disease, Hematological Disease, Hepatic System Disease, Hereditary Disorder, Immunological Disease, Infectious Disease, Inflammatory Disease, Inflammatory Response, Metabolic Disease, Neurological Disease,…
CYP2E1	cytochrome P450, family 2, subfamily E, polypeptide 1	Cytoplasm	enzyme		P05181	x	diagnosis	Cancer, Cardiovascular Disease, Dermatological Diseases and Conditions, Endocrine System Disorders, Gastrointestinal Disease, Hematological Disease, Hepatic System Disease, Hereditary Disorder, Inflammatory Disease, Inflammatory Response, Metabolic Disease, Neurological Disease, Nutritional Disease, Organismal Injury and Abnormalities, Psychological Disorders, Reproductive System Disease, Respira…
CYP3A4	cytochrome P450, family 3, subfamily A, polypeptide 4	Cytoplasm	enzyme	cobicistat, cobicistat/elvitegravir/emtricitabine/tenofovir disoproxil, ketoconazole	P08684	x	diagnosis,efficacy,safety	Cancer, Dermatological Diseases and Conditions, Gastrointestinal Disease, Hematological Disease, Infectious Disease, Inflammatory Disease, Inflammatory Response, Metabolic Disease, Neurological Disease, Organismal Injury and Abnormalities, Psychological Disorders, Renal and Urological Disease, Reproductive System Disease, Respiratory Disease, Skeletal and Muscular Disorders
DBNL	drebrin-like	Cytoplasm	other		Q9UJU6	x	diagnosis	Cancer, Inflammatory Disease, Neurological Disease, Organismal Injury and Abnormalities, Psychological Disorders, Reproductive System Disease, Respiratory Disease, Skeletal and Muscular Disorders
DCK	deoxycytidine kinase	Nucleus	kinase	cytarabine/fludarabine phosphate, cladribine/cytarabine/daunorubicin, cladribine/cytarabine/filgrastim, cytarabine/filgrastim/fludarabine phosphate, cladribine/cytarabine/filgrastim/mitoxantrone, fludarabine phosphate/rituximab, cladribine/rituximab, cytarabine/filgrastim/fludarabine phosphate/idarubicin, dexamethasone/fludarabine phosphate/mitoxantrone, alemtuzumab/fludarabine phosphate, fludara…	P27707	x	efficacy,response to therapy	Cancer, Connective Tissue Disorders, Developmental Disorder, Hematological Disease, Hereditary Disorder, Immunological Disease, Inflammatory Disease, Neurological Disease, Skeletal and Muscular Disorders
DDR1	discoidin domain receptor tyrosine kinase 1	Plasma Membrane	kinase	nilotinib	Q08345	x	diagnosis	Cancer, Cardiovascular Disease, Connective Tissue Disorders, Dermatological Diseases and Conditions, Developmental Disorder, Endocrine System Disorders, Gastrointestinal Disease, Hematological Disease, Hereditary Disorder, Immunological Disease, Inflammatory Disease, Inflammatory Response, Metabolic Disease, Neurological Disease, Organismal Injury and Abnormalities, Psychological Disorders, Renal…
DDX5	DEAD (Asp-Glu-Ala-Asp) box helicase 5	Nucleus	enzyme		P17844	x	unspecified application	Cancer, Gastrointestinal Disease, Hepatic System Disease, Infectious Disease, Inflammatory Disease, Inflammatory Response, Organismal Injury and Abnormalities, Renal and Urological Disease, Reproductive System Disease
DDX17	DEAD (Asp-Glu-Ala-Asp) box helicase 17	Nucleus	enzyme		Q92841	x	unspecified application	Cancer, Gastrointestinal Disease, Infectious Disease, Organismal Injury and Abnormalities, Reproductive System Disease, Respiratory Disease
DDX39B	DEAD (Asp-Glu-Ala-Asp) box polypeptide 39B	Nucleus	enzyme		Q13838	x	safety	Cancer, Connective Tissue Disorders, Endocrine System Disorders, Gastrointestinal Disease, Immunological Disease, Inflammatory Disease, Metabolic Disease, Skeletal and Muscular Disorders
DDX3X	DEAD (Asp-Glu-Ala-Asp) box helicase 3, X-linked	Cytoplasm	enzyme		O00571	x	diagnosis	Antimicrobial Response, Cancer, Gastrointestinal Disease, Hepatic System Disease, Infectious Disease, Inflammatory Response, Neurological Disease, Reproductive System Disease
DHPS	deoxyhypusine synthase	Cytoplasm	enzyme		P49366	x	efficacy	Hereditary Disorder, Neurological Disease, Psychological Disorders
DMXL1	Dmx-like 1	Extracellular Space	other		Q9Y485	x	diagnosis	Cancer, Endocrine System Disorders, Gastrointestinal Disease, Hematological Disease, Immunological Disease, Infectious Disease, Organismal Injury and Abnormalities, Renal and Urological Disease, Reproductive System Disease
DNMT1	DNA (cytosine-5-)-methyltransferase 1	Nucleus	enzyme	5-azacytidine/decitabine, 5-azacytidine/cytarabine/decitabine, 5-azacytidine, decitabine	P26358	x	diagnosis	Auditory Disease, Cancer, Connective Tissue Disorders, Developmental Disorder, Endocrine System Disorders, Gastrointestinal Disease, Hematological Disease, Hereditary Disorder, Immunological Disease, Inflammatory Disease, Neurological Disease, Organismal Injury and Abnormalities, Psychological Disorders, Reproductive System Disease, Respiratory Disease, Skeletal and Muscular Disorders
DRD2	dopamine receptor D2	Plasma Membrane	G-protein coupled receptor	paliperidone, risperidone, buspirone, carbidopa/entacapone/levodopa, bifeprunox, iloperidone, blonanserin, asenapine, pardoprunox, ocaperidone, abaperidone, methotrimeprazine, fluspirilene, SLV-314, cariprazine, rotigotine, acetophenazine, sultopride, zuclopenthixol, thioproperazine, lurasidone, opipramol, paliperidone palmitate, pipothiazine, carbidopa/levodopa, chloropromazine, domperidone, met…	P14416	x	response to therapy	Cancer, Cardiovascular Disease, Connective Tissue Disorders, Dermatological Diseases and Conditions, Developmental Disorder, Endocrine System Disorders, Gastrointestinal Disease, Hematological Disease, Hepatic System Disease, Hereditary Disorder, Immunological Disease, Infectious Disease, Inflammatory Disease, Inflammatory Response, Metabolic Disease, Neurological Disease, Nutritional Disease, Op…
DRD3	dopamine receptor D3	Plasma Membrane	G-protein coupled receptor	paliperidone, carbidopa/entacapone/levodopa, iloperidone, asenapine, abaperidone, PNU 170413, cariprazine, rotigotine, carbidopa/levodopa, domperidone, chlorprothixene, trifluoperazine, fluphenazine, pimozide, clozapine, haloperidol, fluoxetine/olanzapine, fluphenazine decanoate, thiothixene, amitriptyline/perphenazine, haloperidol decanoate, trimethobenzamide, fluphenazine enanthate, perphenazin…	P35462	x	unspecified application	Cancer, Cardiovascular Disease, Connective Tissue Disorders, Dermatological Diseases and Conditions, Developmental Disorder, Endocrine System Disorders, Gastrointestinal Disease, Hematological Disease, Hereditary Disorder, Inflammatory Disease, Inflammatory Response, Metabolic Disease, Neurological Disease, Nutritional Disease, Ophthalmic Disease, Organismal Injury and Abnormalities, Psychologica…
DSC2	desmocollin 2	Plasma Membrane	other		Q02487	x	unspecified application	Cancer, Cardiovascular Disease, Dermatological Diseases and Conditions, Developmental Disorder, Gastrointestinal Disease, Organismal Injury and Abnormalities, Reproductive System Disease
DST	dystonin	Plasma Membrane	other		Q03001	x	unspecified application	Cancer, Connective Tissue Disorders, Dermatological Diseases and Conditions, Developmental Disorder, Gastrointestinal Disease, Hereditary Disorder, Neurological Disease, Organismal Injury and Abnormalities, Reproductive System Disease
DTNA	dystrobrevin, alpha	Plasma Membrane	other		Q9Y4J8	x	unspecified application	Cancer, Cardiovascular Disease, Developmental Disorder, Endocrine System Disorders, Hereditary Disorder, Neurological Disease, Organismal Injury and Abnormalities, Psychological Disorders, Reproductive System Disease, Skeletal and Muscular Disorders
DTNBP1	dystrobrevin binding protein 1	Plasma Membrane	other		Q96EV8	x	diagnosis	Cancer, Dermatological Diseases and Conditions, Developmental Disorder, Hereditary Disorder, Metabolic Disease, Neurological Disease, Ophthalmic Disease, Organismal Injury and Abnormalities, Psychological Disorders
DUSP1	dual specificity phosphatase 1	Nucleus	phosphatase		P28562	x	diagnosis,efficacy	Cancer, Cardiovascular Disease, Connective Tissue Disorders, Dermatological Diseases and Conditions, Developmental Disorder, Endocrine System Disorders, Gastrointestinal Disease, Hematological Disease, Hepatic System Disease, Hereditary Disorder, Hypersensitivity Response, Immunological Disease, Infectious Disease, Inflammatory Disease, Inflammatory Response, Metabolic Disease, Neurological Disea…
DUSP4	dual specificity phosphatase 4	Nucleus	phosphatase		Q13115	x	diagnosis	Cancer, Cardiovascular Disease, Endocrine System Disorders, Hematological Disease, Hereditary Disorder, Immunological Disease, Infectious Disease, Neurological Disease, Organismal Injury and Abnormalities, Reproductive System Disease
DUSP6	dual specificity phosphatase 6	Cytoplasm	phosphatase		Q16828	x	diagnosis	Cancer, Cardiovascular Disease, Developmental Disorder, Endocrine System Disorders, Gastrointestinal Disease, Neurological Disease, Organismal Injury and Abnormalities, Psychological Disorders, Renal and Urological Disease, Reproductive System Disease, Respiratory Disease
E2F3	E2F transcription factor 3	Nucleus	transcription regulator		O00716	x	unspecified application	Cancer, Cardiovascular Disease, Developmental Disorder, Endocrine System Disorders, Gastrointestinal Disease, Hematological Disease, Immunological Disease, Inflammatory Response, Metabolic Disease, Nutritional Disease, Organismal Injury and Abnormalities, Renal and Urological Disease, Reproductive System Disease, Respiratory Disease
EEF1A2	eukaryotic translation elongation factor 1 alpha 2	Cytoplasm	translation regulator		Q05639	x	prognosis,unspecified application	Cancer, Cardiovascular Disease, Endocrine System Disorders, Gastrointestinal Disease, Hereditary Disorder, Infectious Disease, Inflammatory Response, Neurological Disease, Organismal Injury and Abnormalities, Psychological Disorders, Renal and Urological Disease, Reproductive System Disease, Skeletal and Muscular Disorders
EGF	epidermal growth factor	Extracellular Space	growth factor		P01133	x	diagnosis,efficacy,response to therapy,unspecified application	Cancer, Connective Tissue Disorders, Dermatological Diseases and Conditions, Developmental Disorder, Endocrine System Disorders, Gastrointestinal Disease, Hematological Disease, Hepatic System Disease, Hereditary Disorder, Immunological Disease, Infectious Disease, Inflammatory Disease, Inflammatory Response, Neurological Disease, Nutritional Disease, Ophthalmic Disease, Organismal Injury and Abn…
EGFR	epidermal growth factor receptor	Plasma Membrane	kinase	cetuximab, AEE 788, panitumumab, BMS-599626, varlitinib, XL647, bevacizumab/erlotinib, afatinib, sapitinib, cetuximab/irinotecan, lapatinib/pazopanib, irinotecan/panitumumab, erlotinib/vismodegib, erlotinib/gemcitabine, lapatinib/letrozole, bevacizumab/panitumumab, bevacizumab/cetuximab, capecitabine/erlotinib, lapatinib/paclitaxel, canertinib, gefitinib, neratinib, PD 153035, lapatinib, vandetan…	P00533	x	diagnosis,disease progression,efficacy,prognosis,response to therapy,safety,unspecified application	Antimicrobial Response, Cancer, Cardiovascular Disease, Connective Tissue Disorders, Dermatological Diseases and Conditions, Developmental Disorder, Endocrine System Disorders, Gastrointestinal Disease, Hematological Disease, Hepatic System Disease, Hereditary Disorder, Immunological Disease, Infectious Disease, Inflammatory Disease, Inflammatory Response, Neurological Disease, Nutritional Diseas…
EIF2AK3	eukaryotic translation initiation factor 2-alpha kinase 3	Cytoplasm	kinase		Q9NZJ5	x	efficacy	Cancer, Cardiovascular Disease, Connective Tissue Disorders, Developmental Disorder, Endocrine System Disorders, Gastrointestinal Disease, Hematological Disease, Hereditary Disorder, Immunological Disease, Infectious Disease, Inflammatory Disease, Inflammatory Response, Metabolic Disease, Neurological Disease, Nutritional Disease, Organismal Injury and Abnormalities, Psychological Disorders, Repr…
EIF4B	eukaryotic translation initiation factor 4B	Cytoplasm	translation regulator		P23588	x	unspecified application	Cancer, Organismal Injury and Abnormalities, Reproductive System Disease
EIF4E	eukaryotic translation initiation factor 4E	Cytoplasm	translation regulator		P06730	x	prognosis	Cancer, Dermatological Diseases and Conditions, Gastrointestinal Disease, Hematological Disease, Hepatic System Disease, Immunological Disease, Neurological Disease, Organismal Injury and Abnormalities, Psychological Disorders, Reproductive System Disease, Respiratory Disease
EIF4EBP1	eukaryotic translation initiation factor 4E binding protein 1	Cytoplasm	translation regulator		Q13541	x	efficacy	Cancer, Cardiovascular Disease, Connective Tissue Disorders, Dermatological Diseases and Conditions, Developmental Disorder, Endocrine System Disorders, Hematological Disease, Hereditary Disorder, Immunological Disease, Infectious Disease, Inflammatory Response, Metabolic Disease, Neurological Disease, Nutritional Disease, Organismal Injury and Abnormalities, Psychological Disorders, Reproductive…
ELAVL1	ELAV like RNA binding protein 1	Cytoplasm	other		Q15717	x	efficacy	Cancer, Developmental Disorder, Hematological Disease, Immunological Disease, Inflammatory Disease, Inflammatory Response, Neurological Disease, Organismal Injury and Abnormalities, Reproductive System Disease, Respiratory Disease
ENAH	enabled homolog (Drosophila)	Plasma Membrane	other		Q8N8S7	x	disease progression	Cancer, Endocrine System Disorders, Gastrointestinal Disease, Immunological Disease, Metabolic Disease, Organismal Injury and Abnormalities, Reproductive System Disease
ENO1	enolase 1, (alpha)	Cytoplasm	enzyme		P06733	x	diagnosis	Cancer, Connective Tissue Disorders, Dermatological Diseases and Conditions, Endocrine System Disorders, Gastrointestinal Disease, Hematological Disease, Immunological Disease, Inflammatory Disease, Inflammatory Response, Organismal Injury and Abnormalities, Reproductive System Disease, Respiratory Disease, Skeletal and Muscular Disorders
ENO3	enolase 3 (beta, muscle)	Cytoplasm	enzyme		P13929	x	unspecified application	Cancer, Developmental Disorder, Hereditary Disorder, Metabolic Disease, Neurological Disease, Psychological Disorders, Skeletal and Muscular Disorders
ENOX2	ecto-NOX disulfide-thiol exchanger 2	Plasma Membrane	enzyme		Q16206	x	efficacy	Cancer, Organismal Injury and Abnormalities, Reproductive System Disease
EPAS1	endothelial PAS domain protein 1	Nucleus	transcription regulator		Q99814	x	prognosis	Cancer, Cardiovascular Disease, Dermatological Diseases and Conditions, Developmental Disorder, Endocrine System Disorders, Gastrointestinal Disease, Hematological Disease, Hepatic System Disease, Hereditary Disorder, Immunological Disease, Infectious Disease, Inflammatory Disease, Inflammatory Response, Metabolic Disease, Neurological Disease, Ophthalmic Disease, Organismal Injury and Abnormalit…
EPHA2	EPH receptor A2	Plasma Membrane	kinase	dasatinib, regorafenib	P29317	x	disease progression	Cancer, Cardiovascular Disease, Connective Tissue Disorders, Dermatological Diseases and Conditions, Developmental Disorder, Endocrine System Disorders, Gastrointestinal Disease, Hematological Disease, Hepatic System Disease, Hereditary Disorder, Immunological Disease, Infectious Disease, Inflammatory Response, Neurological Disease, Ophthalmic Disease, Organismal Injury and Abnormalities, Reprodu…
EPHB2	EPH receptor B2	Plasma Membrane	kinase		P29323	x	unspecified application	Auditory Disease, Cancer, Developmental Disorder, Endocrine System Disorders, Gastrointestinal Disease, Hereditary Disorder, Infectious Disease, Neurological Disease, Organismal Injury and Abnormalities, Psychological Disorders, Renal and Urological Disease, Reproductive System Disease, Skeletal and Muscular Disorders
ERBB2	v-erb-b2 avian erythroblastic leukemia viral oncogene homolog 2	Plasma Membrane	kinase	trastuzumab, BMS-599626, varlitinib, XL647, CP-724,714, afatinib, pertuzumab, sapitinib, trastuzumab emtansine, lapatinib/pazopanib, lapatinib/letrozole, paclitaxel/trastuzumab, capecitabine/lapatinib, docetaxel/pertuzumab/trastuzumab, cyclophosphamide/docetaxel/epirubicin/5-fluorouracil/trastuzumab, docetaxel/trastuzumab, paclitaxel/pertuzumab/trastuzumab, trastuzumab/vinorelbine, capecitabine/t…	P04626	x	diagnosis,disease progression,efficacy,prognosis,safety	Cancer, Cardiovascular Disease, Connective Tissue Disorders, Dermatological Diseases and Conditions, Developmental Disorder, Endocrine System Disorders, Gastrointestinal Disease, Hematological Disease, Hepatic System Disease, Hereditary Disorder, Immunological Disease, Inflammatory Disease, Inflammatory Response, Neurological Disease, Organismal Injury and Abnormalities, Renal and Urological Dise…
ERBB3	v-erb-b2 avian erythroblastic leukemia viral oncogene homolog 3	Plasma Membrane	kinase	sapitinib	P21860	x	efficacy,prognosis,safety	Cancer, Cardiovascular Disease, Connective Tissue Disorders, Dermatological Diseases and Conditions, Developmental Disorder, Endocrine System Disorders, Gastrointestinal Disease, Hematological Disease, Hepatic System Disease, Hereditary Disorder, Immunological Disease, Inflammatory Response, Metabolic Disease, Neurological Disease, Organismal Injury and Abnormalities, Psychological Disorders, Ren…
ERBB4	v-erb-b2 avian erythroblastic leukemia viral oncogene homolog 4	Plasma Membrane	kinase	BMS-599626, afatinib	Q15303	x	efficacy,safety	Auditory Disease, Cancer, Gastrointestinal Disease, Hereditary Disorder, Neurological Disease, Organismal Injury and Abnormalities, Psychological Disorders, Reproductive System Disease, Respiratory Disease
ERCC5	excision repair cross-complementing rodent repair deficiency, complementation group 5	Nucleus	enzyme		P28715	x	diagnosis,response to therapy	Cancer, Dermatological Diseases and Conditions, Developmental Disorder, Gastrointestinal Disease, Hereditary Disorder, Infectious Disease, Neurological Disease, Organismal Injury and Abnormalities, Renal and Urological Disease
ESR1	estrogen receptor 1	Nucleus	ligand-dependent nuclear receptor	17-alpha-ethinylestradiol, fulvestrant, beta-estradiol, estradiol 17beta-cypionate, estriol, estrone, estradiol valerate, mestranol, 3-(4-methoxy)phenyl-4-((4-(2-(1-piperidinyl)ethoxy)phenyl)methyl)-2H-1-benzopyran-7-ol, bazedoxifene, estradiol valerate/testosterone enanthate, TAS-108, ethynodiol diacetate, ethinyl estradiol/ethynodiol diacetate, estradiol acetate, esterified estrogens, estradiol…	P03372	x	diagnosis,disease progression,efficacy,prognosis,response to therapy	Cancer, Cardiovascular Disease, Connective Tissue Disorders, Dermatological Diseases and Conditions, Developmental Disorder, Endocrine System Disorders, Gastrointestinal Disease, Hematological Disease, Hepatic System Disease, Hereditary Disorder, Immunological Disease, Infectious Disease, Inflammatory Disease, Inflammatory Response, Metabolic Disease, Neurological Disease, Nutritional Disease, Op…
ESR2	estrogen receptor 2 (ER beta)	Nucleus	ligand-dependent nuclear receptor	17-alpha-ethinylestradiol, fulvestrant, beta-estradiol, estradiol 17beta-cypionate, estrone, estradiol valerate, 3-(4-methoxy)phenyl-4-((4-(2-(1-piperidinyl)ethoxy)phenyl)methyl)-2H-1-benzopyran-7-ol, bazedoxifene, estradiol valerate/testosterone enanthate, TAS-108, ethinyl estradiol/ethynodiol diacetate, estradiol acetate, esterified estrogens, estradiol cypionate/medroxyprogesterone acetate, co…	Q92731	x	diagnosis,efficacy,prognosis,response to therapy	Cancer, Cardiovascular Disease, Connective Tissue Disorders, Dermatological Diseases and Conditions, Developmental Disorder, Endocrine System Disorders, Gastrointestinal Disease, Hematological Disease, Hepatic System Disease, Hereditary Disorder, Immunological Disease, Infectious Disease, Inflammatory Disease, Inflammatory Response, Metabolic Disease, Neurological Disease, Nutritional Disease, Or…
ESRRA	estrogen-related receptor alpha	Nucleus	ligand-dependent nuclear receptor		P11474	x	diagnosis	Cancer, Cardiovascular Disease, Connective Tissue Disorders, Developmental Disorder, Endocrine System Disorders, Gastrointestinal Disease, Hereditary Disorder, Immunological Disease, Inflammatory Disease, Metabolic Disease, Nutritional Disease, Organismal Injury and Abnormalities, Reproductive System Disease, Respiratory Disease, Skeletal and Muscular Disorders
ETS1	v-ets avian erythroblastosis virus E26 oncogene homolog 1	Nucleus	transcription regulator		P14921	x	unspecified application	Cancer, Cardiovascular Disease, Developmental Disorder, Endocrine System Disorders, Gastrointestinal Disease, Hematological Disease, Immunological Disease, Inflammatory Disease, Inflammatory Response, Metabolic Disease, Organismal Injury and Abnormalities, Reproductive System Disease
ETS2	v-ets avian erythroblastosis virus E26 oncogene homolog 2	Nucleus	transcription regulator		P15036	x	efficacy	Cancer, Cardiovascular Disease, Developmental Disorder, Hereditary Disorder, Infectious Disease, Inflammatory Response, Metabolic Disease, Neurological Disease, Organismal Injury and Abnormalities, Psychological Disorders, Renal and Urological Disease, Reproductive System Disease
ETV4	ets variant 4	Nucleus	transcription regulator		P43268	x	unspecified application	Cancer, Endocrine System Disorders, Gastrointestinal Disease, Hepatic System Disease, Hereditary Disorder, Neurological Disease, Organismal Injury and Abnormalities, Psychological Disorders, Reproductive System Disease, Skeletal and Muscular Disorders
EXO1	exonuclease 1	Nucleus	enzyme		Q9UQ84	x	diagnosis	Cancer, Gastrointestinal Disease, Hematological Disease, Immunological Disease, Organismal Injury and Abnormalities, Reproductive System Disease
F5	coagulation factor V (proaccelerin, labile factor)	Plasma Membrane	enzyme	drotrecogin alfa, antithrombin alfa	P12259	x	diagnosis	Cancer, Cardiovascular Disease, Developmental Disorder, Endocrine System Disorders, Gastrointestinal Disease, Hematological Disease, Hepatic System Disease, Hereditary Disorder, Hypersensitivity Response, Infectious Disease, Inflammatory Disease, Inflammatory Response, Neurological Disease, Organismal Injury and Abnormalities, Reproductive System Disease, Respiratory Disease
F11R	F11 receptor	Plasma Membrane	other		Q9Y624	x	unspecified application	Cancer, Connective Tissue Disorders, Gastrointestinal Disease, Hematological Disease, Hereditary Disorder, Immunological Disease, Infectious Disease, Inflammatory Disease, Inflammatory Response, Neurological Disease, Organismal Injury and Abnormalities, Psychological Disorders, Reproductive System Disease, Skeletal and Muscular Disorders
F2R	coagulation factor II (thrombin) receptor	Plasma Membrane	G-protein coupled receptor	chrysalin, argatroban, bivalirudin	P25116	x	disease progression	Cancer, Cardiovascular Disease, Connective Tissue Disorders, Developmental Disorder, Endocrine System Disorders, Gastrointestinal Disease, Hematological Disease, Hepatic System Disease, Hypersensitivity Response, Immunological Disease, Infectious Disease, Inflammatory Disease, Inflammatory Response, Metabolic Disease, Neurological Disease, Ophthalmic Disease, Organismal Injury and Abnormalities, …
FADD	Fas (TNFRSF6)-associated via death domain	Cytoplasm	other		Q13158	x	diagnosis,disease progression	Cancer, Cardiovascular Disease, Dermatological Diseases and Conditions, Developmental Disorder, Endocrine System Disorders, Gastrointestinal Disease, Hematological Disease, Hepatic System Disease, Hereditary Disorder, Immunological Disease, Infectious Disease, Inflammatory Response, Metabolic Disease, Neurological Disease, Organismal Injury and Abnormalities, Reproductive System Disease, Respirat…
FAM117A	family with sequence similarity 117, member A	Other	transporter		Q9C073	x	unspecified application	Hereditary Disorder, Neurological Disease, Psychological Disorders, Skeletal and Muscular Disorders
FAS	Fas cell surface death receptor	Plasma Membrane	transmembrane receptor	pyrazinamide	P25445	x	diagnosis,disease progression,efficacy	Antimicrobial Response, Cancer, Cardiovascular Disease, Connective Tissue Disorders, Dermatological Diseases and Conditions, Developmental Disorder, Endocrine System Disorders, Gastrointestinal Disease, Hematological Disease, Hepatic System Disease, Hereditary Disorder, Hypersensitivity Response, Immunological Disease, Infectious Disease, Inflammatory Disease, Inflammatory Response, Metabolic Dis…
FASN	fatty acid synthase	Cytoplasm	enzyme	orlistat, cerulenin	P49327	x	diagnosis,efficacy	Cancer, Cardiovascular Disease, Connective Tissue Disorders, Dermatological Diseases and Conditions, Endocrine System Disorders, Gastrointestinal Disease, Hematological Disease, Hepatic System Disease, Immunological Disease, Infectious Disease, Inflammatory Disease, Metabolic Disease, Neurological Disease, Nutritional Disease, Organismal Injury and Abnormalities, Psychological Disorders, Reproduc…
FBXW7	F-box and WD repeat domain containing 7, E3 ubiquitin protein ligase	Nucleus	transcription regulator		Q969H0	x	unspecified application	Cancer, Cardiovascular Disease, Developmental Disorder, Gastrointestinal Disease, Hematological Disease, Hepatic System Disease, Hereditary Disorder, Immunological Disease, Neurological Disease, Organismal Injury and Abnormalities, Psychological Disorders, Renal and Urological Disease, Reproductive System Disease, Respiratory Disease, Skeletal and Muscular Disorders
FERMT2	fermitin family member 2	Cytoplasm	other		Q96AC1	x	disease progression	Cancer, Cardiovascular Disease, Organismal Injury and Abnormalities, Reproductive System Disease
FGA	fibrinogen alpha chain	Extracellular Space	other	F2	P02671	x	diagnosis	Cancer, Cardiovascular Disease, Connective Tissue Disorders, Dermatological Diseases and Conditions, Developmental Disorder, Gastrointestinal Disease, Hematological Disease, Hepatic System Disease, Hereditary Disorder, Immunological Disease, Infectious Disease, Inflammatory Disease, Inflammatory Response, Metabolic Disease, Organismal Injury and Abnormalities, Psychological Disorders, Renal and U…
FGFR2	fibroblast growth factor receptor 2	Plasma Membrane	kinase	regorafenib, dexamethasone/thalidomide, bortezomib/dexamethasone/thalidomide, rituximab/thalidomide, bortezomib/thalidomide, prednisone/thalidomide, thalidomide, palifermin	P21802	x	diagnosis,response to therapy	Cancer, Connective Tissue Disorders, Dermatological Diseases and Conditions, Developmental Disorder, Endocrine System Disorders, Gastrointestinal Disease, Hematological Disease, Hepatic System Disease, Hereditary Disorder, Immunological Disease, Infectious Disease, Inflammatory Disease, Inflammatory Response, Metabolic Disease, Neurological Disease, Nutritional Disease, Ophthalmic Disease, Organi…
FGFR3	fibroblast growth factor receptor 3	Plasma Membrane	kinase	pazopanib	P22607	x	prognosis	Auditory Disease, Cancer, Connective Tissue Disorders, Dermatological Diseases and Conditions, Developmental Disorder, Endocrine System Disorders, Gastrointestinal Disease, Hematological Disease, Hepatic System Disease, Hereditary Disorder, Immunological Disease, Inflammatory Disease, Neurological Disease, Organismal Injury and Abnormalities, Renal and Urological Disease, Reproductive System Dise…
FHIT	fragile histidine triad	Cytoplasm	enzyme		P49789	x	efficacy	Cancer, Dermatological Diseases and Conditions, Gastrointestinal Disease, Hematological Disease, Hepatic System Disease, Immunological Disease, Inflammatory Disease, Neurological Disease, Organismal Injury and Abnormalities, Reproductive System Disease, Respiratory Disease, Skeletal and Muscular Disorders
FLNA	filamin A, alpha	Cytoplasm	other		P21333	x	unspecified application	Cancer, Cardiovascular Disease, Connective Tissue Disorders, Dermatological Diseases and Conditions, Developmental Disorder, Gastrointestinal Disease, Hematological Disease, Hereditary Disorder, Immunological Disease, Infectious Disease, Inflammatory Disease, Inflammatory Response, Metabolic Disease, Neurological Disease, Organismal Injury and Abnormalities, Reproductive System Disease, Respirato…
FLNB	filamin B, beta	Cytoplasm	other		O75369	x	unspecified application	Cancer, Connective Tissue Disorders, Developmental Disorder, Gastrointestinal Disease, Hereditary Disorder, Organismal Injury and Abnormalities, Reproductive System Disease, Skeletal and Muscular Disorders
FLT3	fms-related tyrosine kinase 3	Plasma Membrane	kinase	sunitinib, dovitinib, tandutinib, cabozantinib, ponatinib, bortezomib/sorafenib, dexamethasone/lenalidomide/sorafenib, bevacizumab/sorafenib, sorafenib, lestaurtinib, midostaurin	P36888	x	efficacy,prognosis	Cancer, Cardiovascular Disease, Connective Tissue Disorders, Endocrine System Disorders, Gastrointestinal Disease, Hematological Disease, Hepatic System Disease, Immunological Disease, Inflammatory Disease, Inflammatory Response, Organismal Injury and Abnormalities, Renal and Urological Disease, Reproductive System Disease, Respiratory Disease, Skeletal and Muscular Disorders
FLT4	fms-related tyrosine kinase 4	Plasma Membrane	transmembrane receptor	sunitinib, pazopanib, axitinib, CEP 7055, tivozanib, motesanib, telatinib, cabozantinib, regorafenib, bortezomib/sorafenib, dexamethasone/lenalidomide/sorafenib, bevacizumab/sorafenib, sorafenib, vandetanib	P35916	x	diagnosis,disease progression,efficacy,prognosis	Cancer, Cardiovascular Disease, Connective Tissue Disorders, Dermatological Diseases and Conditions, Endocrine System Disorders, Gastrointestinal Disease, Hepatic System Disease, Hereditary Disorder, Immunological Disease, Inflammatory Disease, Inflammatory Response, Organismal Injury and Abnormalities, Renal and Urological Disease, Reproductive System Disease, Respiratory Disease, Skeletal and M…
FN1	fibronectin 1	Extracellular Space	enzyme		P02751	x	diagnosis,efficacy,prognosis,unspecified application	Cancer, Cardiovascular Disease, Connective Tissue Disorders, Dermatological Diseases and Conditions, Developmental Disorder, Endocrine System Disorders, Gastrointestinal Disease, Hematological Disease, Hepatic System Disease, Hereditary Disorder, Hypersensitivity Response, Immunological Disease, Infectious Disease, Inflammatory Disease, Inflammatory Response, Metabolic Disease, Neurological Disea…
FOXG1	forkhead box G1	Nucleus	transcription regulator		P55316	x	prognosis	Cancer, Developmental Disorder, Endocrine System Disorders, Hereditary Disorder, Neurological Disease, Organismal Injury and Abnormalities, Psychological Disorders, Renal and Urological Disease, Reproductive System Disease, Skeletal and Muscular Disorders
FOXM1	forkhead box M1	Nucleus	transcription regulator		Q08050	x	prognosis	Cancer, Cardiovascular Disease, Developmental Disorder, Gastrointestinal Disease, Hematological Disease, Hepatic System Disease, Inflammatory Disease, Neurological Disease, Organismal Injury and Abnormalities, Reproductive System Disease, Respiratory Disease, Skeletal and Muscular Disorders
FOXO3	forkhead box O3	Nucleus	transcription regulator		O43524	x	efficacy	Cancer, Cardiovascular Disease, Connective Tissue Disorders, Dermatological Diseases and Conditions, Developmental Disorder, Endocrine System Disorders, Gastrointestinal Disease, Hematological Disease, Hepatic System Disease, Hereditary Disorder, Immunological Disease, Inflammatory Disease, Inflammatory Response, Metabolic Disease, Neurological Disease, Organismal Injury and Abnormalities, Renal …
FTH1	ferritin, heavy polypeptide 1	Cytoplasm	enzyme		P02794	x	unspecified application	Cancer, Cardiovascular Disease, Connective Tissue Disorders, Dermatological Diseases and Conditions, Gastrointestinal Disease, Immunological Disease, Inflammatory Disease, Neurological Disease, Organismal Injury and Abnormalities, Psychological Disorders, Reproductive System Disease, Skeletal and Muscular Disorders
FYN	FYN oncogene related to SRC, FGR, YES	Plasma Membrane	kinase	dasatinib	P06241	x	efficacy	Cancer, Dermatological Diseases and Conditions, Developmental Disorder, Hematological Disease, Hypersensitivity Response, Immunological Disease, Inflammatory Disease, Inflammatory Response, Neurological Disease, Nutritional Disease, Organismal Injury and Abnormalities, Renal and Urological Disease, Reproductive System Disease
GAPDH	glyceraldehyde-3-phosphate dehydrogenase	Cytoplasm	enzyme		P04406	x	diagnosis,unspecified application	Cancer, Dermatological Diseases and Conditions, Endocrine System Disorders, Hematological Disease, Hereditary Disorder, Immunological Disease, Infectious Disease, Inflammatory Disease, Inflammatory Response, Metabolic Disease, Neurological Disease, Organismal Injury and Abnormalities, Psychological Disorders, Reproductive System Disease, Respiratory Disease, Skeletal and Muscular Disorders
GART	phosphoribosylglycinamide formyltransferase, phosphoribosylglycinamide synthetase, phosphoribosylaminoimidazole synthetase	Cytoplasm	enzyme	bevacizumab/pemetrexed, pemetrexed	P22102	x	prognosis,safety	Cancer, Endocrine System Disorders, Gastrointestinal Disease, Organismal Injury and Abnormalities, Renal and Urological Disease, Reproductive System Disease, Respiratory Disease
GFAP	glial fibrillary acidic protein	Cytoplasm	other		P14136	x	diagnosis	Cancer, Connective Tissue Disorders, Developmental Disorder, Endocrine System Disorders, Gastrointestinal Disease, Hematological Disease, Hereditary Disorder, Immunological Disease, Inflammatory Disease, Inflammatory Response, Metabolic Disease, Neurological Disease, Ophthalmic Disease, Organismal Injury and Abnormalities, Psychological Disorders, Reproductive System Disease, Skeletal and Muscula…
GJB1	gap junction protein, beta 1, 32kDa	Plasma Membrane	transporter		P08034	x	unspecified application	Cancer, Endocrine System Disorders, Gastrointestinal Disease, Hepatic System Disease, Hereditary Disorder, Neurological Disease, Organismal Injury and Abnormalities, Reproductive System Disease, Respiratory Disease, Skeletal and Muscular Disorders
GJB2	gap junction protein, beta 2, 26kDa	Plasma Membrane	transporter		P29033	x	disease progression	Auditory Disease, Cancer, Dermatological Diseases and Conditions, Developmental Disorder, Gastrointestinal Disease, Hepatic System Disease, Hereditary Disorder, Inflammatory Response, Neurological Disease, Organismal Injury and Abnormalities, Renal and Urological Disease, Reproductive System Disease, Skeletal and Muscular Disorders
GLI1	GLI family zinc finger 1	Nucleus	transcription regulator		P08151	x	efficacy	Cancer, Connective Tissue Disorders, Dermatological Diseases and Conditions, Developmental Disorder, Endocrine System Disorders, Gastrointestinal Disease, Hematological Disease, Hepatic System Disease, Immunological Disease, Neurological Disease, Organismal Injury and Abnormalities, Reproductive System Disease, Respiratory Disease, Skeletal and Muscular Disorders
GLI2	GLI family zinc finger 2	Nucleus	transcription regulator		P10070	x	efficacy	Cancer, Connective Tissue Disorders, Dermatological Diseases and Conditions, Developmental Disorder, Endocrine System Disorders, Gastrointestinal Disease, Hereditary Disorder, Inflammatory Disease, Inflammatory Response, Neurological Disease, Organismal Injury and Abnormalities, Reproductive System Disease, Respiratory Disease, Skeletal and Muscular Disorders
GLI3	GLI family zinc finger 3	Nucleus	transcription regulator		P10071	x	efficacy	Cancer, Connective Tissue Disorders, Developmental Disorder, Endocrine System Disorders, Gastrointestinal Disease, Hereditary Disorder, Neurological Disease, Organismal Injury and Abnormalities, Renal and Urological Disease, Reproductive System Disease, Respiratory Disease, Skeletal and Muscular Disorders
GMNN	geminin, DNA replication inhibitor	Nucleus	transcription regulator		O75496	x	unspecified application	Cancer, Gastrointestinal Disease, Organismal Injury and Abnormalities, Renal and Urological Disease, Reproductive System Disease
GNA12	guanine nucleotide binding protein (G protein) alpha 12	Plasma Membrane	enzyme		Q03113	x	response to therapy	Cancer, Cardiovascular Disease, Developmental Disorder, Endocrine System Disorders, Gastrointestinal Disease, Inflammatory Response, Neurological Disease, Organismal Injury and Abnormalities, Reproductive System Disease
GNB3	guanine nucleotide binding protein (G protein), beta polypeptide 3	Plasma Membrane	enzyme		P16520	x	safety,unspecified application	Cancer, Cardiovascular Disease, Endocrine System Disorders, Hereditary Disorder, Metabolic Disease, Neurological Disease, Nutritional Disease, Organismal Injury and Abnormalities, Renal and Urological Disease
GPRC5C	G protein-coupled receptor, family C, group 5, member C	Plasma Membrane	G-protein coupled receptor		Q9NQ84	x	unspecified application	Cancer, Hereditary Disorder, Neurological Disease, Psychological Disorders, Skeletal and Muscular Disorders
GRIN2A	glutamate receptor, ionotropic, N-methyl D-aspartate 2A	Plasma Membrane	ion channel	dextromethorphan/guaifenesin, dextromethorphan/morphine, neramexane, bicifadine, delucemine, CR 2249, besonprodil, UK-240455, tenocyclidine, dextromethorphan/quinidine, ketamine, felbamate, memantine, orphenadrine, cycloserine, N-(2-indanyl)glycinamide, dextromethorphan, brompheniramine/dextromethorphan/pseudoephedrine, chlorpheniramine/dextromethorphan/phenylephrine, carbinoxamine/dextromethorph…	Q12879	x	unspecified application	Cancer, Cardiovascular Disease, Connective Tissue Disorders, Dermatological Diseases and Conditions, Developmental Disorder, Endocrine System Disorders, Gastrointestinal Disease, Hematological Disease, Hereditary Disorder, Immunological Disease, Infectious Disease, Inflammatory Disease, Metabolic Disease, Neurological Disease, Nutritional Disease, Ophthalmic Disease, Organismal Injury and Abnorma…
GRIN2B	glutamate receptor, ionotropic, N-methyl D-aspartate 2B	Plasma Membrane	ion channel	dextromethorphan/guaifenesin, dextromethorphan/morphine, neramexane, bicifadine, delucemine, CR 2249, besonprodil, UK-240455, tenocyclidine, dextromethorphan/quinidine, ketamine, felbamate, memantine, orphenadrine, cycloserine, N-(2-indanyl)glycinamide, dextromethorphan, brompheniramine/dextromethorphan/pseudoephedrine, chlorpheniramine/dextromethorphan/phenylephrine, carbinoxamine/dextromethorph…	Q13224	x	diagnosis,unspecified application	Cancer, Cardiovascular Disease, Dermatological Diseases and Conditions, Developmental Disorder, Endocrine System Disorders, Gastrointestinal Disease, Hematological Disease, Hepatic System Disease, Hereditary Disorder, Infectious Disease, Inflammatory Disease, Metabolic Disease, Neurological Disease, Nutritional Disease, Ophthalmic Disease, Organismal Injury and Abnormalities, Psychological Disord…
GSK3B	glycogen synthase kinase 3 beta	Nucleus	kinase	enzastaurin	P49841	x	efficacy	Antimicrobial Response, Cancer, Cardiovascular Disease, Connective Tissue Disorders, Dermatological Diseases and Conditions, Developmental Disorder, Endocrine System Disorders, Gastrointestinal Disease, Hematological Disease, Hepatic System Disease, Hereditary Disorder, Immunological Disease, Infectious Disease, Inflammatory Response, Metabolic Disease, Neurological Disease, Organismal Injury and…
GSN	gelsolin	Extracellular Space	other		P06396	x	disease progression,efficacy	Cancer, Cardiovascular Disease, Connective Tissue Disorders, Dermatological Diseases and Conditions, Developmental Disorder, Gastrointestinal Disease, Hematological Disease, Hereditary Disorder, Immunological Disease, Inflammatory Disease, Inflammatory Response, Metabolic Disease, Neurological Disease, Ophthalmic Disease, Organismal Injury and Abnormalities, Psychological Disorders, Renal and Uro…
GSTM2	glutathione S-transferase mu 2 (muscle)	Cytoplasm	enzyme		P28161	x	diagnosis,prognosis	Auditory Disease, Cancer, Organismal Injury and Abnormalities, Reproductive System Disease
GYPC	glycophorin C (Gerbich blood group)	Plasma Membrane	other		P04921	x	unspecified application	Cancer, Cardiovascular Disease, Hereditary Disorder, Neurological Disease, Organismal Injury and Abnormalities, Psychological Disorders, Renal and Urological Disease, Skeletal and Muscular Disorders
HADH	hydroxyacyl-CoA dehydrogenase	Cytoplasm	enzyme		Q16836	x	unspecified application	Endocrine System Disorders, Gastrointestinal Disease, Hereditary Disorder, Metabolic Disease, Neurological Disease, Organismal Injury and Abnormalities, Psychological Disorders, Renal and Urological Disease, Skeletal and Muscular Disorders
HGD	homogentisate 1,2-dioxygenase	Cytoplasm	enzyme		Q93099	x	diagnosis	Cancer, Developmental Disorder, Hereditary Disorder, Metabolic Disease, Organismal Injury and Abnormalities
HIF1A	hypoxia inducible factor 1, alpha subunit (basic helix-loop-helix transcription factor)	Nucleus	transcription regulator		Q16665	x	diagnosis,efficacy,prognosis,response to therapy	Cancer, Cardiovascular Disease, Connective Tissue Disorders, Dermatological Diseases and Conditions, Developmental Disorder, Endocrine System Disorders, Gastrointestinal Disease, Hematological Disease, Hepatic System Disease, Hereditary Disorder, Hypersensitivity Response, Immunological Disease, Inflammatory Disease, Inflammatory Response, Metabolic Disease, Neurological Disease, Nutritional Dise…
HLA-B	major histocompatibility complex, class I, B	Plasma Membrane	transmembrane receptor		P01889	x	safety	Antimicrobial Response, Cancer, Cardiovascular Disease, Connective Tissue Disorders, Dermatological Diseases and Conditions, Endocrine System Disorders, Gastrointestinal Disease, Hematological Disease, Hepatic System Disease, Immunological Disease, Infectious Disease, Inflammatory Disease, Inflammatory Response, Metabolic Disease, Neurological Disease, Organismal Injury and Abnormalities, Psychol…
HLA-C	major histocompatibility complex, class I, C	Plasma Membrane	other		P10321	x	response to therapy	Cancer, Connective Tissue Disorders, Dermatological Diseases and Conditions, Developmental Disorder, Endocrine System Disorders, Gastrointestinal Disease, Hereditary Disorder, Immunological Disease, Infectious Disease, Inflammatory Disease, Inflammatory Response, Metabolic Disease, Organismal Injury and Abnormalities, Reproductive System Disease, Respiratory Disease, Skeletal and Muscular Disorde…
HLTF	helicase-like transcription factor	Nucleus	transcription regulator		Q14527	x	diagnosis	Cancer, Connective Tissue Disorders, Endocrine System Disorders, Gastrointestinal Disease, Inflammatory Disease, Organismal Injury and Abnormalities, Reproductive System Disease, Skeletal and Muscular Disorders
HMGA1	high mobility group AT-hook 1	Nucleus	transcription regulator		P17096	x	unspecified application	Cancer, Endocrine System Disorders, Gastrointestinal Disease, Hematological Disease, Immunological Disease, Infectious Disease, Metabolic Disease, Neurological Disease, Organismal Injury and Abnormalities, Psychological Disorders, Reproductive System Disease, Skeletal and Muscular Disorders
HMGB1	high mobility group box 1	Nucleus	transcription regulator		P09429	x	diagnosis	Cancer, Cardiovascular Disease, Connective Tissue Disorders, Dermatological Diseases and Conditions, Developmental Disorder, Endocrine System Disorders, Gastrointestinal Disease, Hematological Disease, Hepatic System Disease, Hypersensitivity Response, Immunological Disease, Infectious Disease, Inflammatory Disease, Inflammatory Response, Metabolic Disease, Neurological Disease, Nutritional Disea…
HMGB2	high mobility group box 2	Nucleus	transcription regulator		P26583	x	unspecified application	Cancer, Gastrointestinal Disease, Hereditary Disorder, Neurological Disease, Psychological Disorders, Skeletal and Muscular Disorders
HN1	hematological and neurological expressed 1	Nucleus	other		Q9UK76	x	unspecified application	Cancer, Dermatological Diseases and Conditions, Endocrine System Disorders, Immunological Disease, Inflammatory Disease, Inflammatory Response, Neurological Disease, Organismal Injury and Abnormalities, Reproductive System Disease
HNF4A	hepatocyte nuclear factor 4, alpha	Nucleus	transcription regulator		P41235	x	unspecified application	Cancer, Developmental Disorder, Endocrine System Disorders, Gastrointestinal Disease, Hepatic System Disease, Hereditary Disorder, Infectious Disease, Inflammatory Response, Metabolic Disease, Neurological Disease, Organismal Injury and Abnormalities, Psychological Disorders, Reproductive System Disease, Respiratory Disease
HNRNPH1	heterogeneous nuclear ribonucleoprotein H1 (H)	Nucleus	other		P31943	x	diagnosis	Cancer, Gastrointestinal Disease, Infectious Disease, Organismal Injury and Abnormalities, Renal and Urological Disease, Reproductive System Disease
HNRNPK	heterogeneous nuclear ribonucleoprotein K	Nucleus	other		P61978	x	prognosis	Cancer, Gastrointestinal Disease, Hepatic System Disease, Infectious Disease, Inflammatory Disease, Organismal Injury and Abnormalities, Renal and Urological Disease, Reproductive System Disease
HNRNPU	heterogeneous nuclear ribonucleoprotein U (scaffold attachment factor A)	Nucleus	transporter		Q00839	x	unspecified application	Cancer, Cardiovascular Disease, Connective Tissue Disorders, Developmental Disorder, Endocrine System Disorders, Hereditary Disorder, Infectious Disease, Metabolic Disease, Neurological Disease, Organismal Injury and Abnormalities, Psychological Disorders, Reproductive System Disease, Skeletal and Muscular Disorders
HOXB2	homeobox B2	Nucleus	transcription regulator		P14652	x	diagnosis	Cancer, Endocrine System Disorders, Gastrointestinal Disease, Neurological Disease, Organismal Injury and Abnormalities, Reproductive System Disease, Respiratory Disease, Skeletal and Muscular Disorders
HPS1	Hermansky-Pudlak syndrome 1	Cytoplasm	other		Q92902	x	diagnosis	Cancer, Dermatological Diseases and Conditions, Developmental Disorder, Hereditary Disorder, Inflammatory Response, Metabolic Disease, Ophthalmic Disease, Organismal Injury and Abnormalities
HPS3	Hermansky-Pudlak syndrome 3	Cytoplasm	other		Q969F9	x	diagnosis	Cancer, Dermatological Diseases and Conditions, Developmental Disorder, Endocrine System Disorders, Gastrointestinal Disease, Hereditary Disorder, Metabolic Disease, Ophthalmic Disease, Organismal Injury and Abnormalities, Renal and Urological Disease, Reproductive System Disease
HPS5	Hermansky-Pudlak syndrome 5	Cytoplasm	other		Q9UPZ3	x	diagnosis	Cancer, Dermatological Diseases and Conditions, Developmental Disorder, Hereditary Disorder, Metabolic Disease, Ophthalmic Disease, Organismal Injury and Abnormalities
HPSE	heparanase	Plasma Membrane	enzyme	heparanase inhibitor PI-88	Q9Y251	x	efficacy	Cancer, Cardiovascular Disease, Dermatological Diseases and Conditions, Endocrine System Disorders, Gastrointestinal Disease, Hepatic System Disease, Immunological Disease, Inflammatory Response, Metabolic Disease, Organismal Injury and Abnormalities, Renal and Urological Disease, Reproductive System Disease, Skeletal and Muscular Disorders
HSP90AA1	heat shock protein 90kDa alpha (cytosolic), class A member 1	Cytoplasm	enzyme	alvespimycin, retaspimycin, luminespib, cisplatin	P07900	x	safety,unspecified application	Cancer, Connective Tissue Disorders, Endocrine System Disorders, Gastrointestinal Disease, Hepatic System Disease, Hereditary Disorder, Immunological Disease, Infectious Disease, Inflammatory Response, Neurological Disease, Organismal Injury and Abnormalities, Psychological Disorders, Renal and Urological Disease, Reproductive System Disease, Respiratory Disease, Skeletal and Muscular Disorders
HSPA4	heat shock 70kDa protein 4	Cytoplasm	other		P34932	x	efficacy	Cancer, Cardiovascular Disease, Inflammatory Response, Organismal Injury and Abnormalities, Reproductive System Disease
HSPA5	heat shock 70kDa protein 5 (glucose-regulated protein, 78kDa)	Cytoplasm	enzyme		P11021	x	unspecified application	Cancer, Connective Tissue Disorders, Dermatological Diseases and Conditions, Developmental Disorder, Gastrointestinal Disease, Hematological Disease, Hepatic System Disease, Hereditary Disorder, Immunological Disease, Infectious Disease, Inflammatory Disease, Inflammatory Response, Metabolic Disease, Neurological Disease, Organismal Injury and Abnormalities, Psychological Disorders, Renal and Uro…
HSPA8	heat shock 70kDa protein 8	Cytoplasm	enzyme		P11142	x	diagnosis	Antimicrobial Response, Cancer, Connective Tissue Disorders, Dermatological Diseases and Conditions, Gastrointestinal Disease, Hepatic System Disease, Hereditary Disorder, Immunological Disease, Inflammatory Disease, Inflammatory Response, Neurological Disease, Psychological Disorders, Skeletal and Muscular Disorders
HSPA1L	heat shock 70kDa protein 1-like	Other	other		P34931	x	safety	Cancer, Connective Tissue Disorders, Endocrine System Disorders, Gastrointestinal Disease, Immunological Disease, Inflammatory Disease, Metabolic Disease, Neurological Disease, Skeletal and Muscular Disorders
HSPB1	heat shock 27kDa protein 1	Cytoplasm	other		P04792	x	diagnosis,efficacy	Cancer, Cardiovascular Disease, Endocrine System Disorders, Gastrointestinal Disease, Hepatic System Disease, Hereditary Disorder, Inflammatory Response, Metabolic Disease, Neurological Disease, Organismal Injury and Abnormalities, Psychological Disorders, Reproductive System Disease, Skeletal and Muscular Disorders
HSPD1	heat shock 60kDa protein 1 (chaperonin)	Cytoplasm	enzyme		P10809	x	diagnosis,prognosis	Cancer, Connective Tissue Disorders, Hematological Disease, Hereditary Disorder, Immunological Disease, Infectious Disease, Inflammatory Disease, Inflammatory Response, Metabolic Disease, Neurological Disease, Ophthalmic Disease, Organismal Injury and Abnormalities, Psychological Disorders, Reproductive System Disease, Respiratory Disease, Skeletal and Muscular Disorders
HSPG2	heparan sulfate proteoglycan 2	Extracellular Space	enzyme		P98160	x	unspecified application	Cancer, Cardiovascular Disease, Connective Tissue Disorders, Dermatological Diseases and Conditions, Developmental Disorder, Gastrointestinal Disease, Hereditary Disorder, Inflammatory Disease, Inflammatory Response, Metabolic Disease, Neurological Disease, Ophthalmic Disease, Organismal Injury and Abnormalities, Psychological Disorders, Reproductive System Disease, Respiratory Disease, Skeletal …
HTT	huntingtin	Cytoplasm	transcription regulator		P42858	x	unspecified application	Cancer, Cardiovascular Disease, Connective Tissue Disorders, Dermatological Diseases and Conditions, Developmental Disorder, Endocrine System Disorders, Gastrointestinal Disease, Hematological Disease, Hepatic System Disease, Hereditary Disorder, Immunological Disease, Inflammatory Disease, Inflammatory Response, Metabolic Disease, Neurological Disease, Nutritional Disease, Ophthalmic Disease, Or…
HUWE1	HECT, UBA and WWE domain containing 1, E3 ubiquitin protein ligase	Nucleus	transcription regulator		Q7Z6Z7	x	unspecified application	Cancer, Cardiovascular Disease, Dermatological Diseases and Conditions, Developmental Disorder, Endocrine System Disorders, Gastrointestinal Disease, Hematological Disease, Hepatic System Disease, Hereditary Disorder, Immunological Disease, Infectious Disease, Metabolic Disease, Neurological Disease, Organismal Injury and Abnormalities, Psychological Disorders, Reproductive System Disease, Respir…
ICAM1	intercellular adhesion molecule 1	Plasma Membrane	transmembrane receptor		P05362	x	diagnosis,efficacy,prognosis,unspecified application	Antimicrobial Response, Auditory Disease, Cancer, Cardiovascular Disease, Connective Tissue Disorders, Dermatological Diseases and Conditions, Developmental Disorder, Endocrine System Disorders, Gastrointestinal Disease, Hematological Disease, Hepatic System Disease, Hereditary Disorder, Hypersensitivity Response, Immunological Disease, Infectious Disease, Inflammatory Disease, Inflammatory Respo…
IGF1R	insulin-like growth factor 1 receptor	Plasma Membrane	transmembrane receptor	linsitinib, cixutumumab, ganitumab, AVE1642, BIIB022, IGF1	P08069	x	diagnosis,efficacy,prognosis	Cancer, Cardiovascular Disease, Dermatological Diseases and Conditions, Developmental Disorder, Endocrine System Disorders, Gastrointestinal Disease, Hematological Disease, Hepatic System Disease, Hereditary Disorder, Immunological Disease, Infectious Disease, Inflammatory Disease, Inflammatory Response, Metabolic Disease, Neurological Disease, Nutritional Disease, Organismal Injury and Abnormali…
IGF2BP3	insulin-like growth factor 2 mRNA binding protein 3	Cytoplasm	translation regulator		O00425	x	diagnosis	Cancer, Endocrine System Disorders, Organismal Injury and Abnormalities, Renal and Urological Disease, Reproductive System Disease
IGFBP3	insulin-like growth factor binding protein 3	Extracellular Space	other		P17936	x	diagnosis,disease progression,efficacy,prognosis,safety	Cancer, Dermatological Diseases and Conditions, Endocrine System Disorders, Gastrointestinal Disease, Hematological Disease, Hepatic System Disease, Immunological Disease, Inflammatory Disease, Metabolic Disease, Neurological Disease, Nutritional Disease, Organismal Injury and Abnormalities, Psychological Disorders, Reproductive System Disease, Respiratory Disease
IKBKB	inhibitor of kappa light polypeptide gene enhancer in B-cells, kinase beta	Cytoplasm	kinase	auranofin	O14920	x	unspecified application	Antimicrobial Response, Cancer, Cardiovascular Disease, Connective Tissue Disorders, Dermatological Diseases and Conditions, Developmental Disorder, Endocrine System Disorders, Gastrointestinal Disease, Hematological Disease, Hepatic System Disease, Hereditary Disorder, Hypersensitivity Response, Immunological Disease, Infectious Disease, Inflammatory Disease, Inflammatory Response, Metabolic Dis…
IKZF1	IKAROS family zinc finger 1 (Ikaros)	Nucleus	transcription regulator		Q13422	x	efficacy	Cancer, Connective Tissue Disorders, Developmental Disorder, Gastrointestinal Disease, Hematological Disease, Hypersensitivity Response, Immunological Disease, Infectious Disease, Inflammatory Disease, Inflammatory Response, Respiratory Disease, Skeletal and Muscular Disorders
IL12B	interleukin 12B (natural killer cell stimulatory factor 2, cytotoxic lymphocyte maturation factor 2, p40)	Extracellular Space	cytokine	ustekinumab	P29460	x	diagnosis,efficacy	Antimicrobial Response, Cancer, Connective Tissue Disorders, Dermatological Diseases and Conditions, Endocrine System Disorders, Gastrointestinal Disease, Hematological Disease, Hepatic System Disease, Hereditary Disorder, Hypersensitivity Response, Immunological Disease, Infectious Disease, Inflammatory Disease, Inflammatory Response, Metabolic Disease, Neurological Disease, Ophthalmic Disease, …
IL1A	interleukin 1, alpha	Extracellular Space	cytokine		P01583	x	efficacy,prognosis,unspecified application	Cancer, Cardiovascular Disease, Connective Tissue Disorders, Dermatological Diseases and Conditions, Developmental Disorder, Endocrine System Disorders, Gastrointestinal Disease, Hematological Disease, Hepatic System Disease, Hereditary Disorder, Hypersensitivity Response, Immunological Disease, Infectious Disease, Inflammatory Disease, Inflammatory Response, Metabolic Disease, Neurological Disea…
IL4R	interleukin 4 receptor	Plasma Membrane	transmembrane receptor		P24394	x	response to therapy,unspecified application	Cancer, Connective Tissue Disorders, Dermatological Diseases and Conditions, Developmental Disorder, Gastrointestinal Disease, Hematological Disease, Hepatic System Disease, Hereditary Disorder, Hypersensitivity Response, Immunological Disease, Infectious Disease, Inflammatory Disease, Inflammatory Response, Metabolic Disease, Nutritional Disease, Ophthalmic Disease, Organismal Injury and Abnorma…
IL6ST	interleukin 6 signal transducer (gp130, oncostatin M receptor)	Plasma Membrane	transmembrane receptor		P40189	x	unspecified application	Cancer, Cardiovascular Disease, Connective Tissue Disorders, Developmental Disorder, Endocrine System Disorders, Gastrointestinal Disease, Hematological Disease, Hepatic System Disease, Hypersensitivity Response, Immunological Disease, Infectious Disease, Inflammatory Disease, Inflammatory Response, Metabolic Disease, Neurological Disease, Nutritional Disease, Organismal Injury and Abnormalities,…
INHA	inhibin, alpha	Extracellular Space	growth factor		P05111	x	efficacy	Cancer, Cardiovascular Disease, Connective Tissue Disorders, Developmental Disorder, Endocrine System Disorders, Gastrointestinal Disease, Hematological Disease, Hepatic System Disease, Immunological Disease, Inflammatory Disease, Inflammatory Response, Neurological Disease, Nutritional Disease, Organismal Injury and Abnormalities, Reproductive System Disease, Skeletal and Muscular Disorders
INSR	insulin receptor	Plasma Membrane	kinase	insulin detemir, INS, insulin aspart/insulin detemir, insulin glargine/insulin lispro, insulin aspart, insulin glulisine, insulin lispro, insulin glargine, protamine zinc insulin	P06213	x	prognosis	Cancer, Cardiovascular Disease, Connective Tissue Disorders, Dermatological Diseases and Conditions, Developmental Disorder, Endocrine System Disorders, Gastrointestinal Disease, Hematological Disease, Hepatic System Disease, Hereditary Disorder, Immunological Disease, Infectious Disease, Inflammatory Disease, Inflammatory Response, Metabolic Disease, Neurological Disease, Nutritional Disease, Or…
IRS1	insulin receptor substrate 1	Cytoplasm	enzyme		P35568	x	efficacy	Cancer, Cardiovascular Disease, Connective Tissue Disorders, Developmental Disorder, Endocrine System Disorders, Gastrointestinal Disease, Hematological Disease, Hepatic System Disease, Metabolic Disease, Nutritional Disease, Organismal Injury and Abnormalities
ITGA5	integrin, alpha 5 (fibronectin receptor, alpha polypeptide)	Plasma Membrane	transmembrane receptor		P08648	x	prognosis	Cancer, Cardiovascular Disease, Connective Tissue Disorders, Dermatological Diseases and Conditions, Developmental Disorder, Endocrine System Disorders, Gastrointestinal Disease, Hematological Disease, Hepatic System Disease, Hypersensitivity Response, Immunological Disease, Infectious Disease, Inflammatory Disease, Inflammatory Response, Organismal Injury and Abnormalities, Respiratory Disease, …
ITGB1	integrin, beta 1 (fibronectin receptor, beta polypeptide, antigen CD29 includes MDF2, MSK12)	Plasma Membrane	transmembrane receptor		P05556	x	disease progression,prognosis	Cancer, Cardiovascular Disease, Connective Tissue Disorders, Dermatological Diseases and Conditions, Developmental Disorder, Gastrointestinal Disease, Hematological Disease, Hereditary Disorder, Hypersensitivity Response, Immunological Disease, Infectious Disease, Inflammatory Response, Neurological Disease, Nutritional Disease, Organismal Injury and Abnormalities, Renal and Urological Disease, R…
ITGB4	integrin, beta 4	Plasma Membrane	transmembrane receptor		P16144	x	diagnosis	Cancer, Connective Tissue Disorders, Dermatological Diseases and Conditions, Developmental Disorder, Endocrine System Disorders, Gastrointestinal Disease, Hereditary Disorder, Neurological Disease, Organismal Injury and Abnormalities, Psychological Disorders, Renal and Urological Disease, Reproductive System Disease, Respiratory Disease, Skeletal and Muscular Disorders
ITGB5	integrin, beta 5	Plasma Membrane	other	cilengitide	P18084	x	diagnosis	Cancer, Inflammatory Response, Neurological Disease, Organismal Injury and Abnormalities, Psychological Disorders, Renal and Urological Disease, Reproductive System Disease, Respiratory Disease
ITGB6	integrin, beta 6	Plasma Membrane	other		P18564	x	diagnosis	Cancer, Dermatological Diseases and Conditions, Gastrointestinal Disease, Hematological Disease, Immunological Disease, Inflammatory Disease, Inflammatory Response, Metabolic Disease, Organismal Injury and Abnormalities, Renal and Urological Disease, Reproductive System Disease, Respiratory Disease
JAG1	jagged 1	Extracellular Space	growth factor		P78504	x	efficacy	Auditory Disease, Cancer, Cardiovascular Disease, Developmental Disorder, Gastrointestinal Disease, Hepatic System Disease, Hereditary Disorder, Immunological Disease, Inflammatory Disease, Inflammatory Response, Neurological Disease, Ophthalmic Disease, Organismal Injury and Abnormalities, Reproductive System Disease
JAK1	Janus kinase 1	Cytoplasm	kinase	ruxolitinib	P23458	x	efficacy	Antimicrobial Response, Cancer, Gastrointestinal Disease, Hematological Disease, Hepatic System Disease, Immunological Disease, Infectious Disease, Inflammatory Response, Organismal Injury and Abnormalities, Reproductive System Disease
JAK2	Janus kinase 2	Cytoplasm	kinase	ruxolitinib	O60674	x	efficacy,prognosis	Cancer, Cardiovascular Disease, Developmental Disorder, Endocrine System Disorders, Gastrointestinal Disease, Hematological Disease, Hepatic System Disease, Hereditary Disorder, Immunological Disease, Infectious Disease, Inflammatory Disease, Inflammatory Response, Metabolic Disease, Nutritional Disease, Organismal Injury and Abnormalities, Reproductive System Disease, Respiratory Disease, Skelet…
JUP	junction plakoglobin	Plasma Membrane	other		P14923	x	diagnosis,unspecified application	Cancer, Cardiovascular Disease, Dermatological Diseases and Conditions, Developmental Disorder, Gastrointestinal Disease, Hematological Disease, Immunological Disease, Inflammatory Disease, Inflammatory Response, Organismal Injury and Abnormalities, Renal and Urological Disease, Reproductive System Disease
KCNMA1	potassium large conductance calcium-activated channel, subfamily M, alpha member 1	Plasma Membrane	ion channel	tedisamil, cromolyn, enflurane	Q12791	x	diagnosis	Auditory Disease, Cancer, Cardiovascular Disease, Gastrointestinal Disease, Hematological Disease, Hereditary Disorder, Immunological Disease, Inflammatory Disease, Inflammatory Response, Neurological Disease, Ophthalmic Disease, Organismal Injury and Abnormalities, Renal and Urological Disease, Reproductive System Disease, Respiratory Disease, Skeletal and Muscular Disorders
KDELR1	KDEL (Lys-Asp-Glu-Leu) endoplasmic reticulum protein retention receptor 1	Cytoplasm	transporter		P24390	x	unspecified application	Cancer, Respiratory Disease
KDR	kinase insert domain receptor (a type III receptor tyrosine kinase)	Plasma Membrane	kinase	AEE 788, sunitinib, cediranib, pazopanib, axitinib, XL647, CEP 7055, brivanib alaninate, CHIR-265, tivozanib, motesanib, OSI-930, telatinib, ramucirumab, cabozantinib, regorafenib, bortezomib/sorafenib, lapatinib/pazopanib, dexamethasone/lenalidomide/sorafenib, bevacizumab/sorafenib, vatalanib, sorafenib, vandetanib, pegaptanib	P35968	x	disease progression,efficacy,prognosis,response to therapy,safety	Cancer, Cardiovascular Disease, Connective Tissue Disorders, Dermatological Diseases and Conditions, Developmental Disorder, Endocrine System Disorders, Gastrointestinal Disease, Hematological Disease, Hepatic System Disease, Hereditary Disorder, Inflammatory Disease, Inflammatory Response, Metabolic Disease, Neurological Disease, Ophthalmic Disease, Organismal Injury and Abnormalities, Renal and…
KHSRP	KH-type splicing regulatory protein	Nucleus	enzyme		Q92945	x	unspecified application	Cancer, Connective Tissue Disorders, Immunological Disease, Infectious Disease, Inflammatory Disease, Neurological Disease, Organismal Injury and Abnormalities, Renal and Urological Disease, Reproductive System Disease, Skeletal and Muscular Disorders
KIF14	kinesin family member 14	Cytoplasm	other		Q15058	x	diagnosis	Cancer, Gastrointestinal Disease, Organismal Injury and Abnormalities, Reproductive System Disease
KIF1A	kinesin family member 1A	Cytoplasm	other		Q12756	x	diagnosis,prognosis	Cancer, Developmental Disorder, Gastrointestinal Disease, Hereditary Disorder, Neurological Disease
KIT	v-kit Hardy-Zuckerman 4 feline sarcoma viral oncogene homolog	Plasma Membrane	transmembrane receptor	dasatinib, sunitinib, pazopanib, tivozanib, motesanib, OSI-930, telatinib, tandutinib, cabozantinib, regorafenib, ponatinib, bortezomib/sorafenib, lapatinib/pazopanib, dexamethasone/lenalidomide/sorafenib, bevacizumab/sorafenib, imatinib/sirolimus, imatinib, sorafenib	P10721	x	diagnosis,efficacy,prognosis,safety,unspecified application	Cancer, Cardiovascular Disease, Connective Tissue Disorders, Dermatological Diseases and Conditions, Developmental Disorder, Endocrine System Disorders, Gastrointestinal Disease, Hematological Disease, Hepatic System Disease, Hereditary Disorder, Hypersensitivity Response, Immunological Disease, Infectious Disease, Inflammatory Disease, Inflammatory Response, Metabolic Disease, Neurological Disea…
KPNA2	karyopherin alpha 2 (RAG cohort 1, importin alpha 1)	Nucleus	transporter		P52292	x	diagnosis	Cancer, Dermatological Diseases and Conditions, Endocrine System Disorders, Gastrointestinal Disease, Hematological Disease, Immunological Disease, Neurological Disease, Organismal Injury and Abnormalities, Reproductive System Disease
KRAS	Kirsten rat sarcoma viral oncogene homolog	Cytoplasm	enzyme		P01116	x	diagnosis,efficacy,prognosis,response to therapy,unspecified application	Cancer, Cardiovascular Disease, Connective Tissue Disorders, Dermatological Diseases and Conditions, Developmental Disorder, Endocrine System Disorders, Gastrointestinal Disease, Hematological Disease, Hepatic System Disease, Hereditary Disorder, Immunological Disease, Inflammatory Disease, Inflammatory Response, Neurological Disease, Organismal Injury and Abnormalities, Psychological Disorders, …
KRT1	keratin 1	Cytoplasm	other		P04264	x	diagnosis	Cancer, Dermatological Diseases and Conditions, Developmental Disorder, Gastrointestinal Disease, Hematological Disease, Hereditary Disorder, Immunological Disease, Inflammatory Disease, Inflammatory Response, Nutritional Disease, Organismal Injury and Abnormalities, Reproductive System Disease
KRT5	keratin 5	Cytoplasm	other		P13647	x	diagnosis,efficacy,unspecified application	Cancer, Connective Tissue Disorders, Dermatological Diseases and Conditions, Developmental Disorder, Hereditary Disorder, Immunological Disease, Inflammatory Disease, Inflammatory Response, Organismal Injury and Abnormalities, Reproductive System Disease, Respiratory Disease
KRT8	keratin 8	Cytoplasm	other		P05787	x	prognosis	Cancer, Dermatological Diseases and Conditions, Developmental Disorder, Endocrine System Disorders, Gastrointestinal Disease, Hematological Disease, Hepatic System Disease, Hereditary Disorder, Infectious Disease, Inflammatory Disease, Inflammatory Response, Metabolic Disease, Organismal Injury and Abnormalities, Reproductive System Disease, Respiratory Disease, Skeletal and Muscular Disorders
KRT14	keratin 14	Cytoplasm	other		P02533	x	unspecified application	Cancer, Connective Tissue Disorders, Dermatological Diseases and Conditions, Developmental Disorder, Gastrointestinal Disease, Hereditary Disorder, Infectious Disease, Inflammatory Disease, Inflammatory Response, Neurological Disease, Organismal Injury and Abnormalities, Reproductive System Disease, Respiratory Disease
KRT17	keratin 17	Cytoplasm	other		Q04695	x	diagnosis,efficacy	Cancer, Dermatological Diseases and Conditions, Developmental Disorder, Hereditary Disorder, Immunological Disease, Inflammatory Disease, Inflammatory Response, Neurological Disease, Organismal Injury and Abnormalities, Psychological Disorders, Reproductive System Disease, Skeletal and Muscular Disorders
KRT18	keratin 18	Cytoplasm	other		P05783	x	efficacy	Cancer, Dermatological Diseases and Conditions, Gastrointestinal Disease, Hepatic System Disease, Infectious Disease, Inflammatory Disease, Inflammatory Response, Organismal Injury and Abnormalities, Renal and Urological Disease, Reproductive System Disease
KRT6A	keratin 6A	Plasma Membrane	other		P02538	x	diagnosis	Cancer, Cardiovascular Disease, Dermatological Diseases and Conditions, Developmental Disorder, Hematological Disease, Hereditary Disorder, Immunological Disease, Inflammatory Disease, Inflammatory Response, Neurological Disease, Organismal Injury and Abnormalities, Reproductive System Disease, Skeletal and Muscular Disorders
LAMA3	laminin, alpha 3	Extracellular Space	other		Q16787	x	diagnosis	Cancer, Connective Tissue Disorders, Dermatological Diseases and Conditions, Developmental Disorder, Gastrointestinal Disease, Hematological Disease, Hereditary Disorder, Immunological Disease, Organismal Injury and Abnormalities, Reproductive System Disease, Respiratory Disease
LAP3	leucine aminopeptidase 3	Cytoplasm	peptidase		P28838	x	safety	Cancer, Connective Tissue Disorders, Dermatological Diseases and Conditions, Immunological Disease, Inflammatory Disease, Organismal Injury and Abnormalities, Reproductive System Disease, Skeletal and Muscular Disorders
LCAT	lecithin-cholesterol acyltransferase	Extracellular Space	enzyme		P04180	x	efficacy	Cancer, Cardiovascular Disease, Connective Tissue Disorders, Developmental Disorder, Gastrointestinal Disease, Hematological Disease, Hereditary Disorder, Inflammatory Disease, Inflammatory Response, Metabolic Disease, Organismal Injury and Abnormalities, Renal and Urological Disease, Reproductive System Disease
LCK	lymphocyte-specific protein tyrosine kinase	Cytoplasm	kinase	dasatinib, pazopanib	P06239	x	diagnosis	Cancer, Cardiovascular Disease, Developmental Disorder, Endocrine System Disorders, Gastrointestinal Disease, Hematological Disease, Immunological Disease, Infectious Disease, Inflammatory Response, Metabolic Disease, Ophthalmic Disease, Organismal Injury and Abnormalities, Renal and Urological Disease, Reproductive System Disease, Respiratory Disease
LCP1	lymphocyte cytosolic protein 1 (L-plastin)	Cytoplasm	other		P13796	x	disease progression	Cancer, Cardiovascular Disease, Connective Tissue Disorders, Dermatological Diseases and Conditions, Endocrine System Disorders, Gastrointestinal Disease, Immunological Disease, Infectious Disease, Inflammatory Disease, Inflammatory Response, Metabolic Disease, Organismal Injury and Abnormalities, Renal and Urological Disease, Skeletal and Muscular Disorders
LDHC	lactate dehydrogenase C	Cytoplasm	enzyme		P07864	x	diagnosis	Cancer, Gastrointestinal Disease, Hepatic System Disease, Organismal Injury and Abnormalities, Reproductive System Disease
LDLR	low density lipoprotein receptor	Plasma Membrane	transporter		P01130	x	disease progression,unspecified application	Antimicrobial Response, Cancer, Cardiovascular Disease, Dermatological Diseases and Conditions, Developmental Disorder, Endocrine System Disorders, Gastrointestinal Disease, Hematological Disease, Hepatic System Disease, Hereditary Disorder, Immunological Disease, Infectious Disease, Inflammatory Disease, Inflammatory Response, Metabolic Disease, Neurological Disease, Nutritional Disease, Ophthal…
LGALS1	lectin, galactoside-binding, soluble, 1	Extracellular Space	other		P09382	x	diagnosis,prognosis	Cancer, Cardiovascular Disease, Connective Tissue Disorders, Dermatological Diseases and Conditions, Developmental Disorder, Endocrine System Disorders, Gastrointestinal Disease, Hematological Disease, Hereditary Disorder, Immunological Disease, Infectious Disease, Inflammatory Disease, Inflammatory Response, Metabolic Disease, Neurological Disease, Ophthalmic Disease, Organismal Injury and Abnor…
LIFR	leukemia inhibitory factor receptor alpha	Plasma Membrane	transmembrane receptor		P42702	x	diagnosis	Cancer, Endocrine System Disorders, Gastrointestinal Disease, Hereditary Disorder, Infectious Disease, Neurological Disease, Organismal Injury and Abnormalities, Psychological Disorders, Reproductive System Disease, Skeletal and Muscular Disorders
LRIG2	leucine-rich repeats and immunoglobulin-like domains 2	Cytoplasm	other		O94898	x	prognosis	Cancer, Dermatological Diseases and Conditions, Developmental Disorder, Neurological Disease, Organismal Injury and Abnormalities, Renal and Urological Disease
LRRK2	leucine-rich repeat kinase 2	Cytoplasm	kinase		Q5S007	x	diagnosis	Cancer, Connective Tissue Disorders, Dermatological Diseases and Conditions, Developmental Disorder, Gastrointestinal Disease, Hematological Disease, Hereditary Disorder, Immunological Disease, Inflammatory Disease, Inflammatory Response, Metabolic Disease, Neurological Disease, Organismal Injury and Abnormalities, Psychological Disorders, Renal and Urological Disease, Reproductive System Disease…
LTK	leukocyte receptor tyrosine kinase	Plasma Membrane	kinase	pazopanib	P29376	x	disease progression	Cancer, Cardiovascular Disease, Developmental Disorder, Endocrine System Disorders, Neurological Disease, Organismal Injury and Abnormalities, Renal and Urological Disease, Reproductive System Disease, Respiratory Disease
MAGEA4	melanoma antigen family A, 4	Cytoplasm	other		P43358	x	unspecified application	Cancer, Gastrointestinal Disease, Organismal Injury and Abnormalities, Reproductive System Disease
MAP4	microtubule-associated protein 4	Cytoplasm	other		P27816	x	efficacy	Cancer, Infectious Disease, Organismal Injury and Abnormalities, Renal and Urological Disease, Reproductive System Disease, Respiratory Disease
MAP2K6	mitogen-activated protein kinase kinase 6	Cytoplasm	kinase		P52564	x	prognosis	Cancer, Cardiovascular Disease, Developmental Disorder, Gastrointestinal Disease, Hepatic System Disease, Hereditary Disorder, Organismal Injury and Abnormalities, Renal and Urological Disease, Reproductive System Disease, Skeletal and Muscular Disorders
MAPK1	mitogen-activated protein kinase 1	Cytoplasm	kinase	ARRY-438162	P28482	x	efficacy	Cancer, Cardiovascular Disease, Dermatological Diseases and Conditions, Developmental Disorder, Hypersensitivity Response, Infectious Disease, Inflammatory Response, Neurological Disease, Organismal Injury and Abnormalities, Renal and Urological Disease, Skeletal and Muscular Disorders
MAPK3	mitogen-activated protein kinase 3	Cytoplasm	kinase		P27361	x	efficacy	Cancer, Cardiovascular Disease, Connective Tissue Disorders, Developmental Disorder, Hypersensitivity Response, Immunological Disease, Inflammatory Disease, Inflammatory Response, Metabolic Disease, Neurological Disease, Nutritional Disease, Organismal Injury and Abnormalities, Psychological Disorders, Respiratory Disease, Skeletal and Muscular Disorders
MAPKAPK3	mitogen-activated protein kinase-activated protein kinase 3	Nucleus	kinase		Q16644	x	unspecified application	Dermatological Diseases and Conditions, Hereditary Disorder, Immunological Disease, Inflammatory Disease, Inflammatory Response, Neurological Disease, Organismal Injury and Abnormalities, Psychological Disorders, Renal and Urological Disease, Skeletal and Muscular Disorders
MARK3	MAP/microtubule affinity-regulating kinase 3	Cytoplasm	kinase		P27448	x	prognosis	Cancer, Endocrine System Disorders, Gastrointestinal Disease, Hematological Disease, Hepatic System Disease, Metabolic Disease, Nutritional Disease, Organismal Injury and Abnormalities, Reproductive System Disease
MBP	myelin basic protein	Extracellular Space	other		P02686	x	diagnosis,unspecified application	Cancer, Dermatological Diseases and Conditions, Gastrointestinal Disease, Hereditary Disorder, Immunological Disease, Inflammatory Disease, Inflammatory Response, Neurological Disease, Organismal Injury and Abnormalities, Psychological Disorders, Renal and Urological Disease, Reproductive System Disease, Skeletal and Muscular Disorders
MC1R	melanocortin 1 receptor (alpha melanocyte stimulating hormone receptor)	Plasma Membrane	G-protein coupled receptor		Q01726	x	diagnosis	Cancer, Dermatological Diseases and Conditions, Developmental Disorder, Hereditary Disorder, Inflammatory Disease, Metabolic Disease, Neurological Disease, Ophthalmic Disease, Organismal Injury and Abnormalities, Psychological Disorders, Skeletal and Muscular Disorders
MCAM	melanoma cell adhesion molecule	Plasma Membrane	other		P43121	x	diagnosis,prognosis	Cancer, Dermatological Diseases and Conditions, Endocrine System Disorders, Gastrointestinal Disease, Hematological Disease, Immunological Disease, Infectious Disease, Inflammatory Disease, Inflammatory Response, Neurological Disease, Organismal Injury and Abnormalities, Reproductive System Disease, Skeletal and Muscular Disorders
MCM2	minichromosome maintenance complex component 2	Nucleus	enzyme		P49736	x	diagnosis,disease progression,efficacy,unspecified application	Cancer, Organismal Injury and Abnormalities, Renal and Urological Disease, Reproductive System Disease, Respiratory Disease
MCM4	minichromosome maintenance complex component 4	Nucleus	enzyme		P33991	x	disease progression	Cancer, Endocrine System Disorders, Gastrointestinal Disease, Hematological Disease, Hereditary Disorder, Immunological Disease, Organismal Injury and Abnormalities, Reproductive System Disease
MCM5	minichromosome maintenance complex component 5	Nucleus	enzyme		P33992	x	disease progression	Cancer, Connective Tissue Disorders, Dermatological Diseases and Conditions, Gastrointestinal Disease, Inflammatory Disease, Organismal Injury and Abnormalities, Reproductive System Disease, Skeletal and Muscular Disorders
MCM7	minichromosome maintenance complex component 7	Nucleus	enzyme		P33993	x	diagnosis,disease progression	Cancer, Endocrine System Disorders, Organismal Injury and Abnormalities, Reproductive System Disease
MDM2	MDM2 oncogene, E3 ubiquitin protein ligase	Nucleus	transcription regulator		Q00987	x	disease progression,efficacy	Cancer, Cardiovascular Disease, Connective Tissue Disorders, Dermatological Diseases and Conditions, Developmental Disorder, Gastrointestinal Disease, Hematological Disease, Hepatic System Disease, Immunological Disease, Infectious Disease, Inflammatory Disease, Inflammatory Response, Neurological Disease, Organismal Injury and Abnormalities, Renal and Urological Disease, Reproductive System Dise…
MECOM	MDS1 and EVI1 complex locus	Nucleus	transcription regulator		Q03112	x	prognosis	Antimicrobial Response, Cancer, Cardiovascular Disease, Dermatological Diseases and Conditions, Developmental Disorder, Endocrine System Disorders, Hematological Disease, Infectious Disease, Inflammatory Response, Organismal Injury and Abnormalities, Reproductive System Disease
MECP2	methyl CpG binding protein 2 (Rett syndrome)	Nucleus	transcription regulator		P51608	x	unspecified application	Auditory Disease, Connective Tissue Disorders, Dental Disease, Dermatological Diseases and Conditions, Developmental Disorder, Endocrine System Disorders, Gastrointestinal Disease, Hereditary Disorder, Neurological Disease, Nutritional Disease, Organismal Injury and Abnormalities, Psychological Disorders, Reproductive System Disease, Respiratory Disease, Skeletal and Muscular Disorders
MEF2C	myocyte enhancer factor 2C	Nucleus	transcription regulator		Q06413	x	unspecified application	Cancer, Cardiovascular Disease, Developmental Disorder, Inflammatory Response, Neurological Disease, Organismal Injury and Abnormalities, Psychological Disorders, Reproductive System Disease
MET	met proto-oncogene	Plasma Membrane	kinase	crizotinib, tivantinib, cabozantinib, INC280	P08581	x	diagnosis,disease progression,efficacy,prognosis,response to therapy,unspecified application	Cancer, Cardiovascular Disease, Developmental Disorder, Endocrine System Disorders, Gastrointestinal Disease, Hepatic System Disease, Hypersensitivity Response, Inflammatory Response, Metabolic Disease, Neurological Disease, Nutritional Disease, Organismal Injury and Abnormalities, Renal and Urological Disease, Reproductive System Disease, Respiratory Disease, Skeletal and Muscular Disorders
MIB1	mindbomb E3 ubiquitin protein ligase 1	Cytoplasm	other		Q86YT6	x	diagnosis,efficacy	Cancer, Cardiovascular Disease, Connective Tissue Disorders, Developmental Disorder, Gastrointestinal Disease, Hematological Disease, Immunological Disease, Inflammatory Disease, Inflammatory Response, Neurological Disease, Organismal Injury and Abnormalities, Reproductive System Disease
MICALL1	MICAL-like 1	Cytoplasm	other		Q8N3F8	x	unspecified application	Cancer, Hereditary Disorder, Infectious Disease, Neurological Disease, Psychological Disorders, Skeletal and Muscular Disorders
MITF	microphthalmia-associated transcription factor	Nucleus	transcription regulator		O75030	x	unspecified application	Auditory Disease, Cancer, Connective Tissue Disorders, Dermatological Diseases and Conditions, Developmental Disorder, Gastrointestinal Disease, Hematological Disease, Hereditary Disorder, Hypersensitivity Response, Immunological Disease, Inflammatory Response, Metabolic Disease, Neurological Disease, Ophthalmic Disease, Organismal Injury and Abnormalities, Renal and Urological Disease, Skeletal …
MKI67	marker of proliferation Ki-67	Nucleus	other		P46013	x	diagnosis,disease progression,efficacy,prognosis,response to therapy,unspecified application	Cancer, Cardiovascular Disease, Dermatological Diseases and Conditions, Endocrine System Disorders, Gastrointestinal Disease, Hematological Disease, Immunological Disease, Inflammatory Disease, Inflammatory Response, Neurological Disease, Ophthalmic Disease, Organismal Injury and Abnormalities, Renal and Urological Disease, Reproductive System Disease
MLH1	mutL homolog 1	Nucleus	enzyme		P40692	x	diagnosis,efficacy,prognosis	Cancer, Dermatological Diseases and Conditions, Developmental Disorder, Endocrine System Disorders, Gastrointestinal Disease, Hematological Disease, Hereditary Disorder, Immunological Disease, Infectious Disease, Neurological Disease, Organismal Injury and Abnormalities, Reproductive System Disease, Respiratory Disease
MLH3	mutL homolog 3	Nucleus	other		Q9UHC1	x	diagnosis	Cancer, Endocrine System Disorders, Gastrointestinal Disease, Hereditary Disorder, Neurological Disease, Organismal Injury and Abnormalities, Reproductive System Disease
MMP1	matrix metallopeptidase 1 (interstitial collagenase)	Extracellular Space	peptidase	marimastat	P03956	x	diagnosis,efficacy,safety	Cancer, Cardiovascular Disease, Connective Tissue Disorders, Dermatological Diseases and Conditions, Developmental Disorder, Endocrine System Disorders, Gastrointestinal Disease, Hepatic System Disease, Hereditary Disorder, Immunological Disease, Inflammatory Disease, Inflammatory Response, Metabolic Disease, Neurological Disease, Organismal Injury and Abnormalities, Psychological Disorders, Repr…
MMP3	matrix metallopeptidase 3 (stromelysin 1, progelatinase)	Extracellular Space	peptidase	marimastat	P08254	x	diagnosis,efficacy	Auditory Disease, Cancer, Cardiovascular Disease, Connective Tissue Disorders, Dermatological Diseases and Conditions, Developmental Disorder, Endocrine System Disorders, Gastrointestinal Disease, Immunological Disease, Infectious Disease, Inflammatory Disease, Inflammatory Response, Organismal Injury and Abnormalities, Renal and Urological Disease, Reproductive System Disease, Respiratory Diseas…
MPDZ	multiple PDZ domain protein	Plasma Membrane	other		O75970	x	unspecified application	Cancer, Developmental Disorder, Hematological Disease, Hereditary Disorder, Immunological Disease, Infectious Disease, Neurological Disease, Organismal Injury and Abnormalities, Psychological Disorders, Renal and Urological Disease, Reproductive System Disease, Skeletal and Muscular Disorders
MS4A1	membrane-spanning 4-domains, subfamily A, member 1	Plasma Membrane	other	tositumomab, rituximab, ofatumumab, veltuzumab, methotrexate/ofatumumab, ocrelizumab, SBI-087, bortezomib/cladribine/rituximab, PF-5212374, obinutuzumab, cyclophosphamide/fludarabine phosphate/rituximab, methotrexate/rituximab, rituximab/temozolomide, methotrexate/rituximab/temozolomide, cyclophosphamide/dexamethasone/rituximab, fludarabine phosphate/rituximab, rituximab/thalidomide, cyclophospha…	P11836	x	efficacy,prognosis	Cancer, Cardiovascular Disease, Connective Tissue Disorders, Dermatological Diseases and Conditions, Endocrine System Disorders, Gastrointestinal Disease, Hematological Disease, Hereditary Disorder, Immunological Disease, Inflammatory Disease, Inflammatory Response, Metabolic Disease, Neurological Disease, Ophthalmic Disease, Organismal Injury and Abnormalities, Renal and Urological Disease, Resp…
MSH2	mutS homolog 2	Nucleus	enzyme		P43246	x	diagnosis,prognosis	Cancer, Connective Tissue Disorders, Dermatological Diseases and Conditions, Developmental Disorder, Endocrine System Disorders, Gastrointestinal Disease, Hematological Disease, Hereditary Disorder, Immunological Disease, Infectious Disease, Inflammatory Response, Neurological Disease, Organismal Injury and Abnormalities, Psychological Disorders, Reproductive System Disease, Respiratory Disease, …
MSH3	mutS homolog 3	Nucleus	enzyme		P20585	x	diagnosis	Cancer, Dermatological Diseases and Conditions, Gastrointestinal Disease, Hematological Disease, Immunological Disease, Neurological Disease, Organismal Injury and Abnormalities, Psychological Disorders, Reproductive System Disease
MSH6	mutS homolog 6	Nucleus	enzyme		P52701	x	diagnosis	Cancer, Dermatological Diseases and Conditions, Endocrine System Disorders, Gastrointestinal Disease, Hematological Disease, Hereditary Disorder, Immunological Disease, Organismal Injury and Abnormalities, Reproductive System Disease, Respiratory Disease
MSLN	mesothelin	Extracellular Space	other	amatuximab	Q13421	x	diagnosis,prognosis,unspecified application	Cancer, Endocrine System Disorders, Gastrointestinal Disease, Organismal Injury and Abnormalities, Reproductive System Disease
MTA1	metastasis associated 1	Nucleus	transcription regulator		Q13330	x	diagnosis,response to therapy	Cancer, Hematological Disease, Immunological Disease, Organismal Injury and Abnormalities, Reproductive System Disease
MTDH	metadherin	Cytoplasm	transcription regulator		Q86UE4	x	prognosis	Cancer, Hereditary Disorder, Neurological Disease, Organismal Injury and Abnormalities, Psychological Disorders, Reproductive System Disease, Skeletal and Muscular Disorders
MTOR	mechanistic target of rapamycin (serine/threonine kinase)	Nucleus	kinase	ridaforolimus, OSI-027, methotrexate/sirolimus/tacrolimus, dactolisib, everolimus/exemestane, lenalidomide/temsirolimus, imatinib/sirolimus, cyclophosphamide/sirolimus, cyclosporine A/sirolimus/tacrolimus, sirolimus, temsirolimus, tacrolimus, everolimus, pimecrolimus	P42345	x	efficacy	Cancer, Cardiovascular Disease, Connective Tissue Disorders, Dermatological Diseases and Conditions, Developmental Disorder, Endocrine System Disorders, Gastrointestinal Disease, Hematological Disease, Hepatic System Disease, Hereditary Disorder, Immunological Disease, Infectious Disease, Inflammatory Disease, Inflammatory Response, Metabolic Disease, Neurological Disease, Ophthalmic Disease, Org…
MUC1	mucin 1, cell surface associated	Plasma Membrane	transcription regulator	HuHMFG1	P15941	x	diagnosis,disease progression,efficacy,prognosis,unspecified application	Cancer, Dermatological Diseases and Conditions, Developmental Disorder, Endocrine System Disorders, Gastrointestinal Disease, Hematological Disease, Hepatic System Disease, Hereditary Disorder, Immunological Disease, Inflammatory Disease, Inflammatory Response, Neurological Disease, Organismal Injury and Abnormalities, Psychological Disorders, Renal and Urological Disease, Reproductive System Dis…
MUC16	mucin 16, cell surface associated	Other	other		Q8WXI7	x	diagnosis,disease progression,efficacy,prognosis,unspecified application	Cancer, Endocrine System Disorders, Gastrointestinal Disease, Hematological Disease, Immunological Disease, Neurological Disease, Organismal Injury and Abnormalities, Renal and Urological Disease, Reproductive System Disease, Respiratory Disease
MYBBP1A	MYB binding protein (P160) 1a	Nucleus	transcription regulator		Q9BQG0	x	unspecified application	Cancer, Organismal Injury and Abnormalities, Reproductive System Disease
MYC	v-myc avian myelocytomatosis viral oncogene homolog	Nucleus	transcription regulator		P01106	x	diagnosis,efficacy,prognosis,response to therapy,unspecified application	Cancer, Cardiovascular Disease, Connective Tissue Disorders, Dermatological Diseases and Conditions, Developmental Disorder, Endocrine System Disorders, Gastrointestinal Disease, Hematological Disease, Hepatic System Disease, Hereditary Disorder, Immunological Disease, Infectious Disease, Inflammatory Disease, Inflammatory Response, Metabolic Disease, Neurological Disease, Nutritional Disease, Or…
MYCN	v-myc avian myelocytomatosis viral oncogene neuroblastoma derived homolog	Nucleus	transcription regulator		P04198	x	diagnosis,prognosis	Cancer, Cardiovascular Disease, Connective Tissue Disorders, Developmental Disorder, Gastrointestinal Disease, Hematological Disease, Hepatic System Disease, Hereditary Disorder, Immunological Disease, Inflammatory Response, Neurological Disease, Organismal Injury and Abnormalities, Reproductive System Disease, Respiratory Disease, Skeletal and Muscular Disorders
MYH7	myosin, heavy chain 7, cardiac muscle, beta	Cytoplasm	enzyme		P12883	x	unspecified application	Cancer, Cardiovascular Disease, Developmental Disorder, Hereditary Disorder, Neurological Disease, Organismal Injury and Abnormalities, Psychological Disorders, Reproductive System Disease, Skeletal and Muscular Disorders
MYH9	myosin, heavy chain 9, non-muscle	Cytoplasm	transporter		P35579	x	unspecified application	Auditory Disease, Cancer, Cardiovascular Disease, Connective Tissue Disorders, Developmental Disorder, Gastrointestinal Disease, Hematological Disease, Hereditary Disorder, Immunological Disease, Inflammatory Disease, Inflammatory Response, Neurological Disease, Organismal Injury and Abnormalities, Psychological Disorders, Renal and Urological Disease, Reproductive System Disease, Respiratory Dis…
MYH10	myosin, heavy chain 10, non-muscle	Cytoplasm	other		P35580	x	unspecified application	Cancer, Cardiovascular Disease, Connective Tissue Disorders, Developmental Disorder, Hematological Disease, Hereditary Disorder, Immunological Disease, Inflammatory Disease, Inflammatory Response, Neurological Disease, Organismal Injury and Abnormalities, Renal and Urological Disease, Reproductive System Disease
MYL12A	myosin, light chain 12A, regulatory, non-sarcomeric	Cytoplasm	other		P19105	x	unspecified application	Cancer, Connective Tissue Disorders, Hereditary Disorder, Immunological Disease, Inflammatory Disease, Neurological Disease, Psychological Disorders, Respiratory Disease, Skeletal and Muscular Disorders
MYLK	myosin light chain kinase	Cytoplasm	kinase		Q15746	x	prognosis	Cancer, Cardiovascular Disease, Connective Tissue Disorders, Developmental Disorder, Gastrointestinal Disease, Hereditary Disorder, Immunological Disease, Inflammatory Disease, Inflammatory Response, Neurological Disease, Organismal Injury and Abnormalities, Reproductive System Disease, Respiratory Disease, Skeletal and Muscular Disorders
NAP1L4	nucleosome assembly protein 1-like 4	Other	other		Q99733	x	unspecified application	Cancer, Organismal Injury and Abnormalities, Reproductive System Disease
NBN	nibrin	Nucleus	other		O60934	x	diagnosis,efficacy	Cancer, Connective Tissue Disorders, Developmental Disorder, Endocrine System Disorders, Gastrointestinal Disease, Hematological Disease, Hepatic System Disease, Hereditary Disorder, Immunological Disease, Inflammatory Disease, Inflammatory Response, Neurological Disease, Organismal Injury and Abnormalities, Reproductive System Disease, Respiratory Disease, Skeletal and Muscular Disorders
NCF1	neutrophil cytosolic factor 1	Cytoplasm	enzyme		P14598	x	efficacy	Antimicrobial Response, Auditory Disease, Cancer, Cardiovascular Disease, Connective Tissue Disorders, Dermatological Diseases and Conditions, Developmental Disorder, Endocrine System Disorders, Gastrointestinal Disease, Hepatic System Disease, Hereditary Disorder, Immunological Disease, Infectious Disease, Inflammatory Disease, Inflammatory Response, Metabolic Disease, Neurological Disease, Nutr…
NCOA3	nuclear receptor coactivator 3	Nucleus	transcription regulator		Q9Y6Q9	x	efficacy,prognosis	Cancer, Connective Tissue Disorders, Endocrine System Disorders, Gastrointestinal Disease, Hematological Disease, Hepatic System Disease, Immunological Disease, Infectious Disease, Metabolic Disease, Nutritional Disease, Organismal Injury and Abnormalities, Reproductive System Disease
NME1	NME/NM23 nucleoside diphosphate kinase 1	Cytoplasm	kinase		P15531	x	unspecified application	Cancer, Gastrointestinal Disease, Hematological Disease, Hepatic System Disease, Hereditary Disorder, Immunological Disease, Neurological Disease, Organismal Injury and Abnormalities, Psychological Disorders, Reproductive System Disease, Skeletal and Muscular Disorders
NOS1	nitric oxide synthase 1 (neuronal)	Cytoplasm	enzyme	GW 273629, targinine	P29475	x	unspecified application	Cancer, Cardiovascular Disease, Developmental Disorder, Endocrine System Disorders, Gastrointestinal Disease, Hematological Disease, Hereditary Disorder, Immunological Disease, Inflammatory Response, Metabolic Disease, Neurological Disease, Nutritional Disease, Ophthalmic Disease, Organismal Injury and Abnormalities, Psychological Disorders, Renal and Urological Disease, Reproductive System Disea…
NOS3	nitric oxide synthase 3 (endothelial cell)	Cytoplasm	enzyme	5,6,7,8-tetrahydrobiopterin, GW 273629, targinine	P29474	x	disease progression,prognosis	Cancer, Cardiovascular Disease, Connective Tissue Disorders, Dermatological Diseases and Conditions, Developmental Disorder, Endocrine System Disorders, Gastrointestinal Disease, Hematological Disease, Hepatic System Disease, Hereditary Disorder, Immunological Disease, Infectious Disease, Inflammatory Disease, Inflammatory Response, Metabolic Disease, Neurological Disease, Nutritional Disease, Op…
NOTCH1	notch 1	Plasma Membrane	transcription regulator		P46531	x	diagnosis,efficacy	Cancer, Cardiovascular Disease, Connective Tissue Disorders, Dermatological Diseases and Conditions, Developmental Disorder, Endocrine System Disorders, Gastrointestinal Disease, Hematological Disease, Hepatic System Disease, Hereditary Disorder, Immunological Disease, Inflammatory Disease, Inflammatory Response, Metabolic Disease, Neurological Disease, Ophthalmic Disease, Organismal Injury and A…
NOTCH2	notch 2	Plasma Membrane	transcription regulator		Q04721	x	unspecified application	Cancer, Cardiovascular Disease, Connective Tissue Disorders, Dermatological Diseases and Conditions, Developmental Disorder, Endocrine System Disorders, Gastrointestinal Disease, Hematological Disease, Hepatic System Disease, Hereditary Disorder, Hypersensitivity Response, Immunological Disease, Inflammatory Disease, Inflammatory Response, Metabolic Disease, Neurological Disease, Ophthalmic Disea…
NPM1	nucleophosmin (nucleolar phosphoprotein B23, numatrin)	Nucleus	transcription regulator		P06748	x	disease progression,unspecified application	Cancer, Gastrointestinal Disease, Hematological Disease, Hepatic System Disease, Hereditary Disorder, Immunological Disease, Inflammatory Response, Neurological Disease, Organismal Injury and Abnormalities, Psychological Disorders, Renal and Urological Disease, Skeletal and Muscular Disorders
NQO1	NAD(P)H dehydrogenase, quinone 1	Cytoplasm	enzyme		P15559	x	diagnosis,unspecified application	Cancer, Connective Tissue Disorders, Dermatological Diseases and Conditions, Developmental Disorder, Endocrine System Disorders, Gastrointestinal Disease, Hematological Disease, Hepatic System Disease, Hereditary Disorder, Hypersensitivity Response, Immunological Disease, Inflammatory Disease, Inflammatory Response, Metabolic Disease, Neurological Disease, Organismal Injury and Abnormalities, Psy…
NRAS	neuroblastoma RAS viral (v-ras) oncogene homolog	Plasma Membrane	enzyme		P01111	x	efficacy,response to therapy	Cancer, Connective Tissue Disorders, Dermatological Diseases and Conditions, Developmental Disorder, Endocrine System Disorders, Gastrointestinal Disease, Hematological Disease, Hepatic System Disease, Hereditary Disorder, Immunological Disease, Inflammatory Response, Neurological Disease, Organismal Injury and Abnormalities, Renal and Urological Disease, Reproductive System Disease, Respiratory …
NTRK2	neurotrophic tyrosine kinase, receptor, type 2	Plasma Membrane	kinase	cabozantinib	Q16620	x	diagnosis,disease progression,response to therapy	Auditory Disease, Cancer, Connective Tissue Disorders, Developmental Disorder, Endocrine System Disorders, Gastrointestinal Disease, Hematological Disease, Hepatic System Disease, Hereditary Disorder, Immunological Disease, Infectious Disease, Inflammatory Disease, Metabolic Disease, Neurological Disease, Nutritional Disease, Organismal Injury and Abnormalities, Psychological Disorders, Renal and…
NUMA1	nuclear mitotic apparatus protein 1	Nucleus	other		Q14980	x	unspecified application	Cancer, Organismal Injury and Abnormalities, Renal and Urological Disease
NUMB	numb homolog (Drosophila)	Plasma Membrane	other		P49757	x	efficacy	Cancer, Cardiovascular Disease, Connective Tissue Disorders, Developmental Disorder, Immunological Disease, Inflammatory Disease, Organismal Injury and Abnormalities, Reproductive System Disease, Skeletal and Muscular Disorders
OPRM1	opioid receptor, mu 1	Plasma Membrane	G-protein coupled receptor	acetaminophen/pentazocine, acetaminophen/caffeine/dihydrocodeine, aspirin/hydrocodone, aspirin/oxycodone, dihydrocodeine, aspirin/caffeine/propoxyphene, aspirin/butalbital/caffeine/codeine, aspirin/caffeine/dihydrocodeine, dextromethorphan/morphine, alvimopan, diphenoxylate, dihydromorphine, ethylmorphine, tapentadol, morphine/naltrexone, buprenorphine/naloxone, acetaminophen/aspirin/codeine, hyd…	P35372	x	efficacy	Cancer, Cardiovascular Disease, Connective Tissue Disorders, Dermatological Diseases and Conditions, Developmental Disorder, Endocrine System Disorders, Gastrointestinal Disease, Hematological Disease, Hepatic System Disease, Hereditary Disorder, Immunological Disease, Infectious Disease, Inflammatory Disease, Inflammatory Response, Metabolic Disease, Neurological Disease, Nutritional Disease, Or…
OSMR	oncostatin M receptor	Plasma Membrane	transmembrane receptor		Q99650	x	diagnosis,efficacy,unspecified application	Cancer, Dermatological Diseases and Conditions, Developmental Disorder, Endocrine System Disorders, Gastrointestinal Disease, Hematological Disease, Hepatic System Disease, Hereditary Disorder, Immunological Disease, Inflammatory Disease, Inflammatory Response, Metabolic Disease, Nutritional Disease
PAH	phenylalanine hydroxylase	Cytoplasm	enzyme	5,6,7,8-tetrahydrobiopterin, sapropterin	P00439	x	efficacy	Cancer, Cardiovascular Disease, Dermatological Diseases and Conditions, Developmental Disorder, Gastrointestinal Disease, Hepatic System Disease, Hereditary Disorder, Metabolic Disease, Neurological Disease, Organismal Injury and Abnormalities, Psychological Disorders
PARP1	poly (ADP-ribose) polymerase 1	Nucleus	enzyme	veliparib, olaparib, INO-1001	P09874	x	diagnosis,efficacy,prognosis	Auditory Disease, Cancer, Cardiovascular Disease, Connective Tissue Disorders, Dermatological Diseases and Conditions, Developmental Disorder, Endocrine System Disorders, Gastrointestinal Disease, Hematological Disease, Hepatic System Disease, Hereditary Disorder, Immunological Disease, Infectious Disease, Inflammatory Disease, Inflammatory Response, Metabolic Disease, Neurological Disease, Nutri…
PC	pyruvate carboxylase	Cytoplasm	enzyme		P11498	x	unspecified application	Cancer, Developmental Disorder, Gastrointestinal Disease, Hematological Disease, Hereditary Disorder, Immunological Disease, Metabolic Disease
PDCD4	programmed cell death 4 (neoplastic transformation inhibitor)	Nucleus	other		Q53EL6	x	prognosis	Cancer, Cardiovascular Disease, Dermatological Diseases and Conditions, Endocrine System Disorders, Gastrointestinal Disease, Hematological Disease, Immunological Disease, Inflammatory Disease, Inflammatory Response, Metabolic Disease, Neurological Disease, Organismal Injury and Abnormalities, Skeletal and Muscular Disorders
PDGFRA	platelet-derived growth factor receptor, alpha polypeptide	Plasma Membrane	kinase	sunitinib, pazopanib, axitinib, telatinib, regorafenib, lapatinib/pazopanib, imatinib/sirolimus, imatinib, becaplermin	P16234	x	efficacy,prognosis,safety,unspecified application	Cancer, Cardiovascular Disease, Connective Tissue Disorders, Dermatological Diseases and Conditions, Developmental Disorder, Endocrine System Disorders, Gastrointestinal Disease, Hematological Disease, Hepatic System Disease, Hypersensitivity Response, Immunological Disease, Infectious Disease, Inflammatory Disease, Inflammatory Response, Metabolic Disease, Neurological Disease, Ophthalmic Diseas…
PDGFRB	platelet-derived growth factor receptor, beta polypeptide	Plasma Membrane	kinase	nilotinib, dasatinib, sunitinib, pazopanib, axitinib, tivozanib, tandutinib, regorafenib, bortezomib/sorafenib, lapatinib/pazopanib, dexamethasone/lenalidomide/sorafenib, bevacizumab/sorafenib, imatinib/sirolimus, imatinib, sorafenib, becaplermin	P09619	x	prognosis,response to therapy,unspecified application	Cancer, Cardiovascular Disease, Connective Tissue Disorders, Dermatological Diseases and Conditions, Endocrine System Disorders, Gastrointestinal Disease, Hematological Disease, Hepatic System Disease, Hereditary Disorder, Immunological Disease, Inflammatory Disease, Inflammatory Response, Metabolic Disease, Neurological Disease, Ophthalmic Disease, Organismal Injury and Abnormalities, Psychologi…
PDHA1	pyruvate dehydrogenase (lipoamide) alpha 1	Cytoplasm	enzyme		P08559	x	unspecified application	Cancer, Developmental Disorder, Gastrointestinal Disease, Hereditary Disorder, Metabolic Disease, Neurological Disease, Organismal Injury and Abnormalities, Skeletal and Muscular Disorders
PDLIM1	PDZ and LIM domain 1	Cytoplasm	transcription regulator		O00151	x	unspecified application	Cancer, Hereditary Disorder, Immunological Disease, Inflammatory Disease, Inflammatory Response, Neurological Disease, Organismal Injury and Abnormalities, Psychological Disorders, Renal and Urological Disease, Reproductive System Disease, Skeletal and Muscular Disorders
PDLIM4	PDZ and LIM domain 4	Plasma Membrane	other		P50479	x	diagnosis	Cancer, Connective Tissue Disorders, Dermatological Diseases and Conditions, Organismal Injury and Abnormalities, Reproductive System Disease, Skeletal and Muscular Disorders
PDLIM5	PDZ and LIM domain 5	Cytoplasm	other		Q96HC4	x	unspecified application	Cancer, Cardiovascular Disease, Gastrointestinal Disease, Hereditary Disorder, Neurological Disease, Organismal Injury and Abnormalities, Psychological Disorders, Reproductive System Disease
PDLIM7	PDZ and LIM domain 7 (enigma)	Cytoplasm	other		Q9NR12	x	unspecified application	Cancer, Hereditary Disorder, Neurological Disease, Organismal Injury and Abnormalities, Psychological Disorders, Renal and Urological Disease, Skeletal and Muscular Disorders
PDS5B	PDS5, regulator of cohesion maintenance, homolog B (S. cerevisiae)	Nucleus	other		Q9NTI5	x	diagnosis,disease progression	Cancer, Cardiovascular Disease, Connective Tissue Disorders, Dermatological Diseases and Conditions, Developmental Disorder, Endocrine System Disorders, Gastrointestinal Disease, Hematological Disease, Neurological Disease, Organismal Injury and Abnormalities, Reproductive System Disease, Respiratory Disease, Skeletal and Muscular Disorders
PEBP1	phosphatidylethanolamine binding protein 1	Cytoplasm	other		P30086	x	unspecified application	Cancer, Neurological Disease, Psychological Disorders, Skeletal and Muscular Disorders
PGR	progesterone receptor	Nucleus	ligand-dependent nuclear receptor	misoprostol, dienogest, ulipristal acetate, asoprisnil, ethynodiol diacetate, norethindrone acetate, ethinyl estradiol/ethynodiol diacetate, estradiol cypionate/medroxyprogesterone acetate, tosagestin, estradiol/norethindrone acetate, ZK 230211, etonogestrel, nestorone, ethinyl estradiol/etonogestrel, drospirenone/ethinyl estradiol/levomefolic acid, megestrol, leuprolide acetate/norethindrone ace…	P06401	x	diagnosis,efficacy,response to therapy,unspecified application	Cancer, Cardiovascular Disease, Dermatological Diseases and Conditions, Developmental Disorder, Endocrine System Disorders, Gastrointestinal Disease, Hematological Disease, Hepatic System Disease, Hereditary Disorder, Immunological Disease, Infectious Disease, Inflammatory Disease, Inflammatory Response, Metabolic Disease, Neurological Disease, Nutritional Disease, Ophthalmic Disease, Organismal …
PINK1	PTEN induced putative kinase 1	Cytoplasm	kinase		Q9BXM7	x	diagnosis	Cancer, Hereditary Disorder, Infectious Disease, Neurological Disease, Organismal Injury and Abnormalities, Psychological Disorders, Respiratory Disease, Skeletal and Muscular Disorders
PKM	pyruvate kinase, muscle	Cytoplasm	kinase		P14618	x	unspecified application	Cancer, Dermatological Diseases and Conditions, Endocrine System Disorders, Gastrointestinal Disease, Hepatic System Disease, Hereditary Disorder, Immunological Disease, Inflammatory Disease, Neurological Disease, Organismal Injury and Abnormalities, Psychological Disorders, Reproductive System Disease, Respiratory Disease, Skeletal and Muscular Disorders
PLK1	polo-like kinase 1	Nucleus	kinase	BI 2536, volasertib	P53350	x	unspecified application	Cancer, Gastrointestinal Disease, Hepatic System Disease, Infectious Disease, Organismal Injury and Abnormalities, Renal and Urological Disease, Reproductive System Disease, Respiratory Disease
POU5F1	POU class 5 homeobox 1	Nucleus	transcription regulator		Q01860	x	diagnosis,disease progression	Cancer, Endocrine System Disorders, Gastrointestinal Disease, Immunological Disease, Inflammatory Disease, Metabolic Disease, Neurological Disease, Organismal Injury and Abnormalities, Reproductive System Disease, Skeletal and Muscular Disorders
PPARA	peroxisome proliferator-activated receptor alpha	Nucleus	ligand-dependent nuclear receptor	choline fenofibrate, aleglitazar, choline fenofibrate/simvastatin, ezetimibe/fenofibrate, NS-220, tesaglitazar, bezafibrate, clofibrate, fenofibrate, docosahexaenoic acid, gemfibrozil	Q07869	x	diagnosis	Auditory Disease, Cancer, Cardiovascular Disease, Connective Tissue Disorders, Dermatological Diseases and Conditions, Developmental Disorder, Endocrine System Disorders, Gastrointestinal Disease, Hematological Disease, Hepatic System Disease, Hereditary Disorder, Hypersensitivity Response, Immunological Disease, Infectious Disease, Inflammatory Disease, Inflammatory Response, Metabolic Disease, …
PPP1R3A	protein phosphatase 1, regulatory subunit 3A	Cytoplasm	phosphatase		Q16821	x	unspecified application	Cancer, Connective Tissue Disorders, Endocrine System Disorders, Gastrointestinal Disease, Hereditary Disorder, Metabolic Disease, Neurological Disease, Nutritional Disease, Psychological Disorders, Respiratory Disease, Skeletal and Muscular Disorders
PRDM2	PR domain containing 2, with ZNF domain	Nucleus	transcription regulator		Q13029	x	diagnosis	Cancer, Gastrointestinal Disease, Hematological Disease, Immunological Disease, Infectious Disease, Neurological Disease, Organismal Injury and Abnormalities, Psychological Disorders, Reproductive System Disease, Respiratory Disease, Skeletal and Muscular Disorders
PRDX3	peroxiredoxin 3	Cytoplasm	enzyme		P30048	x	diagnosis	Cancer, Cardiovascular Disease, Developmental Disorder, Gastrointestinal Disease, Hematological Disease, Hepatic System Disease, Hereditary Disorder, Immunological Disease, Organismal Injury and Abnormalities, Skeletal and Muscular Disorders
PRDX6	peroxiredoxin 6	Cytoplasm	enzyme		P30041	x	unspecified application	Cancer, Cardiovascular Disease, Connective Tissue Disorders, Hematological Disease, Hereditary Disorder, Immunological Disease, Inflammatory Disease, Inflammatory Response, Neurological Disease, Organismal Injury and Abnormalities, Psychological Disorders, Respiratory Disease, Skeletal and Muscular Disorders
PRKCB	protein kinase C, beta	Cytoplasm	kinase	enzastaurin, ruboxistaurin, ingenol mebutate	P05771	x	diagnosis,efficacy,unspecified application	Cancer, Cardiovascular Disease, Connective Tissue Disorders, Dermatological Diseases and Conditions, Developmental Disorder, Endocrine System Disorders, Gastrointestinal Disease, Hematological Disease, Hepatic System Disease, Hereditary Disorder, Immunological Disease, Infectious Disease, Inflammatory Disease, Inflammatory Response, Metabolic Disease, Neurological Disease, Nutritional Disease, Op…
PRKCE	protein kinase C, epsilon	Cytoplasm	kinase	ingenol mebutate	Q02156	x	disease progression	Cancer, Cardiovascular Disease, Dermatological Diseases and Conditions, Developmental Disorder, Endocrine System Disorders, Gastrointestinal Disease, Hepatic System Disease, Hypersensitivity Response, Immunological Disease, Infectious Disease, Inflammatory Disease, Inflammatory Response, Metabolic Disease, Neurological Disease, Organismal Injury and Abnormalities, Psychological Disorders, Renal a…
PRKCH	protein kinase C, eta	Cytoplasm	kinase	ingenol mebutate	P24723	x	diagnosis	Cancer, Cardiovascular Disease, Dermatological Diseases and Conditions, Developmental Disorder, Gastrointestinal Disease, Immunological Disease, Infectious Disease, Neurological Disease, Organismal Injury and Abnormalities, Renal and Urological Disease, Reproductive System Disease
PRKCI	protein kinase C, iota	Cytoplasm	kinase	ingenol mebutate	P41743	x	unspecified application	Cancer, Cardiovascular Disease, Dermatological Diseases and Conditions, Developmental Disorder, Endocrine System Disorders, Gastrointestinal Disease, Hematological Disease, Immunological Disease, Infectious Disease, Inflammatory Response, Metabolic Disease, Neurological Disease, Organismal Injury and Abnormalities, Psychological Disorders, Reproductive System Disease, Respiratory Disease, Skeleta…
PRL	prolactin	Extracellular Space	cytokine		P01236	x	diagnosis,efficacy,safety	Cancer, Cardiovascular Disease, Connective Tissue Disorders, Dermatological Diseases and Conditions, Developmental Disorder, Endocrine System Disorders, Gastrointestinal Disease, Hematological Disease, Hereditary Disorder, Immunological Disease, Infectious Disease, Inflammatory Disease, Inflammatory Response, Neurological Disease, Nutritional Disease, Organismal Injury and Abnormalities, Psycholo…
PROM1	prominin 1	Plasma Membrane	other		O43490	x	diagnosis,disease progression,efficacy,prognosis	Cancer, Dermatological Diseases and Conditions, Endocrine System Disorders, Gastrointestinal Disease, Hereditary Disorder, Immunological Disease, Infectious Disease, Inflammatory Disease, Inflammatory Response, Neurological Disease, Ophthalmic Disease, Organismal Injury and Abnormalities, Reproductive System Disease, Respiratory Disease
PRRC2A	proline-rich coiled-coil 2A	Cytoplasm	other		P48634	x	safety	Cancer, Connective Tissue Disorders, Endocrine System Disorders, Gastrointestinal Disease, Immunological Disease, Inflammatory Disease, Metabolic Disease, Neurological Disease, Skeletal and Muscular Disorders
PSEN1	presenilin 1	Plasma Membrane	peptidase	tarenflurbil	P49768	x	diagnosis,unspecified application	Cancer, Cardiovascular Disease, Connective Tissue Disorders, Dermatological Diseases and Conditions, Developmental Disorder, Endocrine System Disorders, Gastrointestinal Disease, Hematological Disease, Hepatic System Disease, Hereditary Disorder, Immunological Disease, Infectious Disease, Inflammatory Disease, Inflammatory Response, Metabolic Disease, Neurological Disease, Nutritional Disease, Op…
PSEN2	presenilin 2 (Alzheimer disease 4)	Cytoplasm	peptidase	tarenflurbil	P49810	x	diagnosis	Cancer, Cardiovascular Disease, Dermatological Diseases and Conditions, Developmental Disorder, Hematological Disease, Hereditary Disorder, Immunological Disease, Infectious Disease, Inflammatory Disease, Inflammatory Response, Metabolic Disease, Neurological Disease, Ophthalmic Disease, Organismal Injury and Abnormalities, Psychological Disorders, Renal and Urological Disease, Respiratory Disease
PSIP1	PC4 and SFRS1 interacting protein 1	Nucleus	other		O75475	x	disease progression	Cancer, Hematological Disease, Immunological Disease, Infectious Disease, Neurological Disease, Organismal Injury and Abnormalities, Psychological Disorders, Renal and Urological Disease, Reproductive System Disease
PSMF1	proteasome (prosome, macropain) inhibitor subunit 1 (PI31)	Cytoplasm	other		Q92530	x	diagnosis	Cancer, Endocrine System Disorders, Gastrointestinal Disease
PTBP1	polypyrimidine tract binding protein 1	Nucleus	enzyme		P26599	x	unspecified application	Cancer, Organismal Injury and Abnormalities, Reproductive System Disease
PTEN	phosphatase and tensin homolog	Cytoplasm	phosphatase		P60484	x	diagnosis,disease progression,efficacy,prognosis,response to therapy	Cancer, Cardiovascular Disease, Connective Tissue Disorders, Dermatological Diseases and Conditions, Developmental Disorder, Endocrine System Disorders, Gastrointestinal Disease, Hematological Disease, Hepatic System Disease, Hereditary Disorder, Hypersensitivity Response, Immunological Disease, Infectious Disease, Inflammatory Disease, Inflammatory Response, Metabolic Disease, Neurological Disea…
PTK2	protein tyrosine kinase 2	Cytoplasm	kinase		Q05397	x	diagnosis,disease progression,efficacy,prognosis	Cancer, Cardiovascular Disease, Dermatological Diseases and Conditions, Developmental Disorder, Endocrine System Disorders, Gastrointestinal Disease, Hereditary Disorder, Hypersensitivity Response, Inflammatory Response, Neurological Disease, Organismal Injury and Abnormalities, Psychological Disorders, Reproductive System Disease, Skeletal and Muscular Disorders
PTPN1	protein tyrosine phosphatase, non-receptor type 1	Cytoplasm	phosphatase		P18031	x	prognosis	Cancer, Connective Tissue Disorders, Endocrine System Disorders, Gastrointestinal Disease, Hematological Disease, Hepatic System Disease, Immunological Disease, Infectious Disease, Inflammatory Response, Metabolic Disease, Neurological Disease, Nutritional Disease, Organismal Injury and Abnormalities, Psychological Disorders, Reproductive System Disease
PTPN3	protein tyrosine phosphatase, non-receptor type 3	Cytoplasm	phosphatase		P26045	x	unspecified application	Cancer, Dermatological Diseases and Conditions, Hereditary Disorder, Neurological Disease, Organismal Injury and Abnormalities, Psychological Disorders, Reproductive System Disease, Skeletal and Muscular Disorders
PTPN22	protein tyrosine phosphatase, non-receptor type 22 (lymphoid)	Cytoplasm	phosphatase		Q9Y2R2	x	unspecified application	Cancer, Connective Tissue Disorders, Dermatological Diseases and Conditions, Endocrine System Disorders, Gastrointestinal Disease, Immunological Disease, Inflammatory Disease, Inflammatory Response, Metabolic Disease, Neurological Disease, Organismal Injury and Abnormalities, Renal and Urological Disease, Reproductive System Disease, Skeletal and Muscular Disorders
PTPRC	protein tyrosine phosphatase, receptor type, C	Plasma Membrane	phosphatase		P08575	x	diagnosis,efficacy,unspecified application	Antimicrobial Response, Cancer, Connective Tissue Disorders, Dermatological Diseases and Conditions, Developmental Disorder, Endocrine System Disorders, Gastrointestinal Disease, Hematological Disease, Hepatic System Disease, Hereditary Disorder, Hypersensitivity Response, Immunological Disease, Infectious Disease, Inflammatory Disease, Inflammatory Response, Neurological Disease, Organismal Inju…
PTTG1	pituitary tumor-transforming 1	Nucleus	transcription regulator		O95997	x	prognosis	Cancer, Developmental Disorder, Endocrine System Disorders, Gastrointestinal Disease, Hematological Disease, Immunological Disease, Infectious Disease, Inflammatory Response, Metabolic Disease, Neurological Disease, Nutritional Disease, Organismal Injury and Abnormalities, Renal and Urological Disease, Reproductive System Disease, Respiratory Disease
PXN	paxillin	Cytoplasm	other		P49023	x	efficacy,prognosis,unspecified application	Cancer, Connective Tissue Disorders, Developmental Disorder, Immunological Disease, Inflammatory Disease, Inflammatory Response, Neurological Disease, Organismal Injury and Abnormalities, Reproductive System Disease, Skeletal and Muscular Disorders
RACGAP1	Rac GTPase activating protein 1	Cytoplasm	transporter		Q9H0H5	x	unspecified application	Cancer, Endocrine System Disorders, Infectious Disease, Organismal Injury and Abnormalities, Reproductive System Disease
RAF1	v-raf-1 murine leukemia viral oncogene homolog 1	Cytoplasm	kinase	CHIR-265, vemurafenib, dabrafenib, regorafenib, bortezomib/sorafenib, dexamethasone/lenalidomide/sorafenib, bevacizumab/sorafenib, dabrafenib/trametinib, sorafenib	P04049	x	efficacy	Cancer, Cardiovascular Disease, Connective Tissue Disorders, Dermatological Diseases and Conditions, Developmental Disorder, Endocrine System Disorders, Gastrointestinal Disease, Hematological Disease, Hepatic System Disease, Hereditary Disorder, Infectious Disease, Ophthalmic Disease, Organismal Injury and Abnormalities, Renal and Urological Disease, Reproductive System Disease, Respiratory Dise…
RANBP1	RAN binding protein 1	Nucleus	other		P43487	x	unspecified application	Cancer, Dermatological Diseases and Conditions, Developmental Disorder, Gastrointestinal Disease, Hereditary Disorder, Infectious Disease, Neurological Disease, Organismal Injury and Abnormalities, Psychological Disorders, Reproductive System Disease, Skeletal and Muscular Disorders
RASSF1	Ras association (RalGDS/AF-6) domain family member 1	Nucleus	other		Q9NS23	x	diagnosis,efficacy	Cancer, Cardiovascular Disease, Dermatological Diseases and Conditions, Developmental Disorder, Gastrointestinal Disease, Hematological Disease, Hepatic System Disease, Immunological Disease, Infectious Disease, Inflammatory Disease, Inflammatory Response, Neurological Disease, Organismal Injury and Abnormalities, Renal and Urological Disease, Reproductive System Disease, Respiratory Disease
RB1	retinoblastoma 1	Nucleus	transcription regulator		P06400	x	diagnosis,efficacy,prognosis,unspecified application	Auditory Disease, Cancer, Cardiovascular Disease, Connective Tissue Disorders, Dermatological Diseases and Conditions, Developmental Disorder, Endocrine System Disorders, Gastrointestinal Disease, Hematological Disease, Hepatic System Disease, Hereditary Disorder, Immunological Disease, Infectious Disease, Inflammatory Disease, Metabolic Disease, Neurological Disease, Nutritional Disease, Ophthal…
RBBP6	retinoblastoma binding protein 6	Nucleus	enzyme		Q7Z6E9	x	diagnosis	Cancer, Dermatological Diseases and Conditions, Developmental Disorder, Gastrointestinal Disease, Organismal Injury and Abnormalities, Reproductive System Disease
RBM12B	RNA binding motif protein 12B	Other	other		Q8IXT5	x	unspecified application	Inflammatory Response, Respiratory Disease
RCC1	regulator of chromosome condensation 1	Cytoplasm	other		P18754	x	unspecified application	Cancer, Hematological Disease, Immunological Disease, Metabolic Disease, Neurological Disease, Psychological Disorders, Respiratory Disease
RDX	radixin	Cytoplasm	other		P35241	x	unspecified application	Auditory Disease, Cancer, Endocrine System Disorders, Gastrointestinal Disease, Hepatic System Disease, Hereditary Disorder, Neurological Disease, Organismal Injury and Abnormalities, Reproductive System Disease, Respiratory Disease
RELA	v-rel avian reticuloendotheliosis viral oncogene homolog A	Nucleus	transcription regulator	NF-kappaB decoy	Q04206	x	diagnosis,efficacy	Antimicrobial Response, Cancer, Cardiovascular Disease, Connective Tissue Disorders, Developmental Disorder, Endocrine System Disorders, Gastrointestinal Disease, Hematological Disease, Hepatic System Disease, Hereditary Disorder, Immunological Disease, Infectious Disease, Inflammatory Disease, Inflammatory Response, Metabolic Disease, Neurological Disease, Ophthalmic Disease, Organismal Injury a…
RERE	arginine-glutamic acid dipeptide (RE) repeats	Nucleus	other		Q9P2R6	x	unspecified application	Auditory Disease, Cancer, Cardiovascular Disease, Dermatological Diseases and Conditions, Developmental Disorder, Hereditary Disorder, Immunological Disease, Neurological Disease, Ophthalmic Disease, Organismal Injury and Abnormalities, Psychological Disorders, Renal and Urological Disease, Reproductive System Disease, Skeletal and Muscular Disorders
RET	ret proto-oncogene	Plasma Membrane	kinase	sunitinib, motesanib, cabozantinib, regorafenib, ponatinib, bortezomib/sorafenib, dexamethasone/lenalidomide/sorafenib, bevacizumab/sorafenib, imatinib/sirolimus, imatinib, sorafenib, vandetanib	P07949	x	efficacy,response to therapy	Auditory Disease, Cancer, Cardiovascular Disease, Connective Tissue Disorders, Dermatological Diseases and Conditions, Developmental Disorder, Endocrine System Disorders, Gastrointestinal Disease, Hematological Disease, Hepatic System Disease, Hereditary Disorder, Immunological Disease, Inflammatory Disease, Inflammatory Response, Neurological Disease, Organismal Injury and Abnormalities, Psychol…
REV1	REV1, polymerase (DNA directed)	Nucleus	enzyme		Q9UBZ9	x	unspecified application	Developmental Disorder, Hereditary Disorder, Neurological Disease, Psychological Disorders, Skeletal and Muscular Disorders
RFX1	regulatory factor X, 1 (influences HLA class II expression)	Nucleus	transcription regulator		P22670	x	diagnosis	Cancer, Gastrointestinal Disease, Inflammatory Disease, Inflammatory Response, Neurological Disease
ROS1	c-ros oncogene 1 , receptor tyrosine kinase	Plasma Membrane	kinase		P08922	x	efficacy	Cancer, Gastrointestinal Disease, Neurological Disease, Organismal Injury and Abnormalities, Reproductive System Disease
RPL6	ribosomal protein L6	Cytoplasm	other		Q02878	x	unspecified application	Cancer, Hematological Disease, Organismal Injury and Abnormalities, Renal and Urological Disease, Reproductive System Disease
RPS3	ribosomal protein S3	Cytoplasm	enzyme		P23396	x	unspecified application	Cancer, Connective Tissue Disorders, Immunological Disease, Inflammatory Disease, Organismal Injury and Abnormalities, Reproductive System Disease, Skeletal and Muscular Disorders
RPS6	ribosomal protein S6	Cytoplasm	other		P62753	x	efficacy,response to therapy	Cancer, Hematological Disease, Infectious Disease, Organismal Injury and Abnormalities, Renal and Urological Disease, Respiratory Disease
RPS4X	ribosomal protein S4, X-linked	Cytoplasm	other		P62701	x	diagnosis	Cancer, Gastrointestinal Disease, Hematological Disease, Hepatic System Disease, Neurological Disease, Organismal Injury and Abnormalities, Psychological Disorders, Reproductive System Disease, Skeletal and Muscular Disorders
RPS6KB1	ribosomal protein S6 kinase, 70kDa, polypeptide 1	Cytoplasm	kinase		P23443	x	diagnosis,efficacy,prognosis	Cancer, Cardiovascular Disease, Dermatological Diseases and Conditions, Developmental Disorder, Endocrine System Disorders, Gastrointestinal Disease, Hematological Disease, Hereditary Disorder, Immunological Disease, Metabolic Disease, Neurological Disease, Nutritional Disease, Organismal Injury and Abnormalities, Psychological Disorders, Reproductive System Disease, Respiratory Disease
RSF1	remodeling and spacing factor 1	Nucleus	transcription regulator		Q96T23	x	prognosis	Cancer, Endocrine System Disorders, Gastrointestinal Disease, Organismal Injury and Abnormalities, Reproductive System Disease
RTN4	reticulon 4	Cytoplasm	other		Q9NQC3	x	diagnosis	Cancer, Cardiovascular Disease, Gastrointestinal Disease, Hereditary Disorder, Inflammatory Response, Neurological Disease, Organismal Injury and Abnormalities, Psychological Disorders, Skeletal and Muscular Disorders
RUNX2	runt-related transcription factor 2	Nucleus	transcription regulator		Q13950	x	disease progression,prognosis,unspecified application	Cancer, Cardiovascular Disease, Connective Tissue Disorders, Dental Disease, Dermatological Diseases and Conditions, Developmental Disorder, Endocrine System Disorders, Gastrointestinal Disease, Hematological Disease, Hepatic System Disease, Hereditary Disorder, Immunological Disease, Metabolic Disease, Organismal Injury and Abnormalities, Reproductive System Disease, Respiratory Disease, Skeleta…
SAFB2	scaffold attachment factor B2	Cytoplasm	other		Q14151	x	diagnosis	Cancer, Gastrointestinal Disease, Organismal Injury and Abnormalities, Reproductive System Disease
SAP30	Sin3A-associated protein, 30kDa	Nucleus	transcription regulator		O75446	x	unspecified application	Cancer, Inflammatory Response, Organismal Injury and Abnormalities, Reproductive System Disease, Respiratory Disease
SCARB2	scavenger receptor class B, member 2	Plasma Membrane	other		Q14108	x	disease progression	Auditory Disease, Cancer, Cardiovascular Disease, Gastrointestinal Disease, Hereditary Disorder, Infectious Disease, Metabolic Disease, Neurological Disease, Organismal Injury and Abnormalities, Psychological Disorders, Renal and Urological Disease, Skeletal and Muscular Disorders
SCD	stearoyl-CoA desaturase (delta-9-desaturase)	Cytoplasm	enzyme		O00767	x	diagnosis	Cancer, Cardiovascular Disease, Connective Tissue Disorders, Dermatological Diseases and Conditions, Developmental Disorder, Endocrine System Disorders, Gastrointestinal Disease, Hematological Disease, Hepatic System Disease, Hereditary Disorder, Immunological Disease, Inflammatory Disease, Inflammatory Response, Metabolic Disease, Neurological Disease, Nutritional Disease, Organismal Injury and …
SDC1	syndecan 1	Plasma Membrane	enzyme		P18827	x	efficacy	Auditory Disease, Cancer, Cardiovascular Disease, Connective Tissue Disorders, Dermatological Diseases and Conditions, Gastrointestinal Disease, Hematological Disease, Hereditary Disorder, Immunological Disease, Infectious Disease, Inflammatory Disease, Inflammatory Response, Metabolic Disease, Neurological Disease, Nutritional Disease, Organismal Injury and Abnormalities, Psychological Disorders…
SELP	selectin P (granule membrane protein 140kDa, antigen CD62)	Plasma Membrane	transmembrane receptor		P16109	x	efficacy,safety,unspecified application	Cancer, Cardiovascular Disease, Connective Tissue Disorders, Dermatological Diseases and Conditions, Endocrine System Disorders, Gastrointestinal Disease, Hematological Disease, Hereditary Disorder, Hypersensitivity Response, Immunological Disease, Infectious Disease, Inflammatory Disease, Inflammatory Response, Metabolic Disease, Neurological Disease, Nutritional Disease, Organismal Injury and A…
SEMA6D	sema domain, transmembrane domain (TM), and cytoplasmic domain, (semaphorin) 6D	Plasma Membrane	other		Q8NFY4	x	safety	Cancer, Gastrointestinal Disease, Organismal Injury and Abnormalities, Reproductive System Disease
SERPINA1	serpin peptidase inhibitor, clade A (alpha-1 antiproteinase, antitrypsin), member 1	Extracellular Space	other		P01009	x	diagnosis,unspecified application	Cancer, Dermatological Diseases and Conditions, Developmental Disorder, Endocrine System Disorders, Gastrointestinal Disease, Hepatic System Disease, Hereditary Disorder, Infectious Disease, Inflammatory Disease, Inflammatory Response, Metabolic Disease, Neurological Disease, Organismal Injury and Abnormalities, Psychological Disorders, Reproductive System Disease, Respiratory Disease, Skeletal a…
SERPINB3	serpin peptidase inhibitor, clade B (ovalbumin), member 3	Cytoplasm	other		P29508	x	diagnosis	Antimicrobial Response, Cancer, Dermatological Diseases and Conditions, Gastrointestinal Disease, Immunological Disease, Infectious Disease, Inflammatory Disease, Inflammatory Response, Organismal Injury and Abnormalities, Reproductive System Disease
SERPINB5	serpin peptidase inhibitor, clade B (ovalbumin), member 5	Extracellular Space	other		P36952	x	disease progression,efficacy	Cancer, Cardiovascular Disease, Connective Tissue Disorders, Dermatological Diseases and Conditions, Hematological Disease, Immunological Disease, Inflammatory Disease, Inflammatory Response, Organismal Injury and Abnormalities, Reproductive System Disease, Respiratory Disease, Skeletal and Muscular Disorders
SFRP4	secreted frizzled-related protein 4	Plasma Membrane	transmembrane receptor		Q6FHJ7	x	diagnosis	Cancer, Gastrointestinal Disease, Organismal Injury and Abnormalities, Reproductive System Disease
SKP2	S-phase kinase-associated protein 2, E3 ubiquitin protein ligase	Nucleus	other		Q13309	x	diagnosis	Cancer, Developmental Disorder, Endocrine System Disorders, Gastrointestinal Disease, Hematological Disease, Hepatic System Disease, Hereditary Disorder, Immunological Disease, Metabolic Disease, Neurological Disease, Organismal Injury and Abnormalities, Psychological Disorders, Renal and Urological Disease, Reproductive System Disease, Respiratory Disease, Skeletal and Muscular Disorders
SLC16A1	solute carrier family 16 (monocarboxylate transporter), member 1	Plasma Membrane	transporter		P53985	x	diagnosis	Cancer, Dermatological Diseases and Conditions, Endocrine System Disorders, Gastrointestinal Disease, Hereditary Disorder, Metabolic Disease, Neurological Disease, Organismal Injury and Abnormalities, Reproductive System Disease, Skeletal and Muscular Disorders
SLC2A4	solute carrier family 2 (facilitated glucose transporter), member 4	Plasma Membrane	transporter		P14672	x	unspecified application	Cancer, Cardiovascular Disease, Connective Tissue Disorders, Developmental Disorder, Endocrine System Disorders, Gastrointestinal Disease, Hepatic System Disease, Hereditary Disorder, Inflammatory Response, Metabolic Disease, Neurological Disease, Nutritional Disease, Organismal Injury and Abnormalities, Psychological Disorders, Skeletal and Muscular Disorders
SLC39A6	solute carrier family 39 (zinc transporter), member 6	Plasma Membrane	transporter		Q13433	x	disease progression	Cancer, Dermatological Diseases and Conditions, Gastrointestinal Disease, Hepatic System Disease, Organismal Injury and Abnormalities, Reproductive System Disease
SLC9A3	solute carrier family 9, subfamily A (NHE3, cation proton antiporter 3), member 3	Plasma Membrane	ion channel		P48764	x	unspecified application	Cancer, Cardiovascular Disease, Gastrointestinal Disease, Infectious Disease, Metabolic Disease, Organismal Injury and Abnormalities, Renal and Urological Disease, Reproductive System Disease
SMAD4	SMAD family member 4	Nucleus	transcription regulator		Q13485	x	prognosis	Auditory Disease, Cancer, Cardiovascular Disease, Connective Tissue Disorders, Dental Disease, Dermatological Diseases and Conditions, Developmental Disorder, Endocrine System Disorders, Gastrointestinal Disease, Hematological Disease, Hepatic System Disease, Hereditary Disorder, Inflammatory Disease, Inflammatory Response, Neurological Disease, Ophthalmic Disease, Organismal Injury and Abnormali…
SMARCB1	SWI/SNF related, matrix associated, actin dependent regulator of chromatin, subfamily b, member 1	Nucleus	transcription regulator		Q12824	x	diagnosis	Cancer, Dermatological Diseases and Conditions, Developmental Disorder, Endocrine System Disorders, Gastrointestinal Disease, Hematological Disease, Hereditary Disorder, Immunological Disease, Infectious Disease, Metabolic Disease, Neurological Disease, Organismal Injury and Abnormalities, Renal and Urological Disease, Skeletal and Muscular Disorders
SMTN	smoothelin	Extracellular Space	other		P53814	x	unspecified application	Cancer, Cardiovascular Disease, Developmental Disorder, Gastrointestinal Disease, Hereditary Disorder, Infectious Disease, Inflammatory Response, Neurological Disease, Organismal Injury and Abnormalities, Psychological Disorders, Renal and Urological Disease, Reproductive System Disease, Skeletal and Muscular Disorders
SNAP25	synaptosomal-associated protein, 25kDa	Plasma Membrane	transporter	botulinum toxin type A	P60880	x	unspecified application	Cancer, Cardiovascular Disease, Connective Tissue Disorders, Dermatological Diseases and Conditions, Developmental Disorder, Gastrointestinal Disease, Hereditary Disorder, Inflammatory Disease, Neurological Disease, Ophthalmic Disease, Organismal Injury and Abnormalities, Psychological Disorders, Renal and Urological Disease, Reproductive System Disease, Respiratory Disease, Skeletal and Muscular…
SND1	staphylococcal nuclease and tudor domain containing 1	Nucleus	enzyme		Q7KZF4	x	unspecified application	Cancer, Connective Tissue Disorders, Hereditary Disorder, Immunological Disease, Inflammatory Disease, Neurological Disease, Organismal Injury and Abnormalities, Psychological Disorders, Reproductive System Disease, Respiratory Disease, Skeletal and Muscular Disorders
SOX9	SRY (sex determining region Y)-box 9	Nucleus	transcription regulator		P48436	x	disease progression,prognosis	Cancer, Cardiovascular Disease, Connective Tissue Disorders, Dermatological Diseases and Conditions, Developmental Disorder, Endocrine System Disorders, Gastrointestinal Disease, Hepatic System Disease, Hereditary Disorder, Inflammatory Disease, Neurological Disease, Organismal Injury and Abnormalities, Psychological Disorders, Reproductive System Disease, Skeletal and Muscular Disorders
SPARCL1	SPARC-like 1 (hevin)	Extracellular Space	other		Q14515	x	disease progression	Cancer, Cardiovascular Disease, Gastrointestinal Disease, Hepatic System Disease, Neurological Disease, Organismal Injury and Abnormalities, Psychological Disorders, Reproductive System Disease, Skeletal and Muscular Disorders
SPP1	secreted phosphoprotein 1	Extracellular Space	cytokine		P10451	x	diagnosis,efficacy,unspecified application	Cancer, Cardiovascular Disease, Connective Tissue Disorders, Dermatological Diseases and Conditions, Developmental Disorder, Endocrine System Disorders, Gastrointestinal Disease, Hematological Disease, Hepatic System Disease, Hereditary Disorder, Immunological Disease, Infectious Disease, Inflammatory Disease, Inflammatory Response, Metabolic Disease, Neurological Disease, Nutritional Disease, Op…
SRC	v-src avian sarcoma (Schmidt-Ruppin A-2) viral oncogene homolog	Cytoplasm	kinase	dasatinib, AZM-475271, saracatinib, bosutinib	P12931	x	diagnosis,disease progression,efficacy,prognosis,response to therapy	Cancer, Cardiovascular Disease, Connective Tissue Disorders, Dermatological Diseases and Conditions, Developmental Disorder, Endocrine System Disorders, Gastrointestinal Disease, Hematological Disease, Hereditary Disorder, Immunological Disease, Inflammatory Disease, Inflammatory Response, Neurological Disease, Organismal Injury and Abnormalities, Renal and Urological Disease, Reproductive System…
SSX2IP	synovial sarcoma, X breakpoint 2 interacting protein	Plasma Membrane	other		Q9Y2D8	x	unspecified application	Cancer, Cardiovascular Disease, Gastrointestinal Disease, Hepatic System Disease, Hereditary Disorder, Neurological Disease, Psychological Disorders, Skeletal and Muscular Disorders
STAT3	signal transducer and activator of transcription 3 (acute-phase response factor)	Nucleus	transcription regulator		P40763	x	diagnosis,efficacy,prognosis,response to therapy	Cancer, Cardiovascular Disease, Connective Tissue Disorders, Dermatological Diseases and Conditions, Developmental Disorder, Endocrine System Disorders, Gastrointestinal Disease, Hematological Disease, Hepatic System Disease, Hereditary Disorder, Hypersensitivity Response, Immunological Disease, Infectious Disease, Inflammatory Disease, Inflammatory Response, Metabolic Disease, Neurological Disea…
STAT5A	signal transducer and activator of transcription 5A	Nucleus	transcription regulator		P42229	x	response to therapy	Cancer, Cardiovascular Disease, Gastrointestinal Disease, Hematological Disease, Hypersensitivity Response, Immunological Disease, Infectious Disease, Inflammatory Disease, Inflammatory Response, Nutritional Disease, Organismal Injury and Abnormalities, Reproductive System Disease
STIM2	stromal interaction molecule 2	Plasma Membrane	transporter		Q9P246	x	efficacy	Cancer, Developmental Disorder, Gastrointestinal Disease, Organismal Injury and Abnormalities, Reproductive System Disease
STK11	serine/threonine kinase 11	Cytoplasm	kinase		Q15831	x	diagnosis	Cancer, Connective Tissue Disorders, Dermatological Diseases and Conditions, Developmental Disorder, Endocrine System Disorders, Gastrointestinal Disease, Hematological Disease, Hepatic System Disease, Hereditary Disorder, Immunological Disease, Inflammatory Response, Neurological Disease, Organismal Injury and Abnormalities, Reproductive System Disease, Respiratory Disease, Skeletal and Muscular…
STMN1	stathmin 1	Cytoplasm	other		P16949	x	efficacy	Cancer, Hematological Disease, Immunological Disease, Inflammatory Disease, Neurological Disease, Organismal Injury and Abnormalities, Psychological Disorders, Renal and Urological Disease, Respiratory Disease, Skeletal and Muscular Disorders
SYK	spleen tyrosine kinase	Cytoplasm	kinase	R-348	P43405	x	response to therapy	Antimicrobial Response, Cancer, Cardiovascular Disease, Connective Tissue Disorders, Dermatological Diseases and Conditions, Gastrointestinal Disease, Hematological Disease, Hepatic System Disease, Hypersensitivity Response, Immunological Disease, Inflammatory Disease, Inflammatory Response, Neurological Disease, Ophthalmic Disease, Organismal Injury and Abnormalities, Psychological Disorders, Re…
TACC2	transforming, acidic coiled-coil containing protein 2	Nucleus	other		O95359	x	diagnosis	Cancer, Dermatological Diseases and Conditions, Gastrointestinal Disease, Hepatic System Disease
TAGLN	transgelin	Cytoplasm	other		Q01995	x	diagnosis	Cancer, Connective Tissue Disorders, Dermatological Diseases and Conditions, Developmental Disorder, Gastrointestinal Disease, Hereditary Disorder, Metabolic Disease, Neurological Disease, Organismal Injury and Abnormalities, Psychological Disorders, Renal and Urological Disease, Reproductive System Disease
TARDBP	TAR DNA binding protein	Nucleus	transcription regulator		Q13148	x	unspecified application	Cancer, Gastrointestinal Disease, Hereditary Disorder, Neurological Disease, Organismal Injury and Abnormalities, Psychological Disorders, Reproductive System Disease, Skeletal and Muscular Disorders
TCF3	transcription factor 3	Nucleus	transcription regulator		P15923	x	unspecified application	Cancer, Dermatological Diseases and Conditions, Developmental Disorder, Hematological Disease, Immunological Disease, Infectious Disease, Inflammatory Response, Metabolic Disease, Organismal Injury and Abnormalities, Reproductive System Disease
TEK	TEK tyrosine kinase, endothelial	Plasma Membrane	kinase	cabozantinib, regorafenib, ponatinib, vandetanib	Q02763	x	efficacy	Auditory Disease, Cancer, Cardiovascular Disease, Dermatological Diseases and Conditions, Developmental Disorder, Endocrine System Disorders, Gastrointestinal Disease, Hematological Disease, Hepatic System Disease, Hereditary Disorder, Immunological Disease, Inflammatory Response, Metabolic Disease, Organismal Injury and Abnormalities, Renal and Urological Disease, Reproductive System Disease, Re…
TFAP2A	transcription factor AP-2 alpha (activating enhancer binding protein 2 alpha)	Nucleus	transcription regulator		P05549	x	diagnosis,prognosis	Cancer, Cardiovascular Disease, Connective Tissue Disorders, Dermatological Diseases and Conditions, Developmental Disorder, Endocrine System Disorders, Hereditary Disorder, Neurological Disease, Ophthalmic Disease, Organismal Injury and Abnormalities, Reproductive System Disease, Respiratory Disease, Skeletal and Muscular Disorders
TFRC	transferrin receptor	Plasma Membrane	transporter		P02786	x	diagnosis,efficacy	Cancer, Cardiovascular Disease, Connective Tissue Disorders, Developmental Disorder, Gastrointestinal Disease, Hematological Disease, Immunological Disease, Infectious Disease, Inflammatory Disease, Neurological Disease, Organismal Injury and Abnormalities, Renal and Urological Disease, Reproductive System Disease, Respiratory Disease, Skeletal and Muscular Disorders
TGFBR1	transforming growth factor, beta receptor 1	Plasma Membrane	kinase		P36897	x	disease progression,prognosis	Cancer, Cardiovascular Disease, Connective Tissue Disorders, Dermatological Diseases and Conditions, Developmental Disorder, Endocrine System Disorders, Gastrointestinal Disease, Hereditary Disorder, Immunological Disease, Infectious Disease, Inflammatory Disease, Inflammatory Response, Neurological Disease, Ophthalmic Disease, Organismal Injury and Abnormalities, Renal and Urological Disease, Re…
TLN1	talin 1	Plasma Membrane	other		Q9Y490	x	unspecified application	Cancer, Cardiovascular Disease, Dermatological Diseases and Conditions, Developmental Disorder, Gastrointestinal Disease, Inflammatory Response, Organismal Injury and Abnormalities, Reproductive System Disease
TLR4	toll-like receptor 4	Plasma Membrane	transmembrane receptor	resatorvid	O00206	x	efficacy	Antimicrobial Response, Auditory Disease, Cancer, Cardiovascular Disease, Connective Tissue Disorders, Dermatological Diseases and Conditions, Developmental Disorder, Endocrine System Disorders, Gastrointestinal Disease, Hematological Disease, Hepatic System Disease, Hypersensitivity Response, Immunological Disease, Infectious Disease, Inflammatory Disease, Inflammatory Response, Metabolic Diseas…
TMEM27	transmembrane protein 27	Plasma Membrane	other		Q9HBJ8	x	unspecified application	Cancer, Metabolic Disease, Nutritional Disease, Organismal Injury and Abnormalities, Psychological Disorders, Renal and Urological Disease, Respiratory Disease
TNFRSF8	tumor necrosis factor receptor superfamily, member 8	Plasma Membrane	transmembrane receptor	HeFi-1 monoclonal antibody, brentuximab vedotin	P28908	x	diagnosis	Cancer, Dermatological Diseases and Conditions, Hematological Disease, Immunological Disease, Inflammatory Disease, Inflammatory Response, Organismal Injury and Abnormalities, Reproductive System Disease, Respiratory Disease
TNFRSF10A	tumor necrosis factor receptor superfamily, member 10a	Plasma Membrane	transmembrane receptor	trm-1	O00220	x	diagnosis	Cancer, Connective Tissue Disorders, Dermatological Diseases and Conditions, Gastrointestinal Disease, Hematological Disease, Hepatic System Disease, Immunological Disease, Infectious Disease, Inflammatory Disease, Inflammatory Response, Organismal Injury and Abnormalities, Renal and Urological Disease, Reproductive System Disease, Skeletal and Muscular Disorders
TNFRSF1A	tumor necrosis factor receptor superfamily, member 1A	Plasma Membrane	transmembrane receptor		P19438	x	safety,unspecified application	Antimicrobial Response, Cancer, Cardiovascular Disease, Connective Tissue Disorders, Dermatological Diseases and Conditions, Endocrine System Disorders, Gastrointestinal Disease, Hematological Disease, Hepatic System Disease, Hereditary Disorder, Hypersensitivity Response, Immunological Disease, Infectious Disease, Inflammatory Disease, Inflammatory Response, Metabolic Disease, Neurological Disea…
TNFSF10	tumor necrosis factor (ligand) superfamily, member 10	Extracellular Space	cytokine		P50591	x	efficacy	Cancer, Cardiovascular Disease, Connective Tissue Disorders, Dermatological Diseases and Conditions, Developmental Disorder, Endocrine System Disorders, Gastrointestinal Disease, Hematological Disease, Hepatic System Disease, Immunological Disease, Infectious Disease, Inflammatory Disease, Inflammatory Response, Metabolic Disease, Neurological Disease, Organismal Injury and Abnormalities, Renal a…
TNNI2	troponin I type 2 (skeletal, fast)	Cytoplasm	enzyme		P48788	x	unspecified application	Cancer, Connective Tissue Disorders, Dermatological Diseases and Conditions, Developmental Disorder, Hereditary Disorder, Neurological Disease, Psychological Disorders, Skeletal and Muscular Disorders
TNNI3	troponin I type 3 (cardiac)	Cytoplasm	transporter		P19429	x	diagnosis,efficacy,unspecified application	Cancer, Cardiovascular Disease, Hereditary Disorder, Infectious Disease, Inflammatory Disease, Inflammatory Response, Neurological Disease, Organismal Injury and Abnormalities, Renal and Urological Disease, Reproductive System Disease, Respiratory Disease, Skeletal and Muscular Disorders
TNS4	tensin 4	Cytoplasm	other		Q8IZW8	x	unspecified application	Cancer, Dermatological Diseases and Conditions, Endocrine System Disorders, Gastrointestinal Disease, Organismal Injury and Abnormalities, Reproductive System Disease, Respiratory Disease
TOP1	topoisomerase (DNA) I	Nucleus	enzyme	elsamitrucin, T 0128, polyglutamate camptothecin, BN 80927, tafluposide, cetuximab/irinotecan, capecitabine/irinotecan, 5-fluorouracil/irinotecan, cisplatin/topotecan, cyclophosphamide/topotecan, cyclophosphamide/topotecan/vincristine, irinotecan/temozolomide, irinotecan/vincristine, cyclophosphamide/irinotecan/temozolomide, irinotecan/temozolomide/vincristine, bevacizumab/irinotecan, bevacizumab…	P11387	x	efficacy	Cancer, Connective Tissue Disorders, Dermatological Diseases and Conditions, Endocrine System Disorders, Gastrointestinal Disease, Hematological Disease, Hereditary Disorder, Immunological Disease, Inflammatory Disease, Neurological Disease, Organismal Injury and Abnormalities, Psychological Disorders, Reproductive System Disease, Respiratory Disease, Skeletal and Muscular Disorders
TOP2A	topoisomerase (DNA) II alpha 170kDa	Nucleus	enzyme	novobiocin, etoposide, teniposide, CPI-0004Na, becatecarin, elsamitrucin, AQ4N, BN 80927, tafluposide, fleroxacin, cyclophosphamide/epirubicin/5-fluorouracil, cytarabine/daunorubicin, hydrocortisone/mitoxantrone, mitoxantrone/prednisone, cladribine/cytarabine/daunorubicin, cytarabine/daunorubicin/tretinoin, cytarabine/idarubicin, idarubicin/mitoxantrone/tretinoin, arsenic trioxide/daunorubicin/tr…	P11388	x	diagnosis,efficacy,prognosis,response to therapy	Auditory Disease, Cancer, Cardiovascular Disease, Dermatological Diseases and Conditions, Endocrine System Disorders, Gastrointestinal Disease, Hematological Disease, Hepatic System Disease, Hereditary Disorder, Immunological Disease, Infectious Disease, Inflammatory Disease, Inflammatory Response, Neurological Disease, Nutritional Disease, Ophthalmic Disease, Organismal Injury and Abnormalities,…
TP53	tumor protein p53	Nucleus	transcription regulator		P04637	x	diagnosis,disease progression,efficacy,prognosis,response to therapy,unspecified application	Antimicrobial Response, Cancer, Cardiovascular Disease, Connective Tissue Disorders, Dermatological Diseases and Conditions, Developmental Disorder, Endocrine System Disorders, Gastrointestinal Disease, Hematological Disease, Hepatic System Disease, Hereditary Disorder, Immunological Disease, Infectious Disease, Inflammatory Disease, Inflammatory Response, Metabolic Disease, Neurological Disease,…
TP63	tumor protein p63	Nucleus	transcription regulator		Q9H3D4	x	diagnosis,efficacy,prognosis,unspecified application	Cancer, Connective Tissue Disorders, Dermatological Diseases and Conditions, Developmental Disorder, Endocrine System Disorders, Gastrointestinal Disease, Hematological Disease, Hereditary Disorder, Immunological Disease, Infectious Disease, Inflammatory Disease, Inflammatory Response, Metabolic Disease, Neurological Disease, Organismal Injury and Abnormalities, Renal and Urological Disease, Repr…
TPD52L2	tumor protein D52-like 2	Cytoplasm	other		O43399	x	prognosis,unspecified application	Cancer, Endocrine System Disorders, Hereditary Disorder, Neurological Disease, Organismal Injury and Abnormalities, Psychological Disorders, Reproductive System Disease, Skeletal and Muscular Disorders
TPI1	triosephosphate isomerase 1	Cytoplasm	enzyme		P60174	x	diagnosis,unspecified application	Cancer, Cardiovascular Disease, Dermatological Diseases and Conditions, Gastrointestinal Disease, Hematological Disease, Hepatic System Disease, Hereditary Disorder, Immunological Disease, Inflammatory Disease, Inflammatory Response, Metabolic Disease, Neurological Disease, Organismal Injury and Abnormalities, Psychological Disorders, Reproductive System Disease, Respiratory Disease, Skeletal and…
TRPS1	trichorhinophalangeal syndrome I	Nucleus	transcription regulator		Q9UHF7	x	diagnosis,prognosis	Cancer, Connective Tissue Disorders, Dental Disease, Dermatological Diseases and Conditions, Developmental Disorder, Gastrointestinal Disease, Hereditary Disorder, Neurological Disease, Organismal Injury and Abnormalities, Reproductive System Disease, Respiratory Disease, Skeletal and Muscular Disorders
TSPAN8	tetraspanin 8	Plasma Membrane	other		P19075	x	unspecified application	Cancer, Dermatological Diseases and Conditions, Endocrine System Disorders, Gastrointestinal Disease, Hepatic System Disease, Metabolic Disease, Neurological Disease
TUBA1A	tubulin, alpha 1a	Cytoplasm	other	epothilone B, colchicine/probenecid, larotaxel, eribulin, davunetide, vintafolide, milataxel, cevipabulin, gemcitabine/paclitaxel, docetaxel/prednisone, cyclophosphamide/prednisone/vincristine, docetaxel/hydrocortisone, cyclophosphamide/docetaxel, gemcitabine/vinorelbine, cyclophosphamide/daunorubicin/imatinib/prednisone/vincristine, cyclophosphamide/topotecan/vincristine, docetaxel/gemcitabine, …	Q71U36	x	unspecified application	Cancer, Cardiovascular Disease, Connective Tissue Disorders, Dermatological Diseases and Conditions, Developmental Disorder, Endocrine System Disorders, Gastrointestinal Disease, Hematological Disease, Hereditary Disorder, Immunological Disease, Infectious Disease, Inflammatory Disease, Inflammatory Response, Metabolic Disease, Neurological Disease, Ophthalmic Disease, Organismal Injury and Abnor…
TUBA1B	tubulin, alpha 1b	Cytoplasm	other		P68363	x	diagnosis,efficacy	Cancer, Neurological Disease, Organismal Injury and Abnormalities, Psychological Disorders, Reproductive System Disease, Skeletal and Muscular Disorders
TUBB	tubulin, beta class I	Cytoplasm	other	ixabepilone, colchicine/probenecid, brentuximab vedotin, cabazitaxel, 6-mercaptopurine/methotrexate/prednisone/vincristine, dexamethasone/doxorubicin/vincristine, gemcitabine/vinorelbine, docetaxel/gemcitabine/vincristine, irinotecan/vincristine, trastuzumab/vinorelbine, methotrexate/vinorelbine, vinorelbine, vincristine, podophyllotoxin, colchicine	P07437	x	efficacy	Cancer, Cardiovascular Disease, Connective Tissue Disorders, Dermatological Diseases and Conditions, Developmental Disorder, Endocrine System Disorders, Gastrointestinal Disease, Hematological Disease, Hereditary Disorder, Immunological Disease, Infectious Disease, Inflammatory Disease, Inflammatory Response, Metabolic Disease, Neurological Disease, Ophthalmic Disease, Organismal Injury and Abnor…
TUBB3	tubulin, beta 3 class III	Cytoplasm	other	epothilone B, ixabepilone, colchicine/probenecid, larotaxel, ABT-751, eribulin, simotaxel, davunetide, vintafolide, milataxel, cevipabulin, brentuximab vedotin, cabazitaxel, gemcitabine/paclitaxel, docetaxel/prednisone, paclitaxel/trastuzumab, capecitabine/ixabepilone, cyclophosphamide/prednisone/vincristine, docetaxel/hydrocortisone, cyclophosphamide/docetaxel, gemcitabine/vinorelbine, cyclophos…	Q13509	x	response to therapy	Cancer, Cardiovascular Disease, Connective Tissue Disorders, Dermatological Diseases and Conditions, Developmental Disorder, Endocrine System Disorders, Gastrointestinal Disease, Hematological Disease, Hereditary Disorder, Immunological Disease, Infectious Disease, Inflammatory Disease, Inflammatory Response, Metabolic Disease, Neurological Disease, Ophthalmic Disease, Organismal Injury and Abnor…
TWIST1	twist family bHLH transcription factor 1	Nucleus	transcription regulator		Q15672	x	efficacy	Cancer, Cardiovascular Disease, Connective Tissue Disorders, Dermatological Diseases and Conditions, Developmental Disorder, Endocrine System Disorders, Gastrointestinal Disease, Hematological Disease, Hepatic System Disease, Hereditary Disorder, Immunological Disease, Inflammatory Disease, Inflammatory Response, Neurological Disease, Nutritional Disease, Organismal Injury and Abnormalities, Repr…
UBA2	ubiquitin-like modifier activating enzyme 2	Cytoplasm	enzyme		Q9UBT2	x	unspecified application	Cancer, Organismal Injury and Abnormalities, Reproductive System Disease
UTRN	utrophin	Plasma Membrane	transmembrane receptor		P46939	x	efficacy	Cancer, Cardiovascular Disease, Developmental Disorder, Gastrointestinal Disease, Hereditary Disorder, Inflammatory Disease, Inflammatory Response, Organismal Injury and Abnormalities, Reproductive System Disease, Skeletal and Muscular Disorders
VCL	vinculin	Plasma Membrane	enzyme		P18206	x	unspecified application	Cancer, Cardiovascular Disease, Connective Tissue Disorders, Dermatological Diseases and Conditions, Developmental Disorder, Hereditary Disorder, Immunological Disease, Inflammatory Disease, Inflammatory Response, Organismal Injury and Abnormalities, Reproductive System Disease, Skeletal and Muscular Disorders
VDR	vitamin D (1,25- dihydroxyvitamin D3) receptor	Nucleus	transcription regulator	calcipotriene, ergocalciferol, ILX-23-7553, alendronate/cholecalciferol, 2-(3-hydroxypropoxy)calcitriol, betamethasone dipropionate/calcipotriene, alfacalcidol, calcium carbonate/cholecalciferol, paricalcitol, doxercalciferol, cholecalciferol, calcitriol, calcifediol	P11473	x	prognosis,response to therapy	Cancer, Cardiovascular Disease, Connective Tissue Disorders, Dermatological Diseases and Conditions, Developmental Disorder, Endocrine System Disorders, Gastrointestinal Disease, Hematological Disease, Hereditary Disorder, Immunological Disease, Infectious Disease, Inflammatory Disease, Inflammatory Response, Metabolic Disease, Neurological Disease, Nutritional Disease, Organismal Injury and Abno…
VHL	von Hippel-Lindau tumor suppressor, E3 ubiquitin protein ligase	Nucleus	transcription regulator		P40337	x	diagnosis,efficacy	Cancer, Cardiovascular Disease, Connective Tissue Disorders, Dermatological Diseases and Conditions, Developmental Disorder, Gastrointestinal Disease, Hematological Disease, Hepatic System Disease, Hereditary Disorder, Immunological Disease, Inflammatory Disease, Inflammatory Response, Neurological Disease, Organismal Injury and Abnormalities, Renal and Urological Disease, Reproductive System Dis…
VIM	vimentin	Cytoplasm	other		P08670	x	diagnosis,efficacy,prognosis	Cancer, Cardiovascular Disease, Connective Tissue Disorders, Dermatological Diseases and Conditions, Developmental Disorder, Endocrine System Disorders, Gastrointestinal Disease, Hematological Disease, Hepatic System Disease, Hereditary Disorder, Immunological Disease, Inflammatory Disease, Inflammatory Response, Metabolic Disease, Neurological Disease, Nutritional Disease, Ophthalmic Disease, Or…
WDR19	WD repeat domain 19	Extracellular Space	other		Q8NEZ3	x	diagnosis,prognosis	Cancer, Cardiovascular Disease, Connective Tissue Disorders, Dermatological Diseases and Conditions, Developmental Disorder, Hereditary Disorder, Organismal Injury and Abnormalities, Renal and Urological Disease, Reproductive System Disease, Skeletal and Muscular Disorders
XDH	xanthine dehydrogenase	Cytoplasm	enzyme	allopurinol, febuxostat	P47989	x	unspecified application	Cancer, Cardiovascular Disease, Connective Tissue Disorders, Developmental Disorder, Endocrine System Disorders, Gastrointestinal Disease, Hematological Disease, Hereditary Disorder, Immunological Disease, Inflammatory Disease, Inflammatory Response, Metabolic Disease, Neurological Disease, Nutritional Disease, Organismal Injury and Abnormalities, Psychological Disorders, Renal and Urological Dis…
XIAP	X-linked inhibitor of apoptosis	Cytoplasm	enzyme		P98170	x	diagnosis,efficacy	Cancer, Cardiovascular Disease, Connective Tissue Disorders, Gastrointestinal Disease, Hematological Disease, Hepatic System Disease, Hereditary Disorder, Immunological Disease, Infectious Disease, Inflammatory Disease, Inflammatory Response, Metabolic Disease, Neurological Disease, Organismal Injury and Abnormalities, Psychological Disorders, Renal and Urological Disease, Reproductive System Dis…
XPC	xeroderma pigmentosum, complementation group C	Nucleus	other		Q01831	x	diagnosis	Cancer, Dermatological Diseases and Conditions, Developmental Disorder, Gastrointestinal Disease, Hepatic System Disease, Hereditary Disorder, Neurological Disease, Nutritional Disease, Organismal Injury and Abnormalities, Renal and Urological Disease, Reproductive System Disease, Respiratory Disease
XPO1	exportin 1 (CRM1 homolog, yeast)	Nucleus	transporter		O14980	x	diagnosis,efficacy	Cancer, Hematological Disease, Immunological Disease, Infectious Disease, Organismal Injury and Abnormalities, Reproductive System Disease
XRCC1	X-ray repair complementing defective repair in Chinese hamster cells 1	Nucleus	other		P18887	x	diagnosis,prognosis	Cancer, Gastrointestinal Disease, Hematological Disease, Hereditary Disorder, Immunological Disease, Inflammatory Disease, Inflammatory Response, Neurological Disease, Organismal Injury and Abnormalities, Psychological Disorders, Reproductive System Disease, Respiratory Disease
XRCC6	X-ray repair complementing defective repair in Chinese hamster cells 6	Nucleus	enzyme		P12956	x	unspecified application	Cancer, Dermatological Diseases and Conditions, Developmental Disorder, Gastrointestinal Disease, Hematological Disease, Hereditary Disorder, Immunological Disease, Inflammatory Disease, Inflammatory Response, Neurological Disease, Nutritional Disease, Organismal Injury and Abnormalities, Psychological Disorders, Reproductive System Disease, Skeletal and Muscular Disorders
YWHAG	tyrosine 3-monooxygenase/tryptophan 5-monooxygenase activation protein, gamma	Cytoplasm	other		P61981	x	unspecified application	Cancer, Gastrointestinal Disease, Hepatic System Disease
YWHAH	tyrosine 3-monooxygenase/tryptophan 5-monooxygenase activation protein, eta	Cytoplasm	transcription regulator		Q04917	x	unspecified application	Cancer, Hereditary Disorder, Neurological Disease, Organismal Injury and Abnormalities, Psychological Disorders, Reproductive System Disease
ZAP70	zeta-chain (TCR) associated protein kinase 70kDa	Plasma Membrane	kinase		P43403	x	prognosis,response to therapy	Cancer, Developmental Disorder, Hematological Disease, Hereditary Disorder, Immunological Disease, Infectious Disease, Inflammatory Response
ZNF185	zinc finger protein 185 (LIM domain)	Nucleus	other		O15231	x	unspecified application	Cancer, Hematological Disease
ZNF215	zinc finger protein 215	Nucleus	transcription regulator		Q9UL58	x	unspecified application	Cancer, Hereditary Disorder, Neurological Disease, Psychological Disorders, Skeletal and Muscular Disorders
ZNF217	zinc finger protein 217	Nucleus	transcription regulator		O75362	x	prognosis	Cancer, Endocrine System Disorders, Gastrointestinal Disease, Organismal Injury and Abnormalities, Reproductive System Disease
ZYX	zyxin	Plasma Membrane	other		Q15942	x	unspecified application	Cancer, Dermatological Diseases and Conditions, Immunological Disease, Infectious Disease, Inflammatory Disease, Inflammatory Response, Organismal Injury and Abnormalities, Renal and Urological Disease, Reproductive System Disease, Respiratory Disease

## Sheet: Ubiquitylation
Symbol	Entrez Gene Name	Location	Family	Drug(s)	GenPept/UniProt/Swiss-Prot Accession	Human	Biomarker Application(s)	Diseases
ABCB1	ATP-binding cassette, sub-family B (MDR/TAP), member 1	Plasma Membrane	transporter	dofequidar, tariquidar, OC 144-093, valspodar	P08183	x	efficacy,prognosis,response to therapy	Auditory Disease, Cancer, Cardiovascular Disease, Connective Tissue Disorders, Gastrointestinal Disease, Hematological Disease, Hepatic System Disease, Hereditary Disorder, Immunological Disease, Infectious Disease, Inflammatory Disease, Inflammatory Response, Neurological Disease, Organismal Injury and Abnormalities, Psychological Disorders, Reproductive System Disease, Respiratory Disease, Skel…
ABCC1	ATP-binding cassette, sub-family C (CFTR/MRP), member 1	Plasma Membrane	transporter	sulfinpyrazone	P33527	x	prognosis	Cancer, Cardiovascular Disease, Connective Tissue Disorders, Dermatological Diseases and Conditions, Developmental Disorder, Gastrointestinal Disease, Hematological Disease, Hepatic System Disease, Hereditary Disorder, Hypersensitivity Response, Immunological Disease, Infectious Disease, Inflammatory Disease, Inflammatory Response, Metabolic Disease, Neurological Disease, Organismal Injury and Ab…
ABCC3	ATP-binding cassette, sub-family C (CFTR/MRP), member 3	Plasma Membrane	transporter		O15438	x	diagnosis,prognosis	Cancer, Developmental Disorder, Endocrine System Disorders, Gastrointestinal Disease, Hematological Disease, Hepatic System Disease, Hereditary Disorder, Immunological Disease, Inflammatory Disease, Metabolic Disease, Neurological Disease, Organismal Injury and Abnormalities
ABCC4	ATP-binding cassette, sub-family C (CFTR/MRP), member 4	Plasma Membrane	transporter		O15439	x	prognosis	Cancer, Cardiovascular Disease, Developmental Disorder, Gastrointestinal Disease, Hepatic System Disease, Immunological Disease, Inflammatory Disease, Inflammatory Response, Nutritional Disease, Organismal Injury and Abnormalities, Reproductive System Disease
ACAT1	acetyl-CoA acetyltransferase 1	Cytoplasm	enzyme		P24752	x	unspecified application	Cancer, Cardiovascular Disease, Developmental Disorder, Hereditary Disorder, Inflammatory Response, Metabolic Disease, Neurological Disease, Organismal Injury and Abnormalities, Psychological Disorders, Renal and Urological Disease, Skeletal and Muscular Disorders
ACLY	ATP citrate lyase	Cytoplasm	enzyme		P53396	x	unspecified application	Cancer, Connective Tissue Disorders, Gastrointestinal Disease, Immunological Disease, Inflammatory Disease, Metabolic Disease, Neurological Disease, Psychological Disorders, Skeletal and Muscular Disorders
ACTA2	actin, alpha 2, smooth muscle, aorta	Cytoplasm	other		P62736	x	efficacy	Cancer, Cardiovascular Disease, Connective Tissue Disorders, Dermatological Diseases and Conditions, Developmental Disorder, Endocrine System Disorders, Gastrointestinal Disease, Hereditary Disorder, Immunological Disease, Inflammatory Disease, Metabolic Disease, Neurological Disease, Ophthalmic Disease, Organismal Injury and Abnormalities, Psychological Disorders, Reproductive System Disease, Re…
ACTG1	actin, gamma 1	Cytoplasm	other		P63261	x	unspecified application	Auditory Disease, Cancer, Developmental Disorder, Gastrointestinal Disease, Hematological Disease, Hepatic System Disease, Hereditary Disorder, Immunological Disease, Neurological Disease, Ophthalmic Disease
ACTN2	actinin, alpha 2	Nucleus	transcription regulator		P35609	x	unspecified application	Cancer, Cardiovascular Disease, Hereditary Disorder, Neurological Disease, Organismal Injury and Abnormalities, Psychological Disorders, Reproductive System Disease, Respiratory Disease, Skeletal and Muscular Disorders
ACTR3	ARP3 actin-related protein 3 homolog (yeast)	Plasma Membrane	other		P61158	x	diagnosis	Cancer, Organismal Injury and Abnormalities, Reproductive System Disease
ADRM1	adhesion regulating molecule 1	Plasma Membrane	other		Q16186	x	unspecified application	Cancer, Organismal Injury and Abnormalities, Reproductive System Disease
AKAP12	A kinase (PRKA) anchor protein 12	Cytoplasm	transporter		Q02952	x	unspecified application	Cancer, Gastrointestinal Disease, Hepatic System Disease, Inflammatory Disease, Inflammatory Response, Neurological Disease, Organismal Injury and Abnormalities, Reproductive System Disease, Respiratory Disease
ALDOA	aldolase A, fructose-bisphosphate	Cytoplasm	enzyme		P04075	x	unspecified application	Cancer, Connective Tissue Disorders, Developmental Disorder, Hematological Disease, Hereditary Disorder, Immunological Disease, Inflammatory Disease, Inflammatory Response, Organismal Injury and Abnormalities, Reproductive System Disease, Respiratory Disease, Skeletal and Muscular Disorders
ANXA1	annexin A1	Plasma Membrane	other	hydrocortisone, hydrocortisone/prednisone, hydrocortisone/mitoxantrone, docetaxel/hydrocortisone	P04083	x	diagnosis,prognosis,unspecified application	Cancer, Cardiovascular Disease, Connective Tissue Disorders, Dermatological Diseases and Conditions, Developmental Disorder, Endocrine System Disorders, Gastrointestinal Disease, Hematological Disease, Hepatic System Disease, Hypersensitivity Response, Immunological Disease, Infectious Disease, Inflammatory Disease, Inflammatory Response, Metabolic Disease, Neurological Disease, Ophthalmic Diseas…
ANXA2	annexin A2	Plasma Membrane	other		P07355	x	diagnosis,unspecified application	Cancer, Cardiovascular Disease, Dermatological Diseases and Conditions, Gastrointestinal Disease, Hematological Disease, Hepatic System Disease, Immunological Disease, Infectious Disease, Inflammatory Response, Neurological Disease, Organismal Injury and Abnormalities, Psychological Disorders, Renal and Urological Disease, Reproductive System Disease, Respiratory Disease, Skeletal and Muscular Di…
ANXA3	annexin A3	Cytoplasm	enzyme		P12429	x	diagnosis,unspecified application	Antimicrobial Response, Cancer, Dermatological Diseases and Conditions, Hematological Disease, Immunological Disease, Inflammatory Disease, Inflammatory Response, Organismal Injury and Abnormalities, Reproductive System Disease, Respiratory Disease
ANXA5	annexin A5	Plasma Membrane	other		P08758	x	diagnosis,efficacy	Cancer, Cardiovascular Disease, Dermatological Diseases and Conditions, Endocrine System Disorders, Gastrointestinal Disease, Hematological Disease, Hereditary Disorder, Immunological Disease, Infectious Disease, Inflammatory Disease, Inflammatory Response, Metabolic Disease, Neurological Disease, Organismal Injury and Abnormalities, Renal and Urological Disease, Reproductive System Disease, Resp…
APP	amyloid beta (A4) precursor protein	Plasma Membrane	other	bapineuzumab, florbetapir F18	P05067	x	diagnosis,efficacy,unspecified application	Cancer, Cardiovascular Disease, Dermatological Diseases and Conditions, Developmental Disorder, Endocrine System Disorders, Gastrointestinal Disease, Hematological Disease, Hepatic System Disease, Hereditary Disorder, Immunological Disease, Infectious Disease, Inflammatory Disease, Inflammatory Response, Metabolic Disease, Neurological Disease, Nutritional Disease, Ophthalmic Disease, Organismal …
AR	androgen receptor	Nucleus	ligand-dependent nuclear receptor	estradiol valerate/testosterone enanthate, estradiol cypionate/testosterone cypionate, BMS-641988, cyproterone acetate/ethinyl estradiol, enzalutamide, 1-testosterone, flutamide/goserelin, drospirenone/ethinyl estradiol, nilutamide, bicalutamide, flutamide, nandrolone decanoate, testosterone cypionate, cyproterone acetate, drospirenone, medroxyprogesterone acetate, oxandrolone, danazol, dihydrote…	P10275	x	diagnosis,disease progression,efficacy	Cancer, Cardiovascular Disease, Connective Tissue Disorders, Dermatological Diseases and Conditions, Developmental Disorder, Endocrine System Disorders, Gastrointestinal Disease, Hematological Disease, Hepatic System Disease, Hereditary Disorder, Immunological Disease, Infectious Disease, Inflammatory Disease, Inflammatory Response, Metabolic Disease, Neurological Disease, Nutritional Disease, Op…
ATP2A1	ATPase, Ca++ transporting, cardiac muscle, fast twitch 1	Cytoplasm	transporter		O14983	x	unspecified application	Cancer, Dermatological Diseases and Conditions, Developmental Disorder, Gastrointestinal Disease, Hematological Disease, Hereditary Disorder, Metabolic Disease, Neurological Disease, Nutritional Disease, Organismal Injury and Abnormalities, Psychological Disorders, Reproductive System Disease, Respiratory Disease, Skeletal and Muscular Disorders
ATP6V1B2	ATPase, H+ transporting, lysosomal 56/58kDa, V1 subunit B2	Cytoplasm	transporter	gallium nitrate	P21281	x	unspecified application	Cancer, Endocrine System Disorders, Hematological Disease, Hereditary Disorder, Immunological Disease, Infectious Disease, Neurological Disease, Psychological Disorders, Skeletal and Muscular Disorders
BCAR1	breast cancer anti-estrogen resistance 1	Plasma Membrane	enzyme		P56945	x	prognosis	Cancer, Cardiovascular Disease, Developmental Disorder, Infectious Disease, Inflammatory Response, Organismal Injury and Abnormalities, Reproductive System Disease
BRCA1	breast cancer 1, early onset	Nucleus	transcription regulator		P38398	x	diagnosis,efficacy,response to therapy	Cancer, Connective Tissue Disorders, Dermatological Diseases and Conditions, Developmental Disorder, Endocrine System Disorders, Gastrointestinal Disease, Hematological Disease, Hepatic System Disease, Hereditary Disorder, Immunological Disease, Infectious Disease, Metabolic Disease, Neurological Disease, Organismal Injury and Abnormalities, Psychological Disorders, Renal and Urological Disease, …
BRCA2	breast cancer 2, early onset	Nucleus	transcription regulator		P51587	x	diagnosis,efficacy,response to therapy	Cancer, Cardiovascular Disease, Connective Tissue Disorders, Dermatological Diseases and Conditions, Developmental Disorder, Endocrine System Disorders, Gastrointestinal Disease, Hematological Disease, Hepatic System Disease, Hereditary Disorder, Immunological Disease, Infectious Disease, Metabolic Disease, Neurological Disease, Organismal Injury and Abnormalities, Renal and Urological Disease, R…
BSG	basigin (Ok blood group)	Plasma Membrane	transporter		P35613	x	disease progression,prognosis,response to therapy	Cancer, Connective Tissue Disorders, Gastrointestinal Disease, Hematological Disease, Hepatic System Disease, Immunological Disease, Infectious Disease, Inflammatory Disease, Inflammatory Response, Organismal Injury and Abnormalities, Renal and Urological Disease, Reproductive System Disease, Respiratory Disease, Skeletal and Muscular Disorders
CA2	carbonic anhydrase II	Cytoplasm	enzyme	ethoxyzolamide, dichlorphenamide, phentermine/topiramate, brimonidine/brinzolamide, methazolamide, diazoxide, hydrochlorothiazide, acetazolamide, trichloromethiazide, dorzolamide, chlorothiazide, dorzolamide/timolol, brinzolamide, chlorothiazide/reserpine, quinethazone, chlorthalidone, benzthiazide, sulfacetamide, topiramate	P00918	x	diagnosis,unspecified application	Cancer, Cardiovascular Disease, Connective Tissue Disorders, Developmental Disorder, Endocrine System Disorders, Gastrointestinal Disease, Hematological Disease, Hepatic System Disease, Hereditary Disorder, Immunological Disease, Infectious Disease, Inflammatory Disease, Inflammatory Response, Metabolic Disease, Neurological Disease, Nutritional Disease, Ophthalmic Disease, Organismal Injury and …
CASP8	caspase 8, apoptosis-related cysteine peptidase	Nucleus	peptidase		Q14790	x	diagnosis,efficacy,prognosis	Cancer, Cardiovascular Disease, Connective Tissue Disorders, Endocrine System Disorders, Gastrointestinal Disease, Hematological Disease, Hepatic System Disease, Hereditary Disorder, Immunological Disease, Infectious Disease, Inflammatory Disease, Inflammatory Response, Metabolic Disease, Neurological Disease, Organismal Injury and Abnormalities, Psychological Disorders, Reproductive System Disea…
CD47	CD47 molecule	Plasma Membrane	transmembrane receptor		Q08722	x	unspecified application	Cancer, Cardiovascular Disease, Dermatological Diseases and Conditions, Developmental Disorder, Gastrointestinal Disease, Hematological Disease, Hereditary Disorder, Hypersensitivity Response, Immunological Disease, Infectious Disease, Inflammatory Disease, Inflammatory Response, Metabolic Disease, Neurological Disease, Organismal Injury and Abnormalities, Respiratory Disease, Skeletal and Muscul…
CDH1	cadherin 1, type 1, E-cadherin (epithelial)	Plasma Membrane	other		P12830	x	diagnosis,disease progression,efficacy,prognosis	Cancer, Connective Tissue Disorders, Dermatological Diseases and Conditions, Developmental Disorder, Endocrine System Disorders, Gastrointestinal Disease, Hepatic System Disease, Hereditary Disorder, Immunological Disease, Inflammatory Disease, Inflammatory Response, Organismal Injury and Abnormalities, Renal and Urological Disease, Reproductive System Disease, Respiratory Disease, Skeletal and M…
CDK4	cyclin-dependent kinase 4	Nucleus	kinase	palbociclib, LEE011, alvocidib	P11802	x	diagnosis	Cancer, Cardiovascular Disease, Connective Tissue Disorders, Dermatological Diseases and Conditions, Developmental Disorder, Endocrine System Disorders, Gastrointestinal Disease, Hematological Disease, Hepatic System Disease, Immunological Disease, Infectious Disease, Inflammatory Response, Metabolic Disease, Neurological Disease, Organismal Injury and Abnormalities, Psychological Disorders, Rena…
CKB	creatine kinase, brain	Cytoplasm	kinase		P12277	x	safety	Cancer, Developmental Disorder, Hereditary Disorder, Inflammatory Response, Neurological Disease, Organismal Injury and Abnormalities, Psychological Disorders, Reproductive System Disease, Respiratory Disease, Skeletal and Muscular Disorders
CSF1R	colony stimulating factor 1 receptor	Plasma Membrane	kinase	nilotinib, sunitinib, pazopanib	P07333	x	prognosis	Auditory Disease, Cancer, Cardiovascular Disease, Connective Tissue Disorders, Developmental Disorder, Endocrine System Disorders, Gastrointestinal Disease, Hematological Disease, Hepatic System Disease, Hereditary Disorder, Immunological Disease, Inflammatory Disease, Inflammatory Response, Neurological Disease, Nutritional Disease, Organismal Injury and Abnormalities, Psychological Disorders, R…
CTNNB1	catenin (cadherin-associated protein), beta 1, 88kDa	Nucleus	transcription regulator		P35222	x	diagnosis,disease progression,efficacy,prognosis	Cancer, Cardiovascular Disease, Connective Tissue Disorders, Dermatological Diseases and Conditions, Developmental Disorder, Endocrine System Disorders, Gastrointestinal Disease, Hematological Disease, Hepatic System Disease, Hereditary Disorder, Immunological Disease, Infectious Disease, Inflammatory Disease, Metabolic Disease, Neurological Disease, Organismal Injury and Abnormalities, Psycholog…
CTSD	cathepsin D	Cytoplasm	peptidase		P07339	x	diagnosis,unspecified application	Cancer, Cardiovascular Disease, Developmental Disorder, Endocrine System Disorders, Gastrointestinal Disease, Hematological Disease, Hepatic System Disease, Hereditary Disorder, Immunological Disease, Inflammatory Disease, Inflammatory Response, Metabolic Disease, Neurological Disease, Ophthalmic Disease, Organismal Injury and Abnormalities, Psychological Disorders, Reproductive System Disease, R…
CTTN	cortactin	Plasma Membrane	other		Q14247	x	efficacy	Cancer, Gastrointestinal Disease, Hepatic System Disease, Inflammatory Response
CYP3A4	cytochrome P450, family 3, subfamily A, polypeptide 4	Cytoplasm	enzyme	cobicistat, cobicistat/elvitegravir/emtricitabine/tenofovir disoproxil, ketoconazole	P08684	x	diagnosis,efficacy,safety	Cancer, Dermatological Diseases and Conditions, Gastrointestinal Disease, Hematological Disease, Infectious Disease, Inflammatory Disease, Inflammatory Response, Metabolic Disease, Neurological Disease, Organismal Injury and Abnormalities, Psychological Disorders, Renal and Urological Disease, Reproductive System Disease, Respiratory Disease, Skeletal and Muscular Disorders
EGFR	epidermal growth factor receptor	Plasma Membrane	kinase	cetuximab, AEE 788, panitumumab, BMS-599626, varlitinib, XL647, bevacizumab/erlotinib, afatinib, sapitinib, cetuximab/irinotecan, lapatinib/pazopanib, irinotecan/panitumumab, erlotinib/vismodegib, erlotinib/gemcitabine, lapatinib/letrozole, bevacizumab/panitumumab, bevacizumab/cetuximab, capecitabine/erlotinib, lapatinib/paclitaxel, canertinib, gefitinib, neratinib, PD 153035, lapatinib, vandetan…	P00533	x	diagnosis,disease progression,efficacy,prognosis,response to therapy,safety,unspecified application	Antimicrobial Response, Cancer, Cardiovascular Disease, Connective Tissue Disorders, Dermatological Diseases and Conditions, Developmental Disorder, Endocrine System Disorders, Gastrointestinal Disease, Hematological Disease, Hepatic System Disease, Hereditary Disorder, Immunological Disease, Infectious Disease, Inflammatory Disease, Inflammatory Response, Neurological Disease, Nutritional Diseas…
EIF2S1	eukaryotic translation initiation factor 2, subunit 1 alpha, 35kDa	Cytoplasm	translation regulator		P05198	x	efficacy	Cancer, Dermatological Diseases and Conditions, Hereditary Disorder, Infectious Disease, Metabolic Disease, Neurological Disease, Organismal Injury and Abnormalities, Psychological Disorders, Reproductive System Disease
ENO1	enolase 1, (alpha)	Cytoplasm	enzyme		P06733	x	diagnosis	Cancer, Connective Tissue Disorders, Dermatological Diseases and Conditions, Endocrine System Disorders, Gastrointestinal Disease, Hematological Disease, Immunological Disease, Inflammatory Disease, Inflammatory Response, Organismal Injury and Abnormalities, Reproductive System Disease, Respiratory Disease, Skeletal and Muscular Disorders
ERCC2	excision repair cross-complementing rodent repair deficiency, complementation group 2	Nucleus	enzyme		P18074	x	diagnosis,efficacy,prognosis,safety	Cancer, Connective Tissue Disorders, Dermatological Diseases and Conditions, Developmental Disorder, Gastrointestinal Disease, Hematological Disease, Hereditary Disorder, Inflammatory Disease, Neurological Disease, Nutritional Disease, Organismal Injury and Abnormalities, Psychological Disorders, Reproductive System Disease, Respiratory Disease, Skeletal and Muscular Disorders
EZH2	enhancer of zeste homolog 2 (Drosophila)	Nucleus	transcription regulator		Q15910	x	diagnosis,disease progression,efficacy	Cancer, Dermatological Diseases and Conditions, Developmental Disorder, Gastrointestinal Disease, Hematological Disease, Hepatic System Disease, Hereditary Disorder, Immunological Disease, Infectious Disease, Neurological Disease, Organismal Injury and Abnormalities, Renal and Urological Disease, Reproductive System Disease, Respiratory Disease
EZR	ezrin	Plasma Membrane	other		P15311	x	prognosis	Cancer, Gastrointestinal Disease, Neurological Disease, Organismal Injury and Abnormalities, Renal and Urological Disease, Reproductive System Disease, Respiratory Disease
F11R	F11 receptor	Plasma Membrane	other		Q9Y624	x	unspecified application	Cancer, Connective Tissue Disorders, Gastrointestinal Disease, Hematological Disease, Hereditary Disorder, Immunological Disease, Infectious Disease, Inflammatory Disease, Inflammatory Response, Neurological Disease, Organismal Injury and Abnormalities, Psychological Disorders, Reproductive System Disease, Skeletal and Muscular Disorders
FASN	fatty acid synthase	Cytoplasm	enzyme	orlistat, cerulenin	P49327	x	diagnosis,efficacy	Cancer, Cardiovascular Disease, Connective Tissue Disorders, Dermatological Diseases and Conditions, Endocrine System Disorders, Gastrointestinal Disease, Hematological Disease, Hepatic System Disease, Immunological Disease, Infectious Disease, Inflammatory Disease, Metabolic Disease, Neurological Disease, Nutritional Disease, Organismal Injury and Abnormalities, Psychological Disorders, Reproduc…
FDFT1	farnesyl-diphosphate farnesyltransferase 1	Cytoplasm	enzyme	lapaquistat, zoledronic acid	P37268	x	unspecified application	Cancer, Cardiovascular Disease, Connective Tissue Disorders, Developmental Disorder, Endocrine System Disorders, Gastrointestinal Disease, Hematological Disease, Hepatic System Disease, Hereditary Disorder, Immunological Disease, Inflammatory Disease, Metabolic Disease, Neurological Disease, Organismal Injury and Abnormalities, Psychological Disorders, Renal and Urological Disease, Reproductive S…
FLNA	filamin A, alpha	Cytoplasm	other		P21333	x	unspecified application	Cancer, Cardiovascular Disease, Connective Tissue Disorders, Dermatological Diseases and Conditions, Developmental Disorder, Gastrointestinal Disease, Hematological Disease, Hereditary Disorder, Immunological Disease, Infectious Disease, Inflammatory Disease, Inflammatory Response, Metabolic Disease, Neurological Disease, Organismal Injury and Abnormalities, Reproductive System Disease, Respirato…
FLNB	filamin B, beta	Cytoplasm	other		O75369	x	unspecified application	Cancer, Connective Tissue Disorders, Developmental Disorder, Gastrointestinal Disease, Hereditary Disorder, Organismal Injury and Abnormalities, Reproductive System Disease, Skeletal and Muscular Disorders
FLT3	fms-related tyrosine kinase 3	Plasma Membrane	kinase	sunitinib, dovitinib, tandutinib, cabozantinib, ponatinib, bortezomib/sorafenib, dexamethasone/lenalidomide/sorafenib, bevacizumab/sorafenib, sorafenib, lestaurtinib, midostaurin	P36888	x	efficacy,prognosis	Cancer, Cardiovascular Disease, Connective Tissue Disorders, Endocrine System Disorders, Gastrointestinal Disease, Hematological Disease, Hepatic System Disease, Immunological Disease, Inflammatory Disease, Inflammatory Response, Organismal Injury and Abnormalities, Renal and Urological Disease, Reproductive System Disease, Respiratory Disease, Skeletal and Muscular Disorders
FN1	fibronectin 1	Extracellular Space	enzyme		P02751	x	diagnosis,efficacy,prognosis,unspecified application	Cancer, Cardiovascular Disease, Connective Tissue Disorders, Dermatological Diseases and Conditions, Developmental Disorder, Endocrine System Disorders, Gastrointestinal Disease, Hematological Disease, Hepatic System Disease, Hereditary Disorder, Hypersensitivity Response, Immunological Disease, Infectious Disease, Inflammatory Disease, Inflammatory Response, Metabolic Disease, Neurological Disea…
GAPDH	glyceraldehyde-3-phosphate dehydrogenase	Cytoplasm	enzyme		P04406	x	diagnosis,unspecified application	Cancer, Dermatological Diseases and Conditions, Endocrine System Disorders, Hematological Disease, Hereditary Disorder, Immunological Disease, Infectious Disease, Inflammatory Disease, Inflammatory Response, Metabolic Disease, Neurological Disease, Organismal Injury and Abnormalities, Psychological Disorders, Reproductive System Disease, Respiratory Disease, Skeletal and Muscular Disorders
GJB2	gap junction protein, beta 2, 26kDa	Plasma Membrane	transporter		P29033	x	disease progression	Auditory Disease, Cancer, Dermatological Diseases and Conditions, Developmental Disorder, Gastrointestinal Disease, Hepatic System Disease, Hereditary Disorder, Inflammatory Response, Neurological Disease, Organismal Injury and Abnormalities, Renal and Urological Disease, Reproductive System Disease, Skeletal and Muscular Disorders
GLI3	GLI family zinc finger 3	Nucleus	transcription regulator		P10071	x	efficacy	Cancer, Connective Tissue Disorders, Developmental Disorder, Endocrine System Disorders, Gastrointestinal Disease, Hereditary Disorder, Neurological Disease, Organismal Injury and Abnormalities, Renal and Urological Disease, Reproductive System Disease, Respiratory Disease, Skeletal and Muscular Disorders
GNAS	GNAS complex locus	Plasma Membrane	enzyme		P63092	x	unspecified application	Cancer, Cardiovascular Disease, Connective Tissue Disorders, Developmental Disorder, Endocrine System Disorders, Gastrointestinal Disease, Hematological Disease, Hepatic System Disease, Hereditary Disorder, Inflammatory Response, Metabolic Disease, Neurological Disease, Organismal Injury and Abnormalities, Psychological Disorders, Renal and Urological Disease, Reproductive System Disease, Skeleta…
GPI	glucose-6-phosphate isomerase	Extracellular Space	enzyme		P06744	x	unspecified application	Cancer, Connective Tissue Disorders, Developmental Disorder, Endocrine System Disorders, Gastrointestinal Disease, Hematological Disease, Hereditary Disorder, Infectious Disease, Inflammatory Disease, Inflammatory Response, Neurological Disease, Organismal Injury and Abnormalities, Psychological Disorders, Reproductive System Disease, Respiratory Disease, Skeletal and Muscular Disorders
GSTM3	glutathione S-transferase mu 3 (brain)	Cytoplasm	enzyme		P21266	x	diagnosis,prognosis	Auditory Disease, Cancer, Connective Tissue Disorders, Organismal Injury and Abnormalities, Reproductive System Disease, Skeletal and Muscular Disorders
HADHA	hydroxyacyl-CoA dehydrogenase/3-ketoacyl-CoA thiolase/enoyl-CoA hydratase (trifunctional protein), alpha subunit	Cytoplasm	enzyme		P40939	x	unspecified application	Cancer, Developmental Disorder, Endocrine System Disorders, Gastrointestinal Disease, Hematological Disease, Hepatic System Disease, Hereditary Disorder, Metabolic Disease, Neurological Disease
HLA-A	major histocompatibility complex, class I, A	Plasma Membrane	other		P04439	x	efficacy,response to therapy	Cancer, Connective Tissue Disorders, Dermatological Diseases and Conditions, Developmental Disorder, Endocrine System Disorders, Gastrointestinal Disease, Hematological Disease, Hereditary Disorder, Immunological Disease, Inflammatory Disease, Inflammatory Response, Metabolic Disease, Ophthalmic Disease, Organismal Injury and Abnormalities, Renal and Urological Disease, Reproductive System Diseas…
HLA-B	major histocompatibility complex, class I, B	Plasma Membrane	transmembrane receptor		P01889	x	safety	Antimicrobial Response, Cancer, Cardiovascular Disease, Connective Tissue Disorders, Dermatological Diseases and Conditions, Endocrine System Disorders, Gastrointestinal Disease, Hematological Disease, Hepatic System Disease, Immunological Disease, Infectious Disease, Inflammatory Disease, Inflammatory Response, Metabolic Disease, Neurological Disease, Organismal Injury and Abnormalities, Psychol…
HLA-C	major histocompatibility complex, class I, C	Plasma Membrane	other		P10321	x	response to therapy	Cancer, Connective Tissue Disorders, Dermatological Diseases and Conditions, Developmental Disorder, Endocrine System Disorders, Gastrointestinal Disease, Hereditary Disorder, Immunological Disease, Infectious Disease, Inflammatory Disease, Inflammatory Response, Metabolic Disease, Organismal Injury and Abnormalities, Reproductive System Disease, Respiratory Disease, Skeletal and Muscular Disorde…
HLA-E	major histocompatibility complex, class I, E	Plasma Membrane	transmembrane receptor		P13747	x	prognosis	Cancer, Connective Tissue Disorders, Dermatological Diseases and Conditions, Gastrointestinal Disease, Hepatic System Disease, Immunological Disease, Infectious Disease, Inflammatory Disease, Inflammatory Response, Metabolic Disease, Neurological Disease, Skeletal and Muscular Disorders
HLTF	helicase-like transcription factor	Nucleus	transcription regulator		Q14527	x	diagnosis	Cancer, Connective Tissue Disorders, Endocrine System Disorders, Gastrointestinal Disease, Inflammatory Disease, Organismal Injury and Abnormalities, Reproductive System Disease, Skeletal and Muscular Disorders
HMGB2	high mobility group box 2	Nucleus	transcription regulator		P26583	x	unspecified application	Cancer, Gastrointestinal Disease, Hereditary Disorder, Neurological Disease, Psychological Disorders, Skeletal and Muscular Disorders
HMGCR	3-hydroxy-3-methylglutaryl-CoA reductase	Cytoplasm	enzyme	aspirin/pravastatin, ezetimibe/fluvastatin, atorvastatin/niacin, atorvastatin/ezetimibe, ezetimibe/rosuvastatin, simvastatin/sitagliptin, choline fenofibrate/simvastatin, pitavastatin, lovastatin/niacin, ezetimibe/simvastatin, amlodipine/atorvastatin, fluvastatin, cerivastatin, atorvastatin, pravastatin, simvastatin, lovastatin, mevastatin, rosuvastatin	P04035	x	efficacy	Cancer, Cardiovascular Disease, Connective Tissue Disorders, Dermatological Diseases and Conditions, Developmental Disorder, Endocrine System Disorders, Gastrointestinal Disease, Hematological Disease, Hepatic System Disease, Hereditary Disorder, Immunological Disease, Infectious Disease, Inflammatory Disease, Inflammatory Response, Metabolic Disease, Neurological Disease, Nutritional Disease, Op…
HMGN1	high mobility group nucleosome binding domain 1	Nucleus	transcription regulator		P05114	x	unspecified application	Hereditary Disorder, Neurological Disease, Psychological Disorders, Skeletal and Muscular Disorders
HMOX1	heme oxygenase (decycling) 1	Cytoplasm	enzyme	tin mesoporphyrin	P09601	x	efficacy,safety,unspecified application	Cancer, Cardiovascular Disease, Connective Tissue Disorders, Dermatological Diseases and Conditions, Developmental Disorder, Gastrointestinal Disease, Hematological Disease, Hepatic System Disease, Hereditary Disorder, Hypersensitivity Response, Immunological Disease, Infectious Disease, Inflammatory Disease, Inflammatory Response, Metabolic Disease, Neurological Disease, Nutritional Disease, Org…
HNRNPH1	heterogeneous nuclear ribonucleoprotein H1 (H)	Nucleus	other		P31943	x	diagnosis	Cancer, Gastrointestinal Disease, Infectious Disease, Organismal Injury and Abnormalities, Renal and Urological Disease, Reproductive System Disease
HNRNPK	heterogeneous nuclear ribonucleoprotein K	Nucleus	other		P61978	x	prognosis	Cancer, Gastrointestinal Disease, Hepatic System Disease, Infectious Disease, Inflammatory Disease, Organismal Injury and Abnormalities, Renal and Urological Disease, Reproductive System Disease
HNRNPU	heterogeneous nuclear ribonucleoprotein U (scaffold attachment factor A)	Nucleus	transporter		Q00839	x	unspecified application	Cancer, Cardiovascular Disease, Connective Tissue Disorders, Developmental Disorder, Endocrine System Disorders, Hereditary Disorder, Infectious Disease, Metabolic Disease, Neurological Disease, Organismal Injury and Abnormalities, Psychological Disorders, Reproductive System Disease, Skeletal and Muscular Disorders
HSPA4	heat shock 70kDa protein 4	Cytoplasm	other		P34932	x	efficacy	Cancer, Cardiovascular Disease, Inflammatory Response, Organismal Injury and Abnormalities, Reproductive System Disease
HSPA5	heat shock 70kDa protein 5 (glucose-regulated protein, 78kDa)	Cytoplasm	enzyme		P11021	x	unspecified application	Cancer, Connective Tissue Disorders, Dermatological Diseases and Conditions, Developmental Disorder, Gastrointestinal Disease, Hematological Disease, Hepatic System Disease, Hereditary Disorder, Immunological Disease, Infectious Disease, Inflammatory Disease, Inflammatory Response, Metabolic Disease, Neurological Disease, Organismal Injury and Abnormalities, Psychological Disorders, Renal and Uro…
HSPA8	heat shock 70kDa protein 8	Cytoplasm	enzyme		P11142	x	diagnosis	Antimicrobial Response, Cancer, Connective Tissue Disorders, Dermatological Diseases and Conditions, Gastrointestinal Disease, Hepatic System Disease, Hereditary Disorder, Immunological Disease, Inflammatory Disease, Inflammatory Response, Neurological Disease, Psychological Disorders, Skeletal and Muscular Disorders
HSPD1	heat shock 60kDa protein 1 (chaperonin)	Cytoplasm	enzyme		P10809	x	diagnosis,prognosis	Cancer, Connective Tissue Disorders, Hematological Disease, Hereditary Disorder, Immunological Disease, Infectious Disease, Inflammatory Disease, Inflammatory Response, Metabolic Disease, Neurological Disease, Ophthalmic Disease, Organismal Injury and Abnormalities, Psychological Disorders, Reproductive System Disease, Respiratory Disease, Skeletal and Muscular Disorders
HUWE1	HECT, UBA and WWE domain containing 1, E3 ubiquitin protein ligase	Nucleus	transcription regulator		Q7Z6Z7	x	unspecified application	Cancer, Cardiovascular Disease, Dermatological Diseases and Conditions, Developmental Disorder, Endocrine System Disorders, Gastrointestinal Disease, Hematological Disease, Hepatic System Disease, Hereditary Disorder, Immunological Disease, Infectious Disease, Metabolic Disease, Neurological Disease, Organismal Injury and Abnormalities, Psychological Disorders, Reproductive System Disease, Respir…
IGF2BP3	insulin-like growth factor 2 mRNA binding protein 3	Cytoplasm	translation regulator		O00425	x	diagnosis	Cancer, Endocrine System Disorders, Organismal Injury and Abnormalities, Renal and Urological Disease, Reproductive System Disease
IL4R	interleukin 4 receptor	Plasma Membrane	transmembrane receptor		P24394	x	response to therapy,unspecified application	Cancer, Connective Tissue Disorders, Dermatological Diseases and Conditions, Developmental Disorder, Gastrointestinal Disease, Hematological Disease, Hepatic System Disease, Hereditary Disorder, Hypersensitivity Response, Immunological Disease, Infectious Disease, Inflammatory Disease, Inflammatory Response, Metabolic Disease, Nutritional Disease, Ophthalmic Disease, Organismal Injury and Abnorma…
INSR	insulin receptor	Plasma Membrane	kinase	insulin detemir, INS, insulin aspart/insulin detemir, insulin glargine/insulin lispro, insulin aspart, insulin glulisine, insulin lispro, insulin glargine, protamine zinc insulin	P06213	x	prognosis	Cancer, Cardiovascular Disease, Connective Tissue Disorders, Dermatological Diseases and Conditions, Developmental Disorder, Endocrine System Disorders, Gastrointestinal Disease, Hematological Disease, Hepatic System Disease, Hereditary Disorder, Immunological Disease, Infectious Disease, Inflammatory Disease, Inflammatory Response, Metabolic Disease, Neurological Disease, Nutritional Disease, Or…
IRF4	interferon regulatory factor 4	Nucleus	transcription regulator		Q15306	x	efficacy	Cancer, Developmental Disorder, Hematological Disease, Immunological Disease, Infectious Disease, Inflammatory Disease, Inflammatory Response, Neurological Disease, Organismal Injury and Abnormalities, Renal and Urological Disease
ITGB1	integrin, beta 1 (fibronectin receptor, beta polypeptide, antigen CD29 includes MDF2, MSK12)	Plasma Membrane	transmembrane receptor		P05556	x	disease progression,prognosis	Cancer, Cardiovascular Disease, Connective Tissue Disorders, Dermatological Diseases and Conditions, Developmental Disorder, Gastrointestinal Disease, Hematological Disease, Hereditary Disorder, Hypersensitivity Response, Immunological Disease, Infectious Disease, Inflammatory Response, Neurological Disease, Nutritional Disease, Organismal Injury and Abnormalities, Renal and Urological Disease, R…
ITGB4	integrin, beta 4	Plasma Membrane	transmembrane receptor		P16144	x	diagnosis	Cancer, Connective Tissue Disorders, Dermatological Diseases and Conditions, Developmental Disorder, Endocrine System Disorders, Gastrointestinal Disease, Hereditary Disorder, Neurological Disease, Organismal Injury and Abnormalities, Psychological Disorders, Renal and Urological Disease, Reproductive System Disease, Respiratory Disease, Skeletal and Muscular Disorders
JUP	junction plakoglobin	Plasma Membrane	other		P14923	x	diagnosis,unspecified application	Cancer, Cardiovascular Disease, Dermatological Diseases and Conditions, Developmental Disorder, Gastrointestinal Disease, Hematological Disease, Immunological Disease, Inflammatory Disease, Inflammatory Response, Organismal Injury and Abnormalities, Renal and Urological Disease, Reproductive System Disease
KHSRP	KH-type splicing regulatory protein	Nucleus	enzyme		Q92945	x	unspecified application	Cancer, Connective Tissue Disorders, Immunological Disease, Infectious Disease, Inflammatory Disease, Neurological Disease, Organismal Injury and Abnormalities, Renal and Urological Disease, Reproductive System Disease, Skeletal and Muscular Disorders
KPNA2	karyopherin alpha 2 (RAG cohort 1, importin alpha 1)	Nucleus	transporter		P52292	x	diagnosis	Cancer, Dermatological Diseases and Conditions, Endocrine System Disorders, Gastrointestinal Disease, Hematological Disease, Immunological Disease, Neurological Disease, Organismal Injury and Abnormalities, Reproductive System Disease
KRAS	Kirsten rat sarcoma viral oncogene homolog	Cytoplasm	enzyme		P01116	x	diagnosis,efficacy,prognosis,response to therapy,unspecified application	Cancer, Cardiovascular Disease, Connective Tissue Disorders, Dermatological Diseases and Conditions, Developmental Disorder, Endocrine System Disorders, Gastrointestinal Disease, Hematological Disease, Hepatic System Disease, Hereditary Disorder, Immunological Disease, Inflammatory Disease, Inflammatory Response, Neurological Disease, Organismal Injury and Abnormalities, Psychological Disorders, …
KRT5	keratin 5	Cytoplasm	other		P13647	x	diagnosis,efficacy,unspecified application	Cancer, Connective Tissue Disorders, Dermatological Diseases and Conditions, Developmental Disorder, Hereditary Disorder, Immunological Disease, Inflammatory Disease, Inflammatory Response, Organismal Injury and Abnormalities, Reproductive System Disease, Respiratory Disease
KRT8	keratin 8	Cytoplasm	other		P05787	x	prognosis	Cancer, Dermatological Diseases and Conditions, Developmental Disorder, Endocrine System Disorders, Gastrointestinal Disease, Hematological Disease, Hepatic System Disease, Hereditary Disorder, Infectious Disease, Inflammatory Disease, Inflammatory Response, Metabolic Disease, Organismal Injury and Abnormalities, Reproductive System Disease, Respiratory Disease, Skeletal and Muscular Disorders
KRT17	keratin 17	Cytoplasm	other		Q04695	x	diagnosis,efficacy	Cancer, Dermatological Diseases and Conditions, Developmental Disorder, Hereditary Disorder, Immunological Disease, Inflammatory Disease, Inflammatory Response, Neurological Disease, Organismal Injury and Abnormalities, Psychological Disorders, Reproductive System Disease, Skeletal and Muscular Disorders
KRT19	keratin 19	Cytoplasm	other		P08727	x	diagnosis,disease progression,prognosis,unspecified application	Cancer, Developmental Disorder, Endocrine System Disorders, Gastrointestinal Disease, Hereditary Disorder, Organismal Injury and Abnormalities, Renal and Urological Disease, Reproductive System Disease, Respiratory Disease
LAP3	leucine aminopeptidase 3	Cytoplasm	peptidase		P28838	x	safety	Cancer, Connective Tissue Disorders, Dermatological Diseases and Conditions, Immunological Disease, Inflammatory Disease, Organismal Injury and Abnormalities, Reproductive System Disease, Skeletal and Muscular Disorders
LDHA	lactate dehydrogenase A	Cytoplasm	enzyme		P00338	x	efficacy,unspecified application	Cancer, Developmental Disorder, Endocrine System Disorders, Gastrointestinal Disease, Hematological Disease, Hereditary Disorder, Immunological Disease, Metabolic Disease, Neurological Disease, Organismal Injury and Abnormalities, Psychological Disorders, Reproductive System Disease, Respiratory Disease, Skeletal and Muscular Disorders
LDHB	lactate dehydrogenase B	Cytoplasm	enzyme		P07195	x	unspecified application	Connective Tissue Disorders, Developmental Disorder, Hereditary Disorder, Immunological Disease, Inflammatory Disease, Metabolic Disease, Neurological Disease, Psychological Disorders, Skeletal and Muscular Disorders
LEPR	leptin receptor	Plasma Membrane	transmembrane receptor		P48357	x	prognosis	Cancer, Cardiovascular Disease, Connective Tissue Disorders, Dermatological Diseases and Conditions, Developmental Disorder, Endocrine System Disorders, Gastrointestinal Disease, Hematological Disease, Hepatic System Disease, Hereditary Disorder, Immunological Disease, Inflammatory Disease, Inflammatory Response, Metabolic Disease, Neurological Disease, Nutritional Disease, Organismal Injury and …
LIFR	leukemia inhibitory factor receptor alpha	Plasma Membrane	transmembrane receptor		P42702	x	diagnosis	Cancer, Endocrine System Disorders, Gastrointestinal Disease, Hereditary Disorder, Infectious Disease, Neurological Disease, Organismal Injury and Abnormalities, Psychological Disorders, Reproductive System Disease, Skeletal and Muscular Disorders
MAP4	microtubule-associated protein 4	Cytoplasm	other		P27816	x	efficacy	Cancer, Infectious Disease, Organismal Injury and Abnormalities, Renal and Urological Disease, Reproductive System Disease, Respiratory Disease
MAPK1	mitogen-activated protein kinase 1	Cytoplasm	kinase	ARRY-438162	P28482	x	efficacy	Cancer, Cardiovascular Disease, Dermatological Diseases and Conditions, Developmental Disorder, Hypersensitivity Response, Infectious Disease, Inflammatory Response, Neurological Disease, Organismal Injury and Abnormalities, Renal and Urological Disease, Skeletal and Muscular Disorders
MCAM	melanoma cell adhesion molecule	Plasma Membrane	other		P43121	x	diagnosis,prognosis	Cancer, Dermatological Diseases and Conditions, Endocrine System Disorders, Gastrointestinal Disease, Hematological Disease, Immunological Disease, Infectious Disease, Inflammatory Disease, Inflammatory Response, Neurological Disease, Organismal Injury and Abnormalities, Reproductive System Disease, Skeletal and Muscular Disorders
MCL1	myeloid cell leukemia sequence 1 (BCL2-related)	Cytoplasm	transporter		Q07820	x	efficacy,prognosis	Cancer, Cardiovascular Disease, Connective Tissue Disorders, Dermatological Diseases and Conditions, Hematological Disease, Immunological Disease, Inflammatory Disease, Inflammatory Response, Neurological Disease, Organismal Injury and Abnormalities, Reproductive System Disease, Skeletal and Muscular Disorders
MCM4	minichromosome maintenance complex component 4	Nucleus	enzyme		P33991	x	disease progression	Cancer, Endocrine System Disorders, Gastrointestinal Disease, Hematological Disease, Hereditary Disorder, Immunological Disease, Organismal Injury and Abnormalities, Reproductive System Disease
MCM7	minichromosome maintenance complex component 7	Nucleus	enzyme		P33993	x	diagnosis,disease progression	Cancer, Endocrine System Disorders, Organismal Injury and Abnormalities, Reproductive System Disease
MED21	mediator complex subunit 21	Nucleus	transcription regulator		Q13503	x	unspecified application	Cardiovascular Disease, Hereditary Disorder, Neurological Disease, Psychological Disorders, Skeletal and Muscular Disorders
MET	met proto-oncogene	Plasma Membrane	kinase	crizotinib, tivantinib, cabozantinib, INC280	P08581	x	diagnosis,disease progression,efficacy,prognosis,response to therapy,unspecified application	Cancer, Cardiovascular Disease, Developmental Disorder, Endocrine System Disorders, Gastrointestinal Disease, Hepatic System Disease, Hypersensitivity Response, Inflammatory Response, Metabolic Disease, Neurological Disease, Nutritional Disease, Organismal Injury and Abnormalities, Renal and Urological Disease, Reproductive System Disease, Respiratory Disease, Skeletal and Muscular Disorders
METAP2	methionyl aminopeptidase 2	Cytoplasm	peptidase	beloranib, PPI-2458	P50579	x	unspecified application	Cancer, Dermatological Diseases and Conditions, Organismal Injury and Abnormalities, Reproductive System Disease
MGMT	O-6-methylguanine-DNA methyltransferase	Nucleus	enzyme	O6-benzylguanine	P16455	x	diagnosis,efficacy,prognosis	Cancer, Endocrine System Disorders, Gastrointestinal Disease, Hematological Disease, Hepatic System Disease, Immunological Disease, Neurological Disease, Organismal Injury and Abnormalities, Renal and Urological Disease, Reproductive System Disease, Respiratory Disease
MIB1	mindbomb E3 ubiquitin protein ligase 1	Cytoplasm	other		Q86YT6	x	diagnosis,efficacy	Cancer, Cardiovascular Disease, Connective Tissue Disorders, Developmental Disorder, Gastrointestinal Disease, Hematological Disease, Immunological Disease, Inflammatory Disease, Inflammatory Response, Neurological Disease, Organismal Injury and Abnormalities, Reproductive System Disease
MLF1	myeloid leukemia factor 1	Nucleus	other		P58340	x	unspecified application	Cancer, Dermatological Diseases and Conditions, Gastrointestinal Disease, Hematological Disease, Hereditary Disorder, Neurological Disease, Psychological Disorders, Skeletal and Muscular Disorders
MSH2	mutS homolog 2	Nucleus	enzyme		P43246	x	diagnosis,prognosis	Cancer, Connective Tissue Disorders, Dermatological Diseases and Conditions, Developmental Disorder, Endocrine System Disorders, Gastrointestinal Disease, Hematological Disease, Hereditary Disorder, Immunological Disease, Infectious Disease, Inflammatory Response, Neurological Disease, Organismal Injury and Abnormalities, Psychological Disorders, Reproductive System Disease, Respiratory Disease, …
MSH6	mutS homolog 6	Nucleus	enzyme		P52701	x	diagnosis	Cancer, Dermatological Diseases and Conditions, Endocrine System Disorders, Gastrointestinal Disease, Hematological Disease, Hereditary Disorder, Immunological Disease, Organismal Injury and Abnormalities, Reproductive System Disease, Respiratory Disease
MYC	v-myc avian myelocytomatosis viral oncogene homolog	Nucleus	transcription regulator		P01106	x	diagnosis,efficacy,prognosis,response to therapy,unspecified application	Cancer, Cardiovascular Disease, Connective Tissue Disorders, Dermatological Diseases and Conditions, Developmental Disorder, Endocrine System Disorders, Gastrointestinal Disease, Hematological Disease, Hepatic System Disease, Hereditary Disorder, Immunological Disease, Infectious Disease, Inflammatory Disease, Inflammatory Response, Metabolic Disease, Neurological Disease, Nutritional Disease, Or…
MYH9	myosin, heavy chain 9, non-muscle	Cytoplasm	transporter		P35579	x	unspecified application	Auditory Disease, Cancer, Cardiovascular Disease, Connective Tissue Disorders, Developmental Disorder, Gastrointestinal Disease, Hematological Disease, Hereditary Disorder, Immunological Disease, Inflammatory Disease, Inflammatory Response, Neurological Disease, Organismal Injury and Abnormalities, Psychological Disorders, Renal and Urological Disease, Reproductive System Disease, Respiratory Dis…
MYH10	myosin, heavy chain 10, non-muscle	Cytoplasm	other		P35580	x	unspecified application	Cancer, Cardiovascular Disease, Connective Tissue Disorders, Developmental Disorder, Hematological Disease, Hereditary Disorder, Immunological Disease, Inflammatory Disease, Inflammatory Response, Neurological Disease, Organismal Injury and Abnormalities, Renal and Urological Disease, Reproductive System Disease
NAP1L4	nucleosome assembly protein 1-like 4	Other	other		Q99733	x	unspecified application	Cancer, Organismal Injury and Abnormalities, Reproductive System Disease
NME1	NME/NM23 nucleoside diphosphate kinase 1	Cytoplasm	kinase		P15531	x	unspecified application	Cancer, Gastrointestinal Disease, Hematological Disease, Hepatic System Disease, Hereditary Disorder, Immunological Disease, Neurological Disease, Organismal Injury and Abnormalities, Psychological Disorders, Reproductive System Disease, Skeletal and Muscular Disorders
NPM1	nucleophosmin (nucleolar phosphoprotein B23, numatrin)	Nucleus	transcription regulator		P06748	x	disease progression,unspecified application	Cancer, Gastrointestinal Disease, Hematological Disease, Hepatic System Disease, Hereditary Disorder, Immunological Disease, Inflammatory Response, Neurological Disease, Organismal Injury and Abnormalities, Psychological Disorders, Renal and Urological Disease, Skeletal and Muscular Disorders
NT5C	5', 3'-nucleotidase, cytosolic	Cytoplasm	phosphatase		Q8TCD5	x	efficacy	Cancer
PARP1	poly (ADP-ribose) polymerase 1	Nucleus	enzyme	veliparib, olaparib, INO-1001	P09874	x	diagnosis,efficacy,prognosis	Auditory Disease, Cancer, Cardiovascular Disease, Connective Tissue Disorders, Dermatological Diseases and Conditions, Developmental Disorder, Endocrine System Disorders, Gastrointestinal Disease, Hematological Disease, Hepatic System Disease, Hereditary Disorder, Immunological Disease, Infectious Disease, Inflammatory Disease, Inflammatory Response, Metabolic Disease, Neurological Disease, Nutri…
PDCD4	programmed cell death 4 (neoplastic transformation inhibitor)	Nucleus	other		Q53EL6	x	prognosis	Cancer, Cardiovascular Disease, Dermatological Diseases and Conditions, Endocrine System Disorders, Gastrointestinal Disease, Hematological Disease, Immunological Disease, Inflammatory Disease, Inflammatory Response, Metabolic Disease, Neurological Disease, Organismal Injury and Abnormalities, Skeletal and Muscular Disorders
PFN1	profilin 1	Cytoplasm	other		P07737	x	unspecified application	Cancer, Cardiovascular Disease, Dermatological Diseases and Conditions, Developmental Disorder, Gastrointestinal Disease, Hepatic System Disease, Hereditary Disorder, Immunological Disease, Inflammatory Disease, Inflammatory Response, Neurological Disease, Organismal Injury and Abnormalities, Psychological Disorders, Reproductive System Disease, Skeletal and Muscular Disorders
PKM	pyruvate kinase, muscle	Cytoplasm	kinase		P14618	x	unspecified application	Cancer, Dermatological Diseases and Conditions, Endocrine System Disorders, Gastrointestinal Disease, Hepatic System Disease, Hereditary Disorder, Immunological Disease, Inflammatory Disease, Neurological Disease, Organismal Injury and Abnormalities, Psychological Disorders, Reproductive System Disease, Respiratory Disease, Skeletal and Muscular Disorders
PLK1	polo-like kinase 1	Nucleus	kinase	BI 2536, volasertib	P53350	x	unspecified application	Cancer, Gastrointestinal Disease, Hepatic System Disease, Infectious Disease, Organismal Injury and Abnormalities, Renal and Urological Disease, Reproductive System Disease, Respiratory Disease
PRDX1	peroxiredoxin 1	Cytoplasm	enzyme		Q06830	x	diagnosis	Cancer, Connective Tissue Disorders, Endocrine System Disorders, Gastrointestinal Disease, Hematological Disease, Hepatic System Disease, Immunological Disease, Infectious Disease, Inflammatory Disease, Inflammatory Response, Metabolic Disease, Neurological Disease, Organismal Injury and Abnormalities, Psychological Disorders, Reproductive System Disease, Respiratory Disease, Skeletal and Muscula…
PRDX3	peroxiredoxin 3	Cytoplasm	enzyme		P30048	x	diagnosis	Cancer, Cardiovascular Disease, Developmental Disorder, Gastrointestinal Disease, Hematological Disease, Hepatic System Disease, Hereditary Disorder, Immunological Disease, Organismal Injury and Abnormalities, Skeletal and Muscular Disorders
PSMA2	proteasome (prosome, macropain) subunit, alpha type, 2	Cytoplasm	peptidase		P25787	x	unspecified application	Cancer, Cardiovascular Disease, Developmental Disorder, Hematological Disease, Hereditary Disorder, Immunological Disease, Infectious Disease, Inflammatory Disease, Neurological Disease, Organismal Injury and Abnormalities, Renal and Urological Disease, Skeletal and Muscular Disorders
PSMD4	proteasome (prosome, macropain) 26S subunit, non-ATPase, 4	Cytoplasm	other		P55036	x	diagnosis,disease progression	Cancer, Gastrointestinal Disease, Hepatic System Disease, Infectious Disease, Inflammatory Response, Organismal Injury and Abnormalities, Reproductive System Disease
PTCH1	patched 1	Plasma Membrane	transmembrane receptor		Q13635	x	efficacy	Cancer, Cardiovascular Disease, Connective Tissue Disorders, Dermatological Diseases and Conditions, Developmental Disorder, Endocrine System Disorders, Gastrointestinal Disease, Hepatic System Disease, Hereditary Disorder, Inflammatory Disease, Neurological Disease, Organismal Injury and Abnormalities, Reproductive System Disease, Skeletal and Muscular Disorders
PTEN	phosphatase and tensin homolog	Cytoplasm	phosphatase		P60484	x	diagnosis,disease progression,efficacy,prognosis,response to therapy	Cancer, Cardiovascular Disease, Connective Tissue Disorders, Dermatological Diseases and Conditions, Developmental Disorder, Endocrine System Disorders, Gastrointestinal Disease, Hematological Disease, Hepatic System Disease, Hereditary Disorder, Hypersensitivity Response, Immunological Disease, Infectious Disease, Inflammatory Disease, Inflammatory Response, Metabolic Disease, Neurological Disea…
RAB11A	RAB11A, member RAS oncogene family	Cytoplasm	enzyme		P62491	x	unspecified application	Hereditary Disorder, Infectious Disease, Neurological Disease, Psychological Disorders, Skeletal and Muscular Disorders
RPL6	ribosomal protein L6	Cytoplasm	other		Q02878	x	unspecified application	Cancer, Hematological Disease, Organismal Injury and Abnormalities, Renal and Urological Disease, Reproductive System Disease
RPS3	ribosomal protein S3	Cytoplasm	enzyme		P23396	x	unspecified application	Cancer, Connective Tissue Disorders, Immunological Disease, Inflammatory Disease, Organismal Injury and Abnormalities, Reproductive System Disease, Skeletal and Muscular Disorders
RPS4X	ribosomal protein S4, X-linked	Cytoplasm	other		P62701	x	diagnosis	Cancer, Gastrointestinal Disease, Hematological Disease, Hepatic System Disease, Neurological Disease, Organismal Injury and Abnormalities, Psychological Disorders, Reproductive System Disease, Skeletal and Muscular Disorders
RRM1	ribonucleotide reductase M1	Nucleus	enzyme	cytarabine/fludarabine phosphate, gemcitabine/vismodegib, bortezomib/cladribine/rituximab, gemcitabine/paclitaxel, erlotinib/gemcitabine, cyclophosphamide/fludarabine phosphate/rituximab, cladribine/cytarabine/daunorubicin, gemcitabine/oxaliplatin, gemcitabine/vinorelbine, docetaxel/gemcitabine, docetaxel/gemcitabine/vincristine, cladribine/cytarabine/filgrastim, clofarabine/cyclophosphamide/etop…	P23921	x	efficacy,response to therapy	Cancer, Connective Tissue Disorders, Dermatological Diseases and Conditions, Developmental Disorder, Endocrine System Disorders, Gastrointestinal Disease, Hematological Disease, Hepatic System Disease, Hereditary Disorder, Immunological Disease, Infectious Disease, Inflammatory Disease, Inflammatory Response, Neurological Disease, Organismal Injury and Abnormalities, Renal and Urological Disease,…
RRM2B	ribonucleotide reductase M2 B (TP53 inducible)	Nucleus	enzyme	bortezomib/cladribine/rituximab, cladribine/cytarabine/daunorubicin, cladribine/cytarabine/filgrastim, cladribine/cytarabine/filgrastim/mitoxantrone, cladribine/rituximab, cladribine/cytarabine/filgrastim/idarubicin, cladribine/cytarabine/filgrastim/idarubicin/plerixafor, triapine, hydroxyurea, cladribine	Q7LG56	x	efficacy	Cancer, Cardiovascular Disease, Developmental Disorder, Gastrointestinal Disease, Hematological Disease, Hereditary Disorder, Immunological Disease, Infectious Disease, Inflammatory Disease, Metabolic Disease, Neurological Disease, Ophthalmic Disease, Organismal Injury and Abnormalities, Renal and Urological Disease, Respiratory Disease, Skeletal and Muscular Disorders
SCD	stearoyl-CoA desaturase (delta-9-desaturase)	Cytoplasm	enzyme		O00767	x	diagnosis	Cancer, Cardiovascular Disease, Connective Tissue Disorders, Dermatological Diseases and Conditions, Developmental Disorder, Endocrine System Disorders, Gastrointestinal Disease, Hematological Disease, Hepatic System Disease, Hereditary Disorder, Immunological Disease, Inflammatory Disease, Inflammatory Response, Metabolic Disease, Neurological Disease, Nutritional Disease, Organismal Injury and …
SDC1	syndecan 1	Plasma Membrane	enzyme		P18827	x	efficacy	Auditory Disease, Cancer, Cardiovascular Disease, Connective Tissue Disorders, Dermatological Diseases and Conditions, Gastrointestinal Disease, Hematological Disease, Hereditary Disorder, Immunological Disease, Infectious Disease, Inflammatory Disease, Inflammatory Response, Metabolic Disease, Neurological Disease, Nutritional Disease, Organismal Injury and Abnormalities, Psychological Disorders…
SFN	stratifin	Cytoplasm	other		P31947	x	prognosis	Cancer, Dermatological Diseases and Conditions, Gastrointestinal Disease, Infectious Disease, Inflammatory Disease, Inflammatory Response
SLC29A1	solute carrier family 29 (equilibrative nucleoside transporter), member 1	Plasma Membrane	transporter		Q99808	x	efficacy,response to therapy	Cancer, Inflammatory Response, Psychological Disorders
SMAD4	SMAD family member 4	Nucleus	transcription regulator		Q13485	x	prognosis	Auditory Disease, Cancer, Cardiovascular Disease, Connective Tissue Disorders, Dental Disease, Dermatological Diseases and Conditions, Developmental Disorder, Endocrine System Disorders, Gastrointestinal Disease, Hematological Disease, Hepatic System Disease, Hereditary Disorder, Inflammatory Disease, Inflammatory Response, Neurological Disease, Ophthalmic Disease, Organismal Injury and Abnormali…
SND1	staphylococcal nuclease and tudor domain containing 1	Nucleus	enzyme		Q7KZF4	x	unspecified application	Cancer, Connective Tissue Disorders, Hereditary Disorder, Immunological Disease, Inflammatory Disease, Neurological Disease, Organismal Injury and Abnormalities, Psychological Disorders, Reproductive System Disease, Respiratory Disease, Skeletal and Muscular Disorders
SOAT1	sterol O-acyltransferase 1	Cytoplasm	enzyme	pactimibe, ezetimibe/fluvastatin, ezetimibe/rosuvastatin, ezetimibe/fenofibrate, ezetimibe/simvastatin, ezetimibe, hesperetin	P35610	x	unspecified application	Cancer, Cardiovascular Disease, Dermatological Diseases and Conditions, Developmental Disorder, Endocrine System Disorders, Gastrointestinal Disease, Hereditary Disorder, Inflammatory Disease, Inflammatory Response, Metabolic Disease, Neurological Disease, Ophthalmic Disease, Organismal Injury and Abnormalities, Psychological Disorders, Renal and Urological Disease
STAT1	signal transducer and activator of transcription 1, 91kDa	Nucleus	transcription regulator		P42224	x	diagnosis,efficacy,prognosis,response to therapy	Antimicrobial Response, Cancer, Cardiovascular Disease, Connective Tissue Disorders, Dermatological Diseases and Conditions, Developmental Disorder, Endocrine System Disorders, Gastrointestinal Disease, Hematological Disease, Hepatic System Disease, Hereditary Disorder, Immunological Disease, Infectious Disease, Inflammatory Disease, Inflammatory Response, Metabolic Disease, Neurological Disease,…
STMN1	stathmin 1	Cytoplasm	other		P16949	x	efficacy	Cancer, Hematological Disease, Immunological Disease, Inflammatory Disease, Neurological Disease, Organismal Injury and Abnormalities, Psychological Disorders, Renal and Urological Disease, Respiratory Disease, Skeletal and Muscular Disorders
TARDBP	TAR DNA binding protein	Nucleus	transcription regulator		Q13148	x	unspecified application	Cancer, Gastrointestinal Disease, Hereditary Disorder, Neurological Disease, Organismal Injury and Abnormalities, Psychological Disorders, Reproductive System Disease, Skeletal and Muscular Disorders
TERF2	telomeric repeat binding factor 2	Nucleus	other		Q15554	x	diagnosis,disease progression	Cancer, Dermatological Diseases and Conditions, Infectious Disease, Inflammatory Response, Neurological Disease, Organismal Injury and Abnormalities, Reproductive System Disease
TFRC	transferrin receptor	Plasma Membrane	transporter		P02786	x	diagnosis,efficacy	Cancer, Cardiovascular Disease, Connective Tissue Disorders, Developmental Disorder, Gastrointestinal Disease, Hematological Disease, Immunological Disease, Infectious Disease, Inflammatory Disease, Neurological Disease, Organismal Injury and Abnormalities, Renal and Urological Disease, Reproductive System Disease, Respiratory Disease, Skeletal and Muscular Disorders
TNFRSF10A	tumor necrosis factor receptor superfamily, member 10a	Plasma Membrane	transmembrane receptor	trm-1	O00220	x	diagnosis	Cancer, Connective Tissue Disorders, Dermatological Diseases and Conditions, Gastrointestinal Disease, Hematological Disease, Hepatic System Disease, Immunological Disease, Infectious Disease, Inflammatory Disease, Inflammatory Response, Organismal Injury and Abnormalities, Renal and Urological Disease, Reproductive System Disease, Skeletal and Muscular Disorders
TNS4	tensin 4	Cytoplasm	other		Q8IZW8	x	unspecified application	Cancer, Dermatological Diseases and Conditions, Endocrine System Disorders, Gastrointestinal Disease, Organismal Injury and Abnormalities, Reproductive System Disease, Respiratory Disease
TOP1	topoisomerase (DNA) I	Nucleus	enzyme	elsamitrucin, T 0128, polyglutamate camptothecin, BN 80927, tafluposide, cetuximab/irinotecan, capecitabine/irinotecan, 5-fluorouracil/irinotecan, cisplatin/topotecan, cyclophosphamide/topotecan, cyclophosphamide/topotecan/vincristine, irinotecan/temozolomide, irinotecan/vincristine, cyclophosphamide/irinotecan/temozolomide, irinotecan/temozolomide/vincristine, bevacizumab/irinotecan, bevacizumab…	P11387	x	efficacy	Cancer, Connective Tissue Disorders, Dermatological Diseases and Conditions, Endocrine System Disorders, Gastrointestinal Disease, Hematological Disease, Hereditary Disorder, Immunological Disease, Inflammatory Disease, Neurological Disease, Organismal Injury and Abnormalities, Psychological Disorders, Reproductive System Disease, Respiratory Disease, Skeletal and Muscular Disorders
TOP2A	topoisomerase (DNA) II alpha 170kDa	Nucleus	enzyme	novobiocin, etoposide, teniposide, CPI-0004Na, becatecarin, elsamitrucin, AQ4N, BN 80927, tafluposide, fleroxacin, cyclophosphamide/epirubicin/5-fluorouracil, cytarabine/daunorubicin, hydrocortisone/mitoxantrone, mitoxantrone/prednisone, cladribine/cytarabine/daunorubicin, cytarabine/daunorubicin/tretinoin, cytarabine/idarubicin, idarubicin/mitoxantrone/tretinoin, arsenic trioxide/daunorubicin/tr…	P11388	x	diagnosis,efficacy,prognosis,response to therapy	Auditory Disease, Cancer, Cardiovascular Disease, Dermatological Diseases and Conditions, Endocrine System Disorders, Gastrointestinal Disease, Hematological Disease, Hepatic System Disease, Hereditary Disorder, Immunological Disease, Infectious Disease, Inflammatory Disease, Inflammatory Response, Neurological Disease, Nutritional Disease, Ophthalmic Disease, Organismal Injury and Abnormalities,…
TP53	tumor protein p53	Nucleus	transcription regulator		P04637	x	diagnosis,disease progression,efficacy,prognosis,response to therapy,unspecified application	Antimicrobial Response, Cancer, Cardiovascular Disease, Connective Tissue Disorders, Dermatological Diseases and Conditions, Developmental Disorder, Endocrine System Disorders, Gastrointestinal Disease, Hematological Disease, Hepatic System Disease, Hereditary Disorder, Immunological Disease, Infectious Disease, Inflammatory Disease, Inflammatory Response, Metabolic Disease, Neurological Disease,…
TPD52	tumor protein D52	Cytoplasm	other		P55327	x	diagnosis,unspecified application	Cancer, Endocrine System Disorders, Gastrointestinal Disease, Hepatic System Disease, Hereditary Disorder, Neurological Disease, Organismal Injury and Abnormalities, Psychological Disorders, Reproductive System Disease, Skeletal and Muscular Disorders
TPI1	triosephosphate isomerase 1	Cytoplasm	enzyme		P60174	x	diagnosis,unspecified application	Cancer, Cardiovascular Disease, Dermatological Diseases and Conditions, Gastrointestinal Disease, Hematological Disease, Hepatic System Disease, Hereditary Disorder, Immunological Disease, Inflammatory Disease, Inflammatory Response, Metabolic Disease, Neurological Disease, Organismal Injury and Abnormalities, Psychological Disorders, Reproductive System Disease, Respiratory Disease, Skeletal and…
TPM3	tropomyosin 3	Cytoplasm	other		P06753	x	diagnosis,unspecified application	Cancer, Dermatological Diseases and Conditions, Developmental Disorder, Hereditary Disorder, Immunological Disease, Inflammatory Disease, Inflammatory Response, Neurological Disease, Organismal Injury and Abnormalities, Psychological Disorders, Reproductive System Disease, Skeletal and Muscular Disorders
TUBA1A	tubulin, alpha 1a	Cytoplasm	other	epothilone B, colchicine/probenecid, larotaxel, eribulin, davunetide, vintafolide, milataxel, cevipabulin, gemcitabine/paclitaxel, docetaxel/prednisone, cyclophosphamide/prednisone/vincristine, docetaxel/hydrocortisone, cyclophosphamide/docetaxel, gemcitabine/vinorelbine, cyclophosphamide/daunorubicin/imatinib/prednisone/vincristine, cyclophosphamide/topotecan/vincristine, docetaxel/gemcitabine, …	Q71U36	x	unspecified application	Cancer, Cardiovascular Disease, Connective Tissue Disorders, Dermatological Diseases and Conditions, Developmental Disorder, Endocrine System Disorders, Gastrointestinal Disease, Hematological Disease, Hereditary Disorder, Immunological Disease, Infectious Disease, Inflammatory Disease, Inflammatory Response, Metabolic Disease, Neurological Disease, Ophthalmic Disease, Organismal Injury and Abnor…
TUBB	tubulin, beta class I	Cytoplasm	other	ixabepilone, colchicine/probenecid, brentuximab vedotin, cabazitaxel, 6-mercaptopurine/methotrexate/prednisone/vincristine, dexamethasone/doxorubicin/vincristine, gemcitabine/vinorelbine, docetaxel/gemcitabine/vincristine, irinotecan/vincristine, trastuzumab/vinorelbine, methotrexate/vinorelbine, vinorelbine, vincristine, podophyllotoxin, colchicine	P07437	x	efficacy	Cancer, Cardiovascular Disease, Connective Tissue Disorders, Dermatological Diseases and Conditions, Developmental Disorder, Endocrine System Disorders, Gastrointestinal Disease, Hematological Disease, Hereditary Disorder, Immunological Disease, Infectious Disease, Inflammatory Disease, Inflammatory Response, Metabolic Disease, Neurological Disease, Ophthalmic Disease, Organismal Injury and Abnor…
TUBB4B	tubulin, beta 4B class IVb	Cytoplasm	other	epothilone B, colchicine/probenecid, larotaxel, ABT-751, eribulin, simotaxel, davunetide, vintafolide, milataxel, cevipabulin, brentuximab vedotin, cabazitaxel, gemcitabine/paclitaxel, docetaxel/prednisone, cyclophosphamide/prednisone/vincristine, docetaxel/hydrocortisone, cyclophosphamide/docetaxel, gemcitabine/vinorelbine, cyclophosphamide/daunorubicin/imatinib/prednisone/vincristine, cyclophos…	P68371	x	unspecified application	Cancer, Cardiovascular Disease, Connective Tissue Disorders, Dermatological Diseases and Conditions, Developmental Disorder, Endocrine System Disorders, Gastrointestinal Disease, Hematological Disease, Hepatic System Disease, Hereditary Disorder, Immunological Disease, Infectious Disease, Inflammatory Disease, Inflammatory Response, Metabolic Disease, Neurological Disease, Ophthalmic Disease, Org…
TXN	thioredoxin	Cytoplasm	enzyme		P10599	x	efficacy,unspecified application	Cancer, Cardiovascular Disease, Connective Tissue Disorders, Dermatological Diseases and Conditions, Developmental Disorder, Endocrine System Disorders, Gastrointestinal Disease, Hepatic System Disease, Hereditary Disorder, Hypersensitivity Response, Immunological Disease, Infectious Disease, Inflammatory Disease, Inflammatory Response, Metabolic Disease, Neurological Disease, Nutritional Disease…
TYMS	thymidylate synthetase	Nucleus	enzyme	flucytosine, 5-fluorouracil, trimethoprim, cyclophosphamide/epirubicin/5-fluorouracil, pralatrexate, 5-fluorouracil/oxaliplatin, capecitabine/irinotecan, 5-fluorouracil/irinotecan, capecitabine/docetaxel, capecitabine/lapatinib, capecitabine/ixabepilone, bevacizumab/5-fluorouracil, bevacizumab/capecitabine/oxaliplatin, cyclophosphamide/docetaxel/epirubicin/5-fluorouracil/trastuzumab, capecitabine…	P04818	x	diagnosis,disease progression,efficacy,prognosis,response to therapy	Cancer, Connective Tissue Disorders, Dermatological Diseases and Conditions, Developmental Disorder, Endocrine System Disorders, Gastrointestinal Disease, Hematological Disease, Hepatic System Disease, Hereditary Disorder, Immunological Disease, Infectious Disease, Inflammatory Disease, Inflammatory Response, Neurological Disease, Ophthalmic Disease, Organismal Injury and Abnormalities, Renal and…
UBAC1	UBA domain containing 1	Nucleus	other		Q9BSL1	x	unspecified application	Cancer, Connective Tissue Disorders, Hereditary Disorder, Immunological Disease, Inflammatory Disease, Neurological Disease, Psychological Disorders, Skeletal and Muscular Disorders
UCHL1	ubiquitin carboxyl-terminal esterase L1 (ubiquitin thiolesterase)	Cytoplasm	peptidase		P09936	x	diagnosis,prognosis	Cancer, Endocrine System Disorders, Gastrointestinal Disease, Hepatic System Disease, Hereditary Disorder, Immunological Disease, Inflammatory Disease, Metabolic Disease, Neurological Disease, Organismal Injury and Abnormalities, Psychological Disorders, Renal and Urological Disease, Reproductive System Disease, Skeletal and Muscular Disorders
USP13	ubiquitin specific peptidase 13 (isopeptidase T-3)	Other	peptidase		Q92995	x	unspecified application	Cancer, Gastrointestinal Disease, Hereditary Disorder, Infectious Disease, Neurological Disease, Psychological Disorders, Skeletal and Muscular Disorders
VCL	vinculin	Plasma Membrane	enzyme		P18206	x	unspecified application	Cancer, Cardiovascular Disease, Connective Tissue Disorders, Dermatological Diseases and Conditions, Developmental Disorder, Hereditary Disorder, Immunological Disease, Inflammatory Disease, Inflammatory Response, Organismal Injury and Abnormalities, Reproductive System Disease, Skeletal and Muscular Disorders
VHL	von Hippel-Lindau tumor suppressor, E3 ubiquitin protein ligase	Nucleus	transcription regulator		P40337	x	diagnosis,efficacy	Cancer, Cardiovascular Disease, Connective Tissue Disorders, Dermatological Diseases and Conditions, Developmental Disorder, Gastrointestinal Disease, Hematological Disease, Hepatic System Disease, Hereditary Disorder, Immunological Disease, Inflammatory Disease, Inflammatory Response, Neurological Disease, Organismal Injury and Abnormalities, Renal and Urological Disease, Reproductive System Dis…
VWF	von Willebrand factor	Extracellular Space	other		P04275	x	diagnosis,efficacy,prognosis	Cancer, Cardiovascular Disease, Dermatological Diseases and Conditions, Endocrine System Disorders, Gastrointestinal Disease, Hematological Disease, Hereditary Disorder, Immunological Disease, Infectious Disease, Inflammatory Disease, Inflammatory Response, Metabolic Disease, Neurological Disease, Ophthalmic Disease, Organismal Injury and Abnormalities, Renal and Urological Disease, Reproductive …
XIAP	X-linked inhibitor of apoptosis	Cytoplasm	enzyme		P98170	x	diagnosis,efficacy	Cancer, Cardiovascular Disease, Connective Tissue Disorders, Gastrointestinal Disease, Hematological Disease, Hepatic System Disease, Hereditary Disorder, Immunological Disease, Infectious Disease, Inflammatory Disease, Inflammatory Response, Metabolic Disease, Neurological Disease, Organismal Injury and Abnormalities, Psychological Disorders, Renal and Urological Disease, Reproductive System Dis…
XPC	xeroderma pigmentosum, complementation group C	Nucleus	other		Q01831	x	diagnosis	Cancer, Dermatological Diseases and Conditions, Developmental Disorder, Gastrointestinal Disease, Hepatic System Disease, Hereditary Disorder, Neurological Disease, Nutritional Disease, Organismal Injury and Abnormalities, Renal and Urological Disease, Reproductive System Disease, Respiratory Disease
XRCC5	X-ray repair complementing defective repair in Chinese hamster cells 5 (double-strand-break rejoining)	Nucleus	enzyme		P13010	x	unspecified application	Cancer, Connective Tissue Disorders, Developmental Disorder, Gastrointestinal Disease, Hematological Disease, Hereditary Disorder, Immunological Disease, Inflammatory Response, Neurological Disease, Organismal Injury and Abnormalities, Reproductive System Disease, Respiratory Disease, Skeletal and Muscular Disorders
XRCC6	X-ray repair complementing defective repair in Chinese hamster cells 6	Nucleus	enzyme		P12956	x	unspecified application	Cancer, Dermatological Diseases and Conditions, Developmental Disorder, Gastrointestinal Disease, Hematological Disease, Hereditary Disorder, Immunological Disease, Inflammatory Disease, Inflammatory Response, Neurological Disease, Nutritional Disease, Organismal Injury and Abnormalities, Psychological Disorders, Reproductive System Disease, Skeletal and Muscular Disorders
YWHAE	tyrosine 3-monooxygenase/tryptophan 5-monooxygenase activation protein, epsilon	Cytoplasm	other		P62258	x	diagnosis	Cancer, Cardiovascular Disease, Dermatological Diseases and Conditions, Developmental Disorder, Gastrointestinal Disease, Hematological Disease, Hereditary Disorder, Immunological Disease, Neurological Disease, Organismal Injury and Abnormalities, Psychological Disorders, Reproductive System Disease, Respiratory Disease
YWHAH	tyrosine 3-monooxygenase/tryptophan 5-monooxygenase activation protein, eta	Cytoplasm	transcription regulator		Q04917	x	unspecified application	Cancer, Hereditary Disorder, Neurological Disease, Organismal Injury and Abnormalities, Psychological Disorders, Reproductive System Disease
ZNF671	zinc finger protein 671	Nucleus	other		Q8TAW3	x	unspecified application	Cancer, Inflammatory Response, Respiratory Disease
ZYX	zyxin	Plasma Membrane	other		Q15942	x	unspecified application	Cancer, Dermatological Diseases and Conditions, Immunological Disease, Infectious Disease, Inflammatory Disease, Inflammatory Response, Organismal Injury and Abnormalities, Renal and Urological Disease, Reproductive System Disease, Respiratory Disease

## Sheet: Acetylation
Symbol	Entrez Gene Name	Location	Family	Drug(s)	GenPept/UniProt/Swiss-Prot Accession	Human	Biomarker Application(s)	Diseases
ACAA2	acetyl-CoA acyltransferase 2	Cytoplasm	enzyme		P42765	x	unspecified application	Cancer, Developmental Disorder, Gastrointestinal Disease, Hereditary Disorder, Organismal Injury and Abnormalities, Renal and Urological Disease
ACAT1	acetyl-CoA acetyltransferase 1	Cytoplasm	enzyme		P24752	x	unspecified application	Cancer, Cardiovascular Disease, Developmental Disorder, Hereditary Disorder, Inflammatory Response, Metabolic Disease, Neurological Disease, Organismal Injury and Abnormalities, Psychological Disorders, Renal and Urological Disease, Skeletal and Muscular Disorders
ACTA2	actin, alpha 2, smooth muscle, aorta	Cytoplasm	other		P62736	x	efficacy	Cancer, Cardiovascular Disease, Connective Tissue Disorders, Dermatological Diseases and Conditions, Developmental Disorder, Endocrine System Disorders, Gastrointestinal Disease, Hereditary Disorder, Immunological Disease, Inflammatory Disease, Metabolic Disease, Neurological Disease, Ophthalmic Disease, Organismal Injury and Abnormalities, Psychological Disorders, Reproductive System Disease, Re…
ACTG1	actin, gamma 1	Cytoplasm	other		P63261	x	unspecified application	Auditory Disease, Cancer, Developmental Disorder, Gastrointestinal Disease, Hematological Disease, Hepatic System Disease, Hereditary Disorder, Immunological Disease, Neurological Disease, Ophthalmic Disease
ACTR3	ARP3 actin-related protein 3 homolog (yeast)	Plasma Membrane	other		P61158	x	diagnosis	Cancer, Organismal Injury and Abnormalities, Reproductive System Disease
AKR1B10	aldo-keto reductase family 1, member B10 (aldose reductase)	Cytoplasm	enzyme		O60218	x	unspecified application	Cancer, Dermatological Diseases and Conditions, Gastrointestinal Disease, Hepatic System Disease, Inflammatory Disease, Respiratory Disease
ALDH1A1	aldehyde dehydrogenase 1 family, member A1	Cytoplasm	enzyme	disulfiram, chlorpropamide	P00352	x	diagnosis,disease progression	Cancer, Connective Tissue Disorders, Developmental Disorder, Endocrine System Disorders, Gastrointestinal Disease, Hematological Disease, Hepatic System Disease, Immunological Disease, Inflammatory Disease, Metabolic Disease, Neurological Disease, Ophthalmic Disease, Organismal Injury and Abnormalities, Psychological Disorders, Renal and Urological Disease, Reproductive System Disease, Respirator…
ALDOA	aldolase A, fructose-bisphosphate	Cytoplasm	enzyme		P04075	x	unspecified application	Cancer, Connective Tissue Disorders, Developmental Disorder, Hematological Disease, Hereditary Disorder, Immunological Disease, Inflammatory Disease, Inflammatory Response, Organismal Injury and Abnormalities, Reproductive System Disease, Respiratory Disease, Skeletal and Muscular Disorders
ANXA5	annexin A5	Plasma Membrane	other		P08758	x	diagnosis,efficacy	Cancer, Cardiovascular Disease, Dermatological Diseases and Conditions, Endocrine System Disorders, Gastrointestinal Disease, Hematological Disease, Hereditary Disorder, Immunological Disease, Infectious Disease, Inflammatory Disease, Inflammatory Response, Metabolic Disease, Neurological Disease, Organismal Injury and Abnormalities, Renal and Urological Disease, Reproductive System Disease, Resp…
AR	androgen receptor	Nucleus	ligand-dependent nuclear receptor	estradiol valerate/testosterone enanthate, estradiol cypionate/testosterone cypionate, BMS-641988, cyproterone acetate/ethinyl estradiol, enzalutamide, 1-testosterone, flutamide/goserelin, drospirenone/ethinyl estradiol, nilutamide, bicalutamide, flutamide, nandrolone decanoate, testosterone cypionate, cyproterone acetate, drospirenone, medroxyprogesterone acetate, oxandrolone, danazol, dihydrote…	P10275	x	diagnosis,disease progression,efficacy	Cancer, Cardiovascular Disease, Connective Tissue Disorders, Dermatological Diseases and Conditions, Developmental Disorder, Endocrine System Disorders, Gastrointestinal Disease, Hematological Disease, Hepatic System Disease, Hereditary Disorder, Immunological Disease, Infectious Disease, Inflammatory Disease, Inflammatory Response, Metabolic Disease, Neurological Disease, Nutritional Disease, Op…
ARHGDIA	Rho GDP dissociation inhibitor (GDI) alpha	Cytoplasm	other		P52565	x	unspecified application	Cancer, Cardiovascular Disease, Dermatological Diseases and Conditions, Developmental Disorder, Endocrine System Disorders, Gastrointestinal Disease, Hematological Disease, Hereditary Disorder, Hypersensitivity Response, Immunological Disease, Inflammatory Disease, Inflammatory Response, Metabolic Disease, Organismal Injury and Abnormalities, Renal and Urological Disease, Reproductive System Dise…
BIRC5	baculoviral IAP repeat containing 5	Cytoplasm	other		O15392	x	diagnosis,disease progression,efficacy,prognosis,response to therapy	Cancer, Cardiovascular Disease, Connective Tissue Disorders, Dermatological Diseases and Conditions, Developmental Disorder, Endocrine System Disorders, Gastrointestinal Disease, Hematological Disease, Hepatic System Disease, Hereditary Disorder, Immunological Disease, Inflammatory Disease, Inflammatory Response, Neurological Disease, Organismal Injury and Abnormalities, Renal and Urological Dise…
BRCA2	breast cancer 2, early onset	Nucleus	transcription regulator		P51587	x	diagnosis,efficacy,response to therapy	Cancer, Cardiovascular Disease, Connective Tissue Disorders, Dermatological Diseases and Conditions, Developmental Disorder, Endocrine System Disorders, Gastrointestinal Disease, Hematological Disease, Hepatic System Disease, Hereditary Disorder, Immunological Disease, Infectious Disease, Metabolic Disease, Neurological Disease, Organismal Injury and Abnormalities, Renal and Urological Disease, R…
CALR	calreticulin	Cytoplasm	transcription regulator		P27797	x	unspecified application	Cancer, Cardiovascular Disease, Connective Tissue Disorders, Dermatological Diseases and Conditions, Developmental Disorder, Endocrine System Disorders, Gastrointestinal Disease, Hereditary Disorder, Immunological Disease, Inflammatory Disease, Inflammatory Response, Neurological Disease, Organismal Injury and Abnormalities, Psychological Disorders, Renal and Urological Disease, Skeletal and Musc…
CAT	catalase	Cytoplasm	enzyme	fomepizole	P04040	x	diagnosis	Cancer, Cardiovascular Disease, Connective Tissue Disorders, Dermatological Diseases and Conditions, Developmental Disorder, Endocrine System Disorders, Gastrointestinal Disease, Hematological Disease, Hepatic System Disease, Hereditary Disorder, Immunological Disease, Infectious Disease, Inflammatory Disease, Inflammatory Response, Metabolic Disease, Organismal Injury and Abnormalities, Renal an…
CBX4	chromobox homolog 4	Nucleus	transcription regulator		O00257	x	prognosis	Cancer, Developmental Disorder, Immunological Disease, Organismal Injury and Abnormalities, Reproductive System Disease
CCNA2	cyclin A2	Nucleus	other		P20248	x	efficacy,prognosis	Cancer, Cardiovascular Disease, Dermatological Diseases and Conditions, Developmental Disorder, Gastrointestinal Disease, Hepatic System Disease, Hereditary Disorder, Immunological Disease, Infectious Disease, Inflammatory Disease, Inflammatory Response, Organismal Injury and Abnormalities, Renal and Urological Disease, Reproductive System Disease, Respiratory Disease, Skeletal and Muscular Disor…
CDC73	cell division cycle 73	Nucleus	other		Q6P1J9	x	diagnosis	Cancer, Endocrine System Disorders, Gastrointestinal Disease, Hereditary Disorder, Organismal Injury and Abnormalities, Reproductive System Disease
CES1	carboxylesterase 1	Cytoplasm	enzyme		P23141	x	unspecified application	Cancer, Cardiovascular Disease, Gastrointestinal Disease, Hepatic System Disease, Hereditary Disorder, Inflammatory Response, Metabolic Disease, Organismal Injury and Abnormalities, Reproductive System Disease
COL3A1	collagen, type III, alpha 1	Extracellular Space	other	collagenase clostridium histolyticum	P02461	x	diagnosis,efficacy	Cancer, Cardiovascular Disease, Connective Tissue Disorders, Dermatological Diseases and Conditions, Developmental Disorder, Gastrointestinal Disease, Hematological Disease, Hepatic System Disease, Hereditary Disorder, Immunological Disease, Infectious Disease, Inflammatory Disease, Inflammatory Response, Metabolic Disease, Neurological Disease, Organismal Injury and Abnormalities, Psychological …
CTNNB1	catenin (cadherin-associated protein), beta 1, 88kDa	Nucleus	transcription regulator		P35222	x	diagnosis,disease progression,efficacy,prognosis	Cancer, Cardiovascular Disease, Connective Tissue Disorders, Dermatological Diseases and Conditions, Developmental Disorder, Endocrine System Disorders, Gastrointestinal Disease, Hematological Disease, Hepatic System Disease, Hereditary Disorder, Immunological Disease, Infectious Disease, Inflammatory Disease, Metabolic Disease, Neurological Disease, Organismal Injury and Abnormalities, Psycholog…
CTTN	cortactin	Plasma Membrane	other		Q14247	x	efficacy	Cancer, Gastrointestinal Disease, Hepatic System Disease, Inflammatory Response
DDX5	DEAD (Asp-Glu-Ala-Asp) box helicase 5	Nucleus	enzyme		P17844	x	unspecified application	Cancer, Gastrointestinal Disease, Hepatic System Disease, Infectious Disease, Inflammatory Disease, Inflammatory Response, Organismal Injury and Abnormalities, Renal and Urological Disease, Reproductive System Disease
DNMT1	DNA (cytosine-5-)-methyltransferase 1	Nucleus	enzyme	5-azacytidine/decitabine, 5-azacytidine/cytarabine/decitabine, 5-azacytidine, decitabine	P26358	x	diagnosis	Auditory Disease, Cancer, Connective Tissue Disorders, Developmental Disorder, Endocrine System Disorders, Gastrointestinal Disease, Hematological Disease, Hereditary Disorder, Immunological Disease, Inflammatory Disease, Neurological Disease, Organismal Injury and Abnormalities, Psychological Disorders, Reproductive System Disease, Respiratory Disease, Skeletal and Muscular Disorders
ENO1	enolase 1, (alpha)	Cytoplasm	enzyme		P06733	x	diagnosis	Cancer, Connective Tissue Disorders, Dermatological Diseases and Conditions, Endocrine System Disorders, Gastrointestinal Disease, Hematological Disease, Immunological Disease, Inflammatory Disease, Inflammatory Response, Organismal Injury and Abnormalities, Reproductive System Disease, Respiratory Disease, Skeletal and Muscular Disorders
ESR1	estrogen receptor 1	Nucleus	ligand-dependent nuclear receptor	17-alpha-ethinylestradiol, fulvestrant, beta-estradiol, estradiol 17beta-cypionate, estriol, estrone, estradiol valerate, mestranol, 3-(4-methoxy)phenyl-4-((4-(2-(1-piperidinyl)ethoxy)phenyl)methyl)-2H-1-benzopyran-7-ol, bazedoxifene, estradiol valerate/testosterone enanthate, TAS-108, ethynodiol diacetate, ethinyl estradiol/ethynodiol diacetate, estradiol acetate, esterified estrogens, estradiol…	P03372	x	diagnosis,disease progression,efficacy,prognosis,response to therapy	Cancer, Cardiovascular Disease, Connective Tissue Disorders, Dermatological Diseases and Conditions, Developmental Disorder, Endocrine System Disorders, Gastrointestinal Disease, Hematological Disease, Hepatic System Disease, Hereditary Disorder, Immunological Disease, Infectious Disease, Inflammatory Disease, Inflammatory Response, Metabolic Disease, Neurological Disease, Nutritional Disease, Op…
ETS1	v-ets avian erythroblastosis virus E26 oncogene homolog 1	Nucleus	transcription regulator		P14921	x	unspecified application	Cancer, Cardiovascular Disease, Developmental Disorder, Endocrine System Disorders, Gastrointestinal Disease, Hematological Disease, Immunological Disease, Inflammatory Disease, Inflammatory Response, Metabolic Disease, Organismal Injury and Abnormalities, Reproductive System Disease
EZR	ezrin	Plasma Membrane	other		P15311	x	prognosis	Cancer, Gastrointestinal Disease, Neurological Disease, Organismal Injury and Abnormalities, Renal and Urological Disease, Reproductive System Disease, Respiratory Disease
FABP1	fatty acid binding protein 1, liver	Cytoplasm	transporter		P07148	x	unspecified application	Cancer, Cardiovascular Disease, Gastrointestinal Disease, Hepatic System Disease, Infectious Disease, Inflammatory Disease, Inflammatory Response, Metabolic Disease, Nutritional Disease, Organismal Injury and Abnormalities, Renal and Urological Disease
FABP5	fatty acid binding protein 5 (psoriasis-associated)	Cytoplasm	transporter		Q01469	x	disease progression	Cancer, Cardiovascular Disease, Connective Tissue Disorders, Dermatological Diseases and Conditions, Endocrine System Disorders, Gastrointestinal Disease, Hepatic System Disease, Immunological Disease, Inflammatory Disease, Inflammatory Response, Metabolic Disease, Nutritional Disease, Organismal Injury and Abnormalities, Renal and Urological Disease, Reproductive System Disease, Respiratory Dise…
FLNA	filamin A, alpha	Cytoplasm	other		P21333	x	unspecified application	Cancer, Cardiovascular Disease, Connective Tissue Disorders, Dermatological Diseases and Conditions, Developmental Disorder, Gastrointestinal Disease, Hematological Disease, Hereditary Disorder, Immunological Disease, Infectious Disease, Inflammatory Disease, Inflammatory Response, Metabolic Disease, Neurological Disease, Organismal Injury and Abnormalities, Reproductive System Disease, Respirato…
FLNB	filamin B, beta	Cytoplasm	other		O75369	x	unspecified application	Cancer, Connective Tissue Disorders, Developmental Disorder, Gastrointestinal Disease, Hereditary Disorder, Organismal Injury and Abnormalities, Reproductive System Disease, Skeletal and Muscular Disorders
FOXA1	forkhead box A1	Nucleus	transcription regulator		P55317	x	disease progression	Cancer, Dermatological Diseases and Conditions, Endocrine System Disorders, Gastrointestinal Disease, Infectious Disease, Neurological Disease
GAPDH	glyceraldehyde-3-phosphate dehydrogenase	Cytoplasm	enzyme		P04406	x	diagnosis,unspecified application	Cancer, Dermatological Diseases and Conditions, Endocrine System Disorders, Hematological Disease, Hereditary Disorder, Immunological Disease, Infectious Disease, Inflammatory Disease, Inflammatory Response, Metabolic Disease, Neurological Disease, Organismal Injury and Abnormalities, Psychological Disorders, Reproductive System Disease, Respiratory Disease, Skeletal and Muscular Disorders
GJB2	gap junction protein, beta 2, 26kDa	Plasma Membrane	transporter		P29033	x	disease progression	Auditory Disease, Cancer, Dermatological Diseases and Conditions, Developmental Disorder, Gastrointestinal Disease, Hepatic System Disease, Hereditary Disorder, Inflammatory Response, Neurological Disease, Organismal Injury and Abnormalities, Renal and Urological Disease, Reproductive System Disease, Skeletal and Muscular Disorders
GSN	gelsolin	Extracellular Space	other		P06396	x	disease progression,efficacy	Cancer, Cardiovascular Disease, Connective Tissue Disorders, Dermatological Diseases and Conditions, Developmental Disorder, Gastrointestinal Disease, Hematological Disease, Hereditary Disorder, Immunological Disease, Inflammatory Disease, Inflammatory Response, Metabolic Disease, Neurological Disease, Ophthalmic Disease, Organismal Injury and Abnormalities, Psychological Disorders, Renal and Uro…
HADHA	hydroxyacyl-CoA dehydrogenase/3-ketoacyl-CoA thiolase/enoyl-CoA hydratase (trifunctional protein), alpha subunit	Cytoplasm	enzyme		P40939	x	unspecified application	Cancer, Developmental Disorder, Endocrine System Disorders, Gastrointestinal Disease, Hematological Disease, Hepatic System Disease, Hereditary Disorder, Metabolic Disease, Neurological Disease
HIF1A	hypoxia inducible factor 1, alpha subunit (basic helix-loop-helix transcription factor)	Nucleus	transcription regulator		Q16665	x	diagnosis,efficacy,prognosis,response to therapy	Cancer, Cardiovascular Disease, Connective Tissue Disorders, Dermatological Diseases and Conditions, Developmental Disorder, Endocrine System Disorders, Gastrointestinal Disease, Hematological Disease, Hepatic System Disease, Hereditary Disorder, Hypersensitivity Response, Immunological Disease, Inflammatory Disease, Inflammatory Response, Metabolic Disease, Neurological Disease, Nutritional Dise…
HMGB1	high mobility group box 1	Nucleus	transcription regulator		P09429	x	diagnosis	Cancer, Cardiovascular Disease, Connective Tissue Disorders, Dermatological Diseases and Conditions, Developmental Disorder, Endocrine System Disorders, Gastrointestinal Disease, Hematological Disease, Hepatic System Disease, Hypersensitivity Response, Immunological Disease, Infectious Disease, Inflammatory Disease, Inflammatory Response, Metabolic Disease, Neurological Disease, Nutritional Disea…
HMGB2	high mobility group box 2	Nucleus	transcription regulator		P26583	x	unspecified application	Cancer, Gastrointestinal Disease, Hereditary Disorder, Neurological Disease, Psychological Disorders, Skeletal and Muscular Disorders
HMGN1	high mobility group nucleosome binding domain 1	Nucleus	transcription regulator		P05114	x	unspecified application	Hereditary Disorder, Neurological Disease, Psychological Disorders, Skeletal and Muscular Disorders
HMOX1	heme oxygenase (decycling) 1	Cytoplasm	enzyme	tin mesoporphyrin	P09601	x	efficacy,safety,unspecified application	Cancer, Cardiovascular Disease, Connective Tissue Disorders, Dermatological Diseases and Conditions, Developmental Disorder, Gastrointestinal Disease, Hematological Disease, Hepatic System Disease, Hereditary Disorder, Hypersensitivity Response, Immunological Disease, Infectious Disease, Inflammatory Disease, Inflammatory Response, Metabolic Disease, Neurological Disease, Nutritional Disease, Org…
HNRNPU	heterogeneous nuclear ribonucleoprotein U (scaffold attachment factor A)	Nucleus	transporter		Q00839	x	unspecified application	Cancer, Cardiovascular Disease, Connective Tissue Disorders, Developmental Disorder, Endocrine System Disorders, Hereditary Disorder, Infectious Disease, Metabolic Disease, Neurological Disease, Organismal Injury and Abnormalities, Psychological Disorders, Reproductive System Disease, Skeletal and Muscular Disorders
HSP90AA1	heat shock protein 90kDa alpha (cytosolic), class A member 1	Cytoplasm	enzyme	alvespimycin, retaspimycin, luminespib, cisplatin	P07900	x	safety,unspecified application	Cancer, Connective Tissue Disorders, Endocrine System Disorders, Gastrointestinal Disease, Hepatic System Disease, Hereditary Disorder, Immunological Disease, Infectious Disease, Inflammatory Response, Neurological Disease, Organismal Injury and Abnormalities, Psychological Disorders, Renal and Urological Disease, Reproductive System Disease, Respiratory Disease, Skeletal and Muscular Disorders
HSPA5	heat shock 70kDa protein 5 (glucose-regulated protein, 78kDa)	Cytoplasm	enzyme		P11021	x	unspecified application	Cancer, Connective Tissue Disorders, Dermatological Diseases and Conditions, Developmental Disorder, Gastrointestinal Disease, Hematological Disease, Hepatic System Disease, Hereditary Disorder, Immunological Disease, Infectious Disease, Inflammatory Disease, Inflammatory Response, Metabolic Disease, Neurological Disease, Organismal Injury and Abnormalities, Psychological Disorders, Renal and Uro…
HSPD1	heat shock 60kDa protein 1 (chaperonin)	Cytoplasm	enzyme		P10809	x	diagnosis,prognosis	Cancer, Connective Tissue Disorders, Hematological Disease, Hereditary Disorder, Immunological Disease, Infectious Disease, Inflammatory Disease, Inflammatory Response, Metabolic Disease, Neurological Disease, Ophthalmic Disease, Organismal Injury and Abnormalities, Psychological Disorders, Reproductive System Disease, Respiratory Disease, Skeletal and Muscular Disorders
IKBKB	inhibitor of kappa light polypeptide gene enhancer in B-cells, kinase beta	Cytoplasm	kinase	auranofin	O14920	x	unspecified application	Antimicrobial Response, Cancer, Cardiovascular Disease, Connective Tissue Disorders, Dermatological Diseases and Conditions, Developmental Disorder, Endocrine System Disorders, Gastrointestinal Disease, Hematological Disease, Hepatic System Disease, Hereditary Disorder, Hypersensitivity Response, Immunological Disease, Infectious Disease, Inflammatory Disease, Inflammatory Response, Metabolic Dis…
ISOC1	isochorismatase domain containing 1	Cytoplasm	enzyme		Q96CN7	x	unspecified application	Cancer, Hereditary Disorder, Neurological Disease, Psychological Disorders, Skeletal and Muscular Disorders
ITPA	inosine triphosphatase (nucleoside triphosphate pyrophosphatase)	Cytoplasm	enzyme		Q9BY32	x	safety	Cardiovascular Disease, Dermatological Diseases and Conditions, Developmental Disorder, Hematological Disease, Hereditary Disorder, Metabolic Disease, Neurological Disease, Organismal Injury and Abnormalities
LCP1	lymphocyte cytosolic protein 1 (L-plastin)	Cytoplasm	other		P13796	x	disease progression	Cancer, Cardiovascular Disease, Connective Tissue Disorders, Dermatological Diseases and Conditions, Endocrine System Disorders, Gastrointestinal Disease, Immunological Disease, Infectious Disease, Inflammatory Disease, Inflammatory Response, Metabolic Disease, Organismal Injury and Abnormalities, Renal and Urological Disease, Skeletal and Muscular Disorders
LDHA	lactate dehydrogenase A	Cytoplasm	enzyme		P00338	x	efficacy,unspecified application	Cancer, Developmental Disorder, Endocrine System Disorders, Gastrointestinal Disease, Hematological Disease, Hereditary Disorder, Immunological Disease, Metabolic Disease, Neurological Disease, Organismal Injury and Abnormalities, Psychological Disorders, Reproductive System Disease, Respiratory Disease, Skeletal and Muscular Disorders
LDHB	lactate dehydrogenase B	Cytoplasm	enzyme		P07195	x	unspecified application	Connective Tissue Disorders, Developmental Disorder, Hereditary Disorder, Immunological Disease, Inflammatory Disease, Metabolic Disease, Neurological Disease, Psychological Disorders, Skeletal and Muscular Disorders
MAP2K6	mitogen-activated protein kinase kinase 6	Cytoplasm	kinase		P52564	x	prognosis	Cancer, Cardiovascular Disease, Developmental Disorder, Gastrointestinal Disease, Hepatic System Disease, Hereditary Disorder, Organismal Injury and Abnormalities, Renal and Urological Disease, Reproductive System Disease, Skeletal and Muscular Disorders
MCM2	minichromosome maintenance complex component 2	Nucleus	enzyme		P49736	x	diagnosis,disease progression,efficacy,unspecified application	Cancer, Organismal Injury and Abnormalities, Renal and Urological Disease, Reproductive System Disease, Respiratory Disease
MCM4	minichromosome maintenance complex component 4	Nucleus	enzyme		P33991	x	disease progression	Cancer, Endocrine System Disorders, Gastrointestinal Disease, Hematological Disease, Hereditary Disorder, Immunological Disease, Organismal Injury and Abnormalities, Reproductive System Disease
MFN2	mitofusin 2	Cytoplasm	enzyme		O95140	x	unspecified application	Cancer, Endocrine System Disorders, Gastrointestinal Disease, Hematological Disease, Hereditary Disorder, Inflammatory Disease, Inflammatory Response, Metabolic Disease, Neurological Disease, Nutritional Disease, Ophthalmic Disease, Organismal Injury and Abnormalities, Psychological Disorders, Skeletal and Muscular Disorders
MSH2	mutS homolog 2	Nucleus	enzyme		P43246	x	diagnosis,prognosis	Cancer, Connective Tissue Disorders, Dermatological Diseases and Conditions, Developmental Disorder, Endocrine System Disorders, Gastrointestinal Disease, Hematological Disease, Hereditary Disorder, Immunological Disease, Infectious Disease, Inflammatory Response, Neurological Disease, Organismal Injury and Abnormalities, Psychological Disorders, Reproductive System Disease, Respiratory Disease, …
MYC	v-myc avian myelocytomatosis viral oncogene homolog	Nucleus	transcription regulator		P01106	x	diagnosis,efficacy,prognosis,response to therapy,unspecified application	Cancer, Cardiovascular Disease, Connective Tissue Disorders, Dermatological Diseases and Conditions, Developmental Disorder, Endocrine System Disorders, Gastrointestinal Disease, Hematological Disease, Hepatic System Disease, Hereditary Disorder, Immunological Disease, Infectious Disease, Inflammatory Disease, Inflammatory Response, Metabolic Disease, Neurological Disease, Nutritional Disease, Or…
MYLK	myosin light chain kinase	Cytoplasm	kinase		Q15746	x	prognosis	Cancer, Cardiovascular Disease, Connective Tissue Disorders, Developmental Disorder, Gastrointestinal Disease, Hereditary Disorder, Immunological Disease, Inflammatory Disease, Inflammatory Response, Neurological Disease, Organismal Injury and Abnormalities, Reproductive System Disease, Respiratory Disease, Skeletal and Muscular Disorders
NFE2L2	nuclear factor, erythroid 2-like 2	Nucleus	transcription regulator		Q16236	x	efficacy	Cancer, Cardiovascular Disease, Dermatological Diseases and Conditions, Developmental Disorder, Gastrointestinal Disease, Hematological Disease, Hepatic System Disease, Hypersensitivity Response, Immunological Disease, Infectious Disease, Inflammatory Disease, Inflammatory Response, Metabolic Disease, Neurological Disease, Nutritional Disease, Organismal Injury and Abnormalities, Psychological Di…
NME1	NME/NM23 nucleoside diphosphate kinase 1	Cytoplasm	kinase		P15531	x	unspecified application	Cancer, Gastrointestinal Disease, Hematological Disease, Hepatic System Disease, Hereditary Disorder, Immunological Disease, Neurological Disease, Organismal Injury and Abnormalities, Psychological Disorders, Reproductive System Disease, Skeletal and Muscular Disorders
NPM1	nucleophosmin (nucleolar phosphoprotein B23, numatrin)	Nucleus	transcription regulator		P06748	x	disease progression,unspecified application	Cancer, Gastrointestinal Disease, Hematological Disease, Hepatic System Disease, Hereditary Disorder, Immunological Disease, Inflammatory Response, Neurological Disease, Organismal Injury and Abnormalities, Psychological Disorders, Renal and Urological Disease, Skeletal and Muscular Disorders
PFN1	profilin 1	Cytoplasm	other		P07737	x	unspecified application	Cancer, Cardiovascular Disease, Dermatological Diseases and Conditions, Developmental Disorder, Gastrointestinal Disease, Hepatic System Disease, Hereditary Disorder, Immunological Disease, Inflammatory Disease, Inflammatory Response, Neurological Disease, Organismal Injury and Abnormalities, Psychological Disorders, Reproductive System Disease, Skeletal and Muscular Disorders
PKM	pyruvate kinase, muscle	Cytoplasm	kinase		P14618	x	unspecified application	Cancer, Dermatological Diseases and Conditions, Endocrine System Disorders, Gastrointestinal Disease, Hepatic System Disease, Hereditary Disorder, Immunological Disease, Inflammatory Disease, Neurological Disease, Organismal Injury and Abnormalities, Psychological Disorders, Reproductive System Disease, Respiratory Disease, Skeletal and Muscular Disorders
PRDX3	peroxiredoxin 3	Cytoplasm	enzyme		P30048	x	diagnosis	Cancer, Cardiovascular Disease, Developmental Disorder, Gastrointestinal Disease, Hematological Disease, Hepatic System Disease, Hereditary Disorder, Immunological Disease, Organismal Injury and Abnormalities, Skeletal and Muscular Disorders
PTEN	phosphatase and tensin homolog	Cytoplasm	phosphatase		P60484	x	diagnosis,disease progression,efficacy,prognosis,response to therapy	Cancer, Cardiovascular Disease, Connective Tissue Disorders, Dermatological Diseases and Conditions, Developmental Disorder, Endocrine System Disorders, Gastrointestinal Disease, Hematological Disease, Hepatic System Disease, Hereditary Disorder, Hypersensitivity Response, Immunological Disease, Infectious Disease, Inflammatory Disease, Inflammatory Response, Metabolic Disease, Neurological Disea…
PTPN1	protein tyrosine phosphatase, non-receptor type 1	Cytoplasm	phosphatase		P18031	x	prognosis	Cancer, Connective Tissue Disorders, Endocrine System Disorders, Gastrointestinal Disease, Hematological Disease, Hepatic System Disease, Immunological Disease, Infectious Disease, Inflammatory Response, Metabolic Disease, Neurological Disease, Nutritional Disease, Organismal Injury and Abnormalities, Psychological Disorders, Reproductive System Disease
PTTG1	pituitary tumor-transforming 1	Nucleus	transcription regulator		O95997	x	prognosis	Cancer, Developmental Disorder, Endocrine System Disorders, Gastrointestinal Disease, Hematological Disease, Immunological Disease, Infectious Disease, Inflammatory Response, Metabolic Disease, Neurological Disease, Nutritional Disease, Organismal Injury and Abnormalities, Renal and Urological Disease, Reproductive System Disease, Respiratory Disease
RB1	retinoblastoma 1	Nucleus	transcription regulator		P06400	x	diagnosis,efficacy,prognosis,unspecified application	Auditory Disease, Cancer, Cardiovascular Disease, Connective Tissue Disorders, Dermatological Diseases and Conditions, Developmental Disorder, Endocrine System Disorders, Gastrointestinal Disease, Hematological Disease, Hepatic System Disease, Hereditary Disorder, Immunological Disease, Infectious Disease, Inflammatory Disease, Metabolic Disease, Neurological Disease, Nutritional Disease, Ophthal…
RPS24	ribosomal protein S24	Cytoplasm	other		P62847	x	unspecified application	Cancer, Connective Tissue Disorders, Developmental Disorder, Hematological Disease, Hereditary Disorder, Immunological Disease, Inflammatory Disease, Organismal Injury and Abnormalities, Reproductive System Disease, Skeletal and Muscular Disorders
RPS4X	ribosomal protein S4, X-linked	Cytoplasm	other		P62701	x	diagnosis	Cancer, Gastrointestinal Disease, Hematological Disease, Hepatic System Disease, Neurological Disease, Organismal Injury and Abnormalities, Psychological Disorders, Reproductive System Disease, Skeletal and Muscular Disorders
RPS6KB1	ribosomal protein S6 kinase, 70kDa, polypeptide 1	Cytoplasm	kinase		P23443	x	diagnosis,efficacy,prognosis	Cancer, Cardiovascular Disease, Dermatological Diseases and Conditions, Developmental Disorder, Endocrine System Disorders, Gastrointestinal Disease, Hematological Disease, Hereditary Disorder, Immunological Disease, Metabolic Disease, Neurological Disease, Nutritional Disease, Organismal Injury and Abnormalities, Psychological Disorders, Reproductive System Disease, Respiratory Disease
S100A7	S100 calcium binding protein A7	Cytoplasm	other		P31151	x	unspecified application	Antimicrobial Response, Cancer, Dermatological Diseases and Conditions, Immunological Disease, Infectious Disease, Inflammatory Disease, Inflammatory Response, Metabolic Disease, Neurological Disease, Ophthalmic Disease, Organismal Injury and Abnormalities, Psychological Disorders, Reproductive System Disease
SARNP	SAP domain containing ribonucleoprotein	Nucleus	other		P82979	x	diagnosis	Cancer, Organismal Injury and Abnormalities, Renal and Urological Disease
SAT1	spermidine/spermine N1-acetyltransferase 1	Cytoplasm	enzyme		P21673	x	diagnosis	Cancer, Cardiovascular Disease, Dermatological Diseases and Conditions, Endocrine System Disorders, Gastrointestinal Disease, Hereditary Disorder, Inflammatory Disease, Neurological Disease, Nutritional Disease, Organismal Injury and Abnormalities, Psychological Disorders, Reproductive System Disease, Respiratory Disease, Skeletal and Muscular Disorders
SERPINA3	serpin peptidase inhibitor, clade A (alpha-1 antiproteinase, antitrypsin), member 3	Extracellular Space	other		P01011	x	unspecified application	Cancer, Cardiovascular Disease, Endocrine System Disorders, Gastrointestinal Disease, Hereditary Disorder, Inflammatory Response, Metabolic Disease, Neurological Disease, Ophthalmic Disease, Organismal Injury and Abnormalities, Psychological Disorders, Renal and Urological Disease, Skeletal and Muscular Disorders
SERPINB3	serpin peptidase inhibitor, clade B (ovalbumin), member 3	Cytoplasm	other		P29508	x	diagnosis	Antimicrobial Response, Cancer, Dermatological Diseases and Conditions, Gastrointestinal Disease, Immunological Disease, Infectious Disease, Inflammatory Disease, Inflammatory Response, Organismal Injury and Abnormalities, Reproductive System Disease
SERPINB5	serpin peptidase inhibitor, clade B (ovalbumin), member 5	Extracellular Space	other		P36952	x	disease progression,efficacy	Cancer, Cardiovascular Disease, Connective Tissue Disorders, Dermatological Diseases and Conditions, Hematological Disease, Immunological Disease, Inflammatory Disease, Inflammatory Response, Organismal Injury and Abnormalities, Reproductive System Disease, Respiratory Disease, Skeletal and Muscular Disorders
SMAD4	SMAD family member 4	Nucleus	transcription regulator		Q13485	x	prognosis	Auditory Disease, Cancer, Cardiovascular Disease, Connective Tissue Disorders, Dental Disease, Dermatological Diseases and Conditions, Developmental Disorder, Endocrine System Disorders, Gastrointestinal Disease, Hematological Disease, Hepatic System Disease, Hereditary Disorder, Inflammatory Disease, Inflammatory Response, Neurological Disease, Ophthalmic Disease, Organismal Injury and Abnormali…
STK11	serine/threonine kinase 11	Cytoplasm	kinase		Q15831	x	diagnosis	Cancer, Connective Tissue Disorders, Dermatological Diseases and Conditions, Developmental Disorder, Endocrine System Disorders, Gastrointestinal Disease, Hematological Disease, Hepatic System Disease, Hereditary Disorder, Immunological Disease, Inflammatory Response, Neurological Disease, Organismal Injury and Abnormalities, Reproductive System Disease, Respiratory Disease, Skeletal and Muscular…
STMN1	stathmin 1	Cytoplasm	other		P16949	x	efficacy	Cancer, Hematological Disease, Immunological Disease, Inflammatory Disease, Neurological Disease, Organismal Injury and Abnormalities, Psychological Disorders, Renal and Urological Disease, Respiratory Disease, Skeletal and Muscular Disorders
TERF1	telomeric repeat binding factor (NIMA-interacting) 1	Nucleus	other		P54274	x	diagnosis,disease progression	Cancer, Neurological Disease, Respiratory Disease
TGM3	transglutaminase 3	Cytoplasm	enzyme		Q08188	x	unspecified application	Cancer, Dermatological Diseases and Conditions, Gastrointestinal Disease, Immunological Disease, Inflammatory Disease, Inflammatory Response, Organismal Injury and Abnormalities, Reproductive System Disease
TLN1	talin 1	Plasma Membrane	other		Q9Y490	x	unspecified application	Cancer, Cardiovascular Disease, Dermatological Diseases and Conditions, Developmental Disorder, Gastrointestinal Disease, Inflammatory Response, Organismal Injury and Abnormalities, Reproductive System Disease
TNNI3	troponin I type 3 (cardiac)	Cytoplasm	transporter		P19429	x	diagnosis,efficacy,unspecified application	Cancer, Cardiovascular Disease, Hereditary Disorder, Infectious Disease, Inflammatory Disease, Inflammatory Response, Neurological Disease, Organismal Injury and Abnormalities, Renal and Urological Disease, Reproductive System Disease, Respiratory Disease, Skeletal and Muscular Disorders
TP53	tumor protein p53	Nucleus	transcription regulator		P04637	x	diagnosis,disease progression,efficacy,prognosis,response to therapy,unspecified application	Antimicrobial Response, Cancer, Cardiovascular Disease, Connective Tissue Disorders, Dermatological Diseases and Conditions, Developmental Disorder, Endocrine System Disorders, Gastrointestinal Disease, Hematological Disease, Hepatic System Disease, Hereditary Disorder, Immunological Disease, Infectious Disease, Inflammatory Disease, Inflammatory Response, Metabolic Disease, Neurological Disease,…
TRIM29	tripartite motif containing 29	Cytoplasm	transcription regulator		Q14134	x	diagnosis	Cancer, Endocrine System Disorders, Gastrointestinal Disease, Infectious Disease, Organismal Injury and Abnormalities, Renal and Urological Disease
VEGFA	vascular endothelial growth factor A	Extracellular Space	growth factor	dalteparin, bevacizumab, ranibizumab, aflibercept, bevacizumab/erlotinib, bevacizumab/sorafenib, bevacizumab/5-fluorouracil, bevacizumab/temozolomide, bevacizumab/irinotecan, bevacizumab/carmustine/lomustine, bevacizumab/paclitaxel, bevacizumab/irinotecan/oxaliplatin, aflibercept/irinotecan, bevacizumab/capecitabine/oxaliplatin, bevacizumab/panitumumab, bevacizumab/cetuximab, bevacizumab/pemetrex…	P15692	x	diagnosis,efficacy,prognosis,safety,unspecified application	Auditory Disease, Cancer, Cardiovascular Disease, Connective Tissue Disorders, Dermatological Diseases and Conditions, Developmental Disorder, Endocrine System Disorders, Gastrointestinal Disease, Hematological Disease, Hepatic System Disease, Hereditary Disorder, Hypersensitivity Response, Immunological Disease, Infectious Disease, Inflammatory Disease, Inflammatory Response, Metabolic Disease, …
XRCC6	X-ray repair complementing defective repair in Chinese hamster cells 6	Nucleus	enzyme		P12956	x	unspecified application	Cancer, Dermatological Diseases and Conditions, Developmental Disorder, Gastrointestinal Disease, Hematological Disease, Hereditary Disorder, Immunological Disease, Inflammatory Disease, Inflammatory Response, Neurological Disease, Nutritional Disease, Organismal Injury and Abnormalities, Psychological Disorders, Reproductive System Disease, Skeletal and Muscular Disorders
YWHAE	tyrosine 3-monooxygenase/tryptophan 5-monooxygenase activation protein, epsilon	Cytoplasm	other		P62258	x	diagnosis	Cancer, Cardiovascular Disease, Dermatological Diseases and Conditions, Developmental Disorder, Gastrointestinal Disease, Hematological Disease, Hereditary Disorder, Immunological Disease, Neurological Disease, Organismal Injury and Abnormalities, Psychological Disorders, Reproductive System Disease, Respiratory Disease

## Sheet: Glycosylation
Symbol	Entrez Gene Name	Location	Family	Drug(s)	GenPept/UniProt/Swiss-Prot Accession	Human	Biomarker Application(s)	Diseases
ABCA4	ATP-binding cassette, sub-family A (ABC1), member 4	Plasma Membrane	transporter		P78363	x	unspecified application	Cancer, Hereditary Disorder, Ophthalmic Disease, Organismal Injury and Abnormalities, Reproductive System Disease
ABCB11	ATP-binding cassette, sub-family B (MDR/TAP), member 11	Plasma Membrane	transporter		O95342	x	unspecified application	Cancer, Developmental Disorder, Gastrointestinal Disease, Hepatic System Disease, Hereditary Disorder, Inflammatory Disease, Inflammatory Response, Organismal Injury and Abnormalities, Reproductive System Disease
ABCG2	ATP-binding cassette, sub-family G (WHITE), member 2	Plasma Membrane	transporter		Q9UNQ0	x	efficacy,prognosis	Cancer, Cardiovascular Disease, Connective Tissue Disorders, Developmental Disorder, Gastrointestinal Disease, Hematological Disease, Hepatic System Disease, Hereditary Disorder, Immunological Disease, Inflammatory Disease, Inflammatory Response, Metabolic Disease, Neurological Disease, Organismal Injury and Abnormalities, Psychological Disorders, Reproductive System Disease, Skeletal and Muscula…
ACE	angiotensin I converting enzyme	Plasma Membrane	peptidase	pentopril, perindoprilat, amlodipine/benazepril, hydrochlorothiazide/lisinopril, benazepril, enalapril, perindopril, captopril, cilazapril, enalapril/felodipine, hydrochlorothiazide/moexipril, benazepril/hydrochlorothiazide, hydrochlorothiazide/quinapril, fosinopril/hydrochlorothiazide, captopril/hydrochlorothiazide, enalapril/hydrochlorothiazide, ramipril, moexipril, quinapril, lisinopril, enala…	P12821	x	efficacy,prognosis	Cancer, Cardiovascular Disease, Connective Tissue Disorders, Developmental Disorder, Endocrine System Disorders, Gastrointestinal Disease, Hematological Disease, Hereditary Disorder, Immunological Disease, Inflammatory Disease, Inflammatory Response, Metabolic Disease, Neurological Disease, Nutritional Disease, Organismal Injury and Abnormalities, Psychological Disorders, Renal and Urological Dis…
ADIPOQ	adiponectin, C1Q and collagen domain containing	Extracellular Space	other		Q15848	x	diagnosis,efficacy,prognosis,response to therapy,safety,unspecified application	Cancer, Cardiovascular Disease, Connective Tissue Disorders, Dermatological Diseases and Conditions, Developmental Disorder, Endocrine System Disorders, Gastrointestinal Disease, Hematological Disease, Hepatic System Disease, Hereditary Disorder, Hypersensitivity Response, Immunological Disease, Inflammatory Disease, Inflammatory Response, Metabolic Disease, Neurological Disease, Nutritional Dise…
AHSG	alpha-2-HS-glycoprotein	Extracellular Space	other		P02765	x	unspecified application	Cancer, Cardiovascular Disease, Connective Tissue Disorders, Dermatological Diseases and Conditions, Endocrine System Disorders, Immunological Disease, Inflammatory Disease, Inflammatory Response, Metabolic Disease, Nutritional Disease, Organismal Injury and Abnormalities, Renal and Urological Disease, Respiratory Disease, Skeletal and Muscular Disorders
ALCAM	activated leukocyte cell adhesion molecule	Plasma Membrane	other		Q13740	x	prognosis	Cancer, Endocrine System Disorders, Gastrointestinal Disease, Immunological Disease, Inflammatory Disease, Inflammatory Response, Neurological Disease, Organismal Injury and Abnormalities, Renal and Urological Disease, Reproductive System Disease, Respiratory Disease, Skeletal and Muscular Disorders
AMBP	alpha-1-microglobulin/bikunin precursor	Extracellular Space	transporter		P02760	x	safety,unspecified application	Cancer, Dermatological Diseases and Conditions, Gastrointestinal Disease, Hepatic System Disease, Inflammatory Disease, Inflammatory Response, Organismal Injury and Abnormalities, Psychological Disorders, Renal and Urological Disease, Reproductive System Disease, Respiratory Disease
APOB	apolipoprotein B	Extracellular Space	transporter	mipomersen	P04114	x	diagnosis,efficacy	Cancer, Cardiovascular Disease, Connective Tissue Disorders, Dermatological Diseases and Conditions, Developmental Disorder, Endocrine System Disorders, Gastrointestinal Disease, Hematological Disease, Hepatic System Disease, Hereditary Disorder, Infectious Disease, Inflammatory Disease, Inflammatory Response, Metabolic Disease, Neurological Disease, Nutritional Disease, Organismal Injury and Abn…
APOH	apolipoprotein H (beta-2-glycoprotein I)	Extracellular Space	transporter		P02749	x	unspecified application	Cardiovascular Disease, Connective Tissue Disorders, Gastrointestinal Disease, Hematological Disease, Immunological Disease, Inflammatory Disease, Inflammatory Response, Organismal Injury and Abnormalities, Reproductive System Disease, Respiratory Disease, Skeletal and Muscular Disorders
ASAH1	N-acylsphingosine amidohydrolase (acid ceramidase) 1	Cytoplasm	enzyme		Q13510	x	unspecified application	Cancer, Connective Tissue Disorders, Developmental Disorder, Hereditary Disorder, Inflammatory Disease, Metabolic Disease, Neurological Disease, Nutritional Disease, Organismal Injury and Abnormalities, Reproductive System Disease, Skeletal and Muscular Disorders
BRCA1	breast cancer 1, early onset	Nucleus	transcription regulator		P38398	x	diagnosis,efficacy,response to therapy	Cancer, Connective Tissue Disorders, Dermatological Diseases and Conditions, Developmental Disorder, Endocrine System Disorders, Gastrointestinal Disease, Hematological Disease, Hepatic System Disease, Hereditary Disorder, Immunological Disease, Infectious Disease, Metabolic Disease, Neurological Disease, Organismal Injury and Abnormalities, Psychological Disorders, Renal and Urological Disease, …
C3	complement component 3	Extracellular Space	peptidase		P01024	x	efficacy	Antimicrobial Response, Cancer, Cardiovascular Disease, Connective Tissue Disorders, Dermatological Diseases and Conditions, Developmental Disorder, Endocrine System Disorders, Gastrointestinal Disease, Hematological Disease, Hepatic System Disease, Hereditary Disorder, Hypersensitivity Response, Immunological Disease, Infectious Disease, Inflammatory Disease, Inflammatory Response, Metabolic Dis…
CASR	calcium-sensing receptor	Plasma Membrane	G-protein coupled receptor	cinacalcet	P41180	x	diagnosis	Cancer, Cardiovascular Disease, Connective Tissue Disorders, Developmental Disorder, Endocrine System Disorders, Gastrointestinal Disease, Hematological Disease, Hereditary Disorder, Inflammatory Disease, Inflammatory Response, Metabolic Disease, Neurological Disease, Nutritional Disease, Organismal Injury and Abnormalities, Renal and Urological Disease, Reproductive System Disease, Skeletal and …
CAT	catalase	Cytoplasm	enzyme	fomepizole	P04040	x	diagnosis	Cancer, Cardiovascular Disease, Connective Tissue Disorders, Dermatological Diseases and Conditions, Developmental Disorder, Endocrine System Disorders, Gastrointestinal Disease, Hematological Disease, Hepatic System Disease, Hereditary Disorder, Immunological Disease, Infectious Disease, Inflammatory Disease, Inflammatory Response, Metabolic Disease, Organismal Injury and Abnormalities, Renal an…
CD14	CD14 molecule	Plasma Membrane	transmembrane receptor		P08571	x	efficacy	Antimicrobial Response, Cancer, Cardiovascular Disease, Connective Tissue Disorders, Dermatological Diseases and Conditions, Developmental Disorder, Gastrointestinal Disease, Hematological Disease, Hepatic System Disease, Hereditary Disorder, Immunological Disease, Infectious Disease, Inflammatory Disease, Inflammatory Response, Metabolic Disease, Neurological Disease, Nutritional Disease, Organi…
CD27	CD27 molecule	Plasma Membrane	transmembrane receptor		P26842	x	unspecified application	Cancer, Connective Tissue Disorders, Dermatological Diseases and Conditions, Endocrine System Disorders, Gastrointestinal Disease, Hematological Disease, Immunological Disease, Infectious Disease, Inflammatory Disease, Inflammatory Response, Metabolic Disease, Skeletal and Muscular Disorders
CD36	CD36 molecule (thrombospondin receptor)	Plasma Membrane	transmembrane receptor		P16671	x	efficacy	Cancer, Cardiovascular Disease, Connective Tissue Disorders, Dermatological Diseases and Conditions, Developmental Disorder, Endocrine System Disorders, Gastrointestinal Disease, Hematological Disease, Hereditary Disorder, Hypersensitivity Response, Immunological Disease, Infectious Disease, Inflammatory Disease, Inflammatory Response, Metabolic Disease, Neurological Disease, Nutritional Disease,…
CD44	CD44 molecule (Indian blood group)	Plasma Membrane	enzyme		P16070	x	diagnosis,disease progression,prognosis,unspecified application	Cancer, Cardiovascular Disease, Connective Tissue Disorders, Dermatological Diseases and Conditions, Gastrointestinal Disease, Hematological Disease, Hepatic System Disease, Hereditary Disorder, Immunological Disease, Infectious Disease, Inflammatory Disease, Inflammatory Response, Neurological Disease, Nutritional Disease, Organismal Injury and Abnormalities, Psychological Disorders, Renal and U…
CD47	CD47 molecule	Plasma Membrane	transmembrane receptor		Q08722	x	unspecified application	Cancer, Cardiovascular Disease, Dermatological Diseases and Conditions, Developmental Disorder, Gastrointestinal Disease, Hematological Disease, Hereditary Disorder, Hypersensitivity Response, Immunological Disease, Infectious Disease, Inflammatory Disease, Inflammatory Response, Metabolic Disease, Neurological Disease, Organismal Injury and Abnormalities, Respiratory Disease, Skeletal and Muscul…
CD69	CD69 molecule	Plasma Membrane	transmembrane receptor		Q07108	x	efficacy	Cancer, Connective Tissue Disorders, Gastrointestinal Disease, Hematological Disease, Immunological Disease, Infectious Disease, Inflammatory Disease, Inflammatory Response, Ophthalmic Disease, Organismal Injury and Abnormalities, Reproductive System Disease, Respiratory Disease, Skeletal and Muscular Disorders
CDH1	cadherin 1, type 1, E-cadherin (epithelial)	Plasma Membrane	other		P12830	x	diagnosis,disease progression,efficacy,prognosis	Cancer, Connective Tissue Disorders, Dermatological Diseases and Conditions, Developmental Disorder, Endocrine System Disorders, Gastrointestinal Disease, Hepatic System Disease, Hereditary Disorder, Immunological Disease, Inflammatory Disease, Inflammatory Response, Organismal Injury and Abnormalities, Renal and Urological Disease, Reproductive System Disease, Respiratory Disease, Skeletal and M…
CDH2	cadherin 2, type 1, N-cadherin (neuronal)	Plasma Membrane	other	N-ac-CHAVC-NH2	P19022	x	diagnosis,prognosis	Cancer, Connective Tissue Disorders, Developmental Disorder, Endocrine System Disorders, Gastrointestinal Disease, Hereditary Disorder, Metabolic Disease, Neurological Disease, Organismal Injury and Abnormalities, Psychological Disorders, Reproductive System Disease, Skeletal and Muscular Disorders
CEACAM1	carcinoembryonic antigen-related cell adhesion molecule 1 (biliary glycoprotein)	Plasma Membrane	other		P13688	x	diagnosis,efficacy	Cancer, Connective Tissue Disorders, Gastrointestinal Disease, Immunological Disease, Inflammatory Disease, Inflammatory Response, Respiratory Disease, Skeletal and Muscular Disorders
CEACAM6	carcinoembryonic antigen-related cell adhesion molecule 6 (non-specific cross reacting antigen)	Plasma Membrane	other		P40199	x	diagnosis,prognosis	Cancer, Endocrine System Disorders, Gastrointestinal Disease, Infectious Disease, Inflammatory Response, Organismal Injury and Abnormalities, Reproductive System Disease
CETP	cholesteryl ester transfer protein, plasma	Extracellular Space	enzyme	torcetrapib	P11597	x	efficacy	Cancer, Cardiovascular Disease, Dermatological Diseases and Conditions, Developmental Disorder, Endocrine System Disorders, Gastrointestinal Disease, Hematological Disease, Hereditary Disorder, Metabolic Disease, Neurological Disease, Organismal Injury and Abnormalities, Psychological Disorders, Reproductive System Disease
CGB (includes others)	chorionic gonadotropin, beta polypeptide	Extracellular Space	other		P01233	x	prognosis,unspecified application	Cancer, Developmental Disorder, Endocrine System Disorders, Nutritional Disease, Organismal Injury and Abnormalities, Renal and Urological Disease, Reproductive System Disease
CLU	clusterin	Cytoplasm	other		P10909	x	efficacy,unspecified application	Cancer, Cardiovascular Disease, Connective Tissue Disorders, Dermatological Diseases and Conditions, Developmental Disorder, Endocrine System Disorders, Gastrointestinal Disease, Hepatic System Disease, Hereditary Disorder, Immunological Disease, Infectious Disease, Inflammatory Disease, Inflammatory Response, Metabolic Disease, Neurological Disease, Ophthalmic Disease, Organismal Injury and Abno…
CP	ceruloplasmin (ferroxidase)	Extracellular Space	enzyme		P00450	x	efficacy	Cancer, Developmental Disorder, Endocrine System Disorders, Gastrointestinal Disease, Hematological Disease, Hepatic System Disease, Hereditary Disorder, Inflammatory Response, Metabolic Disease, Neurological Disease, Nutritional Disease, Ophthalmic Disease, Organismal Injury and Abnormalities, Psychological Disorders, Renal and Urological Disease, Reproductive System Disease, Skeletal and Muscul…
CSF2	colony stimulating factor 2 (granulocyte-macrophage)	Extracellular Space	cytokine		P04141	x	efficacy,prognosis,unspecified application	Antimicrobial Response, Cancer, Cardiovascular Disease, Connective Tissue Disorders, Dermatological Diseases and Conditions, Developmental Disorder, Endocrine System Disorders, Gastrointestinal Disease, Hematological Disease, Hepatic System Disease, Hereditary Disorder, Hypersensitivity Response, Immunological Disease, Infectious Disease, Inflammatory Disease, Inflammatory Response, Metabolic Dis…
CSF1R	colony stimulating factor 1 receptor	Plasma Membrane	kinase	nilotinib, sunitinib, pazopanib	P07333	x	prognosis	Auditory Disease, Cancer, Cardiovascular Disease, Connective Tissue Disorders, Developmental Disorder, Endocrine System Disorders, Gastrointestinal Disease, Hematological Disease, Hepatic System Disease, Hereditary Disorder, Immunological Disease, Inflammatory Disease, Inflammatory Response, Neurological Disease, Nutritional Disease, Organismal Injury and Abnormalities, Psychological Disorders, R…
DLK1	delta-like 1 homolog (Drosophila)	Extracellular Space	other		P80370	x	unspecified application	Cancer, Cardiovascular Disease, Connective Tissue Disorders, Developmental Disorder, Endocrine System Disorders, Gastrointestinal Disease, Hematological Disease, Hepatic System Disease, Inflammatory Disease, Metabolic Disease, Neurological Disease, Nutritional Disease, Ophthalmic Disease, Organismal Injury and Abnormalities, Respiratory Disease
EGF	epidermal growth factor	Extracellular Space	growth factor		P01133	x	diagnosis,efficacy,response to therapy,unspecified application	Cancer, Connective Tissue Disorders, Dermatological Diseases and Conditions, Developmental Disorder, Endocrine System Disorders, Gastrointestinal Disease, Hematological Disease, Hepatic System Disease, Hereditary Disorder, Immunological Disease, Infectious Disease, Inflammatory Disease, Inflammatory Response, Neurological Disease, Nutritional Disease, Ophthalmic Disease, Organismal Injury and Abn…
ELANE	elastase, neutrophil expressed	Extracellular Space	peptidase	SERPINA1	P08246	x	diagnosis,efficacy	Antimicrobial Response, Cancer, Cardiovascular Disease, Connective Tissue Disorders, Dental Disease, Dermatological Diseases and Conditions, Developmental Disorder, Gastrointestinal Disease, Hematological Disease, Hepatic System Disease, Hereditary Disorder, Immunological Disease, Infectious Disease, Inflammatory Disease, Inflammatory Response, Metabolic Disease, Organismal Injury and Abnormaliti…
ERBB3	v-erb-b2 avian erythroblastic leukemia viral oncogene homolog 3	Plasma Membrane	kinase	sapitinib	P21860	x	efficacy,prognosis,safety	Cancer, Cardiovascular Disease, Connective Tissue Disorders, Dermatological Diseases and Conditions, Developmental Disorder, Endocrine System Disorders, Gastrointestinal Disease, Hematological Disease, Hepatic System Disease, Hereditary Disorder, Immunological Disease, Inflammatory Response, Metabolic Disease, Neurological Disease, Organismal Injury and Abnormalities, Psychological Disorders, Ren…
F5	coagulation factor V (proaccelerin, labile factor)	Plasma Membrane	enzyme	drotrecogin alfa, antithrombin alfa	P12259	x	diagnosis	Cancer, Cardiovascular Disease, Developmental Disorder, Endocrine System Disorders, Gastrointestinal Disease, Hematological Disease, Hepatic System Disease, Hereditary Disorder, Hypersensitivity Response, Infectious Disease, Inflammatory Disease, Inflammatory Response, Neurological Disease, Organismal Injury and Abnormalities, Reproductive System Disease, Respiratory Disease
F7	coagulation factor VII (serum prothrombin conversion accelerator)	Plasma Membrane	peptidase	nematode anticoagulant protein c2	P08709	x	unspecified application	Cancer, Cardiovascular Disease, Gastrointestinal Disease, Hematological Disease, Hereditary Disorder, Immunological Disease, Infectious Disease, Inflammatory Response, Metabolic Disease, Neurological Disease, Ophthalmic Disease, Organismal Injury and Abnormalities, Renal and Urological Disease, Respiratory Disease
F8	coagulation factor VIII, procoagulant component	Extracellular Space	peptidase	drotrecogin alfa	P00451	x	diagnosis,efficacy	Cancer, Cardiovascular Disease, Endocrine System Disorders, Gastrointestinal Disease, Hematological Disease, Hereditary Disorder, Immunological Disease, Infectious Disease, Inflammatory Disease, Inflammatory Response, Neurological Disease, Organismal Injury and Abnormalities, Reproductive System Disease, Respiratory Disease
F10	coagulation factor X	Extracellular Space	peptidase	dalteparin, heparin, enoxaparin, rivaroxaban, deligoparin, idraparinux, tifacogin, RPR 120844, RPR 208566, DPC 423, nematode anticoagulant protein c2, apixaban, activated recombinant human factor VII, F8, F9, fondaparinux	P00742	x	efficacy	Cancer, Cardiovascular Disease, Connective Tissue Disorders, Dermatological Diseases and Conditions, Endocrine System Disorders, Gastrointestinal Disease, Hematological Disease, Hereditary Disorder, Immunological Disease, Infectious Disease, Inflammatory Disease, Inflammatory Response, Neurological Disease, Nutritional Disease, Ophthalmic Disease, Organismal Injury and Abnormalities, Psychologica…
F12	coagulation factor XII (Hageman factor)	Extracellular Space	peptidase		P00748	x	prognosis	Cancer, Cardiovascular Disease, Dermatological Diseases and Conditions, Gastrointestinal Disease, Hematological Disease, Hereditary Disorder, Immunological Disease, Infectious Disease, Inflammatory Response, Organismal Injury and Abnormalities
F11R	F11 receptor	Plasma Membrane	other		Q9Y624	x	unspecified application	Cancer, Connective Tissue Disorders, Gastrointestinal Disease, Hematological Disease, Hereditary Disorder, Immunological Disease, Infectious Disease, Inflammatory Disease, Inflammatory Response, Neurological Disease, Organismal Injury and Abnormalities, Psychological Disorders, Reproductive System Disease, Skeletal and Muscular Disorders
FAS	Fas cell surface death receptor	Plasma Membrane	transmembrane receptor	pyrazinamide	P25445	x	diagnosis,disease progression,efficacy	Antimicrobial Response, Cancer, Cardiovascular Disease, Connective Tissue Disorders, Dermatological Diseases and Conditions, Developmental Disorder, Endocrine System Disorders, Gastrointestinal Disease, Hematological Disease, Hepatic System Disease, Hereditary Disorder, Hypersensitivity Response, Immunological Disease, Infectious Disease, Inflammatory Disease, Inflammatory Response, Metabolic Dis…
FLT3	fms-related tyrosine kinase 3	Plasma Membrane	kinase	sunitinib, dovitinib, tandutinib, cabozantinib, ponatinib, bortezomib/sorafenib, dexamethasone/lenalidomide/sorafenib, bevacizumab/sorafenib, sorafenib, lestaurtinib, midostaurin	P36888	x	efficacy,prognosis	Cancer, Cardiovascular Disease, Connective Tissue Disorders, Endocrine System Disorders, Gastrointestinal Disease, Hematological Disease, Hepatic System Disease, Immunological Disease, Inflammatory Disease, Inflammatory Response, Organismal Injury and Abnormalities, Renal and Urological Disease, Reproductive System Disease, Respiratory Disease, Skeletal and Muscular Disorders
FLT4	fms-related tyrosine kinase 4	Plasma Membrane	transmembrane receptor	sunitinib, pazopanib, axitinib, CEP 7055, tivozanib, motesanib, telatinib, cabozantinib, regorafenib, bortezomib/sorafenib, dexamethasone/lenalidomide/sorafenib, bevacizumab/sorafenib, sorafenib, vandetanib	P35916	x	diagnosis,disease progression,efficacy,prognosis	Cancer, Cardiovascular Disease, Connective Tissue Disorders, Dermatological Diseases and Conditions, Endocrine System Disorders, Gastrointestinal Disease, Hepatic System Disease, Hereditary Disorder, Immunological Disease, Inflammatory Disease, Inflammatory Response, Organismal Injury and Abnormalities, Renal and Urological Disease, Reproductive System Disease, Respiratory Disease, Skeletal and M…
FN1	fibronectin 1	Extracellular Space	enzyme		P02751	x	diagnosis,efficacy,prognosis,unspecified application	Cancer, Cardiovascular Disease, Connective Tissue Disorders, Dermatological Diseases and Conditions, Developmental Disorder, Endocrine System Disorders, Gastrointestinal Disease, Hematological Disease, Hepatic System Disease, Hereditary Disorder, Hypersensitivity Response, Immunological Disease, Infectious Disease, Inflammatory Disease, Inflammatory Response, Metabolic Disease, Neurological Disea…
FOLH1	folate hydrolase (prostate-specific membrane antigen) 1	Plasma Membrane	peptidase	capromab pendetide	Q04609	x	prognosis	Cancer, Gastrointestinal Disease, Hereditary Disorder, Metabolic Disease, Neurological Disease, Psychological Disorders
GAA	glucosidase, alpha; acid	Cytoplasm	enzyme	miglitol, acarbose	P10253	x	diagnosis	Cancer, Cardiovascular Disease, Connective Tissue Disorders, Developmental Disorder, Endocrine System Disorders, Gastrointestinal Disease, Hepatic System Disease, Hereditary Disorder, Immunological Disease, Infectious Disease, Inflammatory Disease, Inflammatory Response, Metabolic Disease, Neurological Disease, Nutritional Disease, Organismal Injury and Abnormalities, Reproductive System Disease,…
GGT1	gamma-glutamyltransferase 1	Plasma Membrane	enzyme		P19440	x	efficacy,safety,unspecified application	Cancer, Connective Tissue Disorders, Dermatological Diseases and Conditions, Developmental Disorder, Gastrointestinal Disease, Hepatic System Disease, Hereditary Disorder, Inflammatory Response, Neurological Disease, Ophthalmic Disease, Organismal Injury and Abnormalities, Renal and Urological Disease, Reproductive System Disease, Respiratory Disease, Skeletal and Muscular Disorders
GOLM1	golgi membrane protein 1	Cytoplasm	other		Q8NBJ4	x	diagnosis	Cancer, Gastrointestinal Disease, Hepatic System Disease, Organismal Injury and Abnormalities
GPNMB	glycoprotein (transmembrane) nmb	Plasma Membrane	enzyme		Q14956	x	unspecified application	Cancer, Endocrine System Disorders, Gastrointestinal Disease, Immunological Disease, Metabolic Disease, Neurological Disease, Ophthalmic Disease, Organismal Injury and Abnormalities, Renal and Urological Disease
GYPC	glycophorin C (Gerbich blood group)	Plasma Membrane	other		P04921	x	unspecified application	Cancer, Cardiovascular Disease, Hereditary Disorder, Neurological Disease, Organismal Injury and Abnormalities, Psychological Disorders, Renal and Urological Disease, Skeletal and Muscular Disorders
HLA-A	major histocompatibility complex, class I, A	Plasma Membrane	other		P30443	x	efficacy,response to therapy	Cancer, Connective Tissue Disorders, Dermatological Diseases and Conditions, Developmental Disorder, Endocrine System Disorders, Gastrointestinal Disease, Hematological Disease, Hereditary Disorder, Immunological Disease, Inflammatory Disease, Inflammatory Response, Metabolic Disease, Ophthalmic Disease, Organismal Injury and Abnormalities, Renal and Urological Disease, Reproductive System Diseas…
HLA-C	major histocompatibility complex, class I, C	Plasma Membrane	other		P10321	x	response to therapy	Cancer, Connective Tissue Disorders, Dermatological Diseases and Conditions, Developmental Disorder, Endocrine System Disorders, Gastrointestinal Disease, Hereditary Disorder, Immunological Disease, Infectious Disease, Inflammatory Disease, Inflammatory Response, Metabolic Disease, Organismal Injury and Abnormalities, Reproductive System Disease, Respiratory Disease, Skeletal and Muscular Disorde…
HSPG2	heparan sulfate proteoglycan 2	Extracellular Space	enzyme		P98160	x	unspecified application	Cancer, Cardiovascular Disease, Connective Tissue Disorders, Dermatological Diseases and Conditions, Developmental Disorder, Gastrointestinal Disease, Hereditary Disorder, Inflammatory Disease, Inflammatory Response, Metabolic Disease, Neurological Disease, Ophthalmic Disease, Organismal Injury and Abnormalities, Psychological Disorders, Reproductive System Disease, Respiratory Disease, Skeletal …
IGF1R	insulin-like growth factor 1 receptor	Plasma Membrane	transmembrane receptor	linsitinib, cixutumumab, ganitumab, AVE1642, BIIB022, IGF1	P08069	x	diagnosis,efficacy,prognosis	Cancer, Cardiovascular Disease, Dermatological Diseases and Conditions, Developmental Disorder, Endocrine System Disorders, Gastrointestinal Disease, Hematological Disease, Hepatic System Disease, Hereditary Disorder, Immunological Disease, Infectious Disease, Inflammatory Disease, Inflammatory Response, Metabolic Disease, Neurological Disease, Nutritional Disease, Organismal Injury and Abnormali…
IL2RG	interleukin 2 receptor, gamma	Plasma Membrane	transmembrane receptor	aldesleukin, denileukin diftitox	P31785	x	unspecified application	Cancer, Dermatological Diseases and Conditions, Developmental Disorder, Gastrointestinal Disease, Hematological Disease, Hereditary Disorder, Hypersensitivity Response, Immunological Disease, Infectious Disease, Inflammatory Disease, Inflammatory Response, Organismal Injury and Abnormalities, Renal and Urological Disease, Reproductive System Disease, Respiratory Disease
IL6ST	interleukin 6 signal transducer (gp130, oncostatin M receptor)	Plasma Membrane	transmembrane receptor		P40189	x	unspecified application	Cancer, Cardiovascular Disease, Connective Tissue Disorders, Developmental Disorder, Endocrine System Disorders, Gastrointestinal Disease, Hematological Disease, Hepatic System Disease, Hypersensitivity Response, Immunological Disease, Infectious Disease, Inflammatory Disease, Inflammatory Response, Metabolic Disease, Neurological Disease, Nutritional Disease, Organismal Injury and Abnormalities,…
INSR	insulin receptor	Plasma Membrane	kinase	insulin detemir, INS, insulin aspart/insulin detemir, insulin glargine/insulin lispro, insulin aspart, insulin glulisine, insulin lispro, insulin glargine, protamine zinc insulin	P06213	x	prognosis	Cancer, Cardiovascular Disease, Connective Tissue Disorders, Dermatological Diseases and Conditions, Developmental Disorder, Endocrine System Disorders, Gastrointestinal Disease, Hematological Disease, Hepatic System Disease, Hereditary Disorder, Immunological Disease, Infectious Disease, Inflammatory Disease, Inflammatory Response, Metabolic Disease, Neurological Disease, Nutritional Disease, Or…
ITGA4	integrin, alpha 4 (antigen CD49D, alpha 4 subunit of VLA-4 receptor)	Plasma Membrane	transmembrane receptor	natalizumab	P13612	x	efficacy,prognosis	Cancer, Cardiovascular Disease, Dermatological Diseases and Conditions, Endocrine System Disorders, Gastrointestinal Disease, Hematological Disease, Hypersensitivity Response, Immunological Disease, Infectious Disease, Inflammatory Disease, Inflammatory Response, Metabolic Disease, Neurological Disease, Organismal Injury and Abnormalities, Renal and Urological Disease, Reproductive System Disease…
ITGB1	integrin, beta 1 (fibronectin receptor, beta polypeptide, antigen CD29 includes MDF2, MSK12)	Plasma Membrane	transmembrane receptor		P05556	x	disease progression,prognosis	Cancer, Cardiovascular Disease, Connective Tissue Disorders, Dermatological Diseases and Conditions, Developmental Disorder, Gastrointestinal Disease, Hematological Disease, Hereditary Disorder, Hypersensitivity Response, Immunological Disease, Infectious Disease, Inflammatory Response, Neurological Disease, Nutritional Disease, Organismal Injury and Abnormalities, Renal and Urological Disease, R…
KDR	kinase insert domain receptor (a type III receptor tyrosine kinase)	Plasma Membrane	kinase	AEE 788, sunitinib, cediranib, pazopanib, axitinib, XL647, CEP 7055, brivanib alaninate, CHIR-265, tivozanib, motesanib, OSI-930, telatinib, ramucirumab, cabozantinib, regorafenib, bortezomib/sorafenib, lapatinib/pazopanib, dexamethasone/lenalidomide/sorafenib, bevacizumab/sorafenib, vatalanib, sorafenib, vandetanib, pegaptanib	P35968	x	disease progression,efficacy,prognosis,response to therapy,safety	Cancer, Cardiovascular Disease, Connective Tissue Disorders, Dermatological Diseases and Conditions, Developmental Disorder, Endocrine System Disorders, Gastrointestinal Disease, Hematological Disease, Hepatic System Disease, Hereditary Disorder, Inflammatory Disease, Inflammatory Response, Metabolic Disease, Neurological Disease, Ophthalmic Disease, Organismal Injury and Abnormalities, Renal and…
KIT	v-kit Hardy-Zuckerman 4 feline sarcoma viral oncogene homolog	Plasma Membrane	transmembrane receptor	dasatinib, sunitinib, pazopanib, tivozanib, motesanib, OSI-930, telatinib, tandutinib, cabozantinib, regorafenib, ponatinib, bortezomib/sorafenib, lapatinib/pazopanib, dexamethasone/lenalidomide/sorafenib, bevacizumab/sorafenib, imatinib/sirolimus, imatinib, sorafenib	P10721	x	diagnosis,efficacy,prognosis,safety,unspecified application	Cancer, Cardiovascular Disease, Connective Tissue Disorders, Dermatological Diseases and Conditions, Developmental Disorder, Endocrine System Disorders, Gastrointestinal Disease, Hematological Disease, Hepatic System Disease, Hereditary Disorder, Hypersensitivity Response, Immunological Disease, Infectious Disease, Inflammatory Disease, Inflammatory Response, Metabolic Disease, Neurological Disea…
KITLG	KIT ligand	Extracellular Space	growth factor		P21583	x	unspecified application	Cancer, Cardiovascular Disease, Dermatological Diseases and Conditions, Developmental Disorder, Gastrointestinal Disease, Hematological Disease, Hepatic System Disease, Hereditary Disorder, Hypersensitivity Response, Immunological Disease, Inflammatory Response, Neurological Disease, Ophthalmic Disease, Organismal Injury and Abnormalities, Reproductive System Disease
KRT8	keratin 8	Cytoplasm	other		P05787	x	prognosis	Cancer, Dermatological Diseases and Conditions, Developmental Disorder, Endocrine System Disorders, Gastrointestinal Disease, Hematological Disease, Hepatic System Disease, Hereditary Disorder, Infectious Disease, Inflammatory Disease, Inflammatory Response, Metabolic Disease, Organismal Injury and Abnormalities, Reproductive System Disease, Respiratory Disease, Skeletal and Muscular Disorders
LDLR	low density lipoprotein receptor	Plasma Membrane	transporter		P01130	x	disease progression,unspecified application	Antimicrobial Response, Cancer, Cardiovascular Disease, Dermatological Diseases and Conditions, Developmental Disorder, Endocrine System Disorders, Gastrointestinal Disease, Hematological Disease, Hepatic System Disease, Hereditary Disorder, Immunological Disease, Infectious Disease, Inflammatory Disease, Inflammatory Response, Metabolic Disease, Neurological Disease, Nutritional Disease, Ophthal…
LEPR	leptin receptor	Plasma Membrane	transmembrane receptor		P48357	x	prognosis	Cancer, Cardiovascular Disease, Connective Tissue Disorders, Dermatological Diseases and Conditions, Developmental Disorder, Endocrine System Disorders, Gastrointestinal Disease, Hematological Disease, Hepatic System Disease, Hereditary Disorder, Immunological Disease, Inflammatory Disease, Inflammatory Response, Metabolic Disease, Neurological Disease, Nutritional Disease, Organismal Injury and …
LPL	lipoprotein lipase	Cytoplasm	enzyme	atorvastatin/niacin, nicotinic acid/pioglitazone, nicotinic acid, tyloxapol, lovastatin/niacin	P06858	x	efficacy,unspecified application	Cancer, Cardiovascular Disease, Dermatological Diseases and Conditions, Endocrine System Disorders, Gastrointestinal Disease, Hematological Disease, Hepatic System Disease, Hereditary Disorder, Immunological Disease, Infectious Disease, Inflammatory Disease, Inflammatory Response, Metabolic Disease, Neurological Disease, Nutritional Disease, Ophthalmic Disease, Organismal Injury and Abnormalities…
LTA	lymphotoxin alpha	Extracellular Space	cytokine		P01374	x	prognosis,safety	Antimicrobial Response, Cancer, Cardiovascular Disease, Connective Tissue Disorders, Dermatological Diseases and Conditions, Endocrine System Disorders, Gastrointestinal Disease, Hematological Disease, Hepatic System Disease, Hereditary Disorder, Immunological Disease, Infectious Disease, Inflammatory Disease, Inflammatory Response, Metabolic Disease, Neurological Disease, Organismal Injury and A…
MBP	myelin basic protein	Extracellular Space	other		P02686	x	diagnosis,unspecified application	Cancer, Dermatological Diseases and Conditions, Gastrointestinal Disease, Hereditary Disorder, Immunological Disease, Inflammatory Disease, Inflammatory Response, Neurological Disease, Organismal Injury and Abnormalities, Psychological Disorders, Renal and Urological Disease, Reproductive System Disease, Skeletal and Muscular Disorders
MME	membrane metallo-endopeptidase	Plasma Membrane	peptidase		P08473	x	diagnosis,efficacy,unspecified application	Cancer, Connective Tissue Disorders, Dermatological Diseases and Conditions, Endocrine System Disorders, Gastrointestinal Disease, Hematological Disease, Hepatic System Disease, Immunological Disease, Inflammatory Disease, Inflammatory Response, Metabolic Disease, Neurological Disease, Organismal Injury and Abnormalities, Psychological Disorders, Renal and Urological Disease, Skeletal and Muscula…
MPO	myeloperoxidase	Cytoplasm	enzyme		P05164	x	diagnosis,efficacy,unspecified application	Antimicrobial Response, Cancer, Cardiovascular Disease, Connective Tissue Disorders, Dermatological Diseases and Conditions, Gastrointestinal Disease, Hematological Disease, Hepatic System Disease, Hereditary Disorder, Immunological Disease, Infectious Disease, Inflammatory Disease, Inflammatory Response, Metabolic Disease, Neurological Disease, Nutritional Disease, Ophthalmic Disease, Organismal…
MUC1	mucin 1, cell surface associated	Plasma Membrane	transcription regulator	HuHMFG1	P15941	x	diagnosis,disease progression,efficacy,prognosis,unspecified application	Cancer, Dermatological Diseases and Conditions, Developmental Disorder, Endocrine System Disorders, Gastrointestinal Disease, Hematological Disease, Hepatic System Disease, Hereditary Disorder, Immunological Disease, Inflammatory Disease, Inflammatory Response, Neurological Disease, Organismal Injury and Abnormalities, Psychological Disorders, Renal and Urological Disease, Reproductive System Dis…
MUC2	mucin 2, oligomeric mucus/gel-forming	Other	other		Q02817	x	diagnosis	Cancer, Gastrointestinal Disease, Inflammatory Disease, Organismal Injury and Abnormalities, Renal and Urological Disease, Reproductive System Disease
MYC	v-myc avian myelocytomatosis viral oncogene homolog	Nucleus	transcription regulator		P01106	x	diagnosis,efficacy,prognosis,response to therapy,unspecified application	Cancer, Cardiovascular Disease, Connective Tissue Disorders, Dermatological Diseases and Conditions, Developmental Disorder, Endocrine System Disorders, Gastrointestinal Disease, Hematological Disease, Hepatic System Disease, Hereditary Disorder, Immunological Disease, Infectious Disease, Inflammatory Disease, Inflammatory Response, Metabolic Disease, Neurological Disease, Nutritional Disease, Or…
MYH7	myosin, heavy chain 7, cardiac muscle, beta	Cytoplasm	enzyme		P12883	x	unspecified application	Cancer, Cardiovascular Disease, Developmental Disorder, Hereditary Disorder, Neurological Disease, Organismal Injury and Abnormalities, Psychological Disorders, Reproductive System Disease, Skeletal and Muscular Disorders
NPPB	natriuretic peptide B	Extracellular Space	other		P16860	x	diagnosis,efficacy,prognosis,safety,unspecified application	Cancer, Cardiovascular Disease, Gastrointestinal Disease, Hematological Disease, Hepatic System Disease, Infectious Disease, Inflammatory Disease, Inflammatory Response, Neurological Disease, Organismal Injury and Abnormalities, Renal and Urological Disease, Respiratory Disease, Skeletal and Muscular Disorders
NTRK2	neurotrophic tyrosine kinase, receptor, type 2	Plasma Membrane	kinase	cabozantinib	Q16620	x	diagnosis,disease progression,response to therapy	Auditory Disease, Cancer, Connective Tissue Disorders, Developmental Disorder, Endocrine System Disorders, Gastrointestinal Disease, Hematological Disease, Hepatic System Disease, Hereditary Disorder, Immunological Disease, Infectious Disease, Inflammatory Disease, Metabolic Disease, Neurological Disease, Nutritional Disease, Organismal Injury and Abnormalities, Psychological Disorders, Renal and…
P2RX7	purinergic receptor P2X, ligand-gated ion channel, 7	Plasma Membrane	ion channel		Q99572	x	diagnosis	Antimicrobial Response, Cancer, Cardiovascular Disease, Connective Tissue Disorders, Dermatological Diseases and Conditions, Endocrine System Disorders, Gastrointestinal Disease, Hepatic System Disease, Hypersensitivity Response, Immunological Disease, Infectious Disease, Inflammatory Disease, Inflammatory Response, Metabolic Disease, Neurological Disease, Organismal Injury and Abnormalities, Psy…
PAPPA	pregnancy-associated plasma protein A, pappalysin 1	Extracellular Space	peptidase		Q13219	x	diagnosis	Cancer, Cardiovascular Disease, Developmental Disorder, Gastrointestinal Disease, Hereditary Disorder, Organismal Injury and Abnormalities
PLAT	plasminogen activator, tissue	Extracellular Space	peptidase	6-aminocaproic acid	P00750	x	diagnosis,efficacy,prognosis,safety,unspecified application	Cancer, Cardiovascular Disease, Connective Tissue Disorders, Dermatological Diseases and Conditions, Developmental Disorder, Endocrine System Disorders, Gastrointestinal Disease, Hematological Disease, Hepatic System Disease, Hereditary Disorder, Hypersensitivity Response, Immunological Disease, Infectious Disease, Inflammatory Disease, Inflammatory Response, Metabolic Disease, Neurological Disea…
POMC	proopiomelanocortin	Extracellular Space	other		P01189	x	diagnosis,efficacy,unspecified application	Cancer, Cardiovascular Disease, Connective Tissue Disorders, Dermatological Diseases and Conditions, Developmental Disorder, Endocrine System Disorders, Hematological Disease, Hereditary Disorder, Immunological Disease, Inflammatory Disease, Inflammatory Response, Metabolic Disease, Nutritional Disease, Organismal Injury and Abnormalities, Psychological Disorders, Reproductive System Disease, Ske…
PROC	protein C (inactivator of coagulation factors Va and VIIIa)	Extracellular Space	peptidase		P04070	x	diagnosis,efficacy	Cardiovascular Disease, Connective Tissue Disorders, Dermatological Diseases and Conditions, Developmental Disorder, Gastrointestinal Disease, Hematological Disease, Hepatic System Disease, Hereditary Disorder, Immunological Disease, Infectious Disease, Inflammatory Disease, Inflammatory Response, Neurological Disease, Nutritional Disease, Ophthalmic Disease, Organismal Injury and Abnormalities, …
PTGS2	prostaglandin-endoperoxide synthase 2 (prostaglandin G/H synthase and cyclooxygenase)	Cytoplasm	enzyme	acetaminophen/pentazocine, acetaminophen/clemastine/pseudoephedrine, aspirin/butalbital/caffeine, acetaminophen/caffeine/dihydrocodeine, aspirin/hydrocodone, aspirin/oxycodone, acetaminophen/aspirin/caffeine, aspirin/pravastatin, acetaminophen/dexbrompheniramine/pseudoephedrine, aspirin/meprobamate, aspirin/caffeine/propoxyphene, aspirin/butalbital/caffeine/codeine, aspirin/caffeine/dihydrocodein…	P35354	x	diagnosis,disease progression,efficacy,prognosis,unspecified application	Cancer, Cardiovascular Disease, Connective Tissue Disorders, Dermatological Diseases and Conditions, Developmental Disorder, Endocrine System Disorders, Gastrointestinal Disease, Hematological Disease, Hepatic System Disease, Hereditary Disorder, Immunological Disease, Infectious Disease, Inflammatory Disease, Inflammatory Response, Metabolic Disease, Neurological Disease, Nutritional Disease, Op…
PTPRC	protein tyrosine phosphatase, receptor type, C	Plasma Membrane	phosphatase		P08575	x	diagnosis,efficacy,unspecified application	Antimicrobial Response, Cancer, Connective Tissue Disorders, Dermatological Diseases and Conditions, Developmental Disorder, Endocrine System Disorders, Gastrointestinal Disease, Hematological Disease, Hepatic System Disease, Hereditary Disorder, Hypersensitivity Response, Immunological Disease, Infectious Disease, Inflammatory Disease, Inflammatory Response, Neurological Disease, Organismal Inju…
RET	ret proto-oncogene	Plasma Membrane	kinase	sunitinib, motesanib, cabozantinib, regorafenib, ponatinib, bortezomib/sorafenib, dexamethasone/lenalidomide/sorafenib, bevacizumab/sorafenib, imatinib/sirolimus, imatinib, sorafenib, vandetanib	P07949	x	efficacy,response to therapy	Auditory Disease, Cancer, Cardiovascular Disease, Connective Tissue Disorders, Dermatological Diseases and Conditions, Developmental Disorder, Endocrine System Disorders, Gastrointestinal Disease, Hematological Disease, Hepatic System Disease, Hereditary Disorder, Immunological Disease, Inflammatory Disease, Inflammatory Response, Neurological Disease, Organismal Injury and Abnormalities, Psychol…
RNASE2	ribonuclease, RNase A family, 2 (liver, eosinophil-derived neurotoxin)	Cytoplasm	enzyme		P10153	x	diagnosis	Cancer, Cardiovascular Disease, Connective Tissue Disorders, Endocrine System Disorders, Hematological Disease, Immunological Disease, Infectious Disease, Inflammatory Disease, Inflammatory Response, Neurological Disease, Organismal Injury and Abnormalities, Reproductive System Disease, Respiratory Disease, Skeletal and Muscular Disorders
SCARB2	scavenger receptor class B, member 2	Plasma Membrane	other		Q14108	x	disease progression	Auditory Disease, Cancer, Cardiovascular Disease, Gastrointestinal Disease, Hereditary Disorder, Infectious Disease, Metabolic Disease, Neurological Disease, Organismal Injury and Abnormalities, Psychological Disorders, Renal and Urological Disease, Skeletal and Muscular Disorders
SDC1	syndecan 1	Plasma Membrane	enzyme		P18827	x	efficacy	Auditory Disease, Cancer, Cardiovascular Disease, Connective Tissue Disorders, Dermatological Diseases and Conditions, Gastrointestinal Disease, Hematological Disease, Hereditary Disorder, Immunological Disease, Infectious Disease, Inflammatory Disease, Inflammatory Response, Metabolic Disease, Neurological Disease, Nutritional Disease, Organismal Injury and Abnormalities, Psychological Disorders…
SERPINA3	serpin peptidase inhibitor, clade A (alpha-1 antiproteinase, antitrypsin), member 3	Extracellular Space	other		P01011	x	unspecified application	Cancer, Cardiovascular Disease, Endocrine System Disorders, Gastrointestinal Disease, Hereditary Disorder, Inflammatory Response, Metabolic Disease, Neurological Disease, Ophthalmic Disease, Organismal Injury and Abnormalities, Psychological Disorders, Renal and Urological Disease, Skeletal and Muscular Disorders
SERPINA5	serpin peptidase inhibitor, clade A (alpha-1 antiproteinase, antitrypsin), member 5	Extracellular Space	other		P05154	x	diagnosis	Cancer, Cardiovascular Disease, Endocrine System Disorders, Gastrointestinal Disease, Hematological Disease, Hepatic System Disease, Infectious Disease, Inflammatory Disease, Organismal Injury and Abnormalities, Reproductive System Disease
SERPINC1	serpin peptidase inhibitor, clade C (antithrombin), member 1	Extracellular Space	enzyme	heparin, enoxaparin, ardeparin, SR-123781A, glucuronyl glucosamine glycan sulfate, fondaparinux, nadroparin	P01008	x	diagnosis,unspecified application	Cancer, Cardiovascular Disease, Connective Tissue Disorders, Dermatological Diseases and Conditions, Endocrine System Disorders, Gastrointestinal Disease, Hematological Disease, Hepatic System Disease, Immunological Disease, Infectious Disease, Inflammatory Disease, Inflammatory Response, Metabolic Disease, Neurological Disease, Nutritional Disease, Ophthalmic Disease, Organismal Injury and Abnor…
SERPINE1	serpin peptidase inhibitor, clade E (nexin, plasminogen activator inhibitor type 1), member 1	Extracellular Space	other	drotrecogin alfa	P05121	x	diagnosis,disease progression,efficacy,prognosis,safety	Cancer, Cardiovascular Disease, Connective Tissue Disorders, Dermatological Diseases and Conditions, Developmental Disorder, Endocrine System Disorders, Gastrointestinal Disease, Hematological Disease, Hepatic System Disease, Hereditary Disorder, Immunological Disease, Infectious Disease, Inflammatory Disease, Inflammatory Response, Metabolic Disease, Neurological Disease, Nutritional Disease, Or…
SHBG	sex hormone-binding globulin	Extracellular Space	other		P04278	x	efficacy,safety	Cancer, Developmental Disorder, Endocrine System Disorders, Gastrointestinal Disease, Metabolic Disease, Nutritional Disease, Organismal Injury and Abnormalities, Reproductive System Disease
SLC29A2	solute carrier family 29 (equilibrative nucleoside transporter), member 2	Cytoplasm	transporter		Q14542	x	efficacy	Cancer, Hematological Disease, Immunological Disease
SPINT2	serine peptidase inhibitor, Kunitz type, 2	Extracellular Space	other		O43291	x	diagnosis	Cancer, Developmental Disorder, Endocrine System Disorders, Gastrointestinal Disease, Hereditary Disorder, Organismal Injury and Abnormalities, Reproductive System Disease
SPOCK2	sparc/osteonectin, cwcv and kazal-like domains proteoglycan (testican) 2	Extracellular Space	other		Q92563	x	diagnosis	Cancer, Organismal Injury and Abnormalities, Reproductive System Disease
SPP1	secreted phosphoprotein 1	Extracellular Space	cytokine		P10451	x	diagnosis,efficacy,unspecified application	Cancer, Cardiovascular Disease, Connective Tissue Disorders, Dermatological Diseases and Conditions, Developmental Disorder, Endocrine System Disorders, Gastrointestinal Disease, Hematological Disease, Hepatic System Disease, Hereditary Disorder, Immunological Disease, Infectious Disease, Inflammatory Disease, Inflammatory Response, Metabolic Disease, Neurological Disease, Nutritional Disease, Op…
TF	transferrin	Extracellular Space	transporter		P02787	x	efficacy,prognosis	Cancer, Dermatological Diseases and Conditions, Developmental Disorder, Endocrine System Disorders, Gastrointestinal Disease, Hematological Disease, Hereditary Disorder, Inflammatory Disease, Inflammatory Response, Metabolic Disease, Neurological Disease, Ophthalmic Disease, Organismal Injury and Abnormalities, Psychological Disorders, Reproductive System Disease, Respiratory Disease
TFRC	transferrin receptor	Plasma Membrane	transporter		P02786	x	diagnosis,efficacy	Cancer, Cardiovascular Disease, Connective Tissue Disorders, Developmental Disorder, Gastrointestinal Disease, Hematological Disease, Immunological Disease, Infectious Disease, Inflammatory Disease, Neurological Disease, Organismal Injury and Abnormalities, Renal and Urological Disease, Reproductive System Disease, Respiratory Disease, Skeletal and Muscular Disorders
TG	thyroglobulin	Extracellular Space	other		P01266	x	diagnosis,unspecified application	Cancer, Cardiovascular Disease, Connective Tissue Disorders, Developmental Disorder, Endocrine System Disorders, Gastrointestinal Disease, Hereditary Disorder, Immunological Disease, Inflammatory Disease, Inflammatory Response, Metabolic Disease, Neurological Disease, Organismal Injury and Abnormalities, Reproductive System Disease
THPO	thrombopoietin	Extracellular Space	cytokine		P40225	x	efficacy,unspecified application	Cancer, Gastrointestinal Disease, Hematological Disease, Hepatic System Disease, Immunological Disease, Inflammatory Response, Ophthalmic Disease, Organismal Injury and Abnormalities, Reproductive System Disease
TLR4	toll-like receptor 4	Plasma Membrane	transmembrane receptor	resatorvid	O00206	x	efficacy	Antimicrobial Response, Auditory Disease, Cancer, Cardiovascular Disease, Connective Tissue Disorders, Dermatological Diseases and Conditions, Developmental Disorder, Endocrine System Disorders, Gastrointestinal Disease, Hematological Disease, Hepatic System Disease, Hypersensitivity Response, Immunological Disease, Infectious Disease, Inflammatory Disease, Inflammatory Response, Metabolic Diseas…
TNC	tenascin C	Extracellular Space	other		P24821	x	diagnosis,response to therapy	Auditory Disease, Cancer, Cardiovascular Disease, Dermatological Diseases and Conditions, Gastrointestinal Disease, Hepatic System Disease, Hereditary Disorder, Inflammatory Disease, Inflammatory Response, Neurological Disease, Organismal Injury and Abnormalities, Reproductive System Disease, Respiratory Disease
TP53	tumor protein p53	Nucleus	transcription regulator		P04637	x	diagnosis,disease progression,efficacy,prognosis,response to therapy,unspecified application	Antimicrobial Response, Cancer, Cardiovascular Disease, Connective Tissue Disorders, Dermatological Diseases and Conditions, Developmental Disorder, Endocrine System Disorders, Gastrointestinal Disease, Hematological Disease, Hepatic System Disease, Hereditary Disorder, Immunological Disease, Infectious Disease, Inflammatory Disease, Inflammatory Response, Metabolic Disease, Neurological Disease,…
VIM	vimentin	Cytoplasm	other		P08670	x	diagnosis,efficacy,prognosis	Cancer, Cardiovascular Disease, Connective Tissue Disorders, Dermatological Diseases and Conditions, Developmental Disorder, Endocrine System Disorders, Gastrointestinal Disease, Hematological Disease, Hepatic System Disease, Hereditary Disorder, Immunological Disease, Inflammatory Disease, Inflammatory Response, Metabolic Disease, Neurological Disease, Nutritional Disease, Ophthalmic Disease, Or…
VWF	von Willebrand factor	Extracellular Space	other		P04275	x	diagnosis,efficacy,prognosis	Cancer, Cardiovascular Disease, Dermatological Diseases and Conditions, Endocrine System Disorders, Gastrointestinal Disease, Hematological Disease, Hereditary Disorder, Immunological Disease, Infectious Disease, Inflammatory Disease, Inflammatory Response, Metabolic Disease, Neurological Disease, Ophthalmic Disease, Organismal Injury and Abnormalities, Renal and Urological Disease, Reproductive …
WFS1	Wolfram syndrome 1 (wolframin)	Cytoplasm	enzyme		O76024	x	diagnosis	Auditory Disease, Cancer, Endocrine System Disorders, Gastrointestinal Disease, Hereditary Disorder, Metabolic Disease, Neurological Disease, Ophthalmic Disease, Psychological Disorders
XCL1	chemokine (C motif) ligand 1	Extracellular Space	cytokine		P47992	x	unspecified application	Antimicrobial Response, Cancer, Connective Tissue Disorders, Endocrine System Disorders, Gastrointestinal Disease, Hepatic System Disease, Hereditary Disorder, Immunological Disease, Infectious Disease, Inflammatory Disease, Inflammatory Response, Metabolic Disease, Neurological Disease, Ophthalmic Disease, Organismal Injury and Abnormalities, Reproductive System Disease, Skeletal and Muscular Di…

## Sheet: Methylation
Symbol	Entrez Gene Name	Location	Family	Drug(s)	GenPept/UniProt/Swiss-Prot Accession	Human	Biomarker Application(s)	Diseases
BRAF	v-raf murine sarcoma viral oncogene homolog B	Cytoplasm	enzyme	vemurafenib, dabrafenib, regorafenib, bortezomib/sorafenib, dexamethasone/lenalidomide/sorafenib, bevacizumab/sorafenib, LGX-818, dabrafenib/trametinib, sorafenib	P15056	x	diagnosis,prognosis,response to therapy	Cancer, Cardiovascular Disease, Connective Tissue Disorders, Dermatological Diseases and Conditions, Developmental Disorder, Endocrine System Disorders, Gastrointestinal Disease, Hematological Disease, Hepatic System Disease, Hereditary Disorder, Immunological Disease, Inflammatory Disease, Inflammatory Response, Neurological Disease, Ophthalmic Disease, Organismal Injury and Abnormalities, Psych…
ELAVL1	ELAV like RNA binding protein 1	Cytoplasm	other		Q15717	x	efficacy	Cancer, Developmental Disorder, Hematological Disease, Immunological Disease, Inflammatory Disease, Inflammatory Response, Neurological Disease, Organismal Injury and Abnormalities, Reproductive System Disease, Respiratory Disease
EWSR1	EWS RNA-binding protein 1	Nucleus	other		Q01844	x	unspecified application	Cancer, Connective Tissue Disorders, Dermatological Diseases and Conditions, Gastrointestinal Disease, Hepatic System Disease, Hereditary Disorder, Immunological Disease, Inflammatory Disease, Neurological Disease, Organismal Injury and Abnormalities, Psychological Disorders, Renal and Urological Disease, Reproductive System Disease, Skeletal and Muscular Disorders
G3BP2	GTPase activating protein (SH3 domain) binding protein 2	Nucleus	enzyme		Q9UN86	x	prognosis	Cancer, Gastrointestinal Disease, Infectious Disease, Organismal Injury and Abnormalities, Reproductive System Disease, Respiratory Disease
GH1	growth hormone 1	Extracellular Space	growth factor		P01241	x	efficacy	Cancer, Cardiovascular Disease, Connective Tissue Disorders, Dermatological Diseases and Conditions, Developmental Disorder, Endocrine System Disorders, Gastrointestinal Disease, Hematological Disease, Hepatic System Disease, Hereditary Disorder, Immunological Disease, Infectious Disease, Inflammatory Disease, Inflammatory Response, Metabolic Disease, Neurological Disease, Nutritional Disease, Or…
GJB2	gap junction protein, beta 2, 26kDa	Plasma Membrane	transporter		P29033	x	disease progression	Auditory Disease, Cancer, Dermatological Diseases and Conditions, Developmental Disorder, Gastrointestinal Disease, Hepatic System Disease, Hereditary Disorder, Inflammatory Response, Neurological Disease, Organismal Injury and Abnormalities, Renal and Urological Disease, Reproductive System Disease, Skeletal and Muscular Disorders
HMGA1	high mobility group AT-hook 1	Nucleus	transcription regulator		P17096	x	unspecified application	Cancer, Endocrine System Disorders, Gastrointestinal Disease, Hematological Disease, Immunological Disease, Infectious Disease, Metabolic Disease, Neurological Disease, Organismal Injury and Abnormalities, Psychological Disorders, Reproductive System Disease, Skeletal and Muscular Disorders
HNRNPDL	heterogeneous nuclear ribonucleoprotein D-like	Nucleus	other		O14979	x	unspecified application	Cancer, Gastrointestinal Disease, Hepatic System Disease, Hereditary Disorder, Infectious Disease, Metabolic Disease, Neurological Disease, Organismal Injury and Abnormalities, Psychological Disorders, Renal and Urological Disease, Skeletal and Muscular Disorders
HNRNPK	heterogeneous nuclear ribonucleoprotein K	Nucleus	other		P61978	x	prognosis	Cancer, Gastrointestinal Disease, Hepatic System Disease, Infectious Disease, Inflammatory Disease, Organismal Injury and Abnormalities, Renal and Urological Disease, Reproductive System Disease
HNRNPU	heterogeneous nuclear ribonucleoprotein U (scaffold attachment factor A)	Nucleus	transporter		Q00839	x	unspecified application	Cancer, Cardiovascular Disease, Connective Tissue Disorders, Developmental Disorder, Endocrine System Disorders, Hereditary Disorder, Infectious Disease, Metabolic Disease, Neurological Disease, Organismal Injury and Abnormalities, Psychological Disorders, Reproductive System Disease, Skeletal and Muscular Disorders
MECP2	methyl CpG binding protein 2 (Rett syndrome)	Nucleus	transcription regulator		P51608	x	unspecified application	Auditory Disease, Connective Tissue Disorders, Dental Disease, Dermatological Diseases and Conditions, Developmental Disorder, Endocrine System Disorders, Gastrointestinal Disease, Hereditary Disorder, Neurological Disease, Nutritional Disease, Organismal Injury and Abnormalities, Psychological Disorders, Reproductive System Disease, Respiratory Disease, Skeletal and Muscular Disorders
NCOA3	nuclear receptor coactivator 3	Nucleus	transcription regulator		Q9Y6Q9	x	efficacy,prognosis	Cancer, Connective Tissue Disorders, Endocrine System Disorders, Gastrointestinal Disease, Hematological Disease, Hepatic System Disease, Immunological Disease, Infectious Disease, Metabolic Disease, Nutritional Disease, Organismal Injury and Abnormalities, Reproductive System Disease
PPARGC1A	peroxisome proliferator-activated receptor gamma, coactivator 1 alpha	Nucleus	transcription regulator		Q9UBK2	x	diagnosis,efficacy	Cancer, Cardiovascular Disease, Connective Tissue Disorders, Dermatological Diseases and Conditions, Developmental Disorder, Endocrine System Disorders, Gastrointestinal Disease, Hematological Disease, Hepatic System Disease, Hereditary Disorder, Immunological Disease, Infectious Disease, Inflammatory Disease, Inflammatory Response, Metabolic Disease, Neurological Disease, Nutritional Disease, Or…
RB1	retinoblastoma 1	Nucleus	transcription regulator		P06400	x	diagnosis,efficacy,prognosis,unspecified application	Auditory Disease, Cancer, Cardiovascular Disease, Connective Tissue Disorders, Dermatological Diseases and Conditions, Developmental Disorder, Endocrine System Disorders, Gastrointestinal Disease, Hematological Disease, Hepatic System Disease, Hereditary Disorder, Immunological Disease, Infectious Disease, Inflammatory Disease, Metabolic Disease, Neurological Disease, Nutritional Disease, Ophthal…
TP53	tumor protein p53	Nucleus	transcription regulator		P04637	x	diagnosis,disease progression,efficacy,prognosis,response to therapy,unspecified application	Antimicrobial Response, Cancer, Cardiovascular Disease, Connective Tissue Disorders, Dermatological Diseases and Conditions, Developmental Disorder, Endocrine System Disorders, Gastrointestinal Disease, Hematological Disease, Hepatic System Disease, Hereditary Disorder, Immunological Disease, Infectious Disease, Inflammatory Disease, Inflammatory Response, Metabolic Disease, Neurological Disease,…
TUBA1A	tubulin, alpha 1a	Cytoplasm	other	epothilone B, colchicine/probenecid, larotaxel, eribulin, davunetide, vintafolide, milataxel, cevipabulin, gemcitabine/paclitaxel, docetaxel/prednisone, cyclophosphamide/prednisone/vincristine, docetaxel/hydrocortisone, cyclophosphamide/docetaxel, gemcitabine/vinorelbine, cyclophosphamide/daunorubicin/imatinib/prednisone/vincristine, cyclophosphamide/topotecan/vincristine, docetaxel/gemcitabine, …	Q71U36	x	unspecified application	Cancer, Cardiovascular Disease, Connective Tissue Disorders, Dermatological Diseases and Conditions, Developmental Disorder, Endocrine System Disorders, Gastrointestinal Disease, Hematological Disease, Hereditary Disorder, Immunological Disease, Infectious Disease, Inflammatory Disease, Inflammatory Response, Metabolic Disease, Neurological Disease, Ophthalmic Disease, Organismal Injury and Abnor…
TUBA1B	tubulin, alpha 1b	Cytoplasm	other		P68363	x	diagnosis,efficacy	Cancer, Neurological Disease, Organismal Injury and Abnormalities, Psychological Disorders, Reproductive System Disease, Skeletal and Muscular Disorders

## Sheet: SUMOylation
Symbol	Entrez Gene Name	Location	Family	Drug(s)	GenPept/UniProt/Swiss-Prot Accession	Human	Biomarker Application(s)	Diseases
APP	amyloid beta (A4) precursor protein	Plasma Membrane	other	bapineuzumab, florbetapir F18	P05067	x	diagnosis,efficacy,unspecified application	Cancer, Cardiovascular Disease, Dermatological Diseases and Conditions, Developmental Disorder, Endocrine System Disorders, Gastrointestinal Disease, Hematological Disease, Hepatic System Disease, Hereditary Disorder, Immunological Disease, Infectious Disease, Inflammatory Disease, Inflammatory Response, Metabolic Disease, Neurological Disease, Nutritional Disease, Ophthalmic Disease, Organismal …
ESR1	estrogen receptor 1	Nucleus	ligand-dependent nuclear receptor	17-alpha-ethinylestradiol, fulvestrant, beta-estradiol, estradiol 17beta-cypionate, estriol, estrone, estradiol valerate, mestranol, 3-(4-methoxy)phenyl-4-((4-(2-(1-piperidinyl)ethoxy)phenyl)methyl)-2H-1-benzopyran-7-ol, bazedoxifene, estradiol valerate/testosterone enanthate, TAS-108, ethynodiol diacetate, ethinyl estradiol/ethynodiol diacetate, estradiol acetate, esterified estrogens, estradiol…	P03372	x	diagnosis,disease progression,efficacy,prognosis,response to therapy	Cancer, Cardiovascular Disease, Connective Tissue Disorders, Dermatological Diseases and Conditions, Developmental Disorder, Endocrine System Disorders, Gastrointestinal Disease, Hematological Disease, Hepatic System Disease, Hereditary Disorder, Immunological Disease, Infectious Disease, Inflammatory Disease, Inflammatory Response, Metabolic Disease, Neurological Disease, Nutritional Disease, Op…
IGF1R	insulin-like growth factor 1 receptor	Plasma Membrane	transmembrane receptor	linsitinib, cixutumumab, ganitumab, AVE1642, BIIB022, IGF1	P08069	x	diagnosis,efficacy,prognosis	Cancer, Cardiovascular Disease, Dermatological Diseases and Conditions, Developmental Disorder, Endocrine System Disorders, Gastrointestinal Disease, Hematological Disease, Hepatic System Disease, Hereditary Disorder, Immunological Disease, Infectious Disease, Inflammatory Disease, Inflammatory Response, Metabolic Disease, Neurological Disease, Nutritional Disease, Organismal Injury and Abnormali…
NPM1	nucleophosmin (nucleolar phosphoprotein B23, numatrin)	Nucleus	transcription regulator		P06748	x	disease progression,unspecified application	Cancer, Gastrointestinal Disease, Hematological Disease, Hepatic System Disease, Hereditary Disorder, Immunological Disease, Inflammatory Response, Neurological Disease, Organismal Injury and Abnormalities, Psychological Disorders, Renal and Urological Disease, Skeletal and Muscular Disorders
SNCA	synuclein, alpha (non A4 component of amyloid precursor)	Cytoplasm	other		P37840	x	diagnosis,disease progression,prognosis	Cancer, Cardiovascular Disease, Connective Tissue Disorders, Developmental Disorder, Hereditary Disorder, Immunological Disease, Infectious Disease, Inflammatory Disease, Inflammatory Response, Metabolic Disease, Neurological Disease, Ophthalmic Disease, Organismal Injury and Abnormalities, Psychological Disorders, Reproductive System Disease, Skeletal and Muscular Disorders
VHL	von Hippel-Lindau tumor suppressor, E3 ubiquitin protein ligase	Nucleus	transcription regulator		P40337	x	diagnosis,efficacy	Cancer, Cardiovascular Disease, Connective Tissue Disorders, Dermatological Diseases and Conditions, Developmental Disorder, Gastrointestinal Disease, Hematological Disease, Hepatic System Disease, Hereditary Disorder, Immunological Disease, Inflammatory Disease, Inflammatory Response, Neurological Disease, Organismal Injury and Abnormalities, Renal and Urological Disease, Reproductive System Dis…

## Sheet: Hydroxylation
Symbol	Entrez Gene Name	Location	Family	Drug(s)	GenPept/UniProt/Swiss-Prot Accession	Human	Biomarker Application(s)	Diseases
ADIPOQ	adiponectin, C1Q and collagen domain containing	Extracellular Space	other		Q15848	x	diagnosis,efficacy,prognosis,response to therapy,safety,unspecified application	Cancer, Cardiovascular Disease, Connective Tissue Disorders, Dermatological Diseases and Conditions, Developmental Disorder, Endocrine System Disorders, Gastrointestinal Disease, Hematological Disease, Hepatic System Disease, Hereditary Disorder, Hypersensitivity Response, Immunological Disease, Inflammatory Disease, Inflammatory Response, Metabolic Disease, Neurological Disease, Nutritional Dise…
ADRB2	adrenoceptor beta 2, surface	Plasma Membrane	G-protein coupled receptor	articaine/epinephrine, bupivacaine/epinephrine, carteolol, dipivefrin, meluadrine, epinephrine/prilocaine, epinephrine/lidocaine, bedoradrine, KUL 7211, arformoterol, indacaterol, PYM-50018, budesonide/formoterol, nebivolol, vilanterol, formoterol/mometasone furoate, glycopyrrolate/indacaterol, latanoprost/timolol, umeclidinium/vilanterol, fluticasone/salmeterol, albuterol/ipratropium, carvedilol…	P07550	x	diagnosis,efficacy,unspecified application	Cancer, Cardiovascular Disease, Connective Tissue Disorders, Dermatological Diseases and Conditions, Developmental Disorder, Endocrine System Disorders, Gastrointestinal Disease, Hematological Disease, Hepatic System Disease, Hereditary Disorder, Immunological Disease, Infectious Disease, Inflammatory Disease, Inflammatory Response, Metabolic Disease, Neurological Disease, Nutritional Disease, Op…
ELN	elastin	Extracellular Space	other		P15502	x	diagnosis	Cancer, Cardiovascular Disease, Connective Tissue Disorders, Dermatological Diseases and Conditions, Developmental Disorder, Hereditary Disorder, Inflammatory Disease, Inflammatory Response, Metabolic Disease, Neurological Disease, Organismal Injury and Abnormalities, Respiratory Disease
MBL2	mannose-binding lectin (protein C) 2, soluble	Extracellular Space	other		P11226	x	diagnosis	Antimicrobial Response, Cancer, Cardiovascular Disease, Connective Tissue Disorders, Gastrointestinal Disease, Hematological Disease, Hypersensitivity Response, Immunological Disease, Infectious Disease, Inflammatory Disease, Inflammatory Response, Nutritional Disease, Organismal Injury and Abnormalities, Renal and Urological Disease, Skeletal and Muscular Disorders

## Sheet: Sulfation
Symbol	Entrez Gene Name	Location	Family	Drug(s)	GenPept/UniProt/Swiss-Prot Accession	Human	Biomarker Application(s)	Diseases
CCR5	chemokine (C-C motif) receptor 5 (gene/pseudogene)	Plasma Membrane	G-protein coupled receptor	maraviroc, vicriviroc, ancriviroc	P51681	x	diagnosis,efficacy	Cancer, Cardiovascular Disease, Connective Tissue Disorders, Dermatological Diseases and Conditions, Endocrine System Disorders, Gastrointestinal Disease, Hematological Disease, Hepatic System Disease, Immunological Disease, Infectious Disease, Inflammatory Disease, Inflammatory Response, Metabolic Disease, Neurological Disease, Nutritional Disease, Ophthalmic Disease, Organismal Injury and Abnor…
F8	coagulation factor VIII, procoagulant component	Extracellular Space	peptidase	drotrecogin alfa	P00451	x	diagnosis,efficacy	Cancer, Cardiovascular Disease, Endocrine System Disorders, Gastrointestinal Disease, Hematological Disease, Hereditary Disorder, Immunological Disease, Infectious Disease, Inflammatory Disease, Inflammatory Response, Neurological Disease, Organismal Injury and Abnormalities, Reproductive System Disease, Respiratory Disease
